# Supplementary material for: H1 restricts euchromatin-associated methylation pathways from heterochromatic encroachment
Source: eLife. 2024 May 30;12:RP89353. doi: 10.7554/eLife.89353 (PMC11139477; doi:10.7554/eLife.89353)
Supplement: Supplementary file 1. [file elife-89353-supp1.xlsx]

## Sheet: Sheet1
Gene	Name	Tair10 ID	WT-rep5	WT-rep6	WT-rep7	h1-rep1	h1-rep2	h1-rep3	logFC	PValue	FDR
MET1	VIM1	AT1G57820	5.59	8.04	3.55	4.07	5.1	4.09	-0.393869	0.179096	0.521798
	VIM2	AT1G66050	0.45	1.1	0.74	0.59	1.34	0.85	0.226169	0.630642	0.853317
	VIM3	AT5G39550	3.69	4.24	1.97	2.08	2.45	2.29	-0.569097	0.0761579	0.361998
	VIM4	AT1G66040	0	0.09	0.09	0	0	0.15	NA
	VIM5	AT1G57800	0	0	0	0.06	0	0	NA
	VIM6	AT4G08590	1.36	1.01	1.23	0.94	1.43	1.72	0.0988352	0.828979	0.943195
	MET1	AT5G49160	7.75	11.77	6.15	7.79	8.42	7.16	-0.149811	0.566651	0.822085
	MET2a	AT4G14140	2.06	2.22	0.36	1.93	1.12	0.23	-0.434306	0.585453	0.83149
	MET3	AT5G59340	0.39	0.77	0.08	0.39	0.27	0.19	NA
CMT3	SUVH4	AT5G13960	4.69	4.9	3.74	3.25	4.19	3.61	-0.326458	0.188713	0.532368
	CMT2	AT4G19020	2.28	3.15	1.82	2.19	2.17	2.38	-0.125913	0.628751	0.852552
	CMT3	AT1G69770	2.26	3	2.7	2.26	3.39	3.11	0.0778908	0.767836	0.917935
	SHH1	AT1G15215	1.54	4.43	2.74	3.1	2.39	3.16	0.013539	0.982608	0.999069
	SHH2	AT3G18380	6.1	6.33	8.14	5.92	5.95	7.64	-0.140009	0.621333	0.849978
PolIV recruit	CLSY1	AT3G42670	2.58	3.65	1.12	2.15	2.57	2.63	-0.0128542	0.978905	0.998172
	CLSY2	At5G20420	0.44	0.45	0.25	0.39	0.76	0.34	0.308684	0.506015	0.789842
PolIV	NRPD1	AT1G63020	0.98	0.9	0.51	0.58	0.6	0.77	-0.329193	0.360412	0.697453
PolIV + PolV	NRPD2/NRPE2	AT3G23780	6.54	8.22	4.04	5.61	6.21	5.63	-0.12827	0.637776	0.857358
PolIV + PolV	NRPD4/NRPE4	AT4G15950	0.27	0.45	0.75	0.85	1.19	1.28	0.063441	0.836582	0.945997
Pol V	NRPE1	AT2G40030	1.51	1.99	0.79	1.33	1.68	1.56	0.458752	0.241034	0.592428
	NRPE5	AT3G57080	2.94	3.77	6.23	5.82	6.89	5.92	0.427744	0.486269	0.778799
	NRPE9B	AT4G16265	1.35	1.29	3.3	1.83	2.6	4.18	NA
Pol V recruit	DRD1	AT2G16390	1.9	2.46	1.31	1.24	1.55	1.82	-0.337517	0.268909	0.619038
	DMS3	AT3G49250	1.49	2.61	1.1	1.14	1.67	1.68	-0.237872	0.541776	0.809169
	RDM1	AT3G22680	5.32	4.09	10	8.92	8.9	10.13	0.43743	0.308415	0.653303
	SUVH2	AT2G33290	2.86	2.68	3.66	2.47	3.43	3.12	-0.108003	0.717822	0.895144
	SUVH9	AT4G13460	6.92	7.3	5.45	5.37	4.15	4.34	-0.544739	0.0482181	0.293924
RdDM	RDR2	AT4G11130	1.46	1.47	0.68	0.8	1.13	0.79	-0.44877	0.241945	0.593332
	DCL1	AT1G01040	8.37	12.76	5.04	5.53	7.14	6.86	-0.404369	0.166828	0.505972
	DCL2	AT3G03300	1.41	2.89	1.46	1.32	1.43	2.01	-0.252246	0.404175	0.728704
	DCL3	AT3G43920	0.95	1.12	0.63	1.11	1.44	1.11	0.376506	0.217297	0.566309
	DCL4	AT5G20320	1.77	2.42	1.53	1.34	2.04	1.94	-0.157061	0.531433	0.803534
	HEN1	AT4G20910	0.59	0.78	0.47	0.66	0.61	0.85	0.18963	0.619903	0.849272
	AGO4	AT2G27040	3.1	4.05	3.06	4.16	4.16	3.54	0.185975	0.454209	0.760198
	KTF1	AT5G04290	28.39	33.91	17.26	18.41	18.91	17.67	-0.554599	0.0491837	0.296974
	IDN2	AT3G48670	10.81	14.7	7.36	11.67	12.09	9.4	0.0194519	0.943721	0.986967
	IDL1	AT3G25655	0.24	0	0.13	0	0.73	0.96	NA
	IDL2	AT5G64667	0	0	0.66	0.08	0.55	0	NA
	SUVR2	AT5G43990	0.6	1.14	0.53	0.9	0.92	0.83	0.230602	0.565655	0.821357
	DMS4	AT2G30280	2.98	3.32	2.4	4.02	4.13	4.19	0.463947	0.108525	0.425147
	UBP26	AT3G49600	4.23	6.75	2.71	3.17	3.36	3.58	-0.445535	0.134877	0.463987
	DRM2	AT5G14620	2.41	1.95	2.23	2.52	3.21	2.5	0.245786	0.420478	0.741264
	LDL1	AT1G62830	3.59	3.44	3.29	3.49	4.17	3.92	0.106102	0.668913	0.872096
	LDL2	AT3G13682	1.33	2.31	0.84	0.72	0.8	0.71	-1.0128	0.0155564	0.170965
	JMJ14	AT4G20400	7.6	11.14	6.75	7.41	8.51	7.65	-0.136508	0.562676	0.820355
	HDA6	AT5G63110	10.67	14.83	7.77	7.4	9.18	9.18	-0.39973	0.11267	0.432508
Others	RDR6	AT3G49500	3.31	4.79	2.8	2.47	3.69	3.11	-0.276408	0.265618	0.614802
	MOM1	AT1G08060	5.4	8.13	3.07	4.27	5.6	4.92	-0.182828	0.552014	0.815327
	MORC6	AT1G19100	1.99	2.66	1.98	2.37	2.35	2.19	0.0307615	0.917377	0.976471
	DDM1	AT5G66750	2.24	2.66	1.9	1.95	2.65	1.9	-0.114142	0.690465	0.883186
from another paper **	NRPB1	AT4G35800	28.94	40.38	25.05	24.23	28.1	26.39	-0.291954	0.237635	0.589436
	AGO6	AT2G32940	0.1	0.2	0.04	0.57	0.49	0.32	2.00623	0.00115625	0.039376
	AGO9	AT5G21150	0.01	0.05	0.08	0.38	0.43	0.54	3.12976	1.51044e-06	0.00031614
	IDN2 PARALOGUE 1 (IDP1)	AT1G15910	9.52	12.66	8.19	10.68	9.99	9.87	-0.0125959	0.960922	0.992077
	IDP2	AT4G00380	1.57	1.34	0.85	1.49	1.5	0.81	-0.0204681	0.981526	0.998909
	MICRORCHIDIA 1 (MORC1)	AT4G36290	2.06	3.56	2.98	3.78	3.58	3.1	0.262887	0.38447	0.713459
	NEEDED FOR RDR2-INDEPENDENT DNA METHYLATION (NERD)	AT2G16485	10.68	15.68	8.49	8.81	9.68	9.84	-0.320082	0.200958	0.547413
	SUVH1	AT5G04940	1.39	2.27	1.7	1.48	2.44	1.18	-0.118041	0.743434	0.905794
	SUVH3	AT1G73100	4.29	5.08	4.26	2.36	3.95	3.64	-0.522506	0.0380046	0.264957
	DNAJ1	AT5G64360	6.11	7.84	3.79	4.39	5.54	5.39	-0.275008	0.329239	0.670822
	DNAJ2	AT2G01710	4.06	5.36	8.98	8.47	7.12	9.23	0.371342	0.323055	0.664738
GEO ID	Name
GSM4074733	wt_RNA_rep5
GSM4074734	wt_RNA_rep6
GSM4074735	wt_RNA_rep7
GSM4074736	h1_RNA_rep1
GSM4074737	h1_RNA_rep2
GSM4074738	h1_RNA_rep3
Data download from Choi 2020 Mol Cell
