# Supplementary material for: H1 restricts euchromatin-associated methylation pathways from heterochromatic encroachment
Source: eLife. 2024 May 30;12:RP89353. doi: 10.7554/eLife.89353 (PMC11139477; doi:10.7554/eLife.89353)
Supplement: Supplementary file 2. [file elife-89353-supp2.xlsx]

## Sheet: Sheet1
Table WGBS conversion rate estimated by chroloplast methylation rate
Sample	Type	ChrC_level	Conversion rate (%)
WT_r1	CG	0.00428946	99.5711
	CHG	0.00413479	99.5865
	CHH	0.00344676	99.6553
WT_r2	CG	0.00439009	99.561
	CHG	0.00417166	99.5828
	CHH	0.00350114	99.6499
h1_r1	CG	0.00473948	99.5261
	CHG	0.00465105	99.5349
	CHH	0.00372086	99.6279
h1_r2	CG	0.00458207	99.5418
	CHG	0.00431441	99.5686
	CHH	0.0035264	99.6474
nrpe1_r1	CG	0.00469967	99.53
	CHG	0.00431067	99.5689
	CHH	0.0035556	99.6444
nrpe1_r2	CG	0.00456697	99.5433
	CHG	0.00434908	99.5651
	CHH	0.00354829	99.6452
h1nrpe1_n49	CG	0.00446625	99.5534
	CHG	0.00420543	99.5795
	CHH	0.00354677	99.6453
h1nrpe1_n63	CG	0.00431647	99.5684
	CHG	0.00414667	99.5853
	CHH	0.00345623	99.6544
