# Supplementary material for: H1 restricts euchromatin-associated methylation pathways from heterochromatic encroachment
Source: eLife. 2024 May 30;12:RP89353. doi: 10.7554/eLife.89353 (PMC11139477; doi:10.7554/eLife.89353)
Supplement: Supplementary file 3. [file elife-89353-supp3.xlsx]

## Sheet: summary
Bed file list name:	where used:	Original publication:
Long to short TEs	Fig 1, Fig 6	Liu et al 2018 (doi: 10.1038/s41477-017-0100-y)
drm12 hypo CHH	Fig 1, Fig 6	Zhang et al 2018 (DOI: 10.1073/pnas.1716300115)
cmt2 hypo CHH	Fig 1, Fig 6	Zhang et al 2018 (DOI: 10.1073/pnas.1716300115)
euchromatic TEs	Fig 1, Fig 6	Papareddy et al 2020 (DOI: 10.1186/s13059-020-02163-4)
heterochromatic TEs	Fig 1, Fig 6	Papareddy et al 2020 (DOI: 10.1186/s13059-020-02163-4)
H2A.W peaks	Sup Fig 3	Bourguet et al 2021 (DOI: 10.1038/s41467-021-22993-5)
ZF Off target peaks	Fig 2	Gallego-Bartolomé et al (DOI: 10.1016/j.cell.2019.01.029)
ZF Off target peaks gain CHH	Fig 2	Gallego-Bartolomé et al (DOI: 10.1016/j.cell.2019.01.029)
H3K27me3 gain genes	Sup Fig 3	Teano et al 2023 (DOI: 10.1016/j.celrep.2023.112894)
H3K27me3 loss genes	Sup Fig 3	Teano et al 2023 (DOI: 10.1016/j.celrep.2023.112894)
NRPE1 peaks	Fig 2	Liu et al 2018 (doi: 10.1038/s41477-017-0100-y)
NRPE1 hypo CHH	Sup Fig 4	Zhang et al 2018 (DOI: 10.1073/pnas.1716300115)
NRPE1 gain regions	Fig 5	This paper
NRPE1 loss regions	Fig 5	This paper
hyper CHG in h1	Fig 4	This paper

## Sheet: Long vs Short TEs
	All				500to1k				1kto2k				2kto5k				5k
	Chr1	17024	18924		Chr1	7023546	7024535		Chr1	17015858	17016880		Chr1	16987716	16989955		Chr1	22846336	22854554
	Chr1	55676	56576		Chr1	6196419	6197401		Chr1	17015858	17016880		Chr1	18324372	18326405		Chr1	19336306	19345618
	Chr1	76844	77500		Chr1	9907902	9908868		Chr1	12185282	12186309		Chr1	10602557	10604986		Chr1	6538419	6543539
	Chr1	256075	256920		Chr1	12425690	12426661		Chr1	2415020	2416036		Chr1	10602557	10604986		Chr1	6538419	6543539
	Chr1	257710	258629		Chr1	20465427	20466401		Chr1	11983130	11984131		Chr1	11789450	11794079		Chr1	6704197	6709404
	Chr1	432995	433837		Chr1	12143179	12144154		Chr1	17240901	17241909		Chr1	23118240	23123214		Chr1	10357357	10363358
	Chr1	540417	540985		Chr1	20174321	20175287		Chr1	11834923	11836068		Chr1	13559846	13564825		Chr1	10357357	10363358
	Chr1	669867	670631		Chr1	3761903	3762819		Chr1	21918286	21919763		Chr1	10696714	10701584		Chr1	10357357	10363358
	Chr1	696447	697372		Chr1	24837368	24838286		Chr1	17267055	17268180		Chr1	10696714	10701584		Chr1	7714708	7722547
	Chr1	697387	697951		Chr1	19665949	19666845		Chr1	19703141	19704372		Chr1	12333649	12338510		Chr1	14188117	14193130
	Chr1	781194	782748		Chr1	55676	56576		Chr1	12246436	12247641		Chr1	5691740	5696671		Chr1	13187278	13192359
	Chr1	1275795	1276621		Chr1	55676	56576		Chr1	26358799	26360000		Chr1	5691740	5696671		Chr1	26366603	26371673
	Chr1	1441741	1442976		Chr1	3250579	3251485		Chr1	7528106	7529158		Chr1	29474555	29479485		Chr1	13263763	13276157
	Chr1	1592656	1593745		Chr1	9853586	9854513		Chr1	24645066	24646116		Chr1	29474555	29479485		Chr1	7969361	7974385
	Chr1	1613272	1614662		Chr1	8538891	8539819		Chr1	24831579	24832636		Chr1	19931970	19934270		Chr1	7969361	7974385
	Chr1	1974854	1975397		Chr1	21127990	21128869		Chr1	17654583	17655619		Chr1	16987616	16990441		Chr1	2788430	2800701
	Chr1	1975442	1976072		Chr1	11636077	11637042		Chr1	24704987	24706028		Chr1	7281534	7284779		Chr1	8453486	8461797
	Chr1	1976110	1977174		Chr1	6758935	6759700		Chr1	17151789	17152908		Chr1	8729256	8733277		Chr1	8453486	8461797
	Chr1	2415020	2416036		Chr1	4293328	4294088		Chr1	24101683	24102799		Chr1	8729256	8733277		Chr1	17035033	17050039
	Chr1	2531451	2534781		Chr1	3926904	3927654		Chr1	1592656	1593745		Chr1	11979621	11982674		Chr1	17035065	17050021
	Chr1	2657418	2657920		Chr1	6378719	6379470		Chr1	13851265	13852459		Chr1	25159043	25163500		Chr1	9004836	9015724
	Chr1	2788430	2800701		Chr1	13155542	13156291		Chr1	13851265	13852459		Chr1	4329877	4334393		Chr2	5040995	5048412
	Chr1	2986348	2986950		Chr1	10982120	10982866		Chr1	21738689	21740552		Chr1	4329877	4334393		Chr2	4027024	4045789
	Chr1	3073227	3075036		Chr1	22818100	22818880		Chr1	21738689	21740552		Chr1	11752261	11755077		Chr2	2274203	2280054
	Chr1	3250579	3251485		Chr1	24704182	24704959		Chr1	19808116	19810029		Chr2	514681	517194		Chr2	6837289	6843328
	Chr1	3251486	3252211		Chr1	26551492	26552205		Chr1	19808116	19810029		Chr2	11559449	11561789		Chr2	7300023	7308043
	Chr1	3360626	3361316		Chr1	24484054	24484762		Chr1	4111111	4113062		Chr2	2280055	2282263		Chr2	1505385	1513550
	Chr1	3497680	3498873		Chr1	27675433	27676136		Chr1	20979423	20980832		Chr2	10036535	10040268		Chr2	1741426	1757083
	Chr1	3547014	3547591		Chr1	22778334	22779072		Chr1	11491440	11492840		Chr2	1673605	1676235		Chr2	1741426	1757083
	Chr1	3573163	3573682		Chr1	7138402	7139137		Chr1	20397885	20399270		Chr2	1673605	1676235		Chr2	566757	582571
	Chr1	3761903	3762819		Chr1	3251486	3252211		Chr1	6236275	6237764		Chr2	2849744	2852332		Chr2	4508417	4513686
	Chr1	3771003	3772133		Chr1	13149788	13150516		Chr1	18302777	18304452		Chr2	2849744	2852332		Chr2	6700893	6706745
	Chr1	3825781	3827697		Chr1	23856454	23857302		Chr1	25034157	25035674		Chr2	9313146	9315252		Chr2	6700893	6706745
	Chr1	3925331	3926124		Chr1	12339286	12340088		Chr1	9957339	9958844		Chr2	9313146	9315252		Chr2	3061229	3074307
	Chr1	3926904	3927654		Chr1	29983277	29984079		Chr1	6593173	6594618		Chr2	7881639	7883747		Chr2	1781546	1786791
	Chr1	4093294	4094494		Chr1	19876248	19877040		Chr1	28703306	28704766		Chr2	7881639	7883747		Chr3	17429622	17437290
	Chr1	4111111	4113062		Chr1	22111959	22112753		Chr1	6742979	6744224		Chr2	5610303	5612406		Chr3	17429622	17437290
	Chr1	4292790	4293327		Chr1	21946201	21947011		Chr1	19704373	19705615		Chr2	15595121	15597210		Chr3	8842971	8857757
	Chr1	4293328	4294088		Chr1	12439397	12440220		Chr1	10567972	10569320		Chr2	2318504	2322143		Chr3	23109446	23115857
	Chr1	4329877	4334393		Chr1	12439397	12440220		Chr1	10567972	10569320		Chr2	6468806	6470844		Chr3	11541283	11549498
	Chr1	4414959	4415610		Chr1	28526861	28527671		Chr1	27859648	27860967		Chr2	1423165	1425427		Chr3	14062034	14072953
	Chr1	4493275	4493928		Chr1	21977156	21977749		Chr1	6454677	6456015		Chr2	2153889	2157853		Chr3	9723884	9736151
	Chr1	4651559	4660722		Chr1	23247299	23247895		Chr1	11617703	11619060		Chr2	14553742	14555904		Chr3	14097290	14111363
	Chr1	4706567	4708276		Chr1	11732355	11732947		Chr1	17024	18924		Chr2	10950317	10952384		Chr3	9387867	9393251
	Chr1	5531285	5531953		Chr1	11732355	11732947		Chr1	17024	18924		Chr2	2302461	2307173		Chr3	17143391	17157692
	Chr1	5691740	5696671		Chr1	9335611	9336202		Chr1	17017022	17018618		Chr2	14407884	14412426		Chr3	17143391	17157692
	Chr1	5958628	5959682		Chr1	23885397	23885978		Chr1	10155201	10156790		Chr2	17337767	17342489		Chr3	10106100	10111467
	Chr1	6009292	6014092		Chr1	15890200	15891183		Chr1	13128072	13129685		Chr2	2902330	2907117		Chr3	2808422	2818893
	Chr1	6102454	6103091		Chr1	17349654	17350231		Chr1	21602974	21604616		Chr2	6881261	6884610		Chr4	5257027	5271699
	Chr1	6156401	6158864		Chr1	7787626	7788203		Chr1	1441741	1442976		Chr2	1665233	1668533		Chr4	5407776	5414972
	Chr1	6196419	6197401		Chr1	6302582	6303156		Chr1	1441741	1442976		Chr3	17055553	17057941		Chr4	5407776	5414972
	Chr1	6198003	6199615		Chr1	15984830	15985729		Chr2	8035386	8036872		Chr3	19621942	19624005		Chr4	9570499	9575603
	Chr1	6233921	6235720		Chr1	7725248	7725868		Chr2	8035386	8036872		Chr3	18308793	18310956		Chr4	631181	636931
	Chr1	6236275	6237764		Chr1	17873230	17873851		Chr2	4522545	4524021		Chr3	14237710	14242634		Chr4	631181	636931
	Chr1	6273523	6276128		Chr1	1975442	1976072		Chr2	2922388	2923829		Chr3	10460990	10463046		Chr4	10899528	10904738
	Chr1	6302582	6303156		Chr1	13150517	13151142		Chr2	19322501	19323957		Chr3	11097260	11099626		Chr4	2245569	2256834
	Chr1	6378719	6379470		Chr1	12041783	12042411		Chr2	19527734	19529185		Chr3	11097260	11099626		Chr4	10992996	10998058
	Chr1	6379972	6380659		Chr1	13850479	13851106		Chr2	7350212	7351546		Chr3	18791152	18796089		Chr4	8313636	8319046
	Chr1	6403764	6405272		Chr1	21918430	21918995		Chr2	11991785	11993117		Chr3	18791152	18796089		Chr4	8313636	8319046
	Chr1	6454677	6456015		Chr1	10160999	10161600		Chr2	1312743	1314083		Chr3	21322657	21327537		Chr4	6723347	6728790
	Chr1	6538419	6543539		Chr1	24604958	24605560		Chr2	811547	812862		Chr3	14804955	14809563		Chr5	12615236	12622961
	Chr1	6587128	6588246		Chr1	29588228	29588826		Chr2	7899776	7901147		Chr3	22232308	22236743		Chr5	17596759	17605846
	Chr1	6593173	6594618		Chr1	18033271	18034112		Chr2	5591472	5592863		Chr3	11016111	11020804		Chr5	8571574	8577832
	Chr1	6640487	6640989		Chr1	21872179	21872788		Chr2	10466227	10467597		Chr3	11793559	11798454		Chr5	12616214	12621590
	Chr1	6704197	6709404		Chr1	20795646	20796157		Chr2	15007634	15009235		Chr3	8328187	8330497		Chr5	14574599	14580412
	Chr1	6742979	6744224		Chr1	24576063	24576584		Chr2	401158	402774		Chr3	13806245	13809268		Chr5	5701673	5706730
	Chr1	6758935	6759700		Chr1	20153634	20154352		Chr2	1729996	1731644		Chr3	14910927	14913451		Chr5	13960646	13968612
	Chr1	7023546	7024535		Chr1	19380995	19381516		Chr2	7069464	7070960		Chr4	5673996	5676613		Chr5	135831	141287
	Chr1	7132354	7132972		Chr1	14187558	14188058		Chr2	2985784	2987306		Chr4	1280596	1283240		Chr5	19358618	19363928
	Chr1	7138402	7139137		Chr1	12651410	12651914		Chr2	5387019	5388592		Chr4	2310763	2313234		Chr1	16742379	16751122
	Chr1	7281534	7284779		Chr1	8160056	8160565		Chr2	6179827	6180959		Chr4	2310763	2313234		Chr1	18002177	18007370
	Chr1	7352930	7365197		Chr1	2657418	2657920		Chr2	1902752	1903923		Chr4	2318376	2320411		Chr1	22693955	22699336
	Chr1	7505041	7505756		Chr1	25331531	25332083		Chr2	7070961	7072149		Chr4	8327633	8329716		Chr1	19374609	19380747
	Chr1	7528106	7529158		Chr1	16710551	16711103		Chr2	7070961	7072149		Chr4	6113710	6116485		Chr1	7352930	7365197
	Chr1	7714708	7722547		Chr1	697387	697951		Chr2	7959807	7961561		Chr4	4309188	4314013		Chr1	7352930	7365197
	Chr1	7725248	7725868		Chr1	22112754	22113280		Chr2	292731	293916		Chr4	5192472	5194635		Chr1	4651559	4660722
	Chr1	7761201	7762110		Chr1	1974854	1975397		Chr2	14810760	14811945		Chr4	3940830	3945016		Chr1	26030839	26036307
	Chr1	7786504	7787318		Chr1	29313050	29313596		Chr2	1441857	1442963		Chr4	11036485	11040233		Chr1	11280217	11285438
	Chr1	7787626	7788203		Chr1	11125041	11125699		Chr2	7347549	7348692		Chr4	5822426	5827300		Chr1	11302246	11310368
	Chr1	7833186	7834254		Chr1	6379972	6380659		Chr2	7886420	7887562		Chr4	9954151	9958038		Chr1	16626037	16637234
	Chr1	7852212	7852860		Chr1	24955986	24956637		Chr2	2192501	2193620		Chr4	17712148	17716980		Chr1	22620537	22627023
	Chr1	7969361	7974385		Chr1	21066910	21067588		Chr2	215551	216683		Chr4	5664683	5667847		Chr2	1264727	1271840
	Chr1	7975862	7976602		Chr1	4493275	4493928		Chr2	5942388	5943522		Chr4	1016803	1021368		Chr2	1264727	1271840
	Chr1	8160056	8160565		Chr1	76844	77500		Chr2	675552	676681		Chr5	7909602	7911784		Chr2	6778862	6785573
	Chr1	8453486	8461797		Chr1	4414959	4415610		Chr2	1154664	1155913		Chr5	3944943	3947148		Chr2	6524256	6533075
	Chr1	8538081	8538854		Chr1	16667243	16667899		Chr2	2983860	2985105		Chr5	4640763	4642974		Chr2	6766438	6772521
	Chr1	8538891	8539819		Chr1	10195904	10196603		Chr2	7526282	7527528		Chr5	15161497	15163864		Chr2	2542617	2559353
	Chr1	8729256	8733277		Chr1	19330143	19330778		Chr2	786196	787440		Chr5	9020350	9022599		Chr2	52644	58681
	Chr1	8927732	8933058		Chr1	23141285	23141922		Chr2	1393902	1395151		Chr5	2441253	2443637		Chr2	4861229	4869425
	Chr1	9000001	9001095		Chr1	5531285	5531953		Chr2	7535956	7537244		Chr5	2603142	2605573		Chr2	3636370	3645326
	Chr1	9004836	9015724		Chr1	6102454	6103091		Chr2	6176922	6178229		Chr5	18413671	18416199		Chr2	5960275	5975813
	Chr1	9125777	9126902		Chr2	238125	238646		Chr2	1987723	1989017		Chr5	15075388	15077865		Chr2	10085509	10093594
	Chr1	9304765	9305904		Chr2	11760358	11761198		Chr2	1457071	1458341		Chr5	2374076	2377446		Chr2	10085509	10093594
	Chr1	9335611	9336202		Chr2	3109915	3110725		Chr2	1684821	1686097		Chr5	2374076	2377446		Chr2	1758540	1766569
	Chr1	9572801	9574191		Chr2	13374540	13375293		Chr2	1691344	1692561		Chr5	13886472	13890658		Chr2	8872130	8883513
	Chr1	9585965	9587249		Chr2	2191057	2191575		Chr2	794450	795647		Chr5	15148493	15151482		Chr2	8872130	8883513
	Chr1	9853586	9854513		Chr2	1038912	1039436		Chr2	1503834	1505066		Chr5	15148493	15151482		Chr2	10001480	10009658
	Chr1	9902765	9903407		Chr2	8156789	8157622		Chr2	17487163	17489023		Chr5	21542894	21546691		Chr2	2041964	2054217
	Chr1	9907902	9908868		Chr2	639521	640379		Chr2	8708150	8710005		Chr5	17441792	17445927		Chr2	2075339	2080607
	Chr1	9915357	9916480		Chr2	2355598	2356098		Chr2	4545528	4547505		Chr5	15205109	15207898		Chr2	3986485	4005114
	Chr1	9957339	9958844		Chr2	2330078	2330578		Chr2	7454892	7456634		Chr3	15361697	15365347		Chr2	3986485	4005114
	Chr1	10021369	10021965		Chr2	2177130	2177749		Chr2	8883841	8885588		Chr4	10171927	10174176		Chr2	8561844	8567009
	Chr1	10155201	10156790		Chr2	998623	999137		Chr2	4005636	4007377		Chr1	25639635	25641849		Chr2	8561844	8567009
	Chr1	10160999	10161600		Chr2	12106750	12107260		Chr2	4007517	4008741		Chr1	6156401	6158864		Chr2	7224084	7229124
	Chr1	10195904	10196603		Chr2	6497154	6497664		Chr2	5944595	5945744		Chr1	11735186	11737670		Chr2	7224084	7229124
	Chr1	10357357	10363358		Chr2	1680470	1681002		Chr2	685814	687238		Chr1	11735186	11737670		Chr2	1388832	1393901
	Chr1	10382584	10383371		Chr2	10678457	10679017		Chr2	1580203	1581256		Chr1	11064456	11067139		Chr2	7232311	7237513
	Chr1	10506501	10507368		Chr2	12149433	12150234		Chr2	16625761	16626817		Chr1	11064456	11067139		Chr2	5600343	5605594
	Chr1	10567972	10569320		Chr2	8436775	8437332		Chr2	2265433	2266486		Chr1	23240232	23242673		Chr2	532333	537391
	Chr1	10602557	10604986		Chr2	14290092	14290631		Chr2	17545764	17546812		Chr1	6009292	6014092		Chr2	8269647	8274939
	Chr1	10623650	10624994		Chr2	7861125	7861659		Chr2	9038477	9039545		Chr1	6009292	6014092		Chr2	8269647	8274939
	Chr1	10652085	10653331		Chr2	16030119	16030650		Chr2	5503886	5505003		Chr1	16853329	16858040		Chr3	11055896	11062842
	Chr1	10654143	10654665		Chr2	1990560	1991386		Chr2	932541	933984		Chr1	22100644	22105329		Chr3	9011213	9017190
	Chr1	10696714	10701584		Chr2	15273637	15274176		Chr2	2030996	2032040		Chr1	16421133	16424144		Chr3	10970102	10976062
	Chr1	10802426	10803341		Chr2	8908186	8909006		Chr2	14951837	14952861		Chr1	16421133	16424144		Chr3	15339111	15347116
	Chr1	10852075	10852625		Chr2	1642169	1642711		Chr2	8453812	8454824		Chr1	6273523	6276128		Chr3	5277962	5286732
	Chr1	10852626	10853287		Chr2	5393577	5394399		Chr2	4796349	4797386		Chr1	6273523	6276128		Chr3	5277962	5286732
	Chr1	10866669	10867813		Chr2	1412404	1413298		Chr2	7418893	7419975		Chr1	6273523	6276128		Chr3	5277962	5286732
	Chr1	10867089	10867731		Chr2	10470389	10471317		Chr2	9496052	9497136		Chr1	2531451	2534781		Chr3	14690344	14701784
	Chr1	10982120	10982866		Chr2	8200781	8201687		Chr2	6900959	6902038		Chr1	2531451	2534781		Chr3	10917704	10922777
	Chr1	10982871	10983613		Chr2	2843831	2844755		Chr2	5904641	5905727		Chr1	16488881	16491738		Chr3	10917704	10922777
	Chr1	11064456	11067139		Chr2	8854332	8855262		Chr3	9256634	9258148		Chr2	2932277	2934860		Chr3	1555420	1560680
	Chr1	11067140	11067658		Chr2	10367215	10368137		Chr3	2259576	2260955		Chr2	18652626	18655464		Chr3	16100857	16106213
	Chr1	11125041	11125699		Chr2	2025006	2025915		Chr3	9576220	9577646		Chr2	2174523	2177129		Chr3	15271726	15277050
	Chr1	11125700	11126411		Chr2	6790148	6791016		Chr3	16553082	16554521		Chr2	5057720	5059782		Chr3	14773640	14783116
	Chr1	11280217	11285438		Chr2	69926	70795		Chr3	17033255	17034688		Chr2	6728745	6730806		Chr3	3807367	3812643
	Chr1	11302246	11310368		Chr2	9854081	9854945		Chr3	11071421	11072816		Chr2	1458342	1461262		Chr3	3807367	3812643
	Chr1	11491440	11492840		Chr2	9584492	9585378		Chr3	10463419	10465097		Chr2	8379698	8381945		Chr3	17978745	17983946
	Chr1	11492841	11493647		Chr2	10351573	10352460		Chr3	9987076	9988701		Chr2	2539101	2541787		Chr3	14272908	14285452
	Chr1	11617703	11619060		Chr2	686375	687108		Chr3	15618675	15619874		Chr2	5709609	5713343		Chr4	5485146	5494752
	Chr1	11636077	11637042		Chr2	7298005	7298654		Chr3	6706028	6707225		Chr2	9057251	9059623		Chr4	5485146	5494752
	Chr1	11732355	11732947		Chr2	4623545	4624517		Chr3	9899561	9900766		Chr2	2844765	2849743		Chr4	10508742	10514094
	Chr1	11735186	11737670		Chr2	582619	583282		Chr3	16470340	16471533		Chr2	2739759	2743696		Chr4	5520207	5536230
	Chr1	11752261	11755077		Chr2	10677491	10678139		Chr3	5981917	5983138		Chr2	1862443	1865975		Chr4	14280183	14288304
	Chr1	11782553	11783489		Chr2	5506585	5507218		Chr3	5651129	5652442		Chr2	6922611	6926139		Chr4	4809779	4821017
	Chr1	11789450	11794079		Chr2	1584873	1585622		Chr3	5163322	5164532		Chr2	6922611	6926139		Chr4	11363560	11368654
	Chr1	11803471	11804092		Chr2	70796	71407		Chr3	12348429	12350350		Chr2	8075979	8078202		Chr4	4209027	4214178
	Chr1	11805615	11806799		Chr2	15884475	15885121		Chr3	16301843	16303089		Chr2	5631379	5636319		Chr4	2643338	2648818
	Chr1	11817658	11818739		Chr2	808411	809054		Chr3	15779478	15780631		Chr2	3107315	3112019		Chr5	14158313	14172169
	Chr1	11826497	11827062		Chr2	9644500	9645243		Chr3	17202778	17203930		Chr2	4792834	4795747		Chr5	14083274	14088529
	Chr1	11834923	11836068		Chr2	17205774	17206413		Chr3	11088992	11090176		Chr3	16669866	16672298		Chr5	3904621	3909856
	Chr1	11935690	11936470		Chr2	5053732	5054374		Chr3	156971	158138		Chr3	14064626	14067617		Chr5	6433631	6438777
	Chr1	11979621	11982674		Chr2	5053732	5054374		Chr3	156971	158138		Chr3	22112933	22115657		Chr5	10350376	10356320
	Chr1	11983130	11984131		Chr2	313912	314625		Chr3	11749952	11751261		Chr3	12659604	12662089		Chr5	10350376	10356320
	Chr1	12021255	12021839		Chr2	767569	768258		Chr3	17985638	17986901		Chr3	17060733	17063206		Chr5	18933096	18938943
	Chr1	12041783	12042411		Chr2	1522003	1522716		Chr3	5929425	5930702		Chr3	11360138	11362878		Chr5	7027973	7037665
	Chr1	12062736	12064146		Chr2	8455189	8455884		Chr3	5929425	5930702		Chr3	11360138	11362878		Chr5	64772	71199
	Chr1	12143179	12144154		Chr2	9424485	9425181		Chr3	3837726	3838970		Chr3	10977979	10980184		Chr5	64772	71199
	Chr1	12183387	12184077		Chr2	11643281	11644011		Chr3	17050192	17051429		Chr3	20304981	20309967		Chr5	17893551	17901550
	Chr1	12183406	12184060		Chr2	8907408	8908078		Chr3	10065947	10067204		Chr3	20304981	20309967		Chr1	8927732	8933058
	Chr1	12185282	12186309		Chr2	1989190	1989871		Chr3	17729459	17731271		Chr3	16600733	16604312		Chr1	8927732	8933058
	Chr1	12246436	12247641		Chr2	14653181	14653863		Chr3	5864618	5865854		Chr3	16809185	16814151		Chr5	2257475	2262962
	Chr1	12333649	12338510		Chr2	6044347	6045023		Chr3	12669318	12670623		Chr3	12663165	12666581		Chr5	2257475	2262962
	Chr1	12339286	12340088		Chr2	6561472	6562148		Chr3	10373032	10374065		Chr3	4929015	4932433
	Chr1	12425690	12426661		Chr2	8575092	8575771		Chr3	17984181	17985366		Chr3	11116002	11120737
	Chr1	12439397	12440220		Chr2	2212827	2213371		Chr3	12559239	12560276		Chr3	23203577	23207484
	Chr1	12440221	12440987		Chr2	2178034	2178820		Chr3	7192833	7193937		Chr3	23203577	23207484
	Chr1	12482331	12483086		Chr2	10433808	10434595		Chr3	985157	986226		Chr3	9236767	9240922
	Chr1	12483560	12484873		Chr2	4326004	4326583		Chr3	14095731	14097279		Chr3	13476641	13480691
	Chr1	12529448	12530215		Chr2	9056411	9056993		Chr3	18948268	18949362		Chr3	10006154	10008498
	Chr1	12651410	12651914		Chr2	12622297	12622875		Chr3	7981054	7982069		Chr4	7422109	7424541
	Chr1	12738313	12740004		Chr2	1464641	1465329		Chr3	16574582	16575656		Chr4	2527506	2530307
	Chr1	12966328	12966899		Chr2	4144491	4145069		Chr3	21967288	21968306		Chr4	860921	864078
	Chr1	12976099	12976857		Chr2	4869618	4870414		Chr3	14650511	14651558		Chr4	10269633	10271678
	Chr1	13069750	13070698		Chr2	14008868	14009432		Chr3	18652085	18653144		Chr4	2286691	2288784
	Chr1	13075527	13076517		Chr2	2273549	2274110		Chr3	18652085	18653144		Chr4	5611200	5613631
	Chr1	13127113	13128014		Chr2	2761417	2762216		Chr3	3664653	3665709		Chr4	5398802	5402984
	Chr1	13128072	13129685		Chr2	7247566	7248142		Chr4	11380643	11382073		Chr4	4645310	4648816
	Chr1	13149788	13150516		Chr2	7326587	7327377		Chr4	5138388	5139965		Chr4	11676468	11681340
	Chr1	13150517	13151142		Chr2	2063331	2063901		Chr4	15965	17542		Chr4	11676468	11681340
	Chr1	13155542	13156291		Chr2	10292009	10292646		Chr4	6624816	6626388		Chr4	2796448	2800705
	Chr1	13187278	13192359		Chr2	1002169	1002784		Chr4	4822547	4824153		Chr4	2549584	2552876
	Chr1	13263763	13276157		Chr2	8402827	8403588		Chr4	5835598	5837090		Chr5	22510693	22512918
	Chr1	13529503	13530335		Chr2	10467649	10468258		Chr4	8782112	8783572		Chr5	16908096	16910311
	Chr1	13559846	13564825		Chr2	6237869	6238487		Chr4	1141844	1143301		Chr5	7152939	7155014
	Chr1	13850479	13851106		Chr2	4807338	4807961		Chr4	5136512	5138048		Chr5	16560410	16562449
	Chr1	13851265	13852459		Chr2	1017219	1017843		Chr4	4307637	4309187		Chr5	24343853	24345901
	Chr1	13894164	13894969		Chr2	1709979	1710601		Chr4	8294944	8296098		Chr5	13925974	13930453
	Chr1	13894971	13895793		Chr2	8956954	8957576		Chr4	1233641	1234831		Chr5	6348990	6351608
	Chr1	13896397	13897259		Chr2	5645996	5646595		Chr4	5437217	5438404		Chr5	21832304	21834623
	Chr1	14186049	14186771		Chr2	6730847	6731440		Chr4	17501120	17502316		Chr5	10725637	10728091
	Chr1	14187558	14188058		Chr2	16467347	16467949		Chr4	184375	185512		Chr5	18142156	18146898
	Chr1	14188117	14193130		Chr2	9852041	9853022		Chr4	8633209	8634456		Chr5	18142156	18146898
	Chr1	15888575	15889438		Chr2	2074041	2075017		Chr4	10648123	10649338		Chr5	15646197	15651173
	Chr1	15890200	15891183		Chr2	2319959	2320939		Chr4	9146067	9147273		Chr5	22002017	22006884
	Chr1	15905244	15906048		Chr2	7296608	7297567		Chr4	6242828	6244032		Chr5	1485677	1489443
	Chr1	15984830	15985729		Chr2	7457934	7458896		Chr4	10632487	10633716		Chr5	1485677	1489443
	Chr1	16418840	16420085		Chr2	11101222	11102213		Chr4	16729212	16730433		Chr5	17740219	17742501
	Chr1	16421133	16424144		Chr2	6892215	6893183		Chr4	7554327	7556090		Chr5	20278780	20282135
	Chr1	16431065	16431612		Chr2	6274102	6275053		Chr4	11370989	11372669		Chr5	5707712	5710613
	Chr1	16453797	16455250		Chr2	1112953	1113888		Chr4	7525028	7526697		Chr5	6632968	6635341
	Chr1	16488881	16491738		Chr2	7883751	7884704		Chr4	1565686	1567408		Chr5	14094421	14097965
	Chr1	16626037	16637234		Chr3	5642949	5643530		Chr4	1565686	1567408		Chr5	10061001	10064751
	Chr1	16667243	16667899		Chr3	10262504	10263076		Chr4	5845121	5846835		Chr5	14036303	14040000
	Chr1	16710551	16711103		Chr3	10375323	10375827		Chr4	1230735	1231738		Chr2	6351159	6353252
	Chr1	16742379	16751122		Chr3	19959134	19959641		Chr4	1487367	1488605		Chr2	13223059	13227048
	Chr1	16789888	16790639		Chr3	2772912	2773424		Chr4	1487367	1488605		Chr5	9641505	9643917
	Chr1	16842837	16844613		Chr3	2772912	2773424		Chr4	664012	665069
	Chr1	16853329	16858040		Chr3	6073211	6073718		Chr4	10999801	11000869
	Chr1	16925673	16926338		Chr3	20629317	20629826		Chr4	5790779	5791870
	Chr1	16986042	16987141		Chr3	15294942	15295804		Chr4	2604628	2605726
	Chr1	16987616	16990441		Chr3	17531512	17532377		Chr4	5671241	5672269
	Chr1	16987716	16989955		Chr3	11078905	11079437		Chr4	6549540	6550621
	Chr1	17015858	17016880		Chr3	16405293	16406121		Chr4	5618042	5619125
	Chr1	17017022	17018618		Chr3	17640547	17641085		Chr4	2470299	2471300
	Chr1	17035033	17050039		Chr3	12558292	12559109		Chr4	2321011	2322025
	Chr1	17035065	17050021		Chr3	16539300	16539821		Chr5	12685005	12686216
	Chr1	17122324	17122889		Chr3	17565815	17566336		Chr5	18171286	18172315
	Chr1	17151789	17152908		Chr3	21694105	21694936		Chr5	14573442	14574452
	Chr1	17240901	17241909		Chr3	20353390	20353918		Chr5	490080	491096
	Chr1	17267055	17268180		Chr3	19219284	19219812		Chr5	12566843	12568021
	Chr1	17349654	17350231		Chr3	11743225	11744059		Chr5	16178388	16179572
	Chr1	17654583	17655619		Chr3	19133501	19134414		Chr5	393552	394732
	Chr1	17685244	17686629		Chr3	10008501	10009413		Chr5	20855632	20856783
	Chr1	17873230	17873851		Chr3	2138405	2139312		Chr5	20639226	20640383
	Chr1	18002177	18007370		Chr3	17310913	17311829		Chr5	8769450	8770675
	Chr1	18033271	18034112		Chr3	4977260	4978185		Chr5	25468578	25469816
	Chr1	18096129	18096961		Chr3	16540351	16541285		Chr5	16108824	16110017
	Chr1	18189520	18190373		Chr3	7897536	7898460		Chr5	7604820	7605898
	Chr1	18225401	18225974		Chr3	7318380	7319304		Chr5	13472832	13473901
	Chr1	18270464	18271031		Chr3	4494522	4495163		Chr5	8809340	8810410
	Chr1	18281070	18282150		Chr3	3873755	3874629		Chr5	8313098	8314181
	Chr1	18302777	18304452		Chr3	11800780	11801357		Chr5	2071545	2072640
	Chr1	18320670	18321177		Chr3	18811213	18812091		Chr5	19910477	19911610
	Chr1	18324372	18326405		Chr3	8328599	8329494		Chr5	10724493	10725611
	Chr1	18414725	18415296		Chr3	19533230	19533871		Chr5	3903107	3904246
	Chr1	18643654	18644174		Chr3	6100878	6101623		Chr5	19912439	19913546
	Chr1	18647731	18648596		Chr3	16549968	16550605		Chr5	19438985	19440096
	Chr1	18805547	18806423		Chr3	5495820	5496457		Chr5	6913795	6915667
	Chr1	18806508	18807394		Chr3	12243189	12243827		Chr5	7041125	7042955
	Chr1	18873930	18874466		Chr3	15344560	15345202		Chr5	9442596	9444440
	Chr1	18971500	18972199		Chr3	17397021	17397647		Chr5	24942028	24943968
	Chr1	18982387	18983645		Chr3	3742748	3743368		Chr5	9638933	9640878
	Chr1	19330143	19330778		Chr3	7341947	7342567		Chr5	24818770	24820162
	Chr1	19336306	19345618		Chr3	12457389	12458153		Chr5	7821796	7823160
	Chr1	19352908	19353478		Chr3	17141138	17141771		Chr5	1180386	1181904
	Chr1	19353479	19354354		Chr3	11739407	11740037		Chr5	14625614	14627128
	Chr1	19374609	19380747		Chr3	14233434	14234124		Chr5	15972493	15973914
	Chr1	19380995	19381516		Chr3	18850417	18851097		Chr5	9686109	9687387
	Chr1	19426504	19427034		Chr3	11141519	11142228		Chr5	9321773	9323049
	Chr1	19429180	19430131		Chr3	10883376	10884081		Chr5	10633968	10635312
	Chr1	19654971	19655716		Chr3	9739656	9740357		Chr5	9324743	9326092
	Chr1	19665949	19666845		Chr3	18457586	18458243		Chr5	15623983	15625333
	Chr1	19699857	19700363		Chr3	18458244	18458917		Chr5	12569605	12570941
	Chr1	19703141	19704372		Chr3	8883340	8884016		Chr5	19174544	19175868
	Chr1	19704373	19705615		Chr3	17047951	17048625		Chr5	26258474	26260064
	Chr1	19741472	19742139		Chr3	18243803	18244528		Chr5	3005871	3007470
	Chr1	19808116	19810029		Chr3	18295638	18296205		Chr5	22021051	22022597
	Chr1	19876248	19877040		Chr3	19085515	19086280		Chr4	2018788	2019963
	Chr1	19931970	19934270		Chr3	10666364	10666944		Chr5	10632241	10633944
	Chr1	20016267	20016860		Chr3	9327694	9328269		Chr1	28912664	28913670
	Chr1	20153634	20154352		Chr3	19436874	19437446		Chr1	22562685	22563702
	Chr1	20174321	20175287		Chr3	21130158	21130711		Chr1	3771003	3772133
	Chr1	20188086	20188762		Chr3	17984422	17984975		Chr1	9915357	9916480
	Chr1	20397885	20399270		Chr3	16498552	16499159		Chr1	28280132	28281255
	Chr1	20423239	20423739		Chr3	11026015	11026787		Chr1	9125777	9126902
	Chr1	20465029	20466693		Chr3	17396405	17397020		Chr1	9304765	9305904
	Chr1	20465427	20466401		Chr3	16357473	16358092		Chr1	23281603	23282774
	Chr1	20466775	20468318		Chr3	15358956	15359569		Chr1	11805615	11806799
	Chr1	20468319	20469929		Chr3	1602086	1602670		Chr1	4093294	4094494
	Chr1	20696828	20697332		Chr3	6430942	6431721		Chr1	3497680	3498873
	Chr1	20709456	20711250		Chr3	15895506	15896087		Chr1	3497680	3498873
	Chr1	20795646	20796157		Chr3	15270935	15271719		Chr1	3497680	3498873
	Chr1	20979423	20980832		Chr3	9575237	9575819		Chr1	5958628	5959682
	Chr1	21066910	21067588		Chr3	5865855	5866442		Chr1	1976110	1977174
	Chr1	21126579	21127989		Chr3	9740642	9741415		Chr1	16986042	16987141
	Chr1	21127990	21128869		Chr3	17928967	17929554		Chr1	11817658	11818739
	Chr1	21374954	21375503		Chr3	4752111	4753096		Chr1	6587128	6588246
	Chr1	21602974	21604616		Chr3	4752111	4753096		Chr1	7833186	7834254
	Chr1	21636862	21637408		Chr3	11093560	11094554		Chr1	18281070	18282150
	Chr1	21637419	21638230		Chr4	7687714	7688589		Chr1	9000001	9001095
	Chr1	21738689	21740552		Chr4	13656882	13657805		Chr1	28332972	28334063
	Chr1	21872179	21872788		Chr4	6880119	6880731		Chr1	3825781	3827697
	Chr1	21872791	21873779		Chr4	6830824	6831757		Chr1	3825781	3827697
	Chr1	21918286	21919763		Chr4	6482765	6483693		Chr1	12062736	12064146
	Chr1	21918430	21918995		Chr4	1480681	1481576		Chr1	21126579	21127989
	Chr1	21946201	21947011		Chr4	10870781	10871688		Chr1	1613272	1614662
	Chr1	21977156	21977749		Chr4	5649125	5649904		Chr1	1613272	1614662
	Chr1	22100644	22105329		Chr4	6331946	6332854		Chr1	1613272	1614662
	Chr1	22111959	22112753		Chr4	2388223	2388831		Chr1	9572801	9574191
	Chr1	22112754	22113280		Chr4	7443634	7444600		Chr1	17685244	17686629
	Chr1	22165044	22166347		Chr4	7245315	7246069		Chr1	3073227	3075036
	Chr1	22562685	22563702		Chr4	13903039	13903681		Chr1	6403764	6405272
	Chr1	22592372	22593721		Chr4	10525492	10526464		Chr1	16453797	16455250
	Chr1	22620537	22627023		Chr4	2552877	2553516		Chr1	9585965	9587249
	Chr1	22693955	22699336		Chr4	7519972	7520914		Chr1	10652085	10653331
	Chr1	22778334	22779072		Chr4	5408352	5409300		Chr1	16418840	16420085
	Chr1	22818100	22818880		Chr4	1514070	1514695		Chr1	18982387	18983645
	Chr1	22846336	22854554		Chr4	7179128	7179748		Chr1	10623650	10624994
	Chr1	23118240	23123214		Chr4	1088877	1089644		Chr1	24126180	24127536
	Chr1	23141285	23141922		Chr4	5837985	5838747		Chr1	22592372	22593721
	Chr1	23240232	23242673		Chr4	16782720	16783573		Chr1	12483560	12484873
	Chr1	23247299	23247895		Chr4	2397861	2398704		Chr1	22165044	22166347
	Chr1	23281603	23282774		Chr4	1485996	1486549		Chr1	4706567	4708276
	Chr1	23321142	23322080		Chr4	13887249	13888108		Chr1	16842837	16844613
	Chr1	23430955	23431563		Chr4	6581050	6581638		Chr1	20709456	20711250
	Chr1	23613636	23614326		Chr4	6952620	6953479		Chr1	6233921	6235720
	Chr1	23856454	23857302		Chr4	2464308	2464847		Chr1	20466775	20468318
	Chr1	23885397	23885978		Chr4	6102121	6102666		Chr1	20466775	20468318
	Chr1	24101683	24102799		Chr4	5929504	5930077		Chr1	12738313	12740004
	Chr1	24119700	24120486		Chr4	474383	475199		Chr1	781194	782748
	Chr1	24126180	24127536		Chr4	8749997	8750567		Chr1	20468319	20469929
	Chr1	24484054	24484762		Chr4	1568875	1569443		Chr1	20468319	20469929
	Chr1	24576063	24576584		Chr4	1091113	1091942		Chr1	6198003	6199615
	Chr1	24604958	24605560		Chr4	1026487	1026997		Chr1	20465029	20466693
	Chr1	24645066	24646116		Chr4	6688783	6689667		Chr1	10866669	10867813
	Chr1	24704182	24704959		Chr4	12094422	12095377		Chr2	2602448	2603916
	Chr1	24704987	24706028		Chr4	2795183	2796070		Chr2	7206513	7207947
	Chr1	24831579	24832636		Chr4	11368906	11369421		Chr2	12979089	12980532
	Chr1	24837368	24838286		Chr4	17638267	17638779		Chr2	2852648	2854329
	Chr1	24955986	24956637		Chr4	5143518	5144031		Chr2	14840799	14842135
	Chr1	25034157	25035674		Chr4	1140509	1141010		Chr2	4589569	4590885
	Chr1	25159043	25163500		Chr4	79007	79898		Chr2	113475	114791
	Chr1	25331531	25332083		Chr4	7089369	7089906		Chr2	4326584	4327964
	Chr1	25400479	25401474		Chr4	5992065	5992690		Chr2	4077882	4079717
	Chr1	25639635	25641849		Chr4	5144109	5144778		Chr2	9311659	9313019
	Chr1	25675397	25675909		Chr4	14750236	14750900		Chr2	4023318	4024951
	Chr1	26030839	26036307		Chr4	2793619	2794283		Chr2	374589	376262
	Chr1	26139772	26140541		Chr4	521767	522390		Chr2	10441388	10443044
	Chr1	26358799	26360000		Chr4	7419747	7420455		Chr2	2732865	2734487
	Chr1	26366603	26371673		Chr4	7773815	7774468		Chr2	6690900	6692436
	Chr1	26551492	26552205		Chr4	11379873	11380587		Chr2	12876125	12877655
	Chr1	27428715	27429293		Chr4	14530698	14531436		Chr2	17417947	17419429
	Chr1	27675433	27676136		Chr4	4643049	4643704		Chr2	1607837	1609415
	Chr1	27859648	27860967		Chr4	5701473	5702468		Chr2	4021315	4022871
	Chr1	28280132	28281255		Chr4	14333492	14334241		Chr2	4590886	4592446
	Chr1	28332972	28334063		Chr4	14911696	14912675		Chr2	2021016	2022558
	Chr1	28398201	28399052		Chr5	10473593	10474296		Chr2	17008780	17009940
	Chr1	28526861	28527671		Chr5	16160285	16161266		Chr2	1037743	1038911
	Chr1	28703306	28704766		Chr5	13774192	13775153		Chr2	11373154	11374305
	Chr1	28912664	28913670		Chr5	22491501	22492416		Chr2	11100068	11101221
	Chr1	29313050	29313596		Chr5	15408569	15409487		Chr2	10749223	10750409
	Chr1	29474555	29479485		Chr5	8216175	8217121		Chr2	1599600	1600791
	Chr1	29588228	29588826		Chr5	19024212	19025157		Chr2	6808846	6809950
	Chr1	29983277	29984079		Chr5	19822935	19823876		Chr2	254343	255444
	Chr2	52644	58681		Chr5	18669044	18669971		Chr2	17005420	17006521
	Chr2	69926	70795		Chr5	16196037	16196973		Chr2	2058045	2059187
	Chr2	70796	71407		Chr5	15143605	15144360		Chr2	2019785	2020922
	Chr2	113475	114791		Chr5	25470369	25471129		Chr2	2019785	2020922
	Chr2	215551	216683		Chr5	9487452	9488211		Chr2	665570	666688
	Chr2	238125	238646		Chr5	15791107	15791849		Chr2	1463246	1464538
	Chr2	254343	255444		Chr5	8702010	8702759		Chr2	16379576	16380843
	Chr2	292731	293916		Chr5	17726227	17727004		Chr2	5048488	5049699
	Chr2	313912	314625		Chr5	17209858	17210641		Chr2	9310250	9311451
	Chr2	314627	315282		Chr5	16159404	16160186		Chr2	5802832	5804028
	Chr2	374589	376262		Chr5	10632794	10633563		Chr2	8554836	8556037
	Chr2	376596	377257		Chr5	22534329	22535096		Chr2	1108692	1110025
	Chr2	384450	385195		Chr5	8204502	8205214		Chr2	2299822	2301751
	Chr2	401158	402774		Chr5	13241280	13241992		Chr2	1083519	1085478
	Chr2	514681	517194		Chr5	5593871	5594588		Chr2	7148309	7150197
	Chr2	532333	537391		Chr5	16681586	16682292		Chr2	10707222	10709131
	Chr2	566757	582571		Chr5	8451572	8452280		Chr2	6395887	6397659
	Chr2	582619	583282		Chr5	21668187	21668894		Chr2	6395887	6397659
	Chr2	625443	626028		Chr5	14627233	14627966		Chr2	8028046	8029825
	Chr2	636879	637401		Chr5	14645935	14646671		Chr2	2065089	2066950
	Chr2	639521	640379		Chr5	15917930	15918650		Chr2	2065089	2066950
	Chr2	665570	666688		Chr5	18538976	18539699		Chr2	5509344	5511171
	Chr2	675552	676681		Chr5	14623775	14624631		Chr2	1681392	1682511
	Chr2	685814	687238		Chr5	9470415	9471278		Chr2	2261420	2262466
	Chr2	686375	687108		Chr5	1981368	1982222		Chr2	9349362	9350577
	Chr2	736575	737445		Chr5	8362558	8363404		Chr2	16957051	16958075
	Chr2	741782	742363		Chr5	19493778	19494625		Chr2	13024831	13025838
	Chr2	767569	768258		Chr5	5854205	5855060		Chr2	5589103	5590107
	Chr2	786196	787440		Chr5	16387698	16388592		Chr2	5023017	5024024
	Chr2	794450	795647		Chr5	14984861	14985741		Chr2	8451163	8452180
	Chr2	808411	809054		Chr5	12547599	12548470		Chr2	2734488	2735506
	Chr2	811547	812862		Chr5	9279625	9280496		Chr2	2209832	2210864
	Chr2	878375	878980		Chr5	18147312	18148181		Chr2	7420749	7421827
	Chr2	893850	894388		Chr5	14754521	14755395		Chr2	1048321	1049410
	Chr2	932541	933984		Chr5	6398674	6399464		Chr2	11867186	11868276
	Chr2	963608	964191		Chr5	15779045	15779840		Chr2	7659044	7660116
	Chr2	998623	999137		Chr5	15113468	15114305		Chr2	2211063	2212136
	Chr2	1002169	1002784		Chr5	14280683	14281506		Chr2	1580003	1581490
	Chr2	1017219	1017843		Chr5	7643929	7644545		Chr3	15896903	15898389
	Chr2	1037743	1038911		Chr5	8155764	8156685		Chr3	10457033	10458506
	Chr2	1038912	1039436		Chr5	19101560	19102178		Chr3	17044447	17045997
	Chr2	1047702	1048320		Chr5	14612588	14613207		Chr3	8596061	8597767
	Chr2	1048321	1049410		Chr5	14610717	14611593		Chr3	16099169	16100856
	Chr2	1065927	1066514		Chr5	7344748	7345294		Chr3	16156563	16158214
	Chr2	1079017	1079594		Chr5	9876499	9877104		Chr3	17393358	17395137
	Chr2	1083519	1085478		Chr5	18420199	18420745		Chr3	14912144	14913339
	Chr2	1108692	1110025		Chr5	14994454	14995067		Chr3	6716975	6718178
	Chr2	1112953	1113888		Chr5	10779451	10780060		Chr3	17141846	17143390
	Chr2	1154664	1155913		Chr5	24585979	24586617		Chr3	8872329	8873544
	Chr2	1264727	1271840		Chr5	24117962	24118598		Chr3	10938648	10939801
	Chr2	1312743	1314083		Chr5	17146926	17147563		Chr3	11207842	11208997
	Chr2	1388832	1393901		Chr5	19966162	19966791		Chr3	10313643	10314813
	Chr2	1393902	1395151		Chr5	9472123	9472654		Chr3	18544269	18545573
	Chr2	1412404	1413298		Chr5	8748927	8749501		Chr3	11079438	11080737
	Chr2	1413821	1414493		Chr5	1812052	1812602		Chr3	8343660	8345642
	Chr2	1423165	1425427		Chr5	4936963	4937566		Chr3	8343660	8345642
	Chr2	1441857	1442963		Chr5	9013221	9013767		Chr3	6728213	6729552
	Chr2	1457071	1458341		Chr5	24448804	24449405		Chr3	14064914	14066181
	Chr2	1458342	1461262		Chr5	5625060	5625653		Chr3	13044777	13046686
	Chr2	1463246	1464538		Chr5	3895558	3896437		Chr3	8230715	8232502
	Chr2	1464641	1465329		Chr5	8374970	8375660		Chr3	18885614	18887516
	Chr2	1503834	1505066		Chr5	20631775	20632292		Chr3	16737596	16738663
	Chr2	1505385	1513550		Chr5	25048858	25049375		Chr3	11157911	11158915
	Chr2	1522003	1522716		Chr5	1501774	1502465		Chr3	11602485	11603489
	Chr2	1572660	1573502		Chr5	19743369	19744026		Chr3	8209851	8210857
	Chr2	1580003	1581490		Chr5	23282546	23283063		Chr3	20233539	20234626
	Chr2	1580203	1581256		Chr5	5592793	5593451		Chr3	19754077	19755173
	Chr2	1584873	1585622		Chr5	25360664	25361439		Chr3	4796011	4797014
	Chr2	1599600	1600791		Chr5	15913073	15913745		Chr3	19142387	19143433
	Chr2	1607033	1607740		Chr5	16587823	16588504		Chr3	11392706	11393765
	Chr2	1607837	1609415		Chr5	7829783	7830291		Chr3	17355557	17356679
	Chr2	1642169	1642711		Chr5	8404443	8405117		Chr3	11714167	11715294
	Chr2	1662850	1663424		Chr5	26290110	26290620		Chr4	7101226	7102618
	Chr2	1665233	1668533		Chr5	8374285	8374969		Chr4	7425564	7427007
	Chr2	1673605	1676235		Chr5	9260789	9261456		Chr4	12261932	12263275
	Chr2	1680470	1681002		Chr5	15152121	15152631		Chr4	2733589	2734901
	Chr2	1681392	1682511		Chr5	24448645	24449557		Chr4	17213048	17214415
	Chr2	1684821	1686097		Chr5	3750498	3751194		Chr4	8882426	8883800
	Chr2	1691344	1692561		Chr5	4936863	4937774		Chr4	8819991	8821573
	Chr2	1701489	1702188		Chr5	23240675	23241308		Chr4	593747	595309
	Chr2	1709979	1710601		Chr5	17890064	17890586		Chr4	5934829	5936446
	Chr2	1729996	1731644		Chr5	15000779	15001475		Chr4	6209999	6211623
	Chr2	1740839	1741399		Chr5	15580912	15581608		Chr4	8783865	8785474
	Chr2	1741426	1757083		Chr5	8314182	8314823		Chr4	5669703	5671168
	Chr2	1757634	1758395		Chr5	17002870	17003512		Chr4	3766820	3768072
	Chr2	1758540	1766569		Chr5	2289070	2289711		Chr4	7011697	7012856
	Chr2	1781546	1786791		Chr5	15755156	15755849		Chr4	5933675	5934828
	Chr2	1862443	1865975		Chr5	5217640	5218293		Chr4	7470758	7471932
	Chr2	1902752	1903923		Chr3	525370	526255		Chr4	14978036	14979213
	Chr2	1987723	1989017		Chr1	16431065	16431612		Chr4	5932549	5933674
	Chr2	1989190	1989871		Chr1	21872791	21873779		Chr4	16054514	16055641
	Chr2	1990560	1991386		Chr1	13075527	13076517		Chr4	7300396	7301656
	Chr2	2019785	2020922		Chr1	25400479	25401474		Chr4	66450	67743
	Chr2	2021016	2022558		Chr1	10802426	10803341		Chr4	9687709	9688988
	Chr2	2025006	2025915		Chr1	257710	258629		Chr4	15922833	15924043
	Chr2	2030996	2032040		Chr1	7761201	7762110		Chr4	15922833	15924043
	Chr2	2041964	2054217		Chr1	696447	697372		Chr4	10747964	10749188
	Chr2	2058045	2059187		Chr1	19429180	19430131		Chr4	18249665	18251647
	Chr2	2061856	2062677		Chr1	19429180	19430131		Chr4	3769194	3770841
	Chr2	2063331	2063901		Chr1	13069750	13070698		Chr4	7040603	7042300
	Chr2	2065089	2066950		Chr1	11782553	11783489		Chr4	8141781	8142803
	Chr2	2074041	2075017		Chr1	23321142	23322080		Chr4	3768131	3769181
	Chr2	2075339	2080607		Chr1	12976099	12976857		Chr4	5771969	5773031
	Chr2	2153889	2157853		Chr1	12440221	12440987		Chr4	10770732	10771757
	Chr2	2174523	2177129		Chr1	12440221	12440987		Chr4	4207161	4208174
	Chr2	2177130	2177749		Chr1	669867	670631		Chr4	6208485	6209577
	Chr2	2178034	2178820		Chr1	19352908	19353478		Chr4	11122742	11123827
	Chr2	2191057	2191575		Chr1	19654971	19655716		Chr4	18434274	18435359
	Chr2	2191576	2192438		Chr1	16789888	16790639		Chr4	2723308	2724404
	Chr2	2192501	2193620		Chr1	12482331	12483086		Chr4	6303442	6304518
	Chr2	2209832	2210864		Chr1	12529448	12530215		Chr5	8722405	8723471
	Chr2	2211063	2212136		Chr1	11935690	11936470		Chr5	8446240	8447266
	Chr2	2212827	2213371		Chr1	26139772	26140541		Chr5	10193496	10194533
	Chr2	2232387	2233113		Chr1	8538081	8538854		Chr5	13096918	13097930
	Chr2	2261420	2262466		Chr1	7505041	7505756		Chr5	16961287	16962328
	Chr2	2265433	2266486		Chr1	11125700	11126411		Chr5	8404055	8405675
	Chr2	2273549	2274110		Chr1	10982871	10983613		Chr5	15428649	15429823
	Chr2	2274203	2280054		Chr1	7975862	7976602		Chr5	5350957	5352117
	Chr2	2280055	2282263		Chr1	14186049	14186771		Chr5	15002082	15003226
	Chr2	2284531	2285293		Chr1	24119700	24120486		Chr5	15139395	15140550
	Chr2	2299822	2301751		Chr1	18189520	18190373		Chr5	5785178	5786394
	Chr2	2302461	2307173		Chr1	13896397	13897259		Chr5	20277086	20278156
	Chr2	2318504	2322143		Chr1	432995	433837		Chr5	6538496	6539564
	Chr2	2319959	2320939		Chr1	28398201	28399052		Chr5	18928066	18929471
	Chr2	2330078	2330578		Chr1	256075	256920		Chr5	22137036	22138086
	Chr2	2355598	2356098		Chr1	18647731	18648596		Chr5	14647141	14648201
	Chr2	2357948	2358545		Chr1	10506501	10507368		Chr5	16910315	16911409
	Chr2	2539101	2541787		Chr1	19353479	19354354		Chr5	9428892	9430016
	Chr2	2542617	2559353		Chr1	15905244	15906048		Chr5	23661755	23662856
	Chr2	2601871	2602447		Chr1	13894164	13894969		Chr5	12960450	12961547
	Chr2	2602448	2603916		Chr1	10382584	10383371		Chr5	14295647	14296757
	Chr2	2729902	2730706		Chr1	3925331	3926124		Chr5	16855738	16856861
	Chr2	2732865	2734487		Chr1	1275795	1276621		Chr5	11386012	11387274
	Chr2	2734488	2735506		Chr1	18096129	18096961		Chr5	19504736	19506670
	Chr2	2739759	2743696		Chr1	13529503	13530335		Chr5	7818034	7819050
	Chr2	2761417	2762216		Chr1	11492841	11493647		Chr5	24475199	24476590
	Chr2	2843831	2844755		Chr1	7786504	7787318		Chr5	12966769	12968156
	Chr2	2844765	2849743		Chr1	21637419	21638230		Chr5	17059193	17060601
	Chr2	2849744	2852332		Chr1	13894971	13895793		Chr5	15105645	15107012
	Chr2	2852648	2854329		Chr1	12183387	12184077		Chr5	15137453	15138822
	Chr2	2902330	2907117		Chr1	12021255	12021839		Chr5	19495551	19496983
	Chr2	2922388	2923829		Chr1	20016267	20016860		Chr5	13703432	13704886
	Chr2	2932277	2934860		Chr1	18270464	18271031		Chr5	22259547	22261012
	Chr2	2980029	2980789		Chr1	540417	540985		Chr5	14602464	14603754
	Chr2	2983860	2985105		Chr1	11826497	11827062		Chr5	13861309	13862577
	Chr2	2985784	2987306		Chr1	17122324	17122889		Chr5	20558575	20559918
	Chr2	3058063	3058583		Chr1	3547014	3547591		Chr5	9910299	9911640
	Chr2	3061229	3074307		Chr1	27428715	27429293		Chr5	15259489	15260791
	Chr2	3107315	3112019		Chr1	18414725	18415296		Chr5	19425890	19427193
	Chr2	3109915	3110725		Chr1	12966328	12966899		Chr5	20059830	20061632
	Chr2	3636370	3645326		Chr1	18225401	18225974		Chr5	5218900	5220422
	Chr2	3674408	3675400		Chr1	13127113	13128014		Chr5	2105861	2107449
	Chr2	3675405	3676269		Chr1	7132354	7132972		Chr5	15454017	15455706
	Chr2	3985410	3985993		Chr1	11803471	11804092		Chr5	19026401	19027770
	Chr2	3986485	4005114		Chr1	18805547	18806423		Chr2	4005995	4007044
	Chr2	4005636	4007377		Chr1	2986348	2986950
	Chr2	4005995	4007044		Chr1	10021369	10021965
	Chr2	4007517	4008741		Chr1	23430955	23431563
	Chr2	4021315	4022871		Chr1	25675397	25675909
	Chr2	4023318	4024951		Chr1	19699857	19700363
	Chr2	4027024	4045789		Chr1	18320670	18321177
	Chr2	4077882	4079717		Chr1	15888575	15889438
	Chr2	4120758	4121314		Chr1	15888575	15889438
	Chr2	4121360	4122247		Chr1	18643654	18644174
	Chr2	4144491	4145069		Chr1	10654143	10654665
	Chr2	4326004	4326583		Chr1	11067140	11067658
	Chr2	4326584	4327964		Chr1	3573163	3573682
	Chr2	4508417	4513686		Chr1	20696828	20697332
	Chr2	4522545	4524021		Chr1	6640487	6640989
	Chr2	4542381	4543115		Chr1	20423239	20423739
	Chr2	4545528	4547505		Chr1	10852075	10852625
	Chr2	4589569	4590885		Chr1	21636862	21637408
	Chr2	4590886	4592446		Chr1	21374954	21375503
	Chr2	4623545	4624517		Chr1	19426504	19427034
	Chr2	4792834	4795747		Chr1	4292790	4293327
	Chr2	4796349	4797386		Chr1	18873930	18874466
	Chr2	4807338	4807961		Chr1	10867089	10867731
	Chr2	4861229	4869425		Chr1	9902765	9903407
	Chr2	4869618	4870414		Chr1	3360626	3361316
	Chr2	5023017	5024024		Chr1	3360626	3361316
	Chr2	5040995	5048412		Chr1	23613636	23614326
	Chr2	5048488	5049699		Chr1	20188086	20188762
	Chr2	5053732	5054374		Chr1	12183406	12184060
	Chr2	5057720	5059782		Chr1	7852212	7852860
	Chr2	5080810	5081390		Chr1	10852626	10853287
	Chr2	5387019	5388592		Chr1	16925673	16926338
	Chr2	5393577	5394399		Chr1	18971500	18972199
	Chr2	5501965	5502507		Chr1	19741472	19742139
	Chr2	5503886	5505003		Chr2	3675405	3676269
	Chr2	5506585	5507218		Chr2	8040887	8041407
	Chr2	5509344	5511171		Chr2	11993118	11993984
	Chr2	5589103	5590107		Chr2	3058063	3058583
	Chr2	5591472	5592863		Chr2	8753965	8754480
	Chr2	5600343	5605594		Chr2	1572660	1573502
	Chr2	5610303	5612406		Chr2	6825696	6826525
	Chr2	5631379	5636319		Chr2	636879	637401
	Chr2	5645996	5646595		Chr2	8707614	8708149
	Chr2	5647517	5648363		Chr2	5647517	5648363
	Chr2	5709609	5713343		Chr2	12724687	12725201
	Chr2	5792231	5792781		Chr2	10181538	10182045
	Chr2	5798984	5799531		Chr2	5792231	5792781
	Chr2	5802832	5804028		Chr2	5941660	5942204
	Chr2	5904641	5905727		Chr2	4120758	4121314
	Chr2	5940207	5941108		Chr2	7594765	7595564
	Chr2	5941660	5942204		Chr2	2729902	2730706
	Chr2	5942388	5943522		Chr2	5501965	5502507
	Chr2	5944595	5945744		Chr2	2061856	2062677
	Chr2	5960275	5975813		Chr2	8008696	8009232
	Chr2	6003837	6004804		Chr2	10468259	10469079
	Chr2	6013682	6014631		Chr2	893850	894388
	Chr2	6044347	6045023		Chr2	12833205	12834104
	Chr2	6176922	6178229		Chr2	5940207	5941108
	Chr2	6179827	6180959		Chr2	10198690	10199558
	Chr2	6237869	6238487		Chr2	11119584	11120449
	Chr2	6274102	6275053		Chr2	2191576	2192438
	Chr2	6351159	6353252		Chr2	736575	737445
	Chr2	6395887	6397659		Chr2	4542381	4543115
	Chr2	6468806	6470844		Chr2	6498207	6498866
	Chr2	6497154	6497664		Chr2	376596	377257
	Chr2	6498207	6498866		Chr2	10144769	10145431
	Chr2	6524256	6533075		Chr2	314627	315282
	Chr2	6561472	6562148		Chr2	2232387	2233113
	Chr2	6690900	6692436		Chr2	10557819	10558547
	Chr2	6700893	6706745		Chr2	13480882	13481528
	Chr2	6728745	6730806		Chr2	384450	385195
	Chr2	6730847	6731440		Chr2	10278666	10279408
	Chr2	6766438	6772521		Chr2	2601871	2602447
	Chr2	6778862	6785573		Chr2	15130953	15131580
	Chr2	6790148	6791016		Chr2	14701313	14702080
	Chr2	6808846	6809950		Chr2	11508159	11508795
	Chr2	6825696	6826525		Chr2	1607033	1607740
	Chr2	6837289	6843328		Chr2	7595565	7596100
	Chr2	6870789	6871404		Chr2	15098140	15098837
	Chr2	6881261	6884610		Chr2	1701489	1702188
	Chr2	6892215	6893183		Chr2	1413821	1414493
	Chr2	6900959	6902038		Chr2	11663672	11664656
	Chr2	6922611	6926139		Chr2	17256002	17256671
	Chr2	7069464	7070960		Chr2	10842131	10842797
	Chr2	7070961	7072149		Chr2	8016808	8017528
	Chr2	7148309	7150197		Chr2	12812063	12812737
	Chr2	7206513	7207947		Chr2	12812063	12812737
	Chr2	7224084	7229124		Chr2	741782	742363
	Chr2	7232311	7237513		Chr2	5080810	5081390
	Chr2	7247566	7248142		Chr2	10255513	10256096
	Chr2	7278652	7279429		Chr2	3985410	3985993
	Chr2	7296608	7297567		Chr2	1079017	1079594
	Chr2	7298005	7298654		Chr2	963608	964191
	Chr2	7300023	7308043		Chr2	1065927	1066514
	Chr2	7326587	7327377		Chr2	625443	626028
	Chr2	7347549	7348692		Chr2	17486368	17487161
	Chr2	7350212	7351546		Chr2	1740839	1741399
	Chr2	7352543	7353315		Chr2	1662850	1663424
	Chr2	7418893	7419975		Chr2	7278652	7279429
	Chr2	7420749	7421827		Chr2	6870789	6871404
	Chr2	7454892	7456634		Chr2	11963579	11964336
	Chr2	7457934	7458896		Chr2	1757634	1758395
	Chr2	7526282	7527528		Chr2	2980029	2980789
	Chr2	7535956	7537244		Chr2	2284531	2285293
	Chr2	7594765	7595564		Chr2	9922601	9923495
	Chr2	7595565	7596100		Chr2	1047702	1048320
	Chr2	7659044	7660116		Chr2	7352543	7353315
	Chr2	7861125	7861659		Chr2	2357948	2358545
	Chr2	7881639	7883747		Chr2	10238929	10239533
	Chr2	7883751	7884704		Chr2	11066246	11066852
	Chr2	7886420	7887562		Chr2	878375	878980
	Chr2	7899776	7901147		Chr2	9484720	9485436
	Chr2	7959807	7961561		Chr2	5798984	5799531
	Chr2	8008696	8009232		Chr2	8029826	8030412
	Chr2	8016808	8017528		Chr2	4121360	4122247
	Chr2	8028046	8029825		Chr2	10469137	10470100
	Chr2	8029826	8030412		Chr2	8414402	8415089
	Chr2	8035386	8036872		Chr2	6003837	6004804
	Chr2	8040887	8041407		Chr2	3674408	3675400
	Chr2	8075979	8078202		Chr2	6013682	6014631
	Chr2	8156789	8157622		Chr2	14457372	14458307
	Chr2	8200781	8201687		Chr2	9419034	9419969
	Chr2	8269647	8274939		Chr3	22214774	22215278
	Chr2	8379698	8381945		Chr3	10860237	10860747
	Chr2	8402827	8403588		Chr3	11272701	11273207
	Chr2	8414402	8415089		Chr3	18518882	18519390
	Chr2	8436775	8437332		Chr3	8510116	8510650
	Chr2	8451163	8452180		Chr3	11360692	11361223
	Chr2	8453812	8454824		Chr3	9736152	9736695
	Chr2	8455189	8455884		Chr3	10200583	10201124
	Chr2	8554836	8556037		Chr3	21882627	21883496
	Chr2	8561844	8567009		Chr3	20726148	20727046
	Chr2	8575092	8575771		Chr3	22747219	22747905
	Chr2	8707614	8708149		Chr3	422486	423446
	Chr2	8708150	8710005		Chr3	16407578	16408500
	Chr2	8753965	8754480		Chr3	5590741	5591635
	Chr2	8854332	8855262		Chr3	1283138	1283991
	Chr2	8872130	8883513		Chr3	7291081	7291966
	Chr2	8883841	8885588		Chr3	7291081	7291966
	Chr2	8907408	8908078		Chr3	12353844	12354728
	Chr2	8908186	8909006		Chr3	15748980	15749864
	Chr2	8956954	8957576		Chr3	17147538	17148178
	Chr2	9038477	9039545		Chr3	16723025	16723678
	Chr2	9056411	9056993		Chr3	7040846	7041553
	Chr2	9057251	9059623		Chr3	2600864	2601601
	Chr2	9310250	9311451		Chr3	8220044	8220664
	Chr2	9311659	9313019		Chr3	15619877	15620628
	Chr2	9313146	9315252		Chr3	21266073	21266822
	Chr2	9349362	9350577		Chr3	9702880	9703562
	Chr2	9419034	9419969		Chr3	9428479	9429162
	Chr2	9424485	9425181		Chr3	11271686	11272375
	Chr2	9484720	9485436		Chr3	10933496	10934173
	Chr2	9496052	9497136		Chr3	19358136	19358816
	Chr2	9584492	9585378		Chr3	22215279	22215958
	Chr2	9644500	9645243		Chr3	10969414	10970093
	Chr2	9852041	9853022		Chr3	16854827	16855534
	Chr2	9854081	9854945		Chr3	10991052	10991733
	Chr2	9922601	9923495		Chr3	17545739	17546431
	Chr2	10001480	10009658		Chr3	17352957	17353611
	Chr2	10036535	10040268		Chr3	6621332	6622007
	Chr2	10085509	10093594		Chr3	12350351	12350968
	Chr2	10144769	10145431		Chr3	17682160	17682953
	Chr2	10181538	10182045		Chr3	16568177	16568744
	Chr2	10198690	10199558		Chr3	16409328	16409892
	Chr2	10238929	10239533		Chr3	16573765	16574340
	Chr2	10255513	10256096		Chr3	8742042	8742827
	Chr2	10278666	10279408		Chr3	16293538	16294108
	Chr2	10292009	10292646		Chr3	422657	423210
	Chr2	10351573	10352460		Chr3	11054129	11054934
	Chr2	10367215	10368137		Chr3	19088119	19088921
	Chr2	10433808	10434595		Chr3	10717785	10718343
	Chr2	10441388	10443044		Chr3	10928289	10929021
	Chr2	10466227	10467597		Chr3	2258772	2259575
	Chr2	10467649	10468258		Chr3	10937165	10937768
	Chr2	10468259	10469079		Chr3	11393821	11394418
	Chr2	10469137	10470100		Chr3	18179967	18180736
	Chr2	10470389	10471317		Chr3	1074148	1074909
	Chr2	10557819	10558547		Chr3	8149876	8150491
	Chr2	10677491	10678139		Chr3	8218830	8219594
	Chr2	10678457	10679017		Chr3	11090407	11091000
	Chr2	10707222	10709131		Chr3	10186193	10187167
	Chr2	10749223	10750409		Chr3	10531242	10532212
	Chr2	10842131	10842797		Chr3	16320644	16321600
	Chr2	10950317	10952384		Chr3	22172754	22173694
	Chr2	11066246	11066852		Chr3	17042053	17043012
	Chr2	11100068	11101221		Chr3	8212497	8213454
	Chr2	11101222	11102213		Chr4	1462469	1463389
	Chr2	11119584	11120449		Chr4	6098510	6099120
	Chr2	11373154	11374305		Chr4	667501	668117
	Chr2	11508159	11508795		Chr4	488367	489298
	Chr2	11559449	11561789		Chr4	3767046	3767958
	Chr2	11643281	11644011		Chr4	7170721	7171498
	Chr2	11663672	11664656		Chr4	12844292	12845068
	Chr2	11760358	11761198		Chr4	6046686	6047294
	Chr2	11867186	11868276		Chr4	558433	559338
	Chr2	11963579	11964336		Chr4	6550622	6551583
	Chr2	11991785	11993117		Chr4	1301948	1302908
	Chr2	11993118	11993984		Chr4	2311805	2312437
	Chr2	12106750	12107260		Chr4	2344570	2345526
	Chr2	12149433	12150234		Chr4	17511346	17511983
	Chr2	12622297	12622875		Chr4	5895492	5896385
	Chr2	12724687	12725201		Chr4	376598	377216
	Chr2	12812063	12812737		Chr4	5167255	5167880
	Chr2	12833205	12834104		Chr4	2467190	2467737
	Chr2	12876125	12877655		Chr4	10631798	10632377
	Chr2	12979089	12980532		Chr4	520928	521766
	Chr2	13024831	13025838		Chr4	5634132	5634685
	Chr2	13223059	13227048		Chr4	105622	106201
	Chr2	13374540	13375293		Chr4	5191530	5192076
	Chr2	13480882	13481528		Chr4	8214539	8215395
	Chr2	14008868	14009432		Chr4	12598063	12598920
	Chr2	14290092	14290631		Chr4	823507	824051
	Chr2	14407884	14412426		Chr4	15397745	15398694
	Chr2	14457372	14458307		Chr4	144669	145234
	Chr2	14553742	14555904		Chr4	654611	655174
	Chr2	14653181	14653863		Chr4	6216442	6217008
	Chr2	14701313	14702080		Chr4	2408779	2409351
	Chr2	14810760	14811945		Chr4	5409353	5410235
	Chr2	14840799	14842135		Chr4	9988583	9989464
	Chr2	14951837	14952861		Chr4	15595862	15596742
	Chr2	15007634	15009235		Chr4	5843663	5844554
	Chr2	15098140	15098837		Chr4	9756115	9756980
	Chr2	15130953	15131580		Chr4	14327860	14328735
	Chr2	15273637	15274176		Chr4	17211992	17212583
	Chr2	15595121	15597210		Chr4	2313524	2314192
	Chr2	15884475	15885121		Chr4	2606286	2606957
	Chr2	16030119	16030650		Chr4	5553156	5553883
	Chr2	16379576	16380843		Chr4	7177952	7178615
	Chr2	16467347	16467949		Chr4	9981118	9981841
	Chr2	16625761	16626817		Chr4	2258702	2259375
	Chr2	16957051	16958075		Chr4	6885796	6886461
	Chr2	17005420	17006521		Chr4	6598707	6599401
	Chr2	17008780	17009940		Chr4	9145543	9146066
	Chr2	17205774	17206413		Chr4	2535193	2535867
	Chr2	17256002	17256671		Chr4	7251143	7251894
	Chr2	17337767	17342489		Chr4	1379909	1380892
	Chr2	17417947	17419429		Chr4	14433163	14434146
	Chr2	17486368	17487161		Chr4	7688590	7689574
	Chr2	17487163	17489023		Chr4	4547286	4548158
	Chr2	17545764	17546812		Chr4	11756667	11757315
	Chr2	18652626	18655464		Chr4	6214889	6215545
	Chr2	19322501	19323957		Chr4	6027163	6028139
	Chr2	19527734	19529185		Chr5	8702814	8703493
	Chr3	156971	158138		Chr5	8312112	8313095
	Chr3	422486	423446		Chr5	26209504	26210488
	Chr3	422657	423210		Chr5	3372196	3373187
	Chr3	525370	526255		Chr5	19498747	19499722
	Chr3	985157	986226		Chr5	8727112	8728101
	Chr3	1074148	1074909		Chr5	7818048	7819010
	Chr3	1283138	1283991		Chr5	13417303	13418253
	Chr3	1555420	1560680		Chr5	8215122	8216116
	Chr3	1602086	1602670		Chr5	14138820	14139724
	Chr3	2138405	2139312		Chr5	24435712	24436607
	Chr3	2258772	2259575		Chr5	14760313	14761208
	Chr3	2259576	2260955		Chr5	9041913	9042847
	Chr3	2600864	2601601		Chr5	14753422	14754356
	Chr3	2772912	2773424		Chr5	14297162	14298093
	Chr3	2808422	2818893		Chr5	18500733	18501486
	Chr3	3664653	3665709		Chr5	3605550	3606291
	Chr3	3742748	3743368		Chr5	13101559	13102300
	Chr3	3807367	3812643		Chr5	19639716	19640579
	Chr3	3837726	3838970		Chr5	25844627	25845404
	Chr3	3873755	3874629		Chr5	14246825	14247605
	Chr3	4494522	4495163		Chr5	19558171	19558950
	Chr3	4752111	4753096		Chr5	13471681	13472449
	Chr3	4796011	4797014		Chr5	10474405	10475121
	Chr3	4929015	4932433		Chr5	18499818	18500521
	Chr3	4977260	4978185		Chr5	14076336	14077067
	Chr3	5163322	5164532		Chr5	14298115	14298829
	Chr3	5277962	5286732		Chr5	15122090	15122814
	Chr3	5495820	5496457		Chr5	15639865	15640757
	Chr3	5590741	5591635		Chr5	19497854	19498746
	Chr3	5642949	5643530		Chr5	1979120	1979996
	Chr3	5651129	5652442		Chr5	5647897	5648761
	Chr3	5864618	5865854		Chr5	17432487	17433293
	Chr3	5865855	5866442		Chr5	10802072	10802878
	Chr3	5929425	5930702		Chr5	21015769	21016577
	Chr3	5981917	5983138		Chr5	9574274	9575059
	Chr3	6073211	6073718		Chr5	9289252	9290036
	Chr3	6100878	6101623		Chr5	17221121	17221914
	Chr3	6430942	6431721		Chr5	14608196	14609008
	Chr3	6621332	6622007		Chr5	17520989	17521821
	Chr3	6706028	6707225		Chr5	15152632	15153464
	Chr3	6716975	6718178		Chr5	9635008	9635834
	Chr3	6728213	6729552		Chr5	12568312	12569138
	Chr3	7040846	7041553		Chr5	15160707	15161496
	Chr3	7192833	7193937		Chr5	9007979	9008723
	Chr3	7291081	7291966		Chr5	19964369	19964981
	Chr3	7318380	7319304		Chr5	20527139	20527756
	Chr3	7341947	7342567		Chr5	5707094	5707646
	Chr3	7897536	7898460		Chr5	2256600	2257215
	Chr3	7981054	7982069		Chr5	21695863	21696468
	Chr3	8149876	8150491		Chr5	14946611	14947230
	Chr3	8209851	8210857		Chr5	19451750	19452354
	Chr3	8212497	8213454		Chr5	19452355	19452965
	Chr3	8218830	8219594		Chr5	14648283	14648892
	Chr3	8220044	8220664		Chr5	26787043	26787652
	Chr3	8230715	8232502		Chr5	15151483	15152120
	Chr3	8328187	8330497		Chr5	8860081	8860702
	Chr3	8328599	8329494		Chr5	12963991	12964619
	Chr3	8343660	8345642		Chr5	15153730	15154301
	Chr3	8510116	8510650		Chr5	17804188	17804766
	Chr3	8596061	8597767		Chr5	7414525	7415085
	Chr3	8742042	8742827		Chr5	3902531	3903099
	Chr3	8842971	8857757		Chr5	7057992	7058588
	Chr3	8872329	8873544		Chr5	16967167	16967750
	Chr3	8883340	8884016		Chr5	14945302	14945903
	Chr3	9011213	9017190		Chr5	1655410	1656010
	Chr3	9236767	9240922		Chr5	18357756	18358309
	Chr3	9256634	9258148		Chr5	18985892	18986476
	Chr3	9327694	9328269		Chr5	15886529	15887192
	Chr3	9387867	9393251		Chr5	10806017	10806528
	Chr3	9428479	9429162		Chr5	10547235	10547746
	Chr3	9575237	9575819		Chr5	6995164	6995680
	Chr3	9576220	9577646		Chr5	6109570	6110259
	Chr3	9702880	9703562		Chr5	13095787	13096476
	Chr3	9723884	9736151		Chr5	21803888	21804402
	Chr3	9736152	9736695		Chr5	17095160	17095666
	Chr3	9739656	9740357		Chr5	13612931	13613614
	Chr3	9740642	9741415		Chr5	13892074	13892758
	Chr3	9899561	9900766		Chr5	20233164	20233830
	Chr3	9987076	9988701		Chr5	24530827	24531336
	Chr3	10006154	10008498		Chr5	1116295	1116803
	Chr3	10008501	10009413		Chr5	10528595	10529239
	Chr3	10065947	10067204		Chr5	17825941	17826637
	Chr3	10106100	10111467		Chr5	15591361	15592061
	Chr3	10186193	10187167		Chr5	10475496	10476146
	Chr3	10200583	10201124		Chr5	14606089	14606593
	Chr3	10262504	10263076		Chr1	18806508	18807394
	Chr3	10313643	10314813
	Chr3	10373032	10374065
	Chr3	10375323	10375827
	Chr3	10457033	10458506
	Chr3	10460990	10463046
	Chr3	10463419	10465097
	Chr3	10531242	10532212
	Chr3	10666364	10666944
	Chr3	10717785	10718343
	Chr3	10860237	10860747
	Chr3	10883376	10884081
	Chr3	10917704	10922777
	Chr3	10928289	10929021
	Chr3	10933496	10934173
	Chr3	10937165	10937768
	Chr3	10938648	10939801
	Chr3	10969414	10970093
	Chr3	10970102	10976062
	Chr3	10977979	10980184
	Chr3	10991052	10991733
	Chr3	11016111	11020804
	Chr3	11026015	11026787
	Chr3	11054129	11054934
	Chr3	11055896	11062842
	Chr3	11071421	11072816
	Chr3	11078905	11079437
	Chr3	11079438	11080737
	Chr3	11088992	11090176
	Chr3	11090407	11091000
	Chr3	11093560	11094554
	Chr3	11097260	11099626
	Chr3	11116002	11120737
	Chr3	11141519	11142228
	Chr3	11157911	11158915
	Chr3	11207842	11208997
	Chr3	11271686	11272375
	Chr3	11272701	11273207
	Chr3	11360138	11362878
	Chr3	11360692	11361223
	Chr3	11392706	11393765
	Chr3	11393821	11394418
	Chr3	11541283	11549498
	Chr3	11602485	11603489
	Chr3	11714167	11715294
	Chr3	11739407	11740037
	Chr3	11743225	11744059
	Chr3	11749952	11751261
	Chr3	11793559	11798454
	Chr3	11800780	11801357
	Chr3	12243189	12243827
	Chr3	12348429	12350350
	Chr3	12350351	12350968
	Chr3	12353844	12354728
	Chr3	12457389	12458153
	Chr3	12558292	12559109
	Chr3	12559239	12560276
	Chr3	12659604	12662089
	Chr3	12663165	12666581
	Chr3	12669318	12670623
	Chr3	13044777	13046686
	Chr3	13476641	13480691
	Chr3	13806245	13809268
	Chr3	14062034	14072953
	Chr3	14064626	14067617
	Chr3	14064914	14066181
	Chr3	14095731	14097279
	Chr3	14097290	14111363
	Chr3	14233434	14234124
	Chr3	14237710	14242634
	Chr3	14272908	14285452
	Chr3	14650511	14651558
	Chr3	14690344	14701784
	Chr3	14773640	14783116
	Chr3	14804955	14809563
	Chr3	14910927	14913451
	Chr3	14912144	14913339
	Chr3	15270935	15271719
	Chr3	15271726	15277050
	Chr3	15294942	15295804
	Chr3	15339111	15347116
	Chr3	15344560	15345202
	Chr3	15358956	15359569
	Chr3	15361697	15365347
	Chr3	15618675	15619874
	Chr3	15619877	15620628
	Chr3	15748980	15749864
	Chr3	15779478	15780631
	Chr3	15895506	15896087
	Chr3	15896903	15898389
	Chr3	16099169	16100856
	Chr3	16100857	16106213
	Chr3	16156563	16158214
	Chr3	16293538	16294108
	Chr3	16301843	16303089
	Chr3	16320644	16321600
	Chr3	16357473	16358092
	Chr3	16405293	16406121
	Chr3	16407578	16408500
	Chr3	16409328	16409892
	Chr3	16470340	16471533
	Chr3	16498552	16499159
	Chr3	16539300	16539821
	Chr3	16540351	16541285
	Chr3	16549968	16550605
	Chr3	16553082	16554521
	Chr3	16568177	16568744
	Chr3	16573765	16574340
	Chr3	16574582	16575656
	Chr3	16600733	16604312
	Chr3	16669866	16672298
	Chr3	16723025	16723678
	Chr3	16737596	16738663
	Chr3	16809185	16814151
	Chr3	16854827	16855534
	Chr3	17033255	17034688
	Chr3	17042053	17043012
	Chr3	17044447	17045997
	Chr3	17047951	17048625
	Chr3	17050192	17051429
	Chr3	17055553	17057941
	Chr3	17060733	17063206
	Chr3	17141138	17141771
	Chr3	17141846	17143390
	Chr3	17143391	17157692
	Chr3	17147538	17148178
	Chr3	17202778	17203930
	Chr3	17310913	17311829
	Chr3	17352957	17353611
	Chr3	17355557	17356679
	Chr3	17393358	17395137
	Chr3	17396405	17397020
	Chr3	17397021	17397647
	Chr3	17429622	17437290
	Chr3	17531512	17532377
	Chr3	17545739	17546431
	Chr3	17565815	17566336
	Chr3	17640547	17641085
	Chr3	17682160	17682953
	Chr3	17729459	17731271
	Chr3	17928967	17929554
	Chr3	17978745	17983946
	Chr3	17984181	17985366
	Chr3	17984422	17984975
	Chr3	17985638	17986901
	Chr3	18179967	18180736
	Chr3	18243803	18244528
	Chr3	18295638	18296205
	Chr3	18308793	18310956
	Chr3	18457586	18458243
	Chr3	18458244	18458917
	Chr3	18518882	18519390
	Chr3	18544269	18545573
	Chr3	18652085	18653144
	Chr3	18791152	18796089
	Chr3	18811213	18812091
	Chr3	18850417	18851097
	Chr3	18885614	18887516
	Chr3	18948268	18949362
	Chr3	19085515	19086280
	Chr3	19088119	19088921
	Chr3	19133501	19134414
	Chr3	19142387	19143433
	Chr3	19219284	19219812
	Chr3	19358136	19358816
	Chr3	19436874	19437446
	Chr3	19533230	19533871
	Chr3	19621942	19624005
	Chr3	19754077	19755173
	Chr3	19959134	19959641
	Chr3	20233539	20234626
	Chr3	20304981	20309967
	Chr3	20353390	20353918
	Chr3	20629317	20629826
	Chr3	20726148	20727046
	Chr3	21130158	21130711
	Chr3	21266073	21266822
	Chr3	21322657	21327537
	Chr3	21694105	21694936
	Chr3	21882627	21883496
	Chr3	21967288	21968306
	Chr3	22112933	22115657
	Chr3	22172754	22173694
	Chr3	22214774	22215278
	Chr3	22215279	22215958
	Chr3	22232308	22236743
	Chr3	22747219	22747905
	Chr3	23109446	23115857
	Chr3	23203577	23207484
	Chr4	15965	17542
	Chr4	66450	67743
	Chr4	79007	79898
	Chr4	105622	106201
	Chr4	144669	145234
	Chr4	184375	185512
	Chr4	376598	377216
	Chr4	474383	475199
	Chr4	488367	489298
	Chr4	520928	521766
	Chr4	521767	522390
	Chr4	558433	559338
	Chr4	593747	595309
	Chr4	631181	636931
	Chr4	654611	655174
	Chr4	664012	665069
	Chr4	667501	668117
	Chr4	823507	824051
	Chr4	860921	864078
	Chr4	1016803	1021368
	Chr4	1026487	1026997
	Chr4	1088877	1089644
	Chr4	1091113	1091942
	Chr4	1140509	1141010
	Chr4	1141844	1143301
	Chr4	1230735	1231738
	Chr4	1233641	1234831
	Chr4	1280596	1283240
	Chr4	1301948	1302908
	Chr4	1379909	1380892
	Chr4	1462469	1463389
	Chr4	1480681	1481576
	Chr4	1485996	1486549
	Chr4	1487367	1488605
	Chr4	1514070	1514695
	Chr4	1565686	1567408
	Chr4	1568875	1569443
	Chr4	2018788	2019963
	Chr4	2245569	2256834
	Chr4	2258702	2259375
	Chr4	2286691	2288784
	Chr4	2310763	2313234
	Chr4	2311805	2312437
	Chr4	2313524	2314192
	Chr4	2318376	2320411
	Chr4	2321011	2322025
	Chr4	2344570	2345526
	Chr4	2388223	2388831
	Chr4	2397861	2398704
	Chr4	2408779	2409351
	Chr4	2464308	2464847
	Chr4	2467190	2467737
	Chr4	2470299	2471300
	Chr4	2527506	2530307
	Chr4	2535193	2535867
	Chr4	2549584	2552876
	Chr4	2552877	2553516
	Chr4	2604628	2605726
	Chr4	2606286	2606957
	Chr4	2643338	2648818
	Chr4	2723308	2724404
	Chr4	2733589	2734901
	Chr4	2793619	2794283
	Chr4	2795183	2796070
	Chr4	2796448	2800705
	Chr4	3766820	3768072
	Chr4	3767046	3767958
	Chr4	3768131	3769181
	Chr4	3769194	3770841
	Chr4	3940830	3945016
	Chr4	4207161	4208174
	Chr4	4209027	4214178
	Chr4	4307637	4309187
	Chr4	4309188	4314013
	Chr4	4547286	4548158
	Chr4	4643049	4643704
	Chr4	4645310	4648816
	Chr4	4809779	4821017
	Chr4	4822547	4824153
	Chr4	5136512	5138048
	Chr4	5138388	5139965
	Chr4	5143518	5144031
	Chr4	5144109	5144778
	Chr4	5167255	5167880
	Chr4	5191530	5192076
	Chr4	5192472	5194635
	Chr4	5257027	5271699
	Chr4	5398802	5402984
	Chr4	5407776	5414972
	Chr4	5408352	5409300
	Chr4	5409353	5410235
	Chr4	5437217	5438404
	Chr4	5485146	5494752
	Chr4	5520207	5536230
	Chr4	5553156	5553883
	Chr4	5611200	5613631
	Chr4	5618042	5619125
	Chr4	5634132	5634685
	Chr4	5649125	5649904
	Chr4	5664683	5667847
	Chr4	5669703	5671168
	Chr4	5671241	5672269
	Chr4	5673996	5676613
	Chr4	5701473	5702468
	Chr4	5771969	5773031
	Chr4	5790779	5791870
	Chr4	5822426	5827300
	Chr4	5835598	5837090
	Chr4	5837985	5838747
	Chr4	5843663	5844554
	Chr4	5845121	5846835
	Chr4	5895492	5896385
	Chr4	5929504	5930077
	Chr4	5932549	5933674
	Chr4	5933675	5934828
	Chr4	5934829	5936446
	Chr4	5992065	5992690
	Chr4	6027163	6028139
	Chr4	6046686	6047294
	Chr4	6098510	6099120
	Chr4	6102121	6102666
	Chr4	6113710	6116485
	Chr4	6208485	6209577
	Chr4	6209999	6211623
	Chr4	6214889	6215545
	Chr4	6216442	6217008
	Chr4	6242828	6244032
	Chr4	6303442	6304518
	Chr4	6331946	6332854
	Chr4	6482765	6483693
	Chr4	6549540	6550621
	Chr4	6550622	6551583
	Chr4	6581050	6581638
	Chr4	6598707	6599401
	Chr4	6624816	6626388
	Chr4	6688783	6689667
	Chr4	6723347	6728790
	Chr4	6830824	6831757
	Chr4	6880119	6880731
	Chr4	6885796	6886461
	Chr4	6952620	6953479
	Chr4	7011697	7012856
	Chr4	7040603	7042300
	Chr4	7089369	7089906
	Chr4	7101226	7102618
	Chr4	7170721	7171498
	Chr4	7177952	7178615
	Chr4	7179128	7179748
	Chr4	7245315	7246069
	Chr4	7251143	7251894
	Chr4	7300396	7301656
	Chr4	7419747	7420455
	Chr4	7422109	7424541
	Chr4	7425564	7427007
	Chr4	7443634	7444600
	Chr4	7470758	7471932
	Chr4	7519972	7520914
	Chr4	7525028	7526697
	Chr4	7554327	7556090
	Chr4	7687714	7688589
	Chr4	7688590	7689574
	Chr4	7773815	7774468
	Chr4	8141781	8142803
	Chr4	8214539	8215395
	Chr4	8294944	8296098
	Chr4	8313636	8319046
	Chr4	8327633	8329716
	Chr4	8633209	8634456
	Chr4	8749997	8750567
	Chr4	8782112	8783572
	Chr4	8783865	8785474
	Chr4	8819991	8821573
	Chr4	8882426	8883800
	Chr4	9145543	9146066
	Chr4	9146067	9147273
	Chr4	9570499	9575603
	Chr4	9687709	9688988
	Chr4	9756115	9756980
	Chr4	9954151	9958038
	Chr4	9981118	9981841
	Chr4	9988583	9989464
	Chr4	10171927	10174176
	Chr4	10269633	10271678
	Chr4	10508742	10514094
	Chr4	10525492	10526464
	Chr4	10631798	10632377
	Chr4	10632487	10633716
	Chr4	10648123	10649338
	Chr4	10747964	10749188
	Chr4	10770732	10771757
	Chr4	10870781	10871688
	Chr4	10899528	10904738
	Chr4	10992996	10998058
	Chr4	10999801	11000869
	Chr4	11036485	11040233
	Chr4	11122742	11123827
	Chr4	11363560	11368654
	Chr4	11368906	11369421
	Chr4	11370989	11372669
	Chr4	11379873	11380587
	Chr4	11380643	11382073
	Chr4	11676468	11681340
	Chr4	11756667	11757315
	Chr4	12094422	12095377
	Chr4	12261932	12263275
	Chr4	12598063	12598920
	Chr4	12844292	12845068
	Chr4	13656882	13657805
	Chr4	13887249	13888108
	Chr4	13903039	13903681
	Chr4	14280183	14288304
	Chr4	14327860	14328735
	Chr4	14333492	14334241
	Chr4	14433163	14434146
	Chr4	14530698	14531436
	Chr4	14750236	14750900
	Chr4	14911696	14912675
	Chr4	14978036	14979213
	Chr4	15397745	15398694
	Chr4	15595862	15596742
	Chr4	15922833	15924043
	Chr4	16054514	16055641
	Chr4	16729212	16730433
	Chr4	16782720	16783573
	Chr4	17211992	17212583
	Chr4	17213048	17214415
	Chr4	17501120	17502316
	Chr4	17511346	17511983
	Chr4	17638267	17638779
	Chr4	17712148	17716980
	Chr4	18249665	18251647
	Chr4	18434274	18435359
	Chr5	64772	71199
	Chr5	135831	141287
	Chr5	393552	394732
	Chr5	490080	491096
	Chr5	1116295	1116803
	Chr5	1180386	1181904
	Chr5	1485677	1489443
	Chr5	1501774	1502465
	Chr5	1655410	1656010
	Chr5	1812052	1812602
	Chr5	1979120	1979996
	Chr5	1981368	1982222
	Chr5	2071545	2072640
	Chr5	2105861	2107449
	Chr5	2256600	2257215
	Chr5	2257475	2262962
	Chr5	2289070	2289711
	Chr5	2374076	2377446
	Chr5	2441253	2443637
	Chr5	2603142	2605573
	Chr5	3005871	3007470
	Chr5	3372196	3373187
	Chr5	3605550	3606291
	Chr5	3750498	3751194
	Chr5	3895558	3896437
	Chr5	3902531	3903099
	Chr5	3903107	3904246
	Chr5	3904621	3909856
	Chr5	3944943	3947148
	Chr5	4640763	4642974
	Chr5	4936863	4937774
	Chr5	4936963	4937566
	Chr5	5217640	5218293
	Chr5	5218900	5220422
	Chr5	5350957	5352117
	Chr5	5592793	5593451
	Chr5	5593871	5594588
	Chr5	5625060	5625653
	Chr5	5647897	5648761
	Chr5	5701673	5706730
	Chr5	5707094	5707646
	Chr5	5707712	5710613
	Chr5	5785178	5786394
	Chr5	5854205	5855060
	Chr5	6109570	6110259
	Chr5	6348990	6351608
	Chr5	6398674	6399464
	Chr5	6433631	6438777
	Chr5	6538496	6539564
	Chr5	6632968	6635341
	Chr5	6913795	6915667
	Chr5	6995164	6995680
	Chr5	7027973	7037665
	Chr5	7041125	7042955
	Chr5	7057992	7058588
	Chr5	7152939	7155014
	Chr5	7344748	7345294
	Chr5	7414525	7415085
	Chr5	7604820	7605898
	Chr5	7643929	7644545
	Chr5	7818034	7819050
	Chr5	7818048	7819010
	Chr5	7821796	7823160
	Chr5	7829783	7830291
	Chr5	7909602	7911784
	Chr5	8155764	8156685
	Chr5	8204502	8205214
	Chr5	8215122	8216116
	Chr5	8216175	8217121
	Chr5	8312112	8313095
	Chr5	8313098	8314181
	Chr5	8314182	8314823
	Chr5	8362558	8363404
	Chr5	8374285	8374969
	Chr5	8374970	8375660
	Chr5	8404055	8405675
	Chr5	8404443	8405117
	Chr5	8446240	8447266
	Chr5	8451572	8452280
	Chr5	8571574	8577832
	Chr5	8702010	8702759
	Chr5	8702814	8703493
	Chr5	8722405	8723471
	Chr5	8727112	8728101
	Chr5	8748927	8749501
	Chr5	8769450	8770675
	Chr5	8809340	8810410
	Chr5	8860081	8860702
	Chr5	9007979	9008723
	Chr5	9013221	9013767
	Chr5	9020350	9022599
	Chr5	9041913	9042847
	Chr5	9260789	9261456
	Chr5	9279625	9280496
	Chr5	9289252	9290036
	Chr5	9321773	9323049
	Chr5	9324743	9326092
	Chr5	9428892	9430016
	Chr5	9442596	9444440
	Chr5	9470415	9471278
	Chr5	9472123	9472654
	Chr5	9487452	9488211
	Chr5	9574274	9575059
	Chr5	9635008	9635834
	Chr5	9638933	9640878
	Chr5	9641505	9643917
	Chr5	9686109	9687387
	Chr5	9876499	9877104
	Chr5	9910299	9911640
	Chr5	10061001	10064751
	Chr5	10193496	10194533
	Chr5	10350376	10356320
	Chr5	10473593	10474296
	Chr5	10474405	10475121
	Chr5	10475496	10476146
	Chr5	10528595	10529239
	Chr5	10547235	10547746
	Chr5	10632241	10633944
	Chr5	10632794	10633563
	Chr5	10633968	10635312
	Chr5	10724493	10725611
	Chr5	10725637	10728091
	Chr5	10779451	10780060
	Chr5	10802072	10802878
	Chr5	10806017	10806528
	Chr5	11386012	11387274
	Chr5	12547599	12548470
	Chr5	12566843	12568021
	Chr5	12568312	12569138
	Chr5	12569605	12570941
	Chr5	12615236	12622961
	Chr5	12616214	12621590
	Chr5	12685005	12686216
	Chr5	12960450	12961547
	Chr5	12963991	12964619
	Chr5	12966769	12968156
	Chr5	13095787	13096476
	Chr5	13096918	13097930
	Chr5	13101559	13102300
	Chr5	13241280	13241992
	Chr5	13417303	13418253
	Chr5	13471681	13472449
	Chr5	13472832	13473901
	Chr5	13612931	13613614
	Chr5	13703432	13704886
	Chr5	13774192	13775153
	Chr5	13861309	13862577
	Chr5	13886472	13890658
	Chr5	13892074	13892758
	Chr5	13925974	13930453
	Chr5	13960646	13968612
	Chr5	14036303	14040000
	Chr5	14076336	14077067
	Chr5	14083274	14088529
	Chr5	14094421	14097965
	Chr5	14138820	14139724
	Chr5	14158313	14172169
	Chr5	14246825	14247605
	Chr5	14280683	14281506
	Chr5	14295647	14296757
	Chr5	14297162	14298093
	Chr5	14298115	14298829
	Chr5	14573442	14574452
	Chr5	14574599	14580412
	Chr5	14602464	14603754
	Chr5	14606089	14606593
	Chr5	14608196	14609008
	Chr5	14610717	14611593
	Chr5	14612588	14613207
	Chr5	14623775	14624631
	Chr5	14625614	14627128
	Chr5	14627233	14627966
	Chr5	14645935	14646671
	Chr5	14647141	14648201
	Chr5	14648283	14648892
	Chr5	14753422	14754356
	Chr5	14754521	14755395
	Chr5	14760313	14761208
	Chr5	14945302	14945903
	Chr5	14946611	14947230
	Chr5	14984861	14985741
	Chr5	14994454	14995067
	Chr5	15000779	15001475
	Chr5	15002082	15003226
	Chr5	15075388	15077865
	Chr5	15105645	15107012
	Chr5	15113468	15114305
	Chr5	15122090	15122814
	Chr5	15137453	15138822
	Chr5	15139395	15140550
	Chr5	15143605	15144360
	Chr5	15148493	15151482
	Chr5	15151483	15152120
	Chr5	15152121	15152631
	Chr5	15152632	15153464
	Chr5	15153730	15154301
	Chr5	15160707	15161496
	Chr5	15161497	15163864
	Chr5	15205109	15207898
	Chr5	15259489	15260791
	Chr5	15408569	15409487
	Chr5	15428649	15429823
	Chr5	15454017	15455706
	Chr5	15580912	15581608
	Chr5	15591361	15592061
	Chr5	15623983	15625333
	Chr5	15639865	15640757
	Chr5	15646197	15651173
	Chr5	15755156	15755849
	Chr5	15779045	15779840
	Chr5	15791107	15791849
	Chr5	15886529	15887192
	Chr5	15913073	15913745
	Chr5	15917930	15918650
	Chr5	15972493	15973914
	Chr5	16108824	16110017
	Chr5	16159404	16160186
	Chr5	16160285	16161266
	Chr5	16178388	16179572
	Chr5	16196037	16196973
	Chr5	16387698	16388592
	Chr5	16560410	16562449
	Chr5	16587823	16588504
	Chr5	16681586	16682292
	Chr5	16855738	16856861
	Chr5	16908096	16910311
	Chr5	16910315	16911409
	Chr5	16961287	16962328
	Chr5	16967167	16967750
	Chr5	17002870	17003512
	Chr5	17059193	17060601
	Chr5	17095160	17095666
	Chr5	17146926	17147563
	Chr5	17209858	17210641
	Chr5	17221121	17221914
	Chr5	17432487	17433293
	Chr5	17441792	17445927
	Chr5	17520989	17521821
	Chr5	17596759	17605846
	Chr5	17726227	17727004
	Chr5	17740219	17742501
	Chr5	17804188	17804766
	Chr5	17825941	17826637
	Chr5	17890064	17890586
	Chr5	17893551	17901550
	Chr5	18142156	18146898
	Chr5	18147312	18148181
	Chr5	18171286	18172315
	Chr5	18357756	18358309
	Chr5	18413671	18416199
	Chr5	18420199	18420745
	Chr5	18499818	18500521
	Chr5	18500733	18501486
	Chr5	18538976	18539699
	Chr5	18669044	18669971
	Chr5	18928066	18929471
	Chr5	18933096	18938943
	Chr5	18985892	18986476
	Chr5	19024212	19025157
	Chr5	19026401	19027770
	Chr5	19101560	19102178
	Chr5	19174544	19175868
	Chr5	19358618	19363928
	Chr5	19425890	19427193
	Chr5	19438985	19440096
	Chr5	19451750	19452354
	Chr5	19452355	19452965
	Chr5	19493778	19494625
	Chr5	19495551	19496983
	Chr5	19497854	19498746
	Chr5	19498747	19499722
	Chr5	19504736	19506670
	Chr5	19558171	19558950
	Chr5	19639716	19640579
	Chr5	19743369	19744026
	Chr5	19822935	19823876
	Chr5	19910477	19911610
	Chr5	19912439	19913546
	Chr5	19964369	19964981
	Chr5	19966162	19966791
	Chr5	20059830	20061632
	Chr5	20233164	20233830
	Chr5	20277086	20278156
	Chr5	20278780	20282135
	Chr5	20527139	20527756
	Chr5	20558575	20559918
	Chr5	20631775	20632292
	Chr5	20639226	20640383
	Chr5	20855632	20856783
	Chr5	21015769	21016577
	Chr5	21542894	21546691
	Chr5	21668187	21668894
	Chr5	21695863	21696468
	Chr5	21803888	21804402
	Chr5	21832304	21834623
	Chr5	22002017	22006884
	Chr5	22021051	22022597
	Chr5	22137036	22138086
	Chr5	22259547	22261012
	Chr5	22491501	22492416
	Chr5	22510693	22512918
	Chr5	22534329	22535096
	Chr5	23240675	23241308
	Chr5	23282546	23283063
	Chr5	23661755	23662856
	Chr5	24117962	24118598
	Chr5	24343853	24345901
	Chr5	24435712	24436607
	Chr5	24448645	24449557
	Chr5	24448804	24449405
	Chr5	24475199	24476590
	Chr5	24530827	24531336
	Chr5	24585979	24586617
	Chr5	24818770	24820162
	Chr5	24942028	24943968
	Chr5	25048858	25049375
	Chr5	25360664	25361439
	Chr5	25468578	25469816
	Chr5	25470369	25471129
	Chr5	25844627	25845404
	Chr5	26209504	26210488
	Chr5	26258474	26260064
	Chr5	26290110	26290620
	Chr5	26787043	26787652

## Sheet: drm12 vs cmt2 DMRs
	cmt2_hypoCHH_hcDMRs_GSM98100				drm12_hypoCHH_hcDMRs_lib_GSM981015
	Chr1	10153000	10153100		Chr1	10021401	10021500
	Chr1	10153700	10153800		Chr1	10021501	10021600
	Chr1	10153900	10154000		Chr1	10021801	10021900
	Chr1	10154100	10154200		Chr1	10060701	10060800
	Chr1	10154600	10154700		Chr1	10152701	10152800
	Chr1	10156400	10156500		Chr1	10156601	10156700
	Chr1	10347400	10347500		Chr1	10156701	10156800
	Chr1	10347800	10347900		Chr1	10161001	10161100
	Chr1	10357200	10357300		Chr1	10173201	10173300
	Chr1	10357500	10357600		Chr1	10206701	10206800
	Chr1	10357600	10357700		Chr1	10206901	10207000
	Chr1	10357700	10357800		Chr1	10239301	10239400
	Chr1	10357900	10358000		Chr1	10240001	10240100
	Chr1	10358000	10358100		Chr1	10315301	10315400
	Chr1	10358100	10358200		Chr1	10347101	10347200
	Chr1	10358200	10358300		Chr1	10349201	10349300
	Chr1	10358300	10358400		Chr1	10349301	10349400
	Chr1	10358400	10358500		Chr1	10421501	10421600
	Chr1	10358500	10358600		Chr1	10444001	10444100
	Chr1	10358700	10358800		Chr1	10497801	10497900
	Chr1	10358800	10358900		Chr1	10506501	10506600
	Chr1	10358900	10359000		Chr1	10506701	10506800
	Chr1	10359000	10359100		Chr1	10506801	10506900
	Chr1	10359100	10359200		Chr1	10507001	10507100
	Chr1	10359200	10359300		Chr1	10507201	10507300
	Chr1	10359300	10359400		Chr1	10526101	10526200
	Chr1	10359400	10359500		Chr1	10526201	10526300
	Chr1	10359500	10359600		Chr1	10528601	10528700
	Chr1	10359600	10359700		Chr1	10534801	10534900
	Chr1	10359700	10359800		Chr1	10554501	10554600
	Chr1	10359800	10359900		Chr1	10568201	10568300
	Chr1	10360000	10360100		Chr1	10568801	10568900
	Chr1	10360200	10360300		Chr1	10579401	10579500
	Chr1	10360300	10360400		Chr1	10591901	10592000
	Chr1	10360400	10360500		Chr1	10597601	10597700
	Chr1	10360500	10360600		Chr1	10597701	10597800
	Chr1	10360600	10360700		Chr1	10624001	10624100
	Chr1	10360700	10360800		Chr1	10624201	10624300
	Chr1	10360900	10361000		Chr1	10652501	10652600
	Chr1	10361000	10361100		Chr1	10652801	10652900
	Chr1	10361200	10361300		Chr1	10801301	10801400
	Chr1	10361300	10361400		Chr1	10802801	10802900
	Chr1	10361400	10361500		Chr1	10803001	10803100
	Chr1	10361500	10361600		Chr1	10803301	10803400
	Chr1	10361600	10361700		Chr1	10814301	10814400
	Chr1	10361700	10361800		Chr1	10814401	10814500
	Chr1	10361800	10361900		Chr1	10852701	10852800
	Chr1	10361900	10362000		Chr1	10880901	10881000
	Chr1	10362000	10362100		Chr1	10915701	10915800
	Chr1	10362100	10362200		Chr1	10924801	10924900
	Chr1	10362200	10362300		Chr1	10924901	10925000
	Chr1	10362300	10362400		Chr1	10929401	10929500
	Chr1	10362400	10362500		Chr1	11051201	11051300
	Chr1	10362500	10362600		Chr1	11083101	11083200
	Chr1	10362600	10362700		Chr1	11088801	11088900
	Chr1	10532300	10532400		Chr1	11117501	11117600
	Chr1	10532500	10532600		Chr1	11129001	11129100
	Chr1	10533400	10533500		Chr1	11129101	11129200
	Chr1	10534100	10534200		Chr1	11129201	11129300
	Chr1	10534200	10534300		Chr1	11131601	11131700
	Chr1	10603500	10603600		Chr1	11132201	11132300
	Chr1	10603800	10603900		Chr1	11132701	11132800
	Chr1	10604200	10604300		Chr1	11174201	11174300
	Chr1	10604400	10604500		Chr1	11174501	11174600
	Chr1	10696800	10696900		Chr1	11204501	11204600
	Chr1	10696900	10697000		Chr1	11212401	11212500
	Chr1	10697100	10697200		Chr1	11212501	11212600
	Chr1	10697200	10697300		Chr1	11228601	11228700
	Chr1	10697300	10697400		Chr1	11228701	11228800
	Chr1	10697400	10697500		Chr1	11241601	11241700
	Chr1	10697500	10697600		Chr1	11241701	11241800
	Chr1	10697600	10697700		Chr1	11241801	11241900
	Chr1	10697700	10697800		Chr1	11259101	11259200
	Chr1	10697800	10697900		Chr1	11259501	11259600
	Chr1	10697900	10698000		Chr1	11259601	11259700
	Chr1	10698000	10698100		Chr1	11277001	11277100
	Chr1	10698100	10698200		Chr1	11287601	11287700
	Chr1	10698200	10698300		Chr1	11298501	11298600
	Chr1	10698300	10698400		Chr1	11301501	11301600
	Chr1	10698400	10698500		Chr1	11310201	11310300
	Chr1	10698500	10698600		Chr1	11351501	11351600
	Chr1	10698700	10698800		Chr1	11352301	11352400
	Chr1	10698800	10698900		Chr1	11409801	11409900
	Chr1	10698900	10699000		Chr1	11421201	11421300
	Chr1	10699000	10699100		Chr1	11422001	11422100
	Chr1	10699200	10699300		Chr1	11427701	11427800
	Chr1	10699300	10699400		Chr1	11428301	11428400
	Chr1	10699400	10699500		Chr1	11537001	11537100
	Chr1	10699500	10699600		Chr1	11550901	11551000
	Chr1	10699600	10699700		Chr1	1160201	1160300
	Chr1	10699700	10699800		Chr1	11620601	11620700
	Chr1	10699800	10699900		Chr1	11632001	11632100
	Chr1	10700000	10700100		Chr1	11632101	11632200
	Chr1	10700100	10700200		Chr1	11636901	11637000
	Chr1	10700200	10700300		Chr1	11637001	11637100
	Chr1	10700300	10700400		Chr1	11644301	11644400
	Chr1	10700400	10700500		Chr1	11644401	11644500
	Chr1	10700500	10700600		Chr1	11644501	11644600
	Chr1	10700600	10700700		Chr1	11649801	11649900
	Chr1	10700700	10700800		Chr1	11661101	11661200
	Chr1	10700800	10700900		Chr1	11662001	11662100
	Chr1	10700900	10701000		Chr1	11666801	11666900
	Chr1	10701000	10701100		Chr1	11669401	11669500
	Chr1	10701200	10701300		Chr1	11701001	11701100
	Chr1	10701300	10701400		Chr1	11710701	11710800
	Chr1	10880900	10881000		Chr1	11711701	11711800
	Chr1	11048600	11048700		Chr1	11732801	11732900
	Chr1	11065500	11065600		Chr1	11735901	11736000
	Chr1	11065800	11065900		Chr1	11737301	11737400
	Chr1	11097300	11097400		Chr1	11740701	11740800
	Chr1	11097600	11097700		Chr1	11754601	11754700
	Chr1	11097700	11097800		Chr1	11803601	11803700
	Chr1	11098300	11098400		Chr1	11803701	11803800
	Chr1	11099100	11099200		Chr1	11804001	11804100
	Chr1	11099500	11099600		Chr1	11807701	11807800
	Chr1	11100000	11100100		Chr1	11807801	11807900
	Chr1	11100300	11100400		Chr1	11817701	11817800
	Chr1	11102500	11102600		Chr1	11817801	11817900
	Chr1	11103200	11103300		Chr1	11818501	11818600
	Chr1	11103400	11103500		Chr1	11818601	11818700
	Chr1	11103700	11103800		Chr1	11822301	11822400
	Chr1	11148300	11148400		Chr1	11822401	11822500
	Chr1	11148800	11148900		Chr1	11834601	11834700
	Chr1	11148900	11149000		Chr1	1185001	1185100
	Chr1	11149000	11149100		Chr1	11895601	11895700
	Chr1	11149100	11149200		Chr1	1194301	1194400
	Chr1	11149200	11149300		Chr1	1194401	1194500
	Chr1	11150000	11150100		Chr1	1194701	1194800
	Chr1	11150200	11150300		Chr1	1194801	1194900
	Chr1	11150300	11150400		Chr1	1194901	1195000
	Chr1	11150600	11150700		Chr1	1195001	1195100
	Chr1	11150700	11150800		Chr1	11957901	11958000
	Chr1	11150800	11150900		Chr1	11988301	11988400
	Chr1	11151000	11151100		Chr1	12009401	12009500
	Chr1	11151300	11151400		Chr1	12012701	12012800
	Chr1	11151600	11151700		Chr1	12013201	12013300
	Chr1	11151700	11151800		Chr1	12059901	12060000
	Chr1	11151800	11151900		Chr1	12060001	12060100
	Chr1	11152000	11152100		Chr1	12084201	12084300
	Chr1	11152100	11152200		Chr1	12097901	12098000
	Chr1	11152600	11152700		Chr1	12137601	12137700
	Chr1	11302700	11302800		Chr1	12143001	12143100
	Chr1	11302900	11303000		Chr1	12143101	12143200
	Chr1	11303000	11303100		Chr1	12183401	12183500
	Chr1	11303100	11303200		Chr1	12183601	12183700
	Chr1	11303300	11303400		Chr1	12183701	12183800
	Chr1	11303400	11303500		Chr1	12183801	12183900
	Chr1	11303500	11303600		Chr1	12183901	12184000
	Chr1	11303600	11303700		Chr1	12218701	12218800
	Chr1	11303700	11303800		Chr1	12218901	12219000
	Chr1	11303800	11303900		Chr1	12228801	12228900
	Chr1	11303900	11304000		Chr1	12240501	12240600
	Chr1	11304000	11304100		Chr1	12240801	12240900
	Chr1	11304200	11304300		Chr1	12264601	12264700
	Chr1	11304300	11304400		Chr1	12277501	12277600
	Chr1	11304400	11304500		Chr1	12286701	12286800
	Chr1	11304500	11304600		Chr1	12287501	12287600
	Chr1	11304600	11304700		Chr1	12303001	12303100
	Chr1	11304700	11304800		Chr1	12303101	12303200
	Chr1	11304800	11304900		Chr1	12336801	12336900
	Chr1	11304900	11305000		Chr1	12435401	12435500
	Chr1	11305000	11305100		Chr1	12457701	12457800
	Chr1	11305100	11305200		Chr1	12457901	12458000
	Chr1	11305200	11305300		Chr1	12458101	12458200
	Chr1	11305300	11305400		Chr1	12458201	12458300
	Chr1	11305400	11305500		Chr1	1249901	1250000
	Chr1	11305500	11305600		Chr1	12517401	12517500
	Chr1	11305600	11305700		Chr1	12525601	12525700
	Chr1	11305700	11305800		Chr1	12530301	12530400
	Chr1	11305900	11306000		Chr1	12564001	12564100
	Chr1	11306000	11306100		Chr1	12565701	12565800
	Chr1	11306100	11306200		Chr1	12593501	12593600
	Chr1	11306200	11306300		Chr1	12594701	12594800
	Chr1	11306300	11306400		Chr1	12603801	12603900
	Chr1	11306600	11306700		Chr1	12610801	12610900
	Chr1	11306700	11306800		Chr1	12618501	12618600
	Chr1	11306800	11306900		Chr1	12636601	12636700
	Chr1	11306900	11307000		Chr1	12662801	12662900
	Chr1	11307100	11307200		Chr1	12692301	12692400
	Chr1	11307300	11307400		Chr1	12692401	12692500
	Chr1	11307400	11307500		Chr1	12692601	12692700
	Chr1	11307700	11307800		Chr1	12730101	12730200
	Chr1	11307800	11307900		Chr1	12738301	12738400
	Chr1	11307900	11308000		Chr1	12738401	12738500
	Chr1	11308300	11308400		Chr1	12761401	12761500
	Chr1	11308400	11308500		Chr1	12761501	12761600
	Chr1	11308500	11308600		Chr1	1276501	1276600
	Chr1	11308600	11308700		Chr1	12846001	12846100
	Chr1	11308700	11308800		Chr1	12853901	12854000
	Chr1	11308800	11308900		Chr1	12854001	12854100
	Chr1	11308900	11309000		Chr1	12854201	12854300
	Chr1	11309000	11309100		Chr1	1286801	1286900
	Chr1	11309100	11309200		Chr1	12895301	12895400
	Chr1	11309200	11309300		Chr1	12895401	12895500
	Chr1	11309300	11309400		Chr1	12896301	12896400
	Chr1	11309400	11309500		Chr1	12896401	12896500
	Chr1	11309500	11309600		Chr1	12906201	12906300
	Chr1	11309600	11309700		Chr1	12918701	12918800
	Chr1	11309700	11309800		Chr1	12968601	12968700
	Chr1	11309800	11309900		Chr1	12993501	12993600
	Chr1	11323500	11323600		Chr1	13027901	13028000
	Chr1	11323600	11323700		Chr1	13028101	13028200
	Chr1	11503500	11503600		Chr1	13030401	13030500
	Chr1	11503700	11503800		Chr1	13039401	13039500
	Chr1	11503900	11504000		Chr1	13050001	13050100
	Chr1	11504100	11504200		Chr1	13075701	13075800
	Chr1	11504300	11504400		Chr1	13088301	13088400
	Chr1	11504600	11504700		Chr1	13114801	13114900
	Chr1	11504700	11504800		Chr1	13119401	13119500
	Chr1	11505000	11505100		Chr1	13126901	13127000
	Chr1	11505100	11505200		Chr1	13127001	13127100
	Chr1	11505500	11505600		Chr1	13148401	13148500
	Chr1	11505800	11505900		Chr1	13150301	13150400
	Chr1	11505900	11506000		Chr1	13151301	13151400
	Chr1	11506000	11506100		Chr1	13151401	13151500
	Chr1	11506100	11506200		Chr1	13152601	13152700
	Chr1	11506300	11506400		Chr1	13152701	13152800
	Chr1	11506500	11506600		Chr1	13154101	13154200
	Chr1	11506600	11506700		Chr1	13156201	13156300
	Chr1	11506700	11506800		Chr1	13165301	13165400
	Chr1	11506800	11506900		Chr1	13192301	13192400
	Chr1	11506900	11507000		Chr1	13192501	13192600
	Chr1	11507200	11507300		Chr1	13220001	13220100
	Chr1	11507300	11507400		Chr1	13259401	13259500
	Chr1	11507800	11507900		Chr1	13260301	13260400
	Chr1	11507900	11508000		Chr1	13357101	13357200
	Chr1	11508000	11508100		Chr1	13357301	13357400
	Chr1	11508100	11508200		Chr1	13528801	13528900
	Chr1	11508200	11508300		Chr1	13544601	13544700
	Chr1	11508400	11508500		Chr1	13544701	13544800
	Chr1	11508700	11508800		Chr1	13567001	13567100
	Chr1	11508900	11509000		Chr1	13572401	13572500
	Chr1	11509100	11509200		Chr1	13591101	13591200
	Chr1	11509200	11509300		Chr1	13669101	13669200
	Chr1	11509300	11509400		Chr1	13671201	13671300
	Chr1	11510000	11510100		Chr1	13684601	13684700
	Chr1	11510700	11510800		Chr1	13704101	13704200
	Chr1	11510800	11510900		Chr1	13812401	13812500
	Chr1	11511100	11511200		Chr1	13837901	13838000
	Chr1	11511300	11511400		Chr1	13870101	13870200
	Chr1	11511800	11511900		Chr1	13896301	13896400
	Chr1	11512200	11512300		Chr1	13902001	13902100
	Chr1	11518700	11518800		Chr1	14005601	14005700
	Chr1	11519000	11519100		Chr1	14030801	14030900
	Chr1	11520400	11520500		Chr1	14153001	14153100
	Chr1	11643800	11643900		Chr1	14164301	14164400
	Chr1	11753000	11753100		Chr1	14164401	14164500
	Chr1	11753400	11753500		Chr1	14165901	14166000
	Chr1	11753600	11753700		Chr1	14166001	14166100
	Chr1	11754000	11754100		Chr1	14296501	14296600
	Chr1	11754600	11754700		Chr1	1430301	1430400
	Chr1	11789700	11789800		Chr1	1430401	1430500
	Chr1	11789900	11790000		Chr1	1430601	1430700
	Chr1	11790000	11790100		Chr1	1430801	1430900
	Chr1	11790100	11790200		Chr1	1430901	1431000
	Chr1	11790300	11790400		Chr1	1441501	1441600
	Chr1	11790400	11790500		Chr1	1444301	1444400
	Chr1	11790500	11790600		Chr1	1444401	1444500
	Chr1	11790600	11790700		Chr1	1445401	1445500
	Chr1	11790800	11790900		Chr1	1476501	1476600
	Chr1	11790900	11791000		Chr1	14855101	14855200
	Chr1	11791000	11791100		Chr1	15133401	15133500
	Chr1	11791200	11791300		Chr1	1522901	1523000
	Chr1	11791300	11791400		Chr1	15610301	15610400
	Chr1	11791500	11791600		Chr1	15925501	15925600
	Chr1	11791600	11791700		Chr1	15935501	15935600
	Chr1	11791800	11791900		Chr1	15935601	15935700
	Chr1	11792000	11792100		Chr1	15939301	15939400
	Chr1	11792100	11792200		Chr1	15945301	15945400
	Chr1	11792500	11792600		Chr1	16094901	16095000
	Chr1	11792600	11792700		Chr1	1613201	1613300
	Chr1	11792700	11792800		Chr1	16142501	16142600
	Chr1	11792900	11793000		Chr1	1614601	1614700
	Chr1	11793000	11793100		Chr1	1617701	1617800
	Chr1	11793200	11793300		Chr1	16286801	16286900
	Chr1	11793400	11793500		Chr1	16294301	16294400
	Chr1	11793500	11793600		Chr1	16294401	16294500
	Chr1	11835000	11835100		Chr1	16305501	16305600
	Chr1	11835200	11835300		Chr1	16400501	16400600
	Chr1	11836100	11836200		Chr1	16400901	16401000
	Chr1	11836200	11836300		Chr1	16418601	16418700
	Chr1	11836400	11836500		Chr1	16418701	16418800
	Chr1	11836700	11836800		Chr1	16418901	16419000
	Chr1	11836900	11837000		Chr1	16421101	16421200
	Chr1	11837100	11837200		Chr1	16455201	16455300
	Chr1	11837200	11837300		Chr1	16477601	16477700
	Chr1	11889200	11889300		Chr1	16477701	16477800
	Chr1	11889500	11889600		Chr1	16488901	16489000
	Chr1	11889700	11889800		Chr1	16538501	16538600
	Chr1	11889800	11889900		Chr1	16590801	16590900
	Chr1	11890300	11890400		Chr1	16624501	16624600
	Chr1	11891800	11891900		Chr1	16637301	16637400
	Chr1	11899100	11899200		Chr1	16641101	16641200
	Chr1	11899200	11899300		Chr1	16645901	16646000
	Chr1	11899300	11899400		Chr1	16664201	16664300
	Chr1	11899600	11899700		Chr1	16707801	16707900
	Chr1	11899800	11899900		Chr1	16710001	16710100
	Chr1	11901200	11901300		Chr1	16712501	16712600
	Chr1	11959200	11959300		Chr1	16773601	16773700
	Chr1	11959600	11959700		Chr1	16792401	16792500
	Chr1	11959700	11959800		Chr1	16793601	16793700
	Chr1	11960100	11960200		Chr1	16794301	16794400
	Chr1	11960400	11960500		Chr1	16807801	16807900
	Chr1	12014800	12014900		Chr1	16810801	16810900
	Chr1	12015100	12015200		Chr1	16810901	16811000
	Chr1	12016200	12016300		Chr1	16822801	16822900
	Chr1	12016300	12016400		Chr1	16841101	16841200
	Chr1	12016400	12016500		Chr1	16859101	16859200
	Chr1	12016500	12016600		Chr1	16860601	16860700
	Chr1	12016600	12016700		Chr1	16870801	16870900
	Chr1	12016900	12017000		Chr1	16890901	16891000
	Chr1	12017000	12017100		Chr1	16905101	16905200
	Chr1	12017100	12017200		Chr1	16905701	16905800
	Chr1	12017200	12017300		Chr1	16923201	16923300
	Chr1	12017300	12017400		Chr1	16936801	16936900
	Chr1	12018200	12018300		Chr1	16937901	16938000
	Chr1	12139100	12139200		Chr1	16938001	16938100
	Chr1	12139300	12139400		Chr1	16939101	16939200
	Chr1	12139400	12139500		Chr1	16939301	16939400
	Chr1	12139500	12139600		Chr1	16942801	16942900
	Chr1	12139700	12139800		Chr1	16966101	16966200
	Chr1	12139800	12139900		Chr1	16968101	16968200
	Chr1	12139900	12140000		Chr1	16975301	16975400
	Chr1	12140000	12140100		Chr1	17006901	17007000
	Chr1	12140100	12140200		Chr1	17007201	17007300
	Chr1	12140200	12140300		Chr1	17007301	17007400
	Chr1	12140300	12140400		Chr1	17035101	17035200
	Chr1	12140500	12140600		Chr1	1705401	1705500
	Chr1	12140600	12140700		Chr1	17064801	17064900
	Chr1	12140700	12140800		Chr1	17076901	17077000
	Chr1	12140900	12141000		Chr1	17077001	17077100
	Chr1	12141000	12141100		Chr1	17077201	17077300
	Chr1	12141100	12141200		Chr1	17083001	17083100
	Chr1	12141300	12141400		Chr1	17091501	17091600
	Chr1	12141600	12141700		Chr1	17001	17100
	Chr1	12141700	12141800		Chr1	17151801	17151900
	Chr1	12141800	12141900		Chr1	17152501	17152600
	Chr1	12141900	12142000		Chr1	17152701	17152800
	Chr1	12142000	12142100		Chr1	17152801	17152900
	Chr1	12142100	12142200		Chr1	17193501	17193600
	Chr1	12142200	12142300		Chr1	17239801	17239900
	Chr1	12142600	12142700		Chr1	17267001	17267100
	Chr1	12142700	12142800		Chr1	17267101	17267200
	Chr1	12142800	12142900		Chr1	17267201	17267300
	Chr1	12142900	12143000		Chr1	17267301	17267400
	Chr1	12173000	12173100		Chr1	17267901	17268000
	Chr1	12173200	12173300		Chr1	17268001	17268100
	Chr1	12173500	12173600		Chr1	17282401	17282500
	Chr1	12173600	12173700		Chr1	17282501	17282600
	Chr1	12173700	12173800		Chr1	17289101	17289200
	Chr1	12173900	12174000		Chr1	17289201	17289300
	Chr1	12174200	12174300		Chr1	17293301	17293400
	Chr1	12174300	12174400		Chr1	17295401	17295500
	Chr1	12174400	12174500		Chr1	17300201	17300300
	Chr1	12174500	12174600		Chr1	17305701	17305800
	Chr1	12174600	12174700		Chr1	17312401	17312500
	Chr1	12174700	12174800		Chr1	17324801	17324900
	Chr1	12174800	12174900		Chr1	17333101	17333200
	Chr1	12174900	12175000		Chr1	17335401	17335500
	Chr1	12175400	12175500		Chr1	17335601	17335700
	Chr1	12175500	12175600		Chr1	17341201	17341300
	Chr1	12175600	12175700		Chr1	17346001	17346100
	Chr1	12175700	12175800		Chr1	17369001	17369100
	Chr1	12175900	12176000		Chr1	17369101	17369200
	Chr1	12176000	12176100		Chr1	17369601	17369700
	Chr1	12176100	12176200		Chr1	17369701	17369800
	Chr1	12176200	12176300		Chr1	17382001	17382100
	Chr1	12176300	12176400		Chr1	17384401	17384500
	Chr1	12176600	12176700		Chr1	17404801	17404900
	Chr1	12263800	12263900		Chr1	17448601	17448700
	Chr1	12377400	12377500		Chr1	17502201	17502300
	Chr1	12378500	12378600		Chr1	17502501	17502600
	Chr1	12402000	12402100		Chr1	17551201	17551300
	Chr1	12402100	12402200		Chr1	17563201	17563300
	Chr1	12402200	12402300		Chr1	17563801	17563900
	Chr1	12402400	12402500		Chr1	17605501	17605600
	Chr1	12402700	12402800		Chr1	17605601	17605700
	Chr1	12402800	12402900		Chr1	17607501	17607600
	Chr1	12403000	12403100		Chr1	17632401	17632500
	Chr1	12403200	12403300		Chr1	17632601	17632700
	Chr1	12403600	12403700		Chr1	17665001	17665100
	Chr1	12404000	12404100		Chr1	17666201	17666300
	Chr1	12404200	12404300		Chr1	17673901	17674000
	Chr1	12404300	12404400		Chr1	17685701	17685800
	Chr1	12404400	12404500		Chr1	17685801	17685900
	Chr1	12404900	12405000		Chr1	17689601	17689700
	Chr1	12405000	12405100		Chr1	17689701	17689800
	Chr1	12405100	12405200		Chr1	17690201	17690300
	Chr1	12405300	12405400		Chr1	17690401	17690500
	Chr1	12405500	12405600		Chr1	17690501	17690600
	Chr1	12405600	12405700		Chr1	17714401	17714500
	Chr1	12406200	12406300		Chr1	17714501	17714600
	Chr1	12406300	12406400		Chr1	17727201	17727300
	Chr1	12406400	12406500		Chr1	17766201	17766300
	Chr1	12406500	12406600		Chr1	17820601	17820700
	Chr1	12406700	12406800		Chr1	17840601	17840700
	Chr1	12406800	12406900		Chr1	17840701	17840800
	Chr1	12406900	12407000		Chr1	17874101	17874200
	Chr1	12407000	12407100		Chr1	17874201	17874300
	Chr1	12407100	12407200		Chr1	17899001	17899100
	Chr1	12407200	12407300		Chr1	17937901	17938000
	Chr1	12407400	12407500		Chr1	17978901	17979000
	Chr1	12407700	12407800		Chr1	17979001	17979100
	Chr1	12408000	12408100		Chr1	18010301	18010400
	Chr1	12408200	12408300		Chr1	18019701	18019800
	Chr1	12408300	12408400		Chr1	18029301	18029400
	Chr1	12408400	12408500		Chr1	18055901	18056000
	Chr1	12408500	12408600		Chr1	18056001	18056100
	Chr1	12408600	12408700		Chr1	18088701	18088800
	Chr1	12408800	12408900		Chr1	18096001	18096100
	Chr1	12409000	12409100		Chr1	18001	18100
	Chr1	12409200	12409300		Chr1	18126701	18126800
	Chr1	12409400	12409500		Chr1	18130401	18130500
	Chr1	12409500	12409600		Chr1	18130501	18130600
	Chr1	12409600	12409700		Chr1	18131901	18132000
	Chr1	12409700	12409800		Chr1	18135901	18136000
	Chr1	12409800	12409900		Chr1	18136001	18136100
	Chr1	12409900	12410000		Chr1	18164001	18164100
	Chr1	12410000	12410100		Chr1	18164101	18164200
	Chr1	12467600	12467700		Chr1	18164301	18164400
	Chr1	12467700	12467800		Chr1	18164401	18164500
	Chr1	12555700	12555800		Chr1	18164701	18164800
	Chr1	12555800	12555900		Chr1	18164801	18164900
	Chr1	12557500	12557600		Chr1	18164901	18165000
	Chr1	12558200	12558300		Chr1	18165301	18165400
	Chr1	12558400	12558500		Chr1	18165401	18165500
	Chr1	12569800	12569900		Chr1	18211601	18211700
	Chr1	12569900	12570000		Chr1	18211701	18211800
	Chr1	12571100	12571200		Chr1	18214401	18214500
	Chr1	12571500	12571600		Chr1	18270501	18270600
	Chr1	12594800	12594900		Chr1	18287501	18287600
	Chr1	12595300	12595400		Chr1	18297501	18297600
	Chr1	12628000	12628100		Chr1	18297601	18297700
	Chr1	12629100	12629200		Chr1	18297701	18297800
	Chr1	12630000	12630100		Chr1	18300401	18300500
	Chr1	12651900	12652000		Chr1	18302201	18302300
	Chr1	12665200	12665300		Chr1	18302301	18302400
	Chr1	12665500	12665600		Chr1	18320601	18320700
	Chr1	12667000	12667100		Chr1	18320801	18320900
	Chr1	12667300	12667400		Chr1	18321001	18321100
	Chr1	12667400	12667500		Chr1	18321101	18321200
	Chr1	12667700	12667800		Chr1	18321201	18321300
	Chr1	12668200	12668300		Chr1	18321301	18321400
	Chr1	12668300	12668400		Chr1	18342101	18342200
	Chr1	12669300	12669400		Chr1	18380301	18380400
	Chr1	12672200	12672300		Chr1	18381001	18381100
	Chr1	12672500	12672600		Chr1	18386401	18386500
	Chr1	12672900	12673000		Chr1	18387401	18387500
	Chr1	12673000	12673100		Chr1	18415301	18415400
	Chr1	12673100	12673200		Chr1	18437201	18437300
	Chr1	12673200	12673300		Chr1	18437901	18438000
	Chr1	12673300	12673400		Chr1	18438001	18438100
	Chr1	12674400	12674500		Chr1	18438101	18438200
	Chr1	12674700	12674800		Chr1	18450301	18450400
	Chr1	12674800	12674900		Chr1	18456801	18456900
	Chr1	12674900	12675000		Chr1	18456901	18457000
	Chr1	12675200	12675300		Chr1	18493701	18493800
	Chr1	12675400	12675500		Chr1	18401	18500
	Chr1	12675500	12675600		Chr1	18548101	18548200
	Chr1	12675600	12675700		Chr1	18548201	18548300
	Chr1	12675700	12675800		Chr1	18548301	18548400
	Chr1	12675800	12675900		Chr1	18549401	18549500
	Chr1	12675900	12676000		Chr1	18549501	18549600
	Chr1	12676000	12676100		Chr1	18551601	18551700
	Chr1	12676200	12676300		Chr1	18599001	18599100
	Chr1	12676300	12676400		Chr1	18627101	18627200
	Chr1	12676400	12676500		Chr1	18627201	18627300
	Chr1	12676700	12676800		Chr1	18632101	18632200
	Chr1	12676900	12677000		Chr1	18632201	18632300
	Chr1	12677000	12677100		Chr1	18632401	18632500
	Chr1	12677200	12677300		Chr1	18632601	18632700
	Chr1	12677400	12677500		Chr1	18632901	18633000
	Chr1	12677500	12677600		Chr1	18601	18700
	Chr1	12677600	12677700		Chr1	18765801	18765900
	Chr1	12677700	12677800		Chr1	18766501	18766600
	Chr1	12677800	12677900		Chr1	18805001	18805100
	Chr1	12677900	12678000		Chr1	1881901	1882000
	Chr1	12678000	12678100		Chr1	1882101	1882200
	Chr1	12678100	12678200		Chr1	1882201	1882300
	Chr1	12678200	12678300		Chr1	18859301	18859400
	Chr1	12678300	12678400		Chr1	18859501	18859600
	Chr1	12678400	12678500		Chr1	18859601	18859700
	Chr1	12678500	12678600		Chr1	18887801	18887900
	Chr1	12678600	12678700		Chr1	18895101	18895200
	Chr1	12678700	12678800		Chr1	18925001	18925100
	Chr1	12679000	12679100		Chr1	18931001	18931100
	Chr1	12679200	12679300		Chr1	18931101	18931200
	Chr1	12679300	12679400		Chr1	18989501	18989600
	Chr1	12679400	12679500		Chr1	19027601	19027700
	Chr1	12679500	12679600		Chr1	19027701	19027800
	Chr1	12679600	12679700		Chr1	19054401	19054500
	Chr1	12679700	12679800		Chr1	19064401	19064500
	Chr1	12679900	12680000		Chr1	19086301	19086400
	Chr1	12680300	12680400		Chr1	19086401	19086500
	Chr1	12680400	12680500		Chr1	19086501	19086600
	Chr1	12680700	12680800		Chr1	19086601	19086700
	Chr1	12680800	12680900		Chr1	19086701	19086800
	Chr1	12680900	12681000		Chr1	19145601	19145700
	Chr1	12681100	12681200		Chr1	19172301	19172400
	Chr1	12681200	12681300		Chr1	19173701	19173800
	Chr1	12681300	12681400		Chr1	19180301	19180400
	Chr1	12681500	12681600		Chr1	19197901	19198000
	Chr1	12681600	12681700		Chr1	19198101	19198200
	Chr1	12681700	12681800		Chr1	19198201	19198300
	Chr1	12681800	12681900		Chr1	19219901	19220000
	Chr1	12682000	12682100		Chr1	19220001	19220100
	Chr1	12682100	12682200		Chr1	19226301	19226400
	Chr1	12682300	12682400		Chr1	19226401	19226500
	Chr1	12682500	12682600		Chr1	19237301	19237400
	Chr1	12682600	12682700		Chr1	19249301	19249400
	Chr1	12682700	12682800		Chr1	19303801	19303900
	Chr1	12682900	12683000		Chr1	19304001	19304100
	Chr1	12683100	12683200		Chr1	19304101	19304200
	Chr1	12683300	12683400		Chr1	19304401	19304500
	Chr1	12683600	12683700		Chr1	19328201	19328300
	Chr1	12683700	12683800		Chr1	19328301	19328400
	Chr1	12683800	12683900		Chr1	19336301	19336400
	Chr1	12683900	12684000		Chr1	19352801	19352900
	Chr1	12684000	12684100		Chr1	19352901	19353000
	Chr1	12684100	12684200		Chr1	19353301	19353400
	Chr1	12684200	12684300		Chr1	19353401	19353500
	Chr1	12684300	12684400		Chr1	19354201	19354300
	Chr1	12684400	12684500		Chr1	19380601	19380700
	Chr1	12684700	12684800		Chr1	19388201	19388300
	Chr1	12715300	12715400		Chr1	19398501	19398600
	Chr1	12715400	12715500		Chr1	19403301	19403400
	Chr1	12715800	12715900		Chr1	19424901	19425000
	Chr1	12715900	12716000		Chr1	19426901	19427000
	Chr1	12716200	12716300		Chr1	19430401	19430500
	Chr1	12716900	12717000		Chr1	19476501	19476600
	Chr1	12717500	12717600		Chr1	19498001	19498100
	Chr1	12717900	12718000		Chr1	19577501	19577600
	Chr1	12718200	12718300		Chr1	19655501	19655600
	Chr1	12718300	12718400		Chr1	19665901	19666000
	Chr1	12718400	12718500		Chr1	19666001	19666100
	Chr1	12718500	12718600		Chr1	19704301	19704400
	Chr1	12718700	12718800		Chr1	19728501	19728600
	Chr1	12718900	12719000		Chr1	19736501	19736600
	Chr1	12719100	12719200		Chr1	19741501	19741600
	Chr1	12719300	12719400		Chr1	19741901	19742000
	Chr1	12719700	12719800		Chr1	19742001	19742100
	Chr1	12719800	12719900		Chr1	19743701	19743800
	Chr1	12719900	12720000		Chr1	19744201	19744300
	Chr1	12720200	12720300		Chr1	19744301	19744400
	Chr1	12720600	12720700		Chr1	1975101	1975200
	Chr1	12720700	12720800		Chr1	1975201	1975300
	Chr1	12721500	12721600		Chr1	1975301	1975400
	Chr1	12721700	12721800		Chr1	1975401	1975500
	Chr1	12722100	12722200		Chr1	19768601	19768700
	Chr1	12722400	12722500		Chr1	19768701	19768800
	Chr1	12723100	12723200		Chr1	19769301	19769400
	Chr1	12723200	12723300		Chr1	19769401	19769500
	Chr1	12723400	12723500		Chr1	19769601	19769700
	Chr1	12723800	12723900		Chr1	19780301	19780400
	Chr1	12723900	12724000		Chr1	19780401	19780500
	Chr1	12724500	12724600		Chr1	19780501	19780600
	Chr1	12724700	12724800		Chr1	19780701	19780800
	Chr1	12724800	12724900		Chr1	19780801	19780900
	Chr1	12724900	12725000		Chr1	19780901	19781000
	Chr1	12725000	12725100		Chr1	19781001	19781100
	Chr1	12725200	12725300		Chr1	19798901	19799000
	Chr1	12725400	12725500		Chr1	19808101	19808200
	Chr1	12725600	12725700		Chr1	19809801	19809900
	Chr1	12726000	12726100		Chr1	19809901	19810000
	Chr1	12726300	12726400		Chr1	19861401	19861500
	Chr1	12726500	12726600		Chr1	19909101	19909200
	Chr1	12726700	12726800		Chr1	19941401	19941500
	Chr1	12726800	12726900		Chr1	19944301	19944400
	Chr1	12726900	12727000		Chr1	19944401	19944500
	Chr1	12727000	12727100		Chr1	19944501	19944600
	Chr1	12727300	12727400		Chr1	19945301	19945400
	Chr1	12727500	12727600		Chr1	19993801	19993900
	Chr1	12727700	12727800		Chr1	19994901	19995000
	Chr1	12727800	12727900		Chr1	20024201	20024300
	Chr1	12727900	12728000		Chr1	20033501	20033600
	Chr1	12728000	12728100		Chr1	20115501	20115600
	Chr1	12728300	12728400		Chr1	20166701	20166800
	Chr1	12728700	12728800		Chr1	20166801	20166900
	Chr1	12732700	12732800		Chr1	20167501	20167600
	Chr1	12732800	12732900		Chr1	20172201	20172300
	Chr1	12733400	12733500		Chr1	20172301	20172400
	Chr1	12754200	12754300		Chr1	20172701	20172800
	Chr1	12757900	12758000		Chr1	20174401	20174500
	Chr1	12768300	12768400		Chr1	20175101	20175200
	Chr1	12771400	12771500		Chr1	20194501	20194600
	Chr1	12774800	12774900		Chr1	20205301	20205400
	Chr1	12781100	12781200		Chr1	20205501	20205600
	Chr1	12781400	12781500		Chr1	20205601	20205700
	Chr1	12781600	12781700		Chr1	20205801	20205900
	Chr1	12782000	12782100		Chr1	20206801	20206900
	Chr1	12788800	12788900		Chr1	20312001	20312100
	Chr1	12798100	12798200		Chr1	20320501	20320600
	Chr1	12802300	12802400		Chr1	20362901	20363000
	Chr1	12819500	12819600		Chr1	20363101	20363200
	Chr1	12820400	12820500		Chr1	20403501	20403600
	Chr1	12820900	12821000		Chr1	20412301	20412400
	Chr1	12821000	12821100		Chr1	20432201	20432300
	Chr1	12821100	12821200		Chr1	20433001	20433100
	Chr1	12821300	12821400		Chr1	20489001	20489100
	Chr1	12821400	12821500		Chr1	20499001	20499100
	Chr1	12821500	12821600		Chr1	20509301	20509400
	Chr1	12821800	12821900		Chr1	20513701	20513800
	Chr1	12821900	12822000		Chr1	20514201	20514300
	Chr1	12822000	12822100		Chr1	20514301	20514400
	Chr1	12822200	12822300		Chr1	20514501	20514600
	Chr1	12822300	12822400		Chr1	20548101	20548200
	Chr1	12822900	12823000		Chr1	20559601	20559700
	Chr1	12823700	12823800		Chr1	20559701	20559800
	Chr1	12824600	12824700		Chr1	20559801	20559900
	Chr1	12825200	12825300		Chr1	20560201	20560300
	Chr1	12827200	12827300		Chr1	20565001	20565100
	Chr1	12828300	12828400		Chr1	20569101	20569200
	Chr1	12830500	12830600		Chr1	20622701	20622800
	Chr1	12831000	12831100		Chr1	20624901	20625000
	Chr1	12832600	12832700		Chr1	20683301	20683400
	Chr1	12833700	12833800		Chr1	20683501	20683600
	Chr1	12834300	12834400		Chr1	20683601	20683700
	Chr1	12834900	12835000		Chr1	20697101	20697200
	Chr1	12835100	12835200		Chr1	20697201	20697300
	Chr1	12835400	12835500		Chr1	20699801	20699900
	Chr1	12835600	12835700		Chr1	20699901	20700000
	Chr1	12835900	12836000		Chr1	20703901	20704000
	Chr1	12836500	12836600		Chr1	20704301	20704400
	Chr1	12836600	12836700		Chr1	20704401	20704500
	Chr1	12836900	12837000		Chr1	20704501	20704600
	Chr1	12837300	12837400		Chr1	20734101	20734200
	Chr1	12837500	12837600		Chr1	20734201	20734300
	Chr1	12837600	12837700		Chr1	20823601	20823700
	Chr1	12837900	12838000		Chr1	20826901	20827000
	Chr1	12838000	12838100		Chr1	20914901	20915000
	Chr1	12838100	12838200		Chr1	20972501	20972600
	Chr1	12838200	12838300		Chr1	20979401	20979500
	Chr1	12838300	12838400		Chr1	20979701	20979800
	Chr1	12838400	12838500		Chr1	21021101	21021200
	Chr1	12838600	12838700		Chr1	21055101	21055200
	Chr1	12838700	12838800		Chr1	21105101	21105200
	Chr1	12838900	12839000		Chr1	21105601	21105700
	Chr1	12839000	12839100		Chr1	21105701	21105800
	Chr1	12839100	12839200		Chr1	21120401	21120500
	Chr1	12848400	12848500		Chr1	21128701	21128800
	Chr1	12848600	12848700		Chr1	21128801	21128900
	Chr1	12856100	12856200		Chr1	21145701	21145800
	Chr1	12856300	12856400		Chr1	21211201	21211300
	Chr1	12856800	12856900		Chr1	21228801	21228900
	Chr1	12857200	12857300		Chr1	21228901	21229000
	Chr1	12857300	12857400		Chr1	21260101	21260200
	Chr1	12857400	12857500		Chr1	21311801	21311900
	Chr1	12857500	12857600		Chr1	21341501	21341600
	Chr1	12857800	12857900		Chr1	21341601	21341700
	Chr1	12858100	12858200		Chr1	21342401	21342500
	Chr1	12858300	12858400		Chr1	21392501	21392600
	Chr1	12858500	12858600		Chr1	21392601	21392700
	Chr1	12858600	12858700		Chr1	21392801	21392900
	Chr1	12859200	12859300		Chr1	21392901	21393000
	Chr1	12859400	12859500		Chr1	21418601	21418700
	Chr1	12859500	12859600		Chr1	21428401	21428500
	Chr1	12859600	12859700		Chr1	21470201	21470300
	Chr1	12859700	12859800		Chr1	21470301	21470400
	Chr1	12859900	12860000		Chr1	21471601	21471700
	Chr1	12860200	12860300		Chr1	21471701	21471800
	Chr1	12860400	12860500		Chr1	21471801	21471900
	Chr1	12860700	12860800		Chr1	21471901	21472000
	Chr1	12860800	12860900		Chr1	21472101	21472200
	Chr1	12860900	12861000		Chr1	21507701	21507800
	Chr1	12861600	12861700		Chr1	21508001	21508100
	Chr1	12861900	12862000		Chr1	21510001	21510100
	Chr1	12864900	12865000		Chr1	21525001	21525100
	Chr1	12865600	12865700		Chr1	21529701	21529800
	Chr1	12906000	12906100		Chr1	21615301	21615400
	Chr1	12907300	12907400		Chr1	21615401	21615500
	Chr1	12907400	12907500		Chr1	21616001	21616100
	Chr1	12907900	12908000		Chr1	21616101	21616200
	Chr1	12942900	12943000		Chr1	21628701	21628800
	Chr1	12944000	12944100		Chr1	21628801	21628900
	Chr1	12944800	12944900		Chr1	21640501	21640600
	Chr1	12945400	12945500		Chr1	21640701	21640800
	Chr1	12951700	12951800		Chr1	21739101	21739200
	Chr1	12951900	12952000		Chr1	21739501	21739600
	Chr1	12952700	12952800		Chr1	21741601	21741700
	Chr1	12996800	12996900		Chr1	21741701	21741800
	Chr1	12997600	12997700		Chr1	21741801	21741900
	Chr1	12997700	12997800		Chr1	21744101	21744200
	Chr1	12998600	12998700		Chr1	21744201	21744300
	Chr1	12998900	12999000		Chr1	21744901	21745000
	Chr1	12999200	12999300		Chr1	21745001	21745100
	Chr1	12999300	12999400		Chr1	21786901	21787000
	Chr1	12999600	12999700		Chr1	21787001	21787100
	Chr1	12999800	12999900		Chr1	21790801	21790900
	Chr1	12999900	13000000		Chr1	21802601	21802700
	Chr1	13000000	13000100		Chr1	21823101	21823200
	Chr1	13000600	13000700		Chr1	21823201	21823300
	Chr1	13000800	13000900		Chr1	21823301	21823400
	Chr1	13001200	13001300		Chr1	21838901	21839000
	Chr1	13001300	13001400		Chr1	21853801	21853900
	Chr1	13001400	13001500		Chr1	21858001	21858100
	Chr1	13001500	13001600		Chr1	21918901	21919000
	Chr1	13001600	13001700		Chr1	21976901	21977000
	Chr1	13001800	13001900		Chr1	21991201	21991300
	Chr1	13001900	13002000		Chr1	21995501	21995600
	Chr1	13002500	13002600		Chr1	21996101	21996200
	Chr1	13002700	13002800		Chr1	22025001	22025100
	Chr1	13002800	13002900		Chr1	22042801	22042900
	Chr1	13002900	13003000		Chr1	22085301	22085400
	Chr1	13003000	13003100		Chr1	22089101	22089200
	Chr1	13003300	13003400		Chr1	22089701	22089800
	Chr1	13003400	13003500		Chr1	22112101	22112200
	Chr1	13003700	13003800		Chr1	22112201	22112300
	Chr1	13003800	13003900		Chr1	22112601	22112700
	Chr1	13003900	13004000		Chr1	22112701	22112800
	Chr1	13004300	13004400		Chr1	22166701	22166800
	Chr1	13004400	13004500		Chr1	22166801	22166900
	Chr1	13004600	13004700		Chr1	22167001	22167100
	Chr1	13004700	13004800		Chr1	22167201	22167300
	Chr1	13005000	13005100		Chr1	22167601	22167700
	Chr1	13005500	13005600		Chr1	22167801	22167900
	Chr1	13005700	13005800		Chr1	22192001	22192100
	Chr1	13006200	13006300		Chr1	22192201	22192300
	Chr1	13006500	13006600		Chr1	22192401	22192500
	Chr1	13006600	13006700		Chr1	22224701	22224800
	Chr1	13006800	13006900		Chr1	22261101	22261200
	Chr1	13006900	13007000		Chr1	22261301	22261400
	Chr1	13007000	13007100		Chr1	2233801	2233900
	Chr1	13007100	13007200		Chr1	2233901	2234000
	Chr1	13007200	13007300		Chr1	2234101	2234200
	Chr1	13007300	13007400		Chr1	2234201	2234300
	Chr1	13007400	13007500		Chr1	22443601	22443700
	Chr1	13007500	13007600		Chr1	22443701	22443800
	Chr1	13007800	13007900		Chr1	22443801	22443900
	Chr1	13008100	13008200		Chr1	22447401	22447500
	Chr1	13008600	13008700		Chr1	22447501	22447600
	Chr1	13008800	13008900		Chr1	22451301	22451400
	Chr1	13009000	13009100		Chr1	22451801	22451900
	Chr1	13009200	13009300		Chr1	22482701	22482800
	Chr1	13009500	13009600		Chr1	22482801	22482900
	Chr1	13009700	13009800		Chr1	22542101	22542200
	Chr1	13009800	13009900		Chr1	22542201	22542300
	Chr1	13009900	13010000		Chr1	22562701	22562800
	Chr1	13010000	13010100		Chr1	22563501	22563600
	Chr1	13010100	13010200		Chr1	22563601	22563700
	Chr1	13010800	13010900		Chr1	22592601	22592700
	Chr1	13010900	13011000		Chr1	22620901	22621000
	Chr1	13011000	13011100		Chr1	22693901	22694000
	Chr1	13011200	13011300		Chr1	22694001	22694100
	Chr1	13011300	13011400		Chr1	22694101	22694200
	Chr1	13011500	13011600		Chr1	22699301	22699400
	Chr1	13011600	13011700		Chr1	22743101	22743200
	Chr1	13012000	13012100		Chr1	22751601	22751700
	Chr1	13012200	13012300		Chr1	22751701	22751800
	Chr1	13012700	13012800		Chr1	22828601	22828700
	Chr1	13018800	13018900		Chr1	22828901	22829000
	Chr1	13019500	13019600		Chr1	22829001	22829100
	Chr1	13019900	13020000		Chr1	22829101	22829200
	Chr1	13020800	13020900		Chr1	22829201	22829300
	Chr1	13021400	13021500		Chr1	22855601	22855700
	Chr1	13021500	13021600		Chr1	22872201	22872300
	Chr1	13021800	13021900		Chr1	22872301	22872400
	Chr1	13022000	13022100		Chr1	22872801	22872900
	Chr1	13022200	13022300		Chr1	22872901	22873000
	Chr1	13024000	13024100		Chr1	22887901	22888000
	Chr1	13084200	13084300		Chr1	22888101	22888200
	Chr1	13099000	13099100		Chr1	22889501	22889600
	Chr1	13100000	13100100		Chr1	22890601	22890700
	Chr1	13101800	13101900		Chr1	22985301	22985400
	Chr1	13102500	13102600		Chr1	22985401	22985500
	Chr1	13110800	13110900		Chr1	22985501	22985600
	Chr1	13127200	13127300		Chr1	22992201	22992300
	Chr1	13127300	13127400		Chr1	23033401	23033500
	Chr1	13127400	13127500		Chr1	23068201	23068300
	Chr1	13127500	13127600		Chr1	23068301	23068400
	Chr1	13127700	13127800		Chr1	23118501	23118600
	Chr1	13131400	13131500		Chr1	23125101	23125200
	Chr1	13131500	13131600		Chr1	23125201	23125300
	Chr1	13131600	13131700		Chr1	23125301	23125400
	Chr1	13131700	13131800		Chr1	23125601	23125700
	Chr1	13131800	13131900		Chr1	23152501	23152600
	Chr1	13131900	13132000		Chr1	23152701	23152800
	Chr1	13132000	13132100		Chr1	23152801	23152900
	Chr1	13132400	13132500		Chr1	23152901	23153000
	Chr1	13132700	13132800		Chr1	23153201	23153300
	Chr1	13132800	13132900		Chr1	23160901	23161000
	Chr1	13133200	13133300		Chr1	23174501	23174600
	Chr1	13133300	13133400		Chr1	23174901	23175000
	Chr1	13133600	13133700		Chr1	23197401	23197500
	Chr1	13133700	13133800		Chr1	23213601	23213700
	Chr1	13134400	13134500		Chr1	23214801	23214900
	Chr1	13134900	13135000		Chr1	23240301	23240400
	Chr1	13135500	13135600		Chr1	23247001	23247100
	Chr1	13135600	13135700		Chr1	23247201	23247300
	Chr1	13135900	13136000		Chr1	23280501	23280600
	Chr1	13136100	13136200		Chr1	23295601	23295700
	Chr1	13136800	13136900		Chr1	23295701	23295800
	Chr1	13137200	13137300		Chr1	23295801	23295900
	Chr1	13137500	13137600		Chr1	23296901	23297000
	Chr1	13137600	13137700		Chr1	23297001	23297100
	Chr1	13138000	13138100		Chr1	23297201	23297300
	Chr1	13138500	13138600		Chr1	23321501	23321600
	Chr1	13138800	13138900		Chr1	23321601	23321700
	Chr1	13138900	13139000		Chr1	2340201	2340300
	Chr1	13139200	13139300		Chr1	2340301	2340400
	Chr1	13139300	13139400		Chr1	23424901	23425000
	Chr1	13139400	13139500		Chr1	23430901	23431000
	Chr1	13139500	13139600		Chr1	23431001	23431100
	Chr1	13139800	13139900		Chr1	23435801	23435900
	Chr1	13148600	13148700		Chr1	23509601	23509700
	Chr1	13148700	13148800		Chr1	23521701	23521800
	Chr1	13148800	13148900		Chr1	23553901	23554000
	Chr1	13149000	13149100		Chr1	23554301	23554400
	Chr1	13149200	13149300		Chr1	23566401	23566500
	Chr1	13149600	13149700		Chr1	23566501	23566600
	Chr1	13149700	13149800		Chr1	23586501	23586600
	Chr1	13174100	13174200		Chr1	23613701	23613800
	Chr1	13174200	13174300		Chr1	23614001	23614100
	Chr1	13174800	13174900		Chr1	23651601	23651700
	Chr1	13175100	13175200		Chr1	23651701	23651800
	Chr1	13175400	13175500		Chr1	23710101	23710200
	Chr1	13175600	13175700		Chr1	23710201	23710300
	Chr1	13175700	13175800		Chr1	23723601	23723700
	Chr1	13176100	13176200		Chr1	23723801	23723900
	Chr1	13176200	13176300		Chr1	23723901	23724000
	Chr1	13176500	13176600		Chr1	23875301	23875400
	Chr1	13176700	13176800		Chr1	23875401	23875500
	Chr1	13177800	13177900		Chr1	23907201	23907300
	Chr1	13178000	13178100		Chr1	23925201	23925300
	Chr1	13179500	13179600		Chr1	23925501	23925600
	Chr1	13179700	13179800		Chr1	23940801	23940900
	Chr1	13179800	13179900		Chr1	23947001	23947100
	Chr1	13180000	13180100		Chr1	24027201	24027300
	Chr1	13180300	13180400		Chr1	24082701	24082800
	Chr1	13180400	13180500		Chr1	24126001	24126100
	Chr1	13180500	13180600		Chr1	24241401	24241500
	Chr1	13181200	13181300		Chr1	24241501	24241600
	Chr1	13182200	13182300		Chr1	24250901	24251000
	Chr1	13183100	13183200		Chr1	24317401	24317500
	Chr1	13183400	13183500		Chr1	24350701	24350800
	Chr1	13183900	13184000		Chr1	24350801	24350900
	Chr1	13184400	13184500		Chr1	24352901	24353000
	Chr1	13184500	13184600		Chr1	24385101	24385200
	Chr1	13184900	13185000		Chr1	24468001	24468100
	Chr1	13185100	13185200		Chr1	24484601	24484700
	Chr1	13186000	13186100		Chr1	24488101	24488200
	Chr1	13186200	13186300		Chr1	24506501	24506600
	Chr1	13187300	13187400		Chr1	24532001	24532100
	Chr1	13187500	13187600		Chr1	24532101	24532200
	Chr1	13187600	13187700		Chr1	24553901	24554000
	Chr1	13187700	13187800		Chr1	24554001	24554100
	Chr1	13187900	13188000		Chr1	24593501	24593600
	Chr1	13188200	13188300		Chr1	24605401	24605500
	Chr1	13188300	13188400		Chr1	24645501	24645600
	Chr1	13188500	13188600		Chr1	24645701	24645800
	Chr1	13188600	13188700		Chr1	24645801	24645900
	Chr1	13188700	13188800		Chr1	24645901	24646000
	Chr1	13188800	13188900		Chr1	24646001	24646100
	Chr1	13188900	13189000		Chr1	24705101	24705200
	Chr1	13189000	13189100		Chr1	24705801	24705900
	Chr1	13189100	13189200		Chr1	24705901	24706000
	Chr1	13189200	13189300		Chr1	24718401	24718500
	Chr1	13189300	13189400		Chr1	24718501	24718600
	Chr1	13189400	13189500		Chr1	2473001	2473100
	Chr1	13189500	13189600		Chr1	2473101	2473200
	Chr1	13189600	13189700		Chr1	2473201	2473300
	Chr1	13189800	13189900		Chr1	24733101	24733200
	Chr1	13189900	13190000		Chr1	24741101	24741200
	Chr1	13190000	13190100		Chr1	24742001	24742100
	Chr1	13190200	13190300		Chr1	24742101	24742200
	Chr1	13190300	13190400		Chr1	24745201	24745300
	Chr1	13190900	13191000		Chr1	24745301	24745400
	Chr1	13191200	13191300		Chr1	24776601	24776700
	Chr1	13191300	13191400		Chr1	24776801	24776900
	Chr1	13191400	13191500		Chr1	24831601	24831700
	Chr1	13191500	13191600		Chr1	24832501	24832600
	Chr1	13191600	13191700		Chr1	24832601	24832700
	Chr1	13191700	13191800		Chr1	24835301	24835400
	Chr1	13191900	13192000		Chr1	24838601	24838700
	Chr1	13192000	13192100		Chr1	24838701	24838800
	Chr1	13231200	13231300		Chr1	24871901	24872000
	Chr1	13231300	13231400		Chr1	24894201	24894300
	Chr1	13231400	13231500		Chr1	24908501	24908600
	Chr1	13231500	13231600		Chr1	24917601	24917700
	Chr1	13265100	13265200		Chr1	24948301	24948400
	Chr1	13265200	13265300		Chr1	25033601	25033700
	Chr1	13265300	13265400		Chr1	25033801	25033900
	Chr1	13265400	13265500		Chr1	25056401	25056500
	Chr1	13266500	13266600		Chr1	25097901	25098000
	Chr1	13266800	13266900		Chr1	25159001	25159100
	Chr1	13267400	13267500		Chr1	25180101	25180200
	Chr1	13267800	13267900		Chr1	25180201	25180300
	Chr1	13269700	13269800		Chr1	25266001	25266100
	Chr1	13273500	13273600		Chr1	2531501	2531600
	Chr1	13273600	13273700		Chr1	2531601	2531700
	Chr1	13273700	13273800		Chr1	25357801	25357900
	Chr1	13274600	13274700		Chr1	25358301	25358400
	Chr1	13274700	13274800		Chr1	25400601	25400700
	Chr1	13275800	13275900		Chr1	25401201	25401300
	Chr1	13287400	13287500		Chr1	25401301	25401400
	Chr1	13287600	13287700		Chr1	25401401	25401500
	Chr1	13293300	13293400		Chr1	25505201	25505300
	Chr1	13294200	13294300		Chr1	25613301	25613400
	Chr1	13294900	13295000		Chr1	25613401	25613500
	Chr1	13295300	13295400		Chr1	25613601	25613700
	Chr1	13295700	13295800		Chr1	256201	256300
	Chr1	13296000	13296100		Chr1	25639701	25639800
	Chr1	13296200	13296300		Chr1	25641501	25641600
	Chr1	13296700	13296800		Chr1	25641701	25641800
	Chr1	13297000	13297100		Chr1	25660201	25660300
	Chr1	13297800	13297900		Chr1	25675901	25676000
	Chr1	13297900	13298000		Chr1	25696601	25696700
	Chr1	13299100	13299200		Chr1	25722601	25722700
	Chr1	13300100	13300200		Chr1	25723401	25723500
	Chr1	13300300	13300400		Chr1	25723501	25723600
	Chr1	13325300	13325400		Chr1	25730101	25730200
	Chr1	13325500	13325600		Chr1	25730201	25730300
	Chr1	13325600	13325700		Chr1	25751801	25751900
	Chr1	13325900	13326000		Chr1	25751901	25752000
	Chr1	13326100	13326200		Chr1	25779701	25779800
	Chr1	13326300	13326400		Chr1	25779901	25780000
	Chr1	13326400	13326500		Chr1	25780001	25780100
	Chr1	13326800	13326900		Chr1	25780101	25780200
	Chr1	13327600	13327700		Chr1	25819201	25819300
	Chr1	13327700	13327800		Chr1	258101	258200
	Chr1	13328100	13328200		Chr1	258601	258700
	Chr1	13328500	13328600		Chr1	2588101	2588200
	Chr1	13328700	13328800		Chr1	2588201	2588300
	Chr1	13328800	13328900		Chr1	2588301	2588400
	Chr1	13329200	13329300		Chr1	25896501	25896600
	Chr1	13331500	13331600		Chr1	25896601	25896700
	Chr1	13331600	13331700		Chr1	25962601	25962700
	Chr1	13331700	13331800		Chr1	25973801	25973900
	Chr1	13333200	13333300		Chr1	25973901	25974000
	Chr1	13333300	13333400		Chr1	25976901	25977000
	Chr1	13333400	13333500		Chr1	26084001	26084100
	Chr1	13334000	13334100		Chr1	26084101	26084200
	Chr1	13334100	13334200		Chr1	26084201	26084300
	Chr1	13334500	13334600		Chr1	26140001	26140100
	Chr1	13334600	13334700		Chr1	26140101	26140200
	Chr1	13335000	13335100		Chr1	26170101	26170200
	Chr1	13335200	13335300		Chr1	26171401	26171500
	Chr1	13335400	13335500		Chr1	26196301	26196400
	Chr1	13335800	13335900		Chr1	26196401	26196500
	Chr1	13335900	13336000		Chr1	26196601	26196700
	Chr1	13336200	13336300		Chr1	26196701	26196800
	Chr1	13336500	13336600		Chr1	26196901	26197000
	Chr1	13336600	13336700		Chr1	26197001	26197100
	Chr1	13336700	13336800		Chr1	26197201	26197300
	Chr1	13336900	13337000		Chr1	26197301	26197400
	Chr1	13337300	13337400		Chr1	26306901	26307000
	Chr1	13337400	13337500		Chr1	26307001	26307100
	Chr1	13337500	13337600		Chr1	26307101	26307200
	Chr1	13337900	13338000		Chr1	26307201	26307300
	Chr1	13338000	13338100		Chr1	26307401	26307500
	Chr1	13338300	13338400		Chr1	26336001	26336100
	Chr1	13338500	13338600		Chr1	26366701	26366800
	Chr1	13338600	13338700		Chr1	26374501	26374600
	Chr1	13339000	13339100		Chr1	26375001	26375100
	Chr1	13374600	13374700		Chr1	26510801	26510900
	Chr1	13377700	13377800		Chr1	26511101	26511200
	Chr1	13380100	13380200		Chr1	26551501	26551600
	Chr1	13393500	13393600		Chr1	26551601	26551700
	Chr1	13398500	13398600		Chr1	26551801	26551900
	Chr1	13398800	13398900		Chr1	26551901	26552000
	Chr1	13399800	13399900		Chr1	26552001	26552100
	Chr1	13400000	13400100		Chr1	2657701	2657800
	Chr1	13400100	13400200		Chr1	2657801	2657900
	Chr1	13400200	13400300		Chr1	26583001	26583100
	Chr1	13400300	13400400		Chr1	26650801	26650900
	Chr1	13400400	13400500		Chr1	26722301	26722400
	Chr1	13400500	13400600		Chr1	26722401	26722500
	Chr1	13400800	13400900		Chr1	26779201	26779300
	Chr1	13401200	13401300		Chr1	26780601	26780700
	Chr1	13412200	13412300		Chr1	26781001	26781100
	Chr1	13439700	13439800		Chr1	26880201	26880300
	Chr1	13439800	13439900		Chr1	26880301	26880400
	Chr1	13440000	13440100		Chr1	26880401	26880500
	Chr1	13440200	13440300		Chr1	26880601	26880700
	Chr1	13440500	13440600		Chr1	26880701	26880800
	Chr1	13440600	13440700		Chr1	26881001	26881100
	Chr1	13440700	13440800		Chr1	26881201	26881300
	Chr1	13441000	13441100		Chr1	27118101	27118200
	Chr1	13441500	13441600		Chr1	27240701	27240800
	Chr1	13441600	13441700		Chr1	27241001	27241100
	Chr1	13441900	13442000		Chr1	27241101	27241200
	Chr1	13442000	13442100		Chr1	27241201	27241300
	Chr1	13442200	13442300		Chr1	27428501	27428600
	Chr1	13442300	13442400		Chr1	27428601	27428700
	Chr1	13442400	13442500		Chr1	27429301	27429400
	Chr1	13442500	13442600		Chr1	27440601	27440700
	Chr1	13442600	13442700		Chr1	27440701	27440800
	Chr1	13442700	13442800		Chr1	27597401	27597500
	Chr1	13442800	13442900		Chr1	27597501	27597600
	Chr1	13442900	13443000		Chr1	27710501	27710600
	Chr1	13443000	13443100		Chr1	27710601	27710700
	Chr1	13443100	13443200		Chr1	27859701	27859800
	Chr1	13443200	13443300		Chr1	27860701	27860800
	Chr1	13443300	13443400		Chr1	2800601	2800700
	Chr1	13443400	13443500		Chr1	28051401	28051500
	Chr1	13443600	13443700		Chr1	28051501	28051600
	Chr1	13443900	13444000		Chr1	28051601	28051700
	Chr1	13444100	13444200		Chr1	28105501	28105600
	Chr1	13444300	13444400		Chr1	28105701	28105800
	Chr1	13444400	13444500		Chr1	28161601	28161700
	Chr1	13444500	13444600		Chr1	28162101	28162200
	Chr1	13444600	13444700		Chr1	28293301	28293400
	Chr1	13444900	13445000		Chr1	28293401	28293500
	Chr1	13445100	13445200		Chr1	28312501	28312600
	Chr1	13445200	13445300		Chr1	28312601	28312700
	Chr1	13445400	13445500		Chr1	28397501	28397600
	Chr1	13445500	13445600		Chr1	28398501	28398600
	Chr1	13445700	13445800		Chr1	28471001	28471100
	Chr1	13445800	13445900		Chr1	28471101	28471200
	Chr1	13445900	13446000		Chr1	28504801	28504900
	Chr1	13446000	13446100		Chr1	28526801	28526900
	Chr1	13446100	13446200		Chr1	28527301	28527400
	Chr1	13446300	13446400		Chr1	28527601	28527700
	Chr1	13446400	13446500		Chr1	28702901	28703000
	Chr1	13446500	13446600		Chr1	28703001	28703100
	Chr1	13446700	13446800		Chr1	28703101	28703200
	Chr1	13446900	13447000		Chr1	28703301	28703400
	Chr1	13447000	13447100		Chr1	28703401	28703500
	Chr1	13447200	13447300		Chr1	28703801	28703900
	Chr1	13447400	13447500		Chr1	28731801	28731900
	Chr1	13447600	13447700		Chr1	28732001	28732100
	Chr1	13447800	13447900		Chr1	28749901	28750000
	Chr1	13447900	13448000		Chr1	28750201	28750300
	Chr1	13448200	13448300		Chr1	28827401	28827500
	Chr1	13482300	13482400		Chr1	28828501	28828600
	Chr1	13483300	13483400		Chr1	28856001	28856100
	Chr1	13483400	13483500		Chr1	28891401	28891500
	Chr1	13484000	13484100		Chr1	28891501	28891600
	Chr1	13484100	13484200		Chr1	28891601	28891700
	Chr1	13484500	13484600		Chr1	28891801	28891900
	Chr1	13484600	13484700		Chr1	28912801	28912900
	Chr1	13484700	13484800		Chr1	28913501	28913600
	Chr1	13484900	13485000		Chr1	28994601	28994700
	Chr1	13485100	13485200		Chr1	29002501	29002600
	Chr1	13485500	13485600		Chr1	29078401	29078500
	Chr1	13485700	13485800		Chr1	29078501	29078600
	Chr1	13485800	13485900		Chr1	29078601	29078700
	Chr1	13486100	13486200		Chr1	29125601	29125700
	Chr1	13486200	13486300		Chr1	29125801	29125900
	Chr1	13486400	13486500		Chr1	29244101	29244200
	Chr1	13486500	13486600		Chr1	29244401	29244500
	Chr1	13486600	13486700		Chr1	29244501	29244600
	Chr1	13486700	13486800		Chr1	29263301	29263400
	Chr1	13487500	13487600		Chr1	29263401	29263500
	Chr1	13488000	13488100		Chr1	29312801	29312900
	Chr1	13488100	13488200		Chr1	29319401	29319500
	Chr1	13488200	13488300		Chr1	29320601	29320700
	Chr1	13488500	13488600		Chr1	29377001	29377100
	Chr1	13488600	13488700		Chr1	29380701	29380800
	Chr1	13488700	13488800		Chr1	29472301	29472400
	Chr1	13489000	13489100		Chr1	29474601	29474700
	Chr1	13489300	13489400		Chr1	29496601	29496700
	Chr1	13489400	13489500		Chr1	29611501	29611600
	Chr1	13489600	13489700		Chr1	29611601	29611700
	Chr1	13489800	13489900		Chr1	29611701	29611800
	Chr1	13489900	13490000		Chr1	29612001	29612100
	Chr1	13490000	13490100		Chr1	29612201	29612300
	Chr1	13490100	13490200		Chr1	29612301	29612400
	Chr1	13490900	13491000		Chr1	29769101	29769200
	Chr1	13491700	13491800		Chr1	29775001	29775100
	Chr1	13493400	13493500		Chr1	29840701	29840800
	Chr1	13493700	13493800		Chr1	2986401	2986500
	Chr1	13494300	13494400		Chr1	2986501	2986600
	Chr1	13507200	13507300		Chr1	2986801	2986900
	Chr1	13507800	13507900		Chr1	29983301	29983400
	Chr1	13508700	13508800		Chr1	29983401	29983500
	Chr1	13509000	13509100		Chr1	29984201	29984300
	Chr1	13509100	13509200		Chr1	29984301	29984400
	Chr1	13509400	13509500		Chr1	29984401	29984500
	Chr1	13509600	13509700		Chr1	29984501	29984600
	Chr1	13509700	13509800		Chr1	29984601	29984700
	Chr1	13509900	13510000		Chr1	30200201	30200300
	Chr1	13510100	13510200		Chr1	30200301	30200400
	Chr1	13510200	13510300		Chr1	3023501	3023600
	Chr1	13510500	13510600		Chr1	3023601	3023700
	Chr1	13510700	13510800		Chr1	3023901	3024000
	Chr1	13510900	13511000		Chr1	3024001	3024100
	Chr1	13511100	13511200		Chr1	3024201	3024300
	Chr1	13511200	13511300		Chr1	30255401	30255500
	Chr1	13511300	13511400		Chr1	30427501	30427600
	Chr1	13511400	13511500		Chr1	3062001	3062100
	Chr1	13511500	13511600		Chr1	3063501	3063600
	Chr1	13511800	13511900		Chr1	3073201	3073300
	Chr1	13511900	13512000		Chr1	3073401	3073500
	Chr1	13512000	13512100		Chr1	3073801	3073900
	Chr1	13512100	13512200		Chr1	3250601	3250700
	Chr1	13512200	13512300		Chr1	3251201	3251300
	Chr1	13512400	13512500		Chr1	3251301	3251400
	Chr1	13512500	13512600		Chr1	3251401	3251500
	Chr1	13512600	13512700		Chr1	3412901	3413000
	Chr1	13512700	13512800		Chr1	3413001	3413100
	Chr1	13512800	13512900		Chr1	3413201	3413300
	Chr1	13512900	13513000		Chr1	3413701	3413800
	Chr1	13513000	13513100		Chr1	3414101	3414200
	Chr1	13513100	13513200		Chr1	3497801	3497900
	Chr1	13513200	13513300		Chr1	3498901	3499000
	Chr1	13513300	13513400		Chr1	3546801	3546900
	Chr1	13513500	13513600		Chr1	3547601	3547700
	Chr1	13513700	13513800		Chr1	3547701	3547800
	Chr1	13513800	13513900		Chr1	3573101	3573200
	Chr1	13513900	13514000		Chr1	3762701	3762800
	Chr1	13514000	13514100		Chr1	3762901	3763000
	Chr1	13514400	13514500		Chr1	3771001	3771100
	Chr1	13514500	13514600		Chr1	3771701	3771800
	Chr1	13514600	13514700		Chr1	3825901	3826000
	Chr1	13514700	13514800		Chr1	3892101	3892200
	Chr1	13516100	13516200		Chr1	3892201	3892300
	Chr1	13516800	13516900		Chr1	3920101	3920200
	Chr1	13517000	13517100		Chr1	3933101	3933200
	Chr1	13517100	13517200		Chr1	3933201	3933300
	Chr1	13517200	13517300		Chr1	3933301	3933400
	Chr1	13517700	13517800		Chr1	3980001	3980100
	Chr1	13518100	13518200		Chr1	4093301	4093400
	Chr1	13518200	13518300		Chr1	4093401	4093500
	Chr1	13518500	13518600		Chr1	4093501	4093600
	Chr1	13518600	13518700		Chr1	4094301	4094400
	Chr1	13519000	13519100		Chr1	4094401	4094500
	Chr1	13519100	13519200		Chr1	4110101	4110200
	Chr1	13519200	13519300		Chr1	4110901	4111000
	Chr1	13519400	13519500		Chr1	4112101	4112200
	Chr1	13519600	13519700		Chr1	4112901	4113000
	Chr1	13519900	13520000		Chr1	4209201	4209300
	Chr1	13560300	13560400		Chr1	4209501	4209600
	Chr1	13560400	13560500		Chr1	431301	431400
	Chr1	13560500	13560600		Chr1	431401	431500
	Chr1	13560600	13560700		Chr1	431501	431600
	Chr1	13560900	13561000		Chr1	431601	431700
	Chr1	13561500	13561600		Chr1	431701	431800
	Chr1	13562000	13562100		Chr1	431901	432000
	Chr1	13562800	13562900		Chr1	4329901	4330000
	Chr1	13563800	13563900		Chr1	4334301	4334400
	Chr1	13575000	13575100		Chr1	433701	433800
	Chr1	13575500	13575600		Chr1	4405901	4406000
	Chr1	13576100	13576200		Chr1	4406001	4406100
	Chr1	13578800	13578900		Chr1	4407601	4407700
	Chr1	13592600	13592700		Chr1	4410901	4411000
	Chr1	13593100	13593200		Chr1	4411001	4411100
	Chr1	13593400	13593500		Chr1	4439901	4440000
	Chr1	13593800	13593900		Chr1	44601	44700
	Chr1	13594300	13594400		Chr1	44701	44800
	Chr1	13594600	13594700		Chr1	4525101	4525200
	Chr1	13595600	13595700		Chr1	4525201	4525300
	Chr1	13595900	13596000		Chr1	4583001	4583100
	Chr1	13596000	13596100		Chr1	4583401	4583500
	Chr1	13596400	13596500		Chr1	4658201	4658300
	Chr1	13596600	13596700		Chr1	4658301	4658400
	Chr1	13596900	13597000		Chr1	4770101	4770200
	Chr1	13597700	13597800		Chr1	4770201	4770300
	Chr1	13598100	13598200		Chr1	4770301	4770400
	Chr1	13598500	13598600		Chr1	4770501	4770600
	Chr1	13599200	13599300		Chr1	4770601	4770700
	Chr1	13605400	13605500		Chr1	4787101	4787200
	Chr1	13605900	13606000		Chr1	4787201	4787300
	Chr1	13606000	13606100		Chr1	4860401	4860500
	Chr1	13606800	13606900		Chr1	4896601	4896700
	Chr1	13608200	13608300		Chr1	4966601	4966700
	Chr1	13609000	13609100		Chr1	4966901	4967000
	Chr1	13610500	13610600		Chr1	499601	499700
	Chr1	13611100	13611200		Chr1	500001	500100
	Chr1	13611700	13611800		Chr1	5056001	5056100
	Chr1	13612800	13612900		Chr1	5056101	5056200
	Chr1	13613000	13613100		Chr1	5098301	5098400
	Chr1	13613600	13613700		Chr1	5098401	5098500
	Chr1	13613700	13613800		Chr1	5098501	5098600
	Chr1	13625800	13625900		Chr1	512701	512800
	Chr1	13626400	13626500		Chr1	513001	513100
	Chr1	13626500	13626600		Chr1	5285101	5285200
	Chr1	13626600	13626700		Chr1	5285201	5285300
	Chr1	13626700	13626800		Chr1	5285301	5285400
	Chr1	13627400	13627500		Chr1	5389601	5389700
	Chr1	13628100	13628200		Chr1	5391401	5391500
	Chr1	13631000	13631100		Chr1	5392601	5392700
	Chr1	13631900	13632000		Chr1	540401	540500
	Chr1	13632400	13632500		Chr1	540501	540600
	Chr1	13632700	13632800		Chr1	540601	540700
	Chr1	13644300	13644400		Chr1	540901	541000
	Chr1	13645000	13645100		Chr1	5436901	5437000
	Chr1	13645200	13645300		Chr1	5437001	5437100
	Chr1	13645300	13645400		Chr1	549701	549800
	Chr1	13645700	13645800		Chr1	5531301	5531400
	Chr1	13647400	13647500		Chr1	5531701	5531800
	Chr1	13648100	13648200		Chr1	55701	55800
	Chr1	13648600	13648700		Chr1	55801	55900
	Chr1	13648700	13648800		Chr1	56401	56500
	Chr1	13648800	13648900		Chr1	5657801	5657900
	Chr1	13649000	13649100		Chr1	5657901	5658000
	Chr1	13649500	13649600		Chr1	5659101	5659200
	Chr1	13649700	13649800		Chr1	5659201	5659300
	Chr1	13650000	13650100		Chr1	5681701	5681800
	Chr1	13650700	13650800		Chr1	5681801	5681900
	Chr1	13652200	13652300		Chr1	5701601	5701700
	Chr1	13652300	13652400		Chr1	5701901	5702000
	Chr1	13652400	13652500		Chr1	5798701	5798800
	Chr1	13652800	13652900		Chr1	5798801	5798900
	Chr1	13652900	13653000		Chr1	5799101	5799200
	Chr1	13653100	13653200		Chr1	5799201	5799300
	Chr1	13653400	13653500		Chr1	5799401	5799500
	Chr1	13660500	13660600		Chr1	5863001	5863100
	Chr1	13661300	13661400		Chr1	5863201	5863300
	Chr1	13661900	13662000		Chr1	5863301	5863400
	Chr1	13662200	13662300		Chr1	587501	587600
	Chr1	13662700	13662800		Chr1	587701	587800
	Chr1	13662800	13662900		Chr1	587901	588000
	Chr1	13662900	13663000		Chr1	5899201	5899300
	Chr1	13663000	13663100		Chr1	5899301	5899400
	Chr1	13663300	13663400		Chr1	5899401	5899500
	Chr1	13663700	13663800		Chr1	5899601	5899700
	Chr1	13664100	13664200		Chr1	5899701	5899800
	Chr1	13664200	13664300		Chr1	5911701	5911800
	Chr1	13664500	13664600		Chr1	5911901	5912000
	Chr1	13664700	13664800		Chr1	5958801	5958900
	Chr1	13665100	13665200		Chr1	5965501	5965600
	Chr1	13665200	13665300		Chr1	5965601	5965700
	Chr1	13665600	13665700		Chr1	5974901	5975000
	Chr1	13666200	13666300		Chr1	5975001	5975100
	Chr1	13678400	13678500		Chr1	6074901	6075000
	Chr1	13679300	13679400		Chr1	6075201	6075300
	Chr1	13679400	13679500		Chr1	6075301	6075400
	Chr1	13679800	13679900		Chr1	6075401	6075500
	Chr1	13680400	13680500		Chr1	6102701	6102800
	Chr1	13682000	13682100		Chr1	6102801	6102900
	Chr1	13682100	13682200		Chr1	6141401	6141500
	Chr1	13690300	13690400		Chr1	6156401	6156500
	Chr1	13692700	13692800		Chr1	6158701	6158800
	Chr1	13692900	13693000		Chr1	6173401	6173500
	Chr1	13693600	13693700		Chr1	6218701	6218800
	Chr1	13708600	13708700		Chr1	6218801	6218900
	Chr1	13709700	13709800		Chr1	6219001	6219100
	Chr1	13710200	13710300		Chr1	6233901	6234000
	Chr1	13710400	13710500		Chr1	6235001	6235100
	Chr1	13711900	13712000		Chr1	6236501	6236600
	Chr1	13712400	13712500		Chr1	6237601	6237700
	Chr1	13721700	13721800		Chr1	6273601	6273700
	Chr1	13735100	13735200		Chr1	634201	634300
	Chr1	13735800	13735900		Chr1	634401	634500
	Chr1	13736600	13736700		Chr1	634501	634600
	Chr1	13757800	13757900		Chr1	6404501	6404600
	Chr1	13769300	13769400		Chr1	6404801	6404900
	Chr1	13769500	13769600		Chr1	6405301	6405400
	Chr1	13769600	13769700		Chr1	6426301	6426400
	Chr1	13769800	13769900		Chr1	6454701	6454800
	Chr1	13769900	13770000		Chr1	6455801	6455900
	Chr1	13770700	13770800		Chr1	6455901	6456000
	Chr1	13771100	13771200		Chr1	6473001	6473100
	Chr1	13771400	13771500		Chr1	6473201	6473300
	Chr1	13773400	13773500		Chr1	6484701	6484800
	Chr1	13773600	13773700		Chr1	6514501	6514600
	Chr1	13773900	13774000		Chr1	6515001	6515100
	Chr1	13774100	13774200		Chr1	6515101	6515200
	Chr1	13774600	13774700		Chr1	6515201	6515300
	Chr1	13775500	13775600		Chr1	6538401	6538500
	Chr1	13775600	13775700		Chr1	6538901	6539000
	Chr1	13779900	13780000		Chr1	6539301	6539400
	Chr1	13780400	13780500		Chr1	6543401	6543500
	Chr1	13780600	13780700		Chr1	6574701	6574800
	Chr1	13780700	13780800		Chr1	6593201	6593300
	Chr1	13780800	13780900		Chr1	6593301	6593400
	Chr1	13781600	13781700		Chr1	6593401	6593500
	Chr1	13781800	13781900		Chr1	6593501	6593600
	Chr1	13782000	13782100		Chr1	6640401	6640500
	Chr1	13782200	13782300		Chr1	6640701	6640800
	Chr1	13782600	13782700		Chr1	6640801	6640900
	Chr1	13783100	13783200		Chr1	6640901	6641000
	Chr1	13783300	13783400		Chr1	6641001	6641100
	Chr1	13783700	13783800		Chr1	6704201	6704300
	Chr1	13783900	13784000		Chr1	6709201	6709300
	Chr1	13784100	13784200		Chr1	6715501	6715600
	Chr1	13784600	13784700		Chr1	6718001	6718100
	Chr1	13784800	13784900		Chr1	6720801	6720900
	Chr1	13784900	13785000		Chr1	6723001	6723100
	Chr1	13785000	13785100		Chr1	6736401	6736500
	Chr1	13785100	13785200		Chr1	6736901	6737000
	Chr1	13785400	13785500		Chr1	6737101	6737200
	Chr1	13786300	13786400		Chr1	6737301	6737400
	Chr1	13787300	13787400		Chr1	6743001	6743100
	Chr1	13787500	13787600		Chr1	6743101	6743200
	Chr1	13787900	13788000		Chr1	6744001	6744100
	Chr1	13788100	13788200		Chr1	6744101	6744200
	Chr1	13788500	13788600		Chr1	6759601	6759700
	Chr1	13788600	13788700		Chr1	6906101	6906200
	Chr1	13788800	13788900		Chr1	6906201	6906300
	Chr1	13789000	13789100		Chr1	6906401	6906500
	Chr1	13789100	13789200		Chr1	696501	696600
	Chr1	13789700	13789800		Chr1	696601	696700
	Chr1	13789900	13790000		Chr1	697301	697400
	Chr1	13790200	13790300		Chr1	7023601	7023700
	Chr1	13790600	13790700		Chr1	7024401	7024500
	Chr1	13790800	13790900		Chr1	7035901	7036000
	Chr1	13790900	13791000		Chr1	7037101	7037200
	Chr1	13791000	13791100		Chr1	7077901	7078000
	Chr1	13791100	13791200		Chr1	7132801	7132900
	Chr1	13791200	13791300		Chr1	7227901	7228000
	Chr1	13791300	13791400		Chr1	7241201	7241300
	Chr1	13791400	13791500		Chr1	7241301	7241400
	Chr1	13792200	13792300		Chr1	7241401	7241500
	Chr1	13792500	13792600		Chr1	7255001	7255100
	Chr1	13793000	13793100		Chr1	7255601	7255700
	Chr1	13794000	13794100		Chr1	7257101	7257200
	Chr1	13794600	13794700		Chr1	7281801	7281900
	Chr1	13796200	13796300		Chr1	7282101	7282200
	Chr1	13796600	13796700		Chr1	7282201	7282300
	Chr1	13797000	13797100		Chr1	7344401	7344500
	Chr1	13797500	13797600		Chr1	7364901	7365000
	Chr1	13798200	13798300		Chr1	7365701	7365800
	Chr1	13798600	13798700		Chr1	7392301	7392400
	Chr1	13798900	13799000		Chr1	7392401	7392500
	Chr1	13799400	13799500		Chr1	7393001	7393100
	Chr1	13799500	13799600		Chr1	7393201	7393300
	Chr1	13800200	13800300		Chr1	7393301	7393400
	Chr1	13800300	13800400		Chr1	7505101	7505200
	Chr1	13800600	13800700		Chr1	7541301	7541400
	Chr1	13800900	13801000		Chr1	759001	759100
	Chr1	13801000	13801100		Chr1	759101	759200
	Chr1	13801200	13801300		Chr1	7604901	7605000
	Chr1	13819500	13819600		Chr1	7717401	7717500
	Chr1	13819600	13819700		Chr1	7717701	7717800
	Chr1	13819900	13820000		Chr1	7722301	7722400
	Chr1	13820000	13820100		Chr1	7722401	7722500
	Chr1	13820100	13820200		Chr1	77301	77400
	Chr1	13820400	13820500		Chr1	7761301	7761400
	Chr1	13820700	13820800		Chr1	7761601	7761700
	Chr1	13820900	13821000		Chr1	7762001	7762100
	Chr1	13821300	13821400		Chr1	7787501	7787600
	Chr1	13821400	13821500		Chr1	7833501	7833600
	Chr1	13821500	13821600		Chr1	7833601	7833700
	Chr1	13821700	13821800		Chr1	7834001	7834100
	Chr1	13821800	13821900		Chr1	785301	785400
	Chr1	13821900	13822000		Chr1	791701	791800
	Chr1	13822100	13822200		Chr1	7936601	7936700
	Chr1	13822500	13822600		Chr1	7936701	7936800
	Chr1	13823000	13823100		Chr1	7961101	7961200
	Chr1	13823100	13823200		Chr1	7975901	7976000
	Chr1	13823200	13823300		Chr1	7986201	7986300
	Chr1	13823300	13823400		Chr1	8016401	8016500
	Chr1	13824500	13824600		Chr1	8016501	8016600
	Chr1	13825200	13825300		Chr1	8116201	8116300
	Chr1	13825600	13825700		Chr1	8169801	8169900
	Chr1	13826100	13826200		Chr1	8169901	8170000
	Chr1	13826400	13826500		Chr1	8189901	8190000
	Chr1	13826500	13826600		Chr1	8190001	8190100
	Chr1	13826700	13826800		Chr1	8190101	8190200
	Chr1	13826900	13827000		Chr1	8190201	8190300
	Chr1	13827200	13827300		Chr1	8190401	8190500
	Chr1	13827600	13827700		Chr1	8201401	8201500
	Chr1	13827700	13827800		Chr1	822201	822300
	Chr1	13827800	13827900		Chr1	822301	822400
	Chr1	13828000	13828100		Chr1	8235901	8236000
	Chr1	13828200	13828300		Chr1	8236101	8236200
	Chr1	13828300	13828400		Chr1	8236301	8236400
	Chr1	13828900	13829000		Chr1	8238601	8238700
	Chr1	13829000	13829100		Chr1	8238701	8238800
	Chr1	13829200	13829300		Chr1	8254801	8254900
	Chr1	13829300	13829400		Chr1	8254901	8255000
	Chr1	13829400	13829500		Chr1	8267301	8267400
	Chr1	13829500	13829600		Chr1	8267401	8267500
	Chr1	13830300	13830400		Chr1	8272601	8272700
	Chr1	13830400	13830500		Chr1	8272901	8273000
	Chr1	13830600	13830700		Chr1	8276601	8276700
	Chr1	13831100	13831200		Chr1	8277401	8277500
	Chr1	13831800	13831900		Chr1	8277601	8277700
	Chr1	13833200	13833300		Chr1	8289601	8289700
	Chr1	13833700	13833800		Chr1	8289801	8289900
	Chr1	13834000	13834100		Chr1	8319701	8319800
	Chr1	13834300	13834400		Chr1	8374901	8375000
	Chr1	13834900	13835000		Chr1	8453401	8453500
	Chr1	13835700	13835800		Chr1	8453501	8453600
	Chr1	13843200	13843300		Chr1	8473401	8473500
	Chr1	13843800	13843900		Chr1	8488401	8488500
	Chr1	13844200	13844300		Chr1	8488501	8488600
	Chr1	13844700	13844800		Chr1	8495201	8495300
	Chr1	13844900	13845000		Chr1	8538701	8538800
	Chr1	13845400	13845500		Chr1	8538801	8538900
	Chr1	13863100	13863200		Chr1	8543901	8544000
	Chr1	13863400	13863500		Chr1	8622901	8623000
	Chr1	13863500	13863600		Chr1	8656101	8656200
	Chr1	13863700	13863800		Chr1	8681901	8682000
	Chr1	13863800	13863900		Chr1	8682001	8682100
	Chr1	13884300	13884400		Chr1	8767101	8767200
	Chr1	13885400	13885500		Chr1	8767201	8767300
	Chr1	13885600	13885700		Chr1	8790001	8790100
	Chr1	13885700	13885800		Chr1	8790101	8790200
	Chr1	13886100	13886200		Chr1	8798101	8798200
	Chr1	13886200	13886300		Chr1	8812501	8812600
	Chr1	13886300	13886400		Chr1	8818401	8818500
	Chr1	13886700	13886800		Chr1	8818501	8818600
	Chr1	13887100	13887200		Chr1	8827001	8827100
	Chr1	13887500	13887600		Chr1	8832901	8833000
	Chr1	13888100	13888200		Chr1	8869601	8869700
	Chr1	13889100	13889200		Chr1	8869701	8869800
	Chr1	13889600	13889700		Chr1	8869801	8869900
	Chr1	13912800	13912900		Chr1	8870501	8870600
	Chr1	13914500	13914600		Chr1	8870601	8870700
	Chr1	13916600	13916700		Chr1	889201	889300
	Chr1	13917500	13917600		Chr1	889401	889500
	Chr1	13917900	13918000		Chr1	8927601	8927700
	Chr1	13918300	13918400		Chr1	9004801	9004900
	Chr1	13918400	13918500		Chr1	9062401	9062500
	Chr1	13919000	13919100		Chr1	9082801	9082900
	Chr1	13920700	13920800		Chr1	9136601	9136700
	Chr1	13920800	13920900		Chr1	9138201	9138300
	Chr1	13920900	13921000		Chr1	9174401	9174500
	Chr1	13921000	13921100		Chr1	9174501	9174600
	Chr1	13922000	13922100		Chr1	9175301	9175400
	Chr1	13922200	13922300		Chr1	9177501	9177600
	Chr1	13922500	13922600		Chr1	9177701	9177800
	Chr1	13922600	13922700		Chr1	9188501	9188600
	Chr1	13923200	13923300		Chr1	9204001	9204100
	Chr1	13923700	13923800		Chr1	9236001	9236100
	Chr1	13923900	13924000		Chr1	9237001	9237100
	Chr1	13924000	13924100		Chr1	9304801	9304900
	Chr1	13930500	13930600		Chr1	9357801	9357900
	Chr1	13931100	13931200		Chr1	9373401	9373500
	Chr1	13931200	13931300		Chr1	9373601	9373700
	Chr1	13931300	13931400		Chr1	9384101	9384200
	Chr1	13931400	13931500		Chr1	9412401	9412500
	Chr1	13936200	13936300		Chr1	9418101	9418200
	Chr1	13936600	13936700		Chr1	9418201	9418300
	Chr1	13936900	13937000		Chr1	944301	944400
	Chr1	13937100	13937200		Chr1	9626801	9626900
	Chr1	13937300	13937400		Chr1	9626901	9627000
	Chr1	13937400	13937500		Chr1	9676501	9676600
	Chr1	13937500	13937600		Chr1	9691201	9691300
	Chr1	13937900	13938000		Chr1	9706401	9706500
	Chr1	13938600	13938700		Chr1	9746401	9746500
	Chr1	13941200	13941300		Chr1	9754401	9754500
	Chr1	13941500	13941600		Chr1	9754501	9754600
	Chr1	13942600	13942700		Chr1	9754801	9754900
	Chr1	13942700	13942800		Chr1	9755101	9755200
	Chr1	13943200	13943300		Chr1	9755401	9755500
	Chr1	13943300	13943400		Chr1	9755701	9755800
	Chr1	13943400	13943500		Chr1	9756001	9756100
	Chr1	13943500	13943600		Chr1	9756401	9756500
	Chr1	13943600	13943700		Chr1	9762601	9762700
	Chr1	13943700	13943800		Chr1	9778401	9778500
	Chr1	13943800	13943900		Chr1	9811801	9811900
	Chr1	13944000	13944100		Chr1	9811901	9812000
	Chr1	13944200	13944300		Chr1	9812101	9812200
	Chr1	13944600	13944700		Chr1	9818101	9818200
	Chr1	13944900	13945000		Chr1	9836501	9836600
	Chr1	13945100	13945200		Chr1	9837501	9837600
	Chr1	13945300	13945400		Chr1	9852801	9852900
	Chr1	13945500	13945600		Chr1	9862701	9862800
	Chr1	13945700	13945800		Chr1	9865401	9865500
	Chr1	13945800	13945900		Chr1	9867301	9867400
	Chr1	13946200	13946300		Chr1	9884001	9884100
	Chr1	13946300	13946400		Chr1	9915401	9915500
	Chr1	13946400	13946500		Chr1	9915501	9915600
	Chr1	13946600	13946700		Chr1	9916301	9916400
	Chr1	13947100	13947200		Chr1	9916401	9916500
	Chr1	13947200	13947300		Chr1	9918501	9918600
	Chr1	13950600	13950700		Chr1	9919201	9919300
	Chr1	13950700	13950800		Chr1	9919301	9919400
	Chr1	13952300	13952400		Chr1	9926001	9926100
	Chr1	13952700	13952800		Chr1	9939401	9939500
	Chr1	13953200	13953300		Chr1	9939501	9939600
	Chr1	13954300	13954400		Chr2	10001701	10001800
	Chr1	13955700	13955800		Chr2	10009301	10009400
	Chr1	13955800	13955900		Chr2	10009501	10009600
	Chr1	13955900	13956000		Chr2	10009601	10009700
	Chr1	13956400	13956500		Chr2	10070101	10070200
	Chr1	13956500	13956600		Chr2	10070201	10070300
	Chr1	13956900	13957000		Chr2	10070301	10070400
	Chr1	13957100	13957200		Chr2	10070901	10071000
	Chr1	13957300	13957400		Chr2	10093501	10093600
	Chr1	13957400	13957500		Chr2	1012801	1012900
	Chr1	13957500	13957600		Chr2	1017601	1017700
	Chr1	13957900	13958000		Chr2	10194701	10194800
	Chr1	13958300	13958400		Chr2	10194901	10195000
	Chr1	13958400	13958500		Chr2	10239001	10239100
	Chr1	13958500	13958600		Chr2	10239101	10239200
	Chr1	13958700	13958800		Chr2	10239401	10239500
	Chr1	13959000	13959100		Chr2	10255501	10255600
	Chr1	13959100	13959200		Chr2	10255701	10255800
	Chr1	13961600	13961700		Chr2	10255901	10256000
	Chr1	13969700	13969800		Chr2	10289901	10290000
	Chr1	13970400	13970500		Chr2	10306101	10306200
	Chr1	13971700	13971800		Chr2	10317801	10317900
	Chr1	13971900	13972000		Chr2	10317901	10318000
	Chr1	13973800	13973900		Chr2	10351601	10351700
	Chr1	13974000	13974100		Chr2	1037801	1037900
	Chr1	13975600	13975700		Chr2	1038101	1038200
	Chr1	13978100	13978200		Chr2	1038201	1038300
	Chr1	13978300	13978400		Chr2	1038301	1038400
	Chr1	14019500	14019600		Chr2	1038801	1038900
	Chr1	14019800	14019900		Chr2	10435101	10435200
	Chr1	14019900	14020000		Chr2	10436301	10436400
	Chr1	14020000	14020100		Chr2	10437201	10437300
	Chr1	14020200	14020300		Chr2	10467601	10467700
	Chr1	14020500	14020600		Chr2	10469001	10469100
	Chr1	14020600	14020700		Chr2	1048301	1048400
	Chr1	14021000	14021100		Chr2	1049101	1049200
	Chr1	14022000	14022100		Chr2	1049301	1049400
	Chr1	14022100	14022200		Chr2	1050201	1050300
	Chr1	14022400	14022500		Chr2	10558201	10558300
	Chr1	14022800	14022900		Chr2	10562001	10562100
	Chr1	14023600	14023700		Chr2	10588801	10588900
	Chr1	14023800	14023900		Chr2	10590601	10590700
	Chr1	14044600	14044700		Chr2	10608801	10608900
	Chr1	14045100	14045200		Chr2	10621701	10621800
	Chr1	14050000	14050100		Chr2	1065601	1065700
	Chr1	14075000	14075100		Chr2	1065701	1065800
	Chr1	14078800	14078900		Chr2	10678201	10678300
	Chr1	14078900	14079000		Chr2	10678301	10678400
	Chr1	14080600	14080700		Chr2	10682301	10682400
	Chr1	14081900	14082000		Chr2	10683701	10683800
	Chr1	14083700	14083800		Chr2	1078801	1078900
	Chr1	14084300	14084400		Chr2	1078901	1079000
	Chr1	14084600	14084700		Chr2	10797201	10797300
	Chr1	14084700	14084800		Chr2	10842001	10842100
	Chr1	14084800	14084900		Chr2	10842101	10842200
	Chr1	14084900	14085000		Chr2	1085201	1085300
	Chr1	14085500	14085600		Chr2	1085301	1085400
	Chr1	14086100	14086200		Chr2	10880101	10880200
	Chr1	14087200	14087300		Chr2	10931601	10931700
	Chr1	14087400	14087500		Chr2	10932201	10932300
	Chr1	14087600	14087700		Chr2	10973201	10973300
	Chr1	14087700	14087800		Chr2	10973301	10973400
	Chr1	14087900	14088000		Chr2	10973601	10973700
	Chr1	14088000	14088100		Chr2	10996301	10996400
	Chr1	14088600	14088700		Chr2	10996401	10996500
	Chr1	14089600	14089700		Chr2	10996601	10996700
	Chr1	14090200	14090300		Chr2	10996901	10997000
	Chr1	14092200	14092300		Chr2	11043301	11043400
	Chr1	14096300	14096400		Chr2	11043401	11043500
	Chr1	14097800	14097900		Chr2	11053401	11053500
	Chr1	14098300	14098400		Chr2	11058301	11058400
	Chr1	14099400	14099500		Chr2	11066401	11066500
	Chr1	14099500	14099600		Chr2	11075901	11076000
	Chr1	14099600	14099700		Chr2	11076101	11076200
	Chr1	14099800	14099900		Chr2	1111801	1111900
	Chr1	14103100	14103200		Chr2	11128801	11128900
	Chr1	14103700	14103800		Chr2	11161001	11161100
	Chr1	14105200	14105300		Chr2	11161101	11161200
	Chr1	14105600	14105700		Chr2	11163901	11164000
	Chr1	14105900	14106000		Chr2	11164001	11164100
	Chr1	14106000	14106100		Chr2	11177101	11177200
	Chr1	14106300	14106400		Chr2	11177201	11177300
	Chr1	14106400	14106500		Chr2	1123801	1123900
	Chr1	14106700	14106800		Chr2	1123901	1124000
	Chr1	14106900	14107000		Chr2	1126401	1126500
	Chr1	14111300	14111400		Chr2	11266001	11266100
	Chr1	14115200	14115300		Chr2	11266101	11266200
	Chr1	14116300	14116400		Chr2	11267001	11267100
	Chr1	14116400	14116500		Chr2	11267201	11267300
	Chr1	14116800	14116900		Chr2	1126901	1127000
	Chr1	14117100	14117200		Chr2	11285101	11285200
	Chr1	14121000	14121100		Chr2	11285201	11285300
	Chr1	14121600	14121700		Chr2	11285701	11285800
	Chr1	14121800	14121900		Chr2	11286601	11286700
	Chr1	14121900	14122000		Chr2	11298401	11298500
	Chr1	14122000	14122100		Chr2	11308701	11308800
	Chr1	14122200	14122300		Chr2	1134101	1134200
	Chr1	14122300	14122400		Chr2	1134201	1134300
	Chr1	14124600	14124700		Chr2	11360101	11360200
	Chr1	14125200	14125300		Chr2	11429101	11429200
	Chr1	14125300	14125400		Chr2	11508301	11508400
	Chr1	14125600	14125700		Chr2	11544601	11544700
	Chr1	14125900	14126000		Chr2	11555401	11555500
	Chr1	14126000	14126100		Chr2	11555601	11555700
	Chr1	14126600	14126700		Chr2	11556201	11556300
	Chr1	14127100	14127200		Chr2	11597301	11597400
	Chr1	14127800	14127900		Chr2	11597401	11597500
	Chr1	14128300	14128400		Chr2	11597601	11597700
	Chr1	14129400	14129500		Chr2	1160301	1160400
	Chr1	14129900	14130000		Chr2	11619301	11619400
	Chr1	14130500	14130600		Chr2	11619601	11619700
	Chr1	14131600	14131700		Chr2	11623701	11623800
	Chr1	14131900	14132000		Chr2	11623801	11623900
	Chr1	14132000	14132100		Chr2	11643201	11643300
	Chr1	14132600	14132700		Chr2	11721801	11721900
	Chr1	14133500	14133600		Chr2	11721901	11722000
	Chr1	14133600	14133700		Chr2	11739901	11740000
	Chr1	14134400	14134500		Chr2	11786701	11786800
	Chr1	14134600	14134700		Chr2	11787101	11787200
	Chr1	14178500	14178600		Chr2	11867201	11867300
	Chr1	14178600	14178700		Chr2	11909001	11909100
	Chr1	14178800	14178900		Chr2	11920501	11920600
	Chr1	14179100	14179200		Chr2	11920701	11920800
	Chr1	14179700	14179800		Chr2	11953101	11953200
	Chr1	14180900	14181000		Chr2	11983501	11983600
	Chr1	14181100	14181200		Chr2	11983801	11983900
	Chr1	14182200	14182300		Chr2	12076001	12076100
	Chr1	14184500	14184600		Chr2	12076101	12076200
	Chr1	14188700	14188800		Chr2	12093001	12093100
	Chr1	14188900	14189000		Chr2	12093901	12094000
	Chr1	14189300	14189400		Chr2	12143701	12143800
	Chr1	14189500	14189600		Chr2	12144301	12144400
	Chr1	14189700	14189800		Chr2	12174101	12174200
	Chr1	14192600	14192700		Chr2	12181401	12181500
	Chr1	14192700	14192800		Chr2	122101	122200
	Chr1	14192900	14193000		Chr2	122201	122300
	Chr1	14193000	14193100		Chr2	12243001	12243100
	Chr1	14193200	14193300		Chr2	12309901	12310000
	Chr1	14194400	14194500		Chr2	12320501	12320600
	Chr1	14197500	14197600		Chr2	12372701	12372800
	Chr1	14197600	14197700		Chr2	12393201	12393300
	Chr1	14197700	14197800		Chr2	12398201	12398300
	Chr1	14198500	14198600		Chr2	12398301	12398400
	Chr1	14199500	14199600		Chr2	12413701	12413800
	Chr1	14204300	14204400		Chr2	12554001	12554100
	Chr1	14205300	14205400		Chr2	12555301	12555400
	Chr1	14205500	14205600		Chr2	1263801	1263900
	Chr1	14206400	14206500		Chr2	1272001	1272100
	Chr1	14206600	14206700		Chr2	1272101	1272200
	Chr1	14207000	14207100		Chr2	12725401	12725500
	Chr1	14207100	14207200		Chr2	12725501	12725600
	Chr1	14209900	14210000		Chr2	12740101	12740200
	Chr1	14210100	14210200		Chr2	127801	127900
	Chr1	14210200	14210300		Chr2	12811701	12811800
	Chr1	14210600	14210700		Chr2	12812001	12812100
	Chr1	14211400	14211500		Chr2	12812601	12812700
	Chr1	14212100	14212200		Chr2	12813001	12813100
	Chr1	14214800	14214900		Chr2	12893001	12893100
	Chr1	14215500	14215600		Chr2	13032501	13032600
	Chr1	14215600	14215700		Chr2	13068301	13068400
	Chr1	14217600	14217700		Chr2	13101801	13101900
	Chr1	14218000	14218100		Chr2	13211301	13211400
	Chr1	14219100	14219200		Chr2	13211401	13211500
	Chr1	14219300	14219400		Chr2	13223101	13223200
	Chr1	14220600	14220700		Chr2	13227701	13227800
	Chr1	14220700	14220800		Chr2	13227801	13227900
	Chr1	14221000	14221100		Chr2	13268201	13268300
	Chr1	14221800	14221900		Chr2	1333001	1333100
	Chr1	14222100	14222200		Chr2	13338001	13338100
	Chr1	14224000	14224100		Chr2	13374501	13374600
	Chr1	14224100	14224200		Chr2	13375201	13375300
	Chr1	14224200	14224300		Chr2	13404401	13404500
	Chr1	14224500	14224600		Chr2	13433001	13433100
	Chr1	14224700	14224800		Chr2	13433201	13433300
	Chr1	14224900	14225000		Chr2	13433301	13433400
	Chr1	14225100	14225200		Chr2	1362501	1362600
	Chr1	14225600	14225700		Chr2	13634201	13634300
	Chr1	14225700	14225800		Chr2	13660801	13660900
	Chr1	14227200	14227300		Chr2	13660901	13661000
	Chr1	14227700	14227800		Chr2	13661201	13661300
	Chr1	14227800	14227900		Chr2	13790501	13790600
	Chr1	14228000	14228100		Chr2	13793601	13793700
	Chr1	14228300	14228400		Chr2	13793701	13793800
	Chr1	14229100	14229200		Chr2	13793801	13793900
	Chr1	14229200	14229300		Chr2	13794401	13794500
	Chr1	14229900	14230000		Chr2	1380601	1380700
	Chr1	14230100	14230200		Chr2	1380701	1380800
	Chr1	14230200	14230300		Chr2	13807901	13808000
	Chr1	14230300	14230400		Chr2	13808001	13808100
	Chr1	14230400	14230500		Chr2	1381201	1381300
	Chr1	14230500	14230600		Chr2	1383501	1383600
	Chr1	14230600	14230700		Chr2	1383601	1383700
	Chr1	14230900	14231000		Chr2	1383701	1383800
	Chr1	14231500	14231600		Chr2	1384301	1384400
	Chr1	14232000	14232100		Chr2	13866201	13866300
	Chr1	14232100	14232200		Chr2	13885901	13886000
	Chr1	14232300	14232400		Chr2	13886201	13886300
	Chr1	14232500	14232600		Chr2	13886401	13886500
	Chr1	14232600	14232700		Chr2	138901	139000
	Chr1	14232700	14232800		Chr2	13907301	13907400
	Chr1	14233800	14233900		Chr2	13907701	13907800
	Chr1	14234000	14234100		Chr2	1393701	1393800
	Chr1	14234300	14234400		Chr2	1393801	1393900
	Chr1	14234600	14234700		Chr2	1399401	1399500
	Chr1	14235000	14235100		Chr2	14290601	14290700
	Chr1	14235300	14235400		Chr2	14290701	14290800
	Chr1	14235400	14235500		Chr2	14311501	14311600
	Chr1	14235500	14235600		Chr2	14311601	14311700
	Chr1	14236300	14236400		Chr2	14363701	14363800
	Chr1	14236500	14236600		Chr2	14363801	14363900
	Chr1	14236600	14236700		Chr2	14363901	14364000
	Chr1	14236700	14236800		Chr2	14392801	14392900
	Chr1	14236900	14237000		Chr2	14392901	14393000
	Chr1	14237000	14237100		Chr2	14393001	14393100
	Chr1	14237100	14237200		Chr2	14402201	14402300
	Chr1	14237700	14237800		Chr2	14402301	14402400
	Chr1	14238800	14238900		Chr2	14403401	14403500
	Chr1	14238900	14239000		Chr2	14405801	14405900
	Chr1	14239800	14239900		Chr2	14408001	14408100
	Chr1	14240400	14240500		Chr2	14415301	14415400
	Chr1	14241600	14241700		Chr2	14415401	14415500
	Chr1	14241700	14241800		Chr2	14417001	14417100
	Chr1	14242200	14242300		Chr2	14417101	14417200
	Chr1	14242900	14243000		Chr2	14457301	14457400
	Chr1	14243000	14243100		Chr2	14457401	14457500
	Chr1	14243400	14243500		Chr2	14457501	14457600
	Chr1	14243600	14243700		Chr2	14458201	14458300
	Chr1	14243800	14243900		Chr2	14553701	14553800
	Chr1	14243900	14244000		Chr2	14553901	14554000
	Chr1	14244100	14244200		Chr2	14554901	14555000
	Chr1	14244200	14244300		Chr2	14572501	14572600
	Chr1	14244400	14244500		Chr2	14572701	14572800
	Chr1	14244600	14244700		Chr2	14597401	14597500
	Chr1	14245100	14245200		Chr2	1461301	1461400
	Chr1	14245300	14245400		Chr2	1465601	1465700
	Chr1	14245700	14245800		Chr2	1465701	1465800
	Chr1	14246500	14246600		Chr2	14675801	14675900
	Chr1	14247100	14247200		Chr2	14676201	14676300
	Chr1	14247200	14247300		Chr2	14676301	14676400
	Chr1	14247500	14247600		Chr2	14682601	14682700
	Chr1	14247700	14247800		Chr2	14683401	14683500
	Chr1	14247900	14248000		Chr2	14683501	14683600
	Chr1	14248000	14248100		Chr2	14810801	14810900
	Chr1	14249400	14249500		Chr2	14811801	14811900
	Chr1	14249800	14249900		Chr2	14812801	14812900
	Chr1	14250200	14250300		Chr2	14846601	14846700
	Chr1	14250600	14250700		Chr2	14860801	14860900
	Chr1	14250900	14251000		Chr2	14951801	14951900
	Chr1	14251100	14251200		Chr2	14952001	14952100
	Chr1	14251300	14251400		Chr2	14952701	14952800
	Chr1	14251600	14251700		Chr2	1505401	1505500
	Chr1	14251700	14251800		Chr2	15097801	15097900
	Chr1	14253000	14253100		Chr2	15097901	15098000
	Chr1	14253300	14253400		Chr2	15110101	15110200
	Chr1	14253800	14253900		Chr2	1513201	1513300
	Chr1	14254600	14254700		Chr2	1513301	1513400
	Chr1	14254700	14254800		Chr2	15134201	15134300
	Chr1	14255400	14255500		Chr2	15134501	15134600
	Chr1	14256100	14256200		Chr2	15134701	15134800
	Chr1	14256400	14256500		Chr2	15140401	15140500
	Chr1	14256600	14256700		Chr2	15190501	15190600
	Chr1	14257600	14257700		Chr2	1522901	1523000
	Chr1	14258200	14258300		Chr2	15371101	15371200
	Chr1	14258400	14258500		Chr2	15402101	15402200
	Chr1	14258800	14258900		Chr2	15402201	15402300
	Chr1	14259800	14259900		Chr2	15448901	15449000
	Chr1	14260700	14260800		Chr2	15449001	15449100
	Chr1	14260800	14260900		Chr2	15566801	15566900
	Chr1	14261100	14261200		Chr2	15566901	15567000
	Chr1	14261600	14261700		Chr2	15567601	15567700
	Chr1	14261700	14261800		Chr2	15567801	15567900
	Chr1	14261900	14262000		Chr2	15567901	15568000
	Chr1	14262100	14262200		Chr2	1572501	1572600
	Chr1	14262500	14262600		Chr2	1572601	1572700
	Chr1	14264400	14264500		Chr2	15821401	15821500
	Chr1	14265500	14265600		Chr2	15821501	15821600
	Chr1	14265700	14265800		Chr2	15821601	15821700
	Chr1	14266600	14266700		Chr2	1585501	1585600
	Chr1	14267500	14267600		Chr2	1586201	1586300
	Chr1	14267700	14267800		Chr2	1587501	1587600
	Chr1	14269000	14269100		Chr2	1597401	1597500
	Chr1	14269400	14269500		Chr2	16006501	16006600
	Chr1	14269900	14270000		Chr2	16007801	16007900
	Chr1	14270300	14270400		Chr2	16020901	16021000
	Chr1	14270500	14270600		Chr2	16150701	16150800
	Chr1	14271600	14271700		Chr2	16150801	16150900
	Chr1	14272400	14272500		Chr2	16150901	16151000
	Chr1	14273200	14273300		Chr2	16273101	16273200
	Chr1	14273500	14273600		Chr2	16279601	16279700
	Chr1	14274800	14274900		Chr2	16280701	16280800
	Chr1	14275400	14275500		Chr2	1630601	1630700
	Chr1	14279900	14280000		Chr2	1630701	1630800
	Chr1	14280900	14281000		Chr2	163301	163400
	Chr1	14281100	14281200		Chr2	16347901	16348000
	Chr1	14311700	14311800		Chr2	163401	163500
	Chr1	14314000	14314100		Chr2	1637301	1637400
	Chr1	14314400	14314500		Chr2	16379601	16379700
	Chr1	14314800	14314900		Chr2	16380701	16380800
	Chr1	14314900	14315000		Chr2	16380801	16380900
	Chr1	14315100	14315200		Chr2	1642301	1642400
	Chr1	14315800	14315900		Chr2	16467101	16467200
	Chr1	14316100	14316200		Chr2	16537601	16537700
	Chr1	14316300	14316400		Chr2	16537701	16537800
	Chr1	14316500	14316600		Chr2	16537801	16537900
	Chr1	14316700	14316800		Chr2	16556001	16556100
	Chr1	14317400	14317500		Chr2	16556101	16556200
	Chr1	14317500	14317600		Chr2	16556201	16556300
	Chr1	14318000	14318100		Chr2	16560501	16560600
	Chr1	14318500	14318600		Chr2	16560701	16560800
	Chr1	14318600	14318700		Chr2	16575101	16575200
	Chr1	14318900	14319000		Chr2	16596201	16596300
	Chr1	14319300	14319400		Chr2	16596301	16596400
	Chr1	14319400	14319500		Chr2	16596401	16596500
	Chr1	14320700	14320800		Chr2	16603701	16603800
	Chr1	14322100	14322200		Chr2	16625701	16625800
	Chr1	14322200	14322300		Chr2	16625801	16625900
	Chr1	14322700	14322800		Chr2	16625901	16626000
	Chr1	14323000	14323100		Chr2	16626601	16626700
	Chr1	14324700	14324800		Chr2	16665001	16665100
	Chr1	14325000	14325100		Chr2	1670001	1670100
	Chr1	14326000	14326100		Chr2	1670201	1670300
	Chr1	14326100	14326200		Chr2	1676401	1676500
	Chr1	14326200	14326300		Chr2	1678701	1678800
	Chr1	14327800	14327900		Chr2	16798601	16798700
	Chr1	14328100	14328200		Chr2	16798801	16798900
	Chr1	14328400	14328500		Chr2	1684901	1685000
	Chr1	14329700	14329800		Chr2	16876101	16876200
	Chr1	14334400	14334500		Chr2	16876201	16876300
	Chr1	14336500	14336600		Chr2	16876801	16876900
	Chr1	14336600	14336700		Chr2	16876901	16877000
	Chr1	14337300	14337400		Chr2	16877001	16877100
	Chr1	14337400	14337500		Chr2	16877101	16877200
	Chr1	14337900	14338000		Chr2	1691101	1691200
	Chr1	14338200	14338300		Chr2	1691201	1691300
	Chr1	14338700	14338800		Chr2	16920901	16921000
	Chr1	14340300	14340400		Chr2	16921601	16921700
	Chr1	14340700	14340800		Chr2	16952701	16952800
	Chr1	14342300	14342400		Chr2	1695901	1696000
	Chr1	14342400	14342500		Chr2	1701801	1701900
	Chr1	14342900	14343000		Chr2	17147201	17147300
	Chr1	14343200	14343300		Chr2	17147301	17147400
	Chr1	14343600	14343700		Chr2	1715801	1715900
	Chr1	14343900	14344000		Chr2	1716001	1716100
	Chr1	14345400	14345500		Chr2	17205901	17206000
	Chr1	14348500	14348600		Chr2	17253101	17253200
	Chr1	14350400	14350500		Chr2	17253201	17253300
	Chr1	14351100	14351200		Chr2	17253801	17253900
	Chr1	14351400	14351500		Chr2	17255801	17255900
	Chr1	14351600	14351700		Chr2	17255901	17256000
	Chr1	14351700	14351800		Chr2	17256601	17256700
	Chr1	14351900	14352000		Chr2	17256701	17256800
	Chr1	14352400	14352500		Chr2	17275001	17275100
	Chr1	14352900	14353000		Chr2	17299401	17299500
	Chr1	14355300	14355400		Chr2	17300301	17300400
	Chr1	14355800	14355900		Chr2	17307601	17307700
	Chr1	14358000	14358100		Chr2	17307701	17307800
	Chr1	14358500	14358600		Chr2	1731501	1731600
	Chr1	14358900	14359000		Chr2	1731701	1731800
	Chr1	14359100	14359200		Chr2	17363501	17363600
	Chr1	14359700	14359800		Chr2	17363701	17363800
	Chr1	14359800	14359900		Chr2	1740701	1740800
	Chr1	14361000	14361100		Chr2	1740801	1740900
	Chr1	14361100	14361200		Chr2	1740901	1741000
	Chr1	14361600	14361700		Chr2	17487201	17487300
	Chr1	14361700	14361800		Chr2	17488501	17488600
	Chr1	14361800	14361900		Chr2	17488901	17489000
	Chr1	14362200	14362300		Chr2	17545701	17545800
	Chr1	14363000	14363100		Chr2	17545801	17545900
	Chr1	14364000	14364100		Chr2	17545901	17546000
	Chr1	14365300	14365400		Chr2	17546701	17546800
	Chr1	14365400	14365500		Chr2	1776401	1776500
	Chr1	14365600	14365700		Chr2	178501	178600
	Chr1	14365900	14366000		Chr2	17904301	17904400
	Chr1	14366100	14366200		Chr2	1792401	1792500
	Chr1	14366200	14366300		Chr2	1793701	1793800
	Chr1	14366300	14366400		Chr2	179701	179800
	Chr1	14367600	14367700		Chr2	179801	179900
	Chr1	14368900	14369000		Chr2	17992501	17992600
	Chr1	14369100	14369200		Chr2	17992601	17992700
	Chr1	14369300	14369400		Chr2	17992701	17992800
	Chr1	14369500	14369600		Chr2	17993001	17993100
	Chr1	14369800	14369900		Chr2	17993101	17993200
	Chr1	14370400	14370500		Chr2	179901	180000
	Chr1	14371100	14371200		Chr2	18092101	18092200
	Chr1	14371500	14371600		Chr2	18093101	18093200
	Chr1	14371600	14371700		Chr2	18106701	18106800
	Chr1	14371800	14371900		Chr2	18165901	18166000
	Chr1	14373700	14373800		Chr2	1821401	1821500
	Chr1	14374200	14374300		Chr2	1821601	1821700
	Chr1	14374400	14374500		Chr2	1822601	1822700
	Chr1	14375100	14375200		Chr2	1824701	1824800
	Chr1	14375800	14375900		Chr2	18289101	18289200
	Chr1	14375900	14376000		Chr2	18387901	18388000
	Chr1	14376000	14376100		Chr2	1839201	1839300
	Chr1	14376700	14376800		Chr2	18393401	18393500
	Chr1	14377200	14377300		Chr2	18396001	18396100
	Chr1	14380300	14380400		Chr2	184001	184100
	Chr1	14380600	14380700		Chr2	184201	184300
	Chr1	14380800	14380900		Chr2	18498501	18498600
	Chr1	14380900	14381000		Chr2	18660201	18660300
	Chr1	14381000	14381100		Chr2	1869001	1869100
	Chr1	14381500	14381600		Chr2	18702501	18702600
	Chr1	14382000	14382100		Chr2	187401	187500
	Chr1	14383400	14383500		Chr2	18797701	18797800
	Chr1	14384000	14384100		Chr2	18803601	18803700
	Chr1	14384200	14384300		Chr2	18890301	18890400
	Chr1	14384400	14384500		Chr2	18891201	18891300
	Chr1	14385000	14385100		Chr2	1889901	1890000
	Chr1	14385700	14385800		Chr2	1890101	1890200
	Chr1	14386000	14386100		Chr2	1890201	1890300
	Chr1	14386100	14386200		Chr2	18957801	18957900
	Chr1	14386300	14386400		Chr2	1899201	1899300
	Chr1	14387500	14387600		Chr2	1902801	1902900
	Chr1	14387700	14387800		Chr2	1902901	1903000
	Chr1	14388100	14388200		Chr2	1912801	1912900
	Chr1	14389400	14389500		Chr2	19163201	19163300
	Chr1	14398000	14398100		Chr2	19172201	19172300
	Chr1	14398200	14398300		Chr2	19172301	19172400
	Chr1	14398600	14398700		Chr2	19172401	19172500
	Chr1	14402300	14402400		Chr2	19172501	19172600
	Chr1	14403600	14403700		Chr2	19195401	19195500
	Chr1	14404700	14404800		Chr2	19195501	19195600
	Chr1	14405900	14406000		Chr2	19195701	19195800
	Chr1	14406700	14406800		Chr2	19196701	19196800
	Chr1	14406800	14406900		Chr2	19220401	19220500
	Chr1	14408100	14408200		Chr2	19220501	19220600
	Chr1	14409200	14409300		Chr2	19242701	19242800
	Chr1	14409300	14409400		Chr2	19242801	19242900
	Chr1	14409800	14409900		Chr2	19243001	19243100
	Chr1	14411200	14411300		Chr2	19243101	19243200
	Chr1	14411300	14411400		Chr2	19268601	19268700
	Chr1	14411400	14411500		Chr2	19269101	19269200
	Chr1	14419100	14419200		Chr2	19323501	19323600
	Chr1	14419800	14419900		Chr2	19323601	19323700
	Chr1	1442000	1442100		Chr2	19323701	19323800
	Chr1	14421500	14421600		Chr2	1937701	1937800
	Chr1	1442100	1442200		Chr2	19413901	19414000
	Chr1	14422400	14422500		Chr2	1943001	1943100
	Chr1	14422800	14422900		Chr2	1943101	1943200
	Chr1	14425500	14425600		Chr2	19433301	19433400
	Chr1	1442500	1442600		Chr2	19527901	19528000
	Chr1	14426100	14426200		Chr2	19528001	19528100
	Chr1	14426300	14426400		Chr2	19528801	19528900
	Chr1	14427100	14427200		Chr2	19623101	19623200
	Chr1	1442700	1442800		Chr2	19623301	19623400
	Chr1	1442800	1442900		Chr2	19623601	19623700
	Chr1	14429000	14429100		Chr2	19683601	19683700
	Chr1	14429400	14429500		Chr2	1988701	1988800
	Chr1	14429500	14429600		Chr2	1990501	1990600
	Chr1	14429600	14429700		Chr2	2034201	2034300
	Chr1	14429800	14429900		Chr2	2035001	2035100
	Chr1	1442900	1443000		Chr2	205201	205300
	Chr1	14429900	14430000		Chr2	2059201	2059300
	Chr1	14430100	14430200		Chr2	2082201	2082300
	Chr1	14430800	14430900		Chr2	2086401	2086500
	Chr1	1443000	1443100		Chr2	2087001	2087100
	Chr1	14431000	14431100		Chr2	2140901	2141000
	Chr1	14431100	14431200		Chr2	2150201	2150300
	Chr1	14431500	14431600		Chr2	216401	216500
	Chr1	14431600	14431700		Chr2	2197101	2197200
	Chr1	14431700	14431800		Chr2	2217201	2217300
	Chr1	14431900	14432000		Chr2	2217301	2217400
	Chr1	14432200	14432300		Chr2	2217501	2217600
	Chr1	14432900	14433000		Chr2	2218901	2219000
	Chr1	14433600	14433700		Chr2	2232201	2232300
	Chr1	14434000	14434100		Chr2	2232301	2232400
	Chr1	14434200	14434300		Chr2	2260701	2260800
	Chr1	14434600	14434700		Chr2	2262301	2262400
	Chr1	1443400	1443500		Chr2	2284201	2284300
	Chr1	14435200	14435300		Chr2	2284401	2284500
	Chr1	14435300	14435400		Chr2	2319901	2320000
	Chr1	14435400	14435500		Chr2	2321801	2321900
	Chr1	14435500	14435600		Chr2	2332201	2332300
	Chr1	14435600	14435700		Chr2	2336401	2336500
	Chr1	14435800	14435900		Chr2	2362801	2362900
	Chr1	1443500	1443600		Chr2	241801	241900
	Chr1	14435900	14436000		Chr2	241901	242000
	Chr1	14436400	14436500		Chr2	254301	254400
	Chr1	14436600	14436700		Chr2	254401	254500
	Chr1	14436800	14436900		Chr2	2590801	2590900
	Chr1	1443600	1443700		Chr2	2600901	2601000
	Chr1	14437000	14437100		Chr2	266201	266300
	Chr1	14437100	14437200		Chr2	2696501	2696600
	Chr1	14437200	14437300		Chr2	2731101	2731200
	Chr1	14437600	14437700		Chr2	275201	275300
	Chr1	14438100	14438200		Chr2	275901	276000
	Chr1	14438300	14438400		Chr2	276801	276900
	Chr1	14438800	14438900		Chr2	2843801	2843900
	Chr1	14439700	14439800		Chr2	2844301	2844400
	Chr1	1443900	1444000		Chr2	2844401	2844500
	Chr1	14440000	14440100		Chr2	2844601	2844700
	Chr1	14440300	14440400		Chr2	2902301	2902400
	Chr1	14442300	14442400		Chr2	2919701	2919800
	Chr1	14442400	14442500		Chr2	2923801	2923900
	Chr1	14442500	14442600		Chr2	2923901	2924000
	Chr1	14442600	14442700		Chr2	292701	292800
	Chr1	1444200	1444300		Chr2	293201	293300
	Chr1	14442900	14443000		Chr2	2985101	2985200
	Chr1	1444300	1444400		Chr2	2985201	2985300
	Chr1	14445100	14445200		Chr2	3014501	3014600
	Chr1	14446800	14446900		Chr2	303301	303400
	Chr1	14447100	14447200		Chr2	305801	305900
	Chr1	14448100	14448200		Chr2	305901	306000
	Chr1	14448500	14448600		Chr2	314701	314800
	Chr1	14448600	14448700		Chr2	324201	324300
	Chr1	14448900	14449000		Chr2	353001	353100
	Chr1	14450400	14450500		Chr2	362501	362600
	Chr1	14450800	14450900		Chr2	362601	362700
	Chr1	14451300	14451400		Chr2	368401	368500
	Chr1	14451400	14451500		Chr2	368501	368600
	Chr1	14451800	14451900		Chr2	384601	384700
	Chr1	14452300	14452400		Chr2	3986501	3986600
	Chr1	14452500	14452600		Chr2	400101	400200
	Chr1	14452600	14452700		Chr2	400201	400300
	Chr1	14452900	14453000		Chr2	4007201	4007300
	Chr1	14453100	14453200		Chr2	4007301	4007400
	Chr1	14453400	14453500		Chr2	4007401	4007500
	Chr1	14453600	14453700		Chr2	407501	407600
	Chr1	14453800	14453900		Chr2	4145401	4145500
	Chr1	14454200	14454300		Chr2	4148001	4148100
	Chr1	14454600	14454700		Chr2	416301	416400
	Chr1	14454800	14454900		Chr2	424801	424900
	Chr1	14455200	14455300		Chr2	429201	429300
	Chr1	14455300	14455400		Chr2	4301601	4301700
	Chr1	14455400	14455500		Chr2	4306001	4306100
	Chr1	14455600	14455700		Chr2	4306201	4306300
	Chr1	14456300	14456400		Chr2	4353501	4353600
	Chr1	14460500	14460600		Chr2	4353601	4353700
	Chr1	14462600	14462700		Chr2	438601	438700
	Chr1	14462700	14462800		Chr2	438701	438800
	Chr1	14463100	14463200		Chr2	439701	439800
	Chr1	14463200	14463300		Chr2	4415701	4415800
	Chr1	14466500	14466600		Chr2	4415801	4415900
	Chr1	14467000	14467100		Chr2	4428601	4428700
	Chr1	14468200	14468300		Chr2	444901	445000
	Chr1	14469400	14469500		Chr2	4474101	4474200
	Chr1	14469600	14469700		Chr2	4476401	4476500
	Chr1	14471600	14471700		Chr2	4476501	4476600
	Chr1	14473000	14473100		Chr2	449801	449900
	Chr1	14474000	14474100		Chr2	450101	450200
	Chr1	14475300	14475400		Chr2	4618001	4618100
	Chr1	14475600	14475700		Chr2	465901	466000
	Chr1	14476000	14476100		Chr2	466001	466100
	Chr1	14476100	14476200		Chr2	472301	472400
	Chr1	14476200	14476300		Chr2	4871101	4871200
[truncated: 19,783 more rows]

## Sheet: eu vs het TEs
	euchromatic_TEs (aka 'Class A')								heterochromatic_TEs (aka 'Class B')
	Chr1	17023	18924	AT1TE00025	+	1901	A		Chr1	781193	782748	AT1TE02540	-	1555	B
	Chr1	18330	18642	AT1TE00030	-	312	A		Chr1	1876437	1876508	AT1TE06140	-	71	B
	Chr1	55675	56576	AT1TE00150	+	901	A		Chr1	2157094	2157660	AT1TE07050	+	566	B
	Chr1	76843	77500	AT1TE00220	+	657	A		Chr1	2788429	2800701	AT1TE09080	+	12272	B
	Chr1	255711	256074	AT1TE00820	-	363	A		Chr1	2986347	2986950	AT1TE09700	-	603	B
	Chr1	257709	258629	AT1TE00840	-	920	A		Chr1	3250578	3251485	AT1TE10560	+	907	B
	Chr1	422673	424055	AT1TE01370	+	1382	A		Chr1	3360625	3361316	AT1TE10935	-	691	B
	Chr1	431309	431469	AT1TE01390	+	160	A		Chr1	3551135	3552618	AT1TE11565	-	1483	B
	Chr1	431473	431916	AT1TE01395	-	443	A		Chr1	3780764	3785721	AT1TE12295	+	4957	B
	Chr1	431916	432073	AT1TE01400	+	157	A		Chr1	4329876	4334393	AT1TE14085	+	4517	B
	Chr1	432994	433837	AT1TE01405	-	843	A		Chr1	4405995	4411119	AT1TE14315	-	5124	B
	Chr1	499134	501371	AT1TE01615	-	2237	A		Chr1	4785273	4787837	AT1TE15510	+	2564	B
	Chr1	512692	513136	AT1TE01665	-	444	A		Chr1	5100441	5100610	AT1TE16505	+	169	B
	Chr1	540416	540985	AT1TE01750	-	569	A		Chr1	5391426	5392691	AT1TE17415	+	1265	B
	Chr1	587409	588054	AT1TE01910	-	645	A		Chr1	5657944	5659382	AT1TE18295	-	1438	B
	Chr1	634245	634464	AT1TE02060	+	219	A		Chr1	5691739	5696671	AT1TE18410	+	4932	B
	Chr1	639129	641133	AT1TE02075	+	2004	A		Chr1	5911724	5916535	AT1TE19130	+	4811	B
	Chr1	669866	670631	AT1TE02175	-	765	A		Chr1	5958627	5959682	AT1TE19270	-	1055	B
	Chr1	696446	697372	AT1TE02265	-	926	A		Chr1	6196418	6197401	AT1TE20035	+	983	B
	Chr1	758534	760505	AT1TE02465	+	1971	A		Chr1	6211688	6211987	AT1TE20090	+	299	B
	Chr1	821946	822571	AT1TE02690	-	625	A		Chr1	6236162	6236229	AT1TE20185	+	67	B
	Chr1	1160068	1161330	AT1TE03785	+	1262	A		Chr1	6405272	6405391	AT1TE20760	+	119	B
	Chr1	1184969	1185352	AT1TE03860	-	383	A		Chr1	6515317	6515466	AT1TE21135	+	149	B
	Chr1	1194344	1195166	AT1TE03900	+	822	A		Chr1	6704196	6709404	AT1TE21710	+	5208	B
	Chr1	1275794	1276621	AT1TE04165	-	827	A		Chr1	7035030	7037376	AT1TE22750	+	2346	B
	Chr1	1286662	1287069	AT1TE04205	+	407	A		Chr1	7066492	7071562	AT1TE22850	+	5070	B
	Chr1	1379289	1380001	AT1TE04500	+	712	A		Chr1	7071562	7071716	AT1TE22865	+	154	B
	Chr1	1430271	1430424	AT1TE04660	-	153	A		Chr1	7352929	7365197	AT1TE23740	-	12268	B
	Chr1	1430437	1430836	AT1TE04665	+	400	A		Chr1	7528105	7529158	AT1TE24255	+	1053	B
	Chr1	1430837	1430859	AT1TE04670	+	23	A		Chr1	7714707	7722547	AT1TE24850	+	7840	B
	Chr1	1430868	1431028	AT1TE04675	-	160	A		Chr1	7761200	7762110	AT1TE24955	-	910	B
	Chr1	1441740	1442976	AT1TE04710	+	1236	A		Chr1	7960123	7961263	AT1TE25615	-	1140	B
	Chr1	1442976	1443007	AT1TE04715	+	31	A		Chr1	7969360	7974385	AT1TE25645	+	5025	B
	Chr1	1443561	1443971	AT1TE04720	+	410	A		Chr1	8043907	8044269	AT1TE25880	-	362	B
	Chr1	1444363	1444532	AT1TE04725	+	169	A		Chr1	8453485	8461797	AT1TE27295	+	8312	B
	Chr1	1476477	1476716	AT1TE04830	+	239	A		Chr1	8576450	8578073	AT1TE27665	-	1623	B
	Chr1	1522770	1522971	AT1TE05000	-	201	A		Chr1	8644567	8645833	AT1TE27905	-	1266	B
	Chr1	1592655	1593745	AT1TE05225	+	1090	A		Chr1	8729255	8733277	AT1TE28175	+	4022	B
	Chr1	1613271	1614662	AT1TE05280	-	1391	A		Chr1	8790240	8797988	AT1TE28370	-	7748	B
	Chr1	1676363	1677158	AT1TE05485	+	795	A		Chr1	8793537	8794372	AT1TE28380	+	835	B
	Chr1	1705374	1706660	AT1TE05585	+	1286	A		Chr1	8927731	8933058	AT1TE28830	-	5327	B
	Chr1	1738943	1739205	AT1TE05700	+	262	A		Chr1	9004835	9015724	AT1TE29060	+	10889	B
	Chr1	1974853	1975397	AT1TE06465	+	544	A		Chr1	9304764	9305904	AT1TE29990	-	1140	B
	Chr1	1975441	1976072	AT1TE06470	+	631	A		Chr1	9368298	9368344	AT1TE30190	-	46	B
	Chr1	1976109	1977174	AT1TE06480	-	1065	A		Chr1	9368344	9373307	AT1TE30195	-	4963	B
	Chr1	2188894	2189266	AT1TE07150	-	372	A		Chr1	9385167	9386902	AT1TE30250	+	1735	B
	Chr1	2415019	2416036	AT1TE07880	+	1017	A		Chr1	9547196	9551187	AT1TE30770	-	3991	B
	Chr1	2472645	2473098	AT1TE08050	-	453	A		Chr1	9583971	9585625	AT1TE30880	+	1654	B
	Chr1	2473098	2473306	AT1TE08055	-	208	A		Chr1	9676476	9691257	AT1TE31190	-	14781	B
	Chr1	2531450	2534781	AT1TE08240	-	3331	A		Chr1	9900281	9901174	AT1TE31905	+	893	B
	Chr1	2587142	2588427	AT1TE08420	-	1285	A		Chr1	10021368	10021965	AT1TE32325	-	597	B
	Chr1	2657417	2657920	AT1TE08660	+	503	A		Chr1	10221754	10222388	AT1TE32995	-	634	B
	Chr1	3023385	3024890	AT1TE09820	-	1505	A		Chr1	10347383	10348529	AT1TE33455	+	1146	B
	Chr1	3073226	3075036	AT1TE09970	-	1810	A		Chr1	10357356	10363358	AT1TE33490	+	6002	B
	Chr1	3073311	3073623	AT1TE09975	+	312	A		Chr1	10421306	10421719	AT1TE33670	-	413	B
	Chr1	3342432	3343130	AT1TE10865	-	698	A		Chr1	10591369	10591988	AT1TE34255	-	619	B
	Chr1	3343468	3343773	AT1TE10875	-	305	A		Chr1	10660289	10660600	AT1TE34465	-	311	B
	Chr1	3413098	3413250	AT1TE11100	-	152	A		Chr1	10696713	10701584	AT1TE34580	+	4871	B
	Chr1	3413548	3414889	AT1TE11110	+	1341	A		Chr1	10778292	10778582	AT1TE34820	+	290	B
	Chr1	3427847	3427917	AT1TE11150	+	70	A		Chr1	10929424	10931699	AT1TE35305	-	2275	B
	Chr1	3497679	3498873	AT1TE11380	-	1194	A		Chr1	11021030	11021141	AT1TE35605	+	111	B
	Chr1	3498873	3498959	AT1TE11385	-	86	A		Chr1	11028439	11029458	AT1TE35630	-	1019	B
	Chr1	3547013	3547591	AT1TE11535	-	578	A		Chr1	11096889	11099331	AT1TE35855	-	2442	B
	Chr1	3547592	3547613	AT1TE11540	-	22	A		Chr1	11099331	11100277	AT1TE35860	-	946	B
	Chr1	3547613	3547648	AT1TE11545	-	35	A		Chr1	11148307	11152649	AT1TE36035	-	4342	B
	Chr1	3573162	3573682	AT1TE11630	-	520	A		Chr1	11174212	11175268	AT1TE36120	+	1057	B
	Chr1	3728968	3730413	AT1TE12135	+	1445	A		Chr1	11302245	11310368	AT1TE36570	-	8123	B
	Chr1	3761902	3762819	AT1TE12230	+	917	A		Chr1	11504086	11505147	AT1TE37210	+	1061	B
	Chr1	3762819	3762974	AT1TE12235	+	155	A		Chr1	11505147	11507634	AT1TE37215	+	2487	B
	Chr1	3762974	3763156	AT1TE12240	+	182	A		Chr1	11508352	11508500	AT1TE37220	-	148	B
	Chr1	3771002	3772133	AT1TE12275	-	1131	A		Chr1	11525390	11525686	AT1TE37300	+	296	B
	Chr1	3825780	3827697	AT1TE12430	-	1917	A		Chr1	11611212	11611817	AT1TE37590	+	605	B
	Chr1	3897177	3898168	AT1TE12675	-	991	A		Chr1	11648913	11649897	AT1TE37710	+	985	B
	Chr1	3925330	3926124	AT1TE12770	-	794	A		Chr1	11710254	11711644	AT1TE37935	-	1390	B
	Chr1	4093260	4093293	AT1TE13305	+	33	A		Chr1	11752260	11755077	AT1TE38090	+	2817	B
	Chr1	4093293	4094494	AT1TE13310	-	1201	A		Chr1	11789449	11794079	AT1TE38210	+	4630	B
	Chr1	4110103	4111021	AT1TE13365	+	918	A		Chr1	11834922	11836068	AT1TE38350	+	1146	B
	Chr1	4111110	4113062	AT1TE13375	+	1952	A		Chr1	11887151	11901703	AT1TE38530	+	14552	B
	Chr1	4209163	4209607	AT1TE13690	-	444	A		Chr1	11957934	11958234	AT1TE38700	+	300	B
	Chr1	4292789	4293327	AT1TE13960	-	538	A		Chr1	12016037	12020227	AT1TE38940	-	4190	B
	Chr1	4294088	4294188	AT1TE13970	+	100	A		Chr1	12040915	12041279	AT1TE39025	-	364	B
	Chr1	4405693	4405995	AT1TE14310	-	302	A		Chr1	12062735	12064146	AT1TE39105	-	1411	B
	Chr1	4415610	4415742	AT1TE14355	+	132	A		Chr1	12079832	12080605	AT1TE39145	-	773	B
	Chr1	4493274	4493928	AT1TE14600	+	654	A		Chr1	12142353	12142692	AT1TE39390	+	339	B
	Chr1	4582382	4583615	AT1TE14865	+	1233	A		Chr1	12172516	12177219	AT1TE39515	-	4703	B
	Chr1	4651558	4660722	AT1TE15090	-	9164	A		Chr1	12273259	12276388	AT1TE39880	-	3129	B
	Chr1	4683025	4685396	AT1TE15170	+	2371	A		Chr1	12282246	12282799	AT1TE39905	-	553	B
	Chr1	4706566	4708276	AT1TE15240	-	1710	A		Chr1	12286563	12287597	AT1TE39915	+	1034	B
	Chr1	4708276	4708466	AT1TE15245	+	190	A		Chr1	12291257	12292501	AT1TE39950	+	1244	B
	Chr1	4770059	4770663	AT1TE15445	-	604	A		Chr1	12297725	12298009	AT1TE39970	-	284	B
	Chr1	4966555	4967016	AT1TE16080	+	461	A		Chr1	12299158	12299179	AT1TE39980	-	21	B
	Chr1	5098848	5099142	AT1TE16500	+	294	A		Chr1	12299181	12299344	AT1TE39985	-	163	B
	Chr1	5197904	5198865	AT1TE16810	+	961	A		Chr1	12299344	12299623	AT1TE39990	-	279	B
	Chr1	5353334	5353756	AT1TE17300	-	422	A		Chr1	12300021	12300214	AT1TE39995	+	193	B
	Chr1	5359021	5359174	AT1TE17320	-	153	A		Chr1	12300214	12300968	AT1TE40000	-	754	B
	Chr1	5378224	5378613	AT1TE17370	+	389	A		Chr1	12333648	12338510	AT1TE40120	+	4862	B
	Chr1	5436720	5437872	AT1TE17555	-	1152	A		Chr1	12403229	12404876	AT1TE40340	-	1647	B
	Chr1	5531284	5531953	AT1TE17875	+	669	A		Chr1	12405286	12405918	AT1TE40345	-	632	B
	Chr1	5657320	5657736	AT1TE18285	-	416	A		Chr1	12406708	12410000	AT1TE40355	+	3292	B
	Chr1	5657736	5657944	AT1TE18290	-	208	A		Chr1	12425689	12426661	AT1TE40415	+	972	B
	Chr1	5679267	5681449	AT1TE18370	+	2182	A		Chr1	12466961	12467841	AT1TE40560	-	880	B
	Chr1	5681490	5681628	AT1TE18375	+	139	A		Chr1	12467042	12467291	AT1TE40565	-	249	B
	Chr1	5681695	5681873	AT1TE18385	+	178	A		Chr1	12467834	12468306	AT1TE40570	+	472	B
	Chr1	5862941	5863537	AT1TE18955	+	596	A		Chr1	12469066	12469123	AT1TE40590	+	57	B
	Chr1	5899207	5899868	AT1TE19090	-	661	A		Chr1	12470416	12471254	AT1TE40605	+	838	B
	Chr1	5965475	5967002	AT1TE19285	-	1527	A		Chr1	12499787	12500300	AT1TE40685	-	513	B
	Chr1	6009291	6014092	AT1TE19430	-	4801	A		Chr1	12554548	12555313	AT1TE40900	-	765	B
	Chr1	6074607	6075608	AT1TE19635	+	1001	A		Chr1	12562099	12564283	AT1TE40925	-	2184	B
	Chr1	6102454	6103091	AT1TE19730	+	638	A		Chr1	12566242	12568303	AT1TE40940	+	2061	B
	Chr1	6156400	6158864	AT1TE19910	-	2464	A		Chr1	12569338	12569583	AT1TE40950	-	245	B
	Chr1	6198002	6199615	AT1TE20040	-	1613	A		Chr1	12569583	12572711	AT1TE40955	-	3128	B
	Chr1	6211026	6211309	AT1TE20085	+	283	A		Chr1	12572722	12572963	AT1TE40960	-	241	B
	Chr1	6218530	6219237	AT1TE20110	-	707	A		Chr1	12593311	12593599	AT1TE41040	-	288	B
	Chr1	6233920	6235720	AT1TE20180	-	1800	A		Chr1	12603509	12603905	AT1TE41080	-	396	B
	Chr1	6236274	6237764	AT1TE20195	+	1490	A		Chr1	12630904	12631022	AT1TE41235	+	118	B
	Chr1	6273522	6276128	AT1TE20315	-	2606	A		Chr1	12633624	12636327	AT1TE41260	+	2703	B
	Chr1	6273768	6273906	AT1TE20320	-	139	A		Chr1	12664496	12673969	AT1TE41345	-	9473	B
	Chr1	6302581	6303156	AT1TE20410	+	575	A		Chr1	12674459	12684931	AT1TE41350	-	10472	B
	Chr1	6378718	6379470	AT1TE20665	+	752	A		Chr1	12699868	12701299	AT1TE41415	+	1431	B
	Chr1	6402869	6403656	AT1TE20745	-	787	A		Chr1	12713487	12728545	AT1TE41460	+	15058	B
	Chr1	6403763	6405272	AT1TE20755	-	1509	A		Chr1	12730089	12730320	AT1TE41470	+	231	B
	Chr1	6454676	6456015	AT1TE20925	+	1339	A		Chr1	12753511	12755059	AT1TE41575	+	1548	B
	Chr1	6470398	6470472	AT1TE20980	-	74	A		Chr1	12755059	12760395	AT1TE41580	+	5336	B
	Chr1	6514399	6515317	AT1TE21130	+	918	A		Chr1	12761603	12762391	AT1TE41590	+	788	B
	Chr1	6538418	6543539	AT1TE21210	+	5121	A		Chr1	12768946	12780004	AT1TE41625	-	11058	B
	Chr1	6556170	6556521	AT1TE21250	+	352	A		Chr1	12813937	12816180	AT1TE41735	+	2243	B
	Chr1	6573463	6574189	AT1TE21305	+	726	A		Chr1	12818272	12839582	AT1TE41745	+	21310	B
	Chr1	6574509	6575045	AT1TE21310	+	536	A		Chr1	12826807	12827497	AT1TE41750	+	690	B
	Chr1	6587128	6588246	AT1TE21355	-	1119	A		Chr1	12830336	12832135	AT1TE41765	-	1799	B
	Chr1	6589530	6589760	AT1TE21360	+	230	A		Chr1	12842157	12845721	AT1TE41800	+	3564	B
	Chr1	6593172	6594618	AT1TE21370	+	1446	A		Chr1	12856201	12862061	AT1TE41860	-	5860	B
	Chr1	6640486	6640989	AT1TE21515	-	503	A		Chr1	12897748	12899470	AT1TE42010	-	1722	B
	Chr1	6709615	6709729	AT1TE21715	+	114	A		Chr1	12899470	12899772	AT1TE42015	+	302	B
	Chr1	6715363	6715546	AT1TE21725	-	183	A		Chr1	12899876	12900120	AT1TE42025	-	244	B
	Chr1	6735678	6737670	AT1TE21790	+	1992	A		Chr1	12900120	12900445	AT1TE42030	+	325	B
	Chr1	6742978	6744224	AT1TE21805	+	1246	A		Chr1	12900445	12900825	AT1TE42035	-	380	B
	Chr1	6758934	6759700	AT1TE21840	+	766	A		Chr1	12901350	12901455	AT1TE42040	+	105	B
	Chr1	7023545	7024535	AT1TE22695	+	990	A		Chr1	12903458	12904712	AT1TE42050	-	1254	B
	Chr1	7026807	7028132	AT1TE22720	-	1325	A		Chr1	12904712	12905225	AT1TE42055	+	513	B
	Chr1	7132353	7132972	AT1TE23065	-	619	A		Chr1	12906564	12907856	AT1TE42080	+	1292	B
	Chr1	7138401	7139137	AT1TE23080	+	736	A		Chr1	12918636	12918772	AT1TE42110	-	136	B
	Chr1	7201687	7202131	AT1TE23270	-	444	A		Chr1	12925450	12926377	AT1TE42140	-	927	B
	Chr1	7227970	7228129	AT1TE23355	+	160	A		Chr1	12931861	12932284	AT1TE42170	-	423	B
	Chr1	7241159	7241362	AT1TE23390	+	204	A		Chr1	12942520	12942824	AT1TE42205	+	304	B
	Chr1	7241362	7241617	AT1TE23395	+	255	A		Chr1	12942824	12947010	AT1TE42210	+	4186	B
	Chr1	7248746	7250145	AT1TE23410	-	1399	A		Chr1	12949834	12953875	AT1TE42225	+	4041	B
	Chr1	7254946	7257226	AT1TE23420	-	2280	A		Chr1	12959521	12959966	AT1TE42250	-	445	B
	Chr1	7281533	7284779	AT1TE23505	+	3246	A		Chr1	12968373	12969313	AT1TE42290	-	940	B
	Chr1	7392260	7392513	AT1TE23830	+	253	A		Chr1	13000217	13005219	AT1TE42395	+	5002	B
	Chr1	7393252	7393404	AT1TE23835	+	153	A		Chr1	13006365	13007984	AT1TE42400	-	1619	B
	Chr1	7394405	7394765	AT1TE23840	-	360	A		Chr1	13010029	13011057	AT1TE42410	+	1028	B
	Chr1	7505040	7505756	AT1TE24165	-	716	A		Chr1	13011057	13012650	AT1TE42415	+	1593	B
	Chr1	7725247	7725868	AT1TE24855	+	621	A		Chr1	13019296	13019464	AT1TE42440	-	168	B
	Chr1	7729806	7730291	AT1TE24865	+	485	A		Chr1	13019464	13021045	AT1TE42445	-	1581	B
	Chr1	7766429	7766584	AT1TE24975	+	155	A		Chr1	13021046	13021159	AT1TE42450	-	114	B
	Chr1	7783016	7784339	AT1TE25025	+	1323	A		Chr1	13021228	13022484	AT1TE42465	-	1256	B
	Chr1	7786503	7787318	AT1TE25030	-	815	A		Chr1	13058485	13061316	AT1TE42635	+	2831	B
	Chr1	7787596	7787625	AT1TE25035	+	30	A		Chr1	13063769	13065302	AT1TE42660	-	1533	B
	Chr1	7809354	7810370	AT1TE25110	+	1016	A		Chr1	13080416	13081023	AT1TE42710	+	607	B
	Chr1	7810370	7812003	AT1TE25115	-	1633	A		Chr1	13081893	13082094	AT1TE42725	+	201	B
	Chr1	7833185	7834254	AT1TE25210	-	1069	A		Chr1	13088089	13089696	AT1TE42755	+	1607	B
	Chr1	7852211	7852860	AT1TE25275	-	649	A		Chr1	13131404	13140006	AT1TE42890	+	8602	B
	Chr1	7975861	7976602	AT1TE25655	-	741	A		Chr1	13172925	13178593	AT1TE43010	+	5668	B
	Chr1	7980708	7981263	AT1TE25665	+	555	A		Chr1	13178815	13179468	AT1TE43020	-	653	B
	Chr1	7981053	7981390	AT1TE25670	+	337	A		Chr1	13179468	13180611	AT1TE43025	+	1143	B
	Chr1	7985125	7986420	AT1TE25685	+	1295	A		Chr1	13180945	13181769	AT1TE43030	-	824	B
	Chr1	8053167	8053294	AT1TE25910	-	127	A		Chr1	13181964	13186591	AT1TE43040	-	4627	B
	Chr1	8114684	8116894	AT1TE26120	+	2210	A		Chr1	13187277	13192359	AT1TE43050	+	5082	B
	Chr1	8160055	8160565	AT1TE26260	+	510	A		Chr1	13230992	13235723	AT1TE43225	-	4731	B
	Chr1	8169558	8170783	AT1TE26305	+	1225	A		Chr1	13236248	13236549	AT1TE43230	-	301	B
	Chr1	8189828	8190549	AT1TE26370	+	721	A		Chr1	13236550	13236641	AT1TE43235	+	92	B
	Chr1	8235851	8237517	AT1TE26515	+	1666	A		Chr1	13236641	13237476	AT1TE43240	-	835	B
	Chr1	8237720	8237857	AT1TE26525	-	137	A		Chr1	13237481	13237795	AT1TE43245	+	314	B
	Chr1	8238454	8239849	AT1TE26535	-	1395	A		Chr1	13238145	13239070	AT1TE43250	-	925	B
	Chr1	8266506	8267531	AT1TE26625	-	1026	A		Chr1	13238342	13238467	AT1TE43255	-	125	B
	Chr1	8276494	8277489	AT1TE26665	-	995	A		Chr1	13240218	13240424	AT1TE43265	-	206	B
	Chr1	8277588	8279056	AT1TE26675	+	1468	A		Chr1	13240525	13240641	AT1TE43270	-	116	B
	Chr1	8288747	8289831	AT1TE26710	+	1084	A		Chr1	13240745	13241300	AT1TE43275	-	555	B
	Chr1	8289831	8289870	AT1TE26715	-	39	A		Chr1	13241300	13241322	AT1TE43280	-	22	B
	Chr1	8289870	8290484	AT1TE26720	+	614	A		Chr1	13245079	13245269	AT1TE43290	+	190	B
	Chr1	8290584	8292025	AT1TE26735	+	1441	A		Chr1	13245269	13247416	AT1TE43295	+	2147	B
	Chr1	8374634	8375371	AT1TE27030	+	737	A		Chr1	13247657	13250347	AT1TE43305	-	2690	B
	Chr1	8391610	8392741	AT1TE27095	+	1131	A		Chr1	13250347	13250446	AT1TE43310	-	99	B
	Chr1	8392154	8392420	AT1TE27100	+	266	A		Chr1	13256863	13257271	AT1TE43325	-	408	B
	Chr1	8471416	8472049	AT1TE27335	-	633	A		Chr1	13260165	13260813	AT1TE43340	-	648	B
	Chr1	8472049	8473869	AT1TE27340	+	1820	A		Chr1	13260813	13260951	AT1TE43345	-	138	B
	Chr1	8475176	8475479	AT1TE27345	-	303	A		Chr1	13260951	13263559	AT1TE43350	-	2608	B
	Chr1	8476058	8476379	AT1TE27350	+	321	A		Chr1	13263762	13276157	AT1TE43355	+	12395	B
	Chr1	8488222	8489149	AT1TE27390	-	927	A		Chr1	13285260	13285891	AT1TE43380	+	631	B
	Chr1	8489149	8490468	AT1TE27395	-	1319	A		Chr1	13295391	13296927	AT1TE43430	-	1536	B
	Chr1	8490640	8492849	AT1TE27405	+	2209	A		Chr1	13298355	13299022	AT1TE43440	+	667	B
	Chr1	8511951	8513159	AT1TE27470	-	1208	A		Chr1	13301629	13302052	AT1TE43455	+	423	B
	Chr1	8515351	8515706	AT1TE27475	-	355	A		Chr1	13302505	13303122	AT1TE43460	+	617	B
	Chr1	8538080	8538854	AT1TE27540	-	774	A		Chr1	13304426	13304737	AT1TE43480	+	311	B
	Chr1	8538890	8539819	AT1TE27550	+	929	A		Chr1	13305090	13305193	AT1TE43485	+	103	B
	Chr1	8573145	8573496	AT1TE27655	-	351	A		Chr1	13305432	13305993	AT1TE43495	-	561	B
	Chr1	8620663	8624017	AT1TE27810	-	3354	A		Chr1	13310768	13311277	AT1TE43505	+	509	B
	Chr1	8621830	8621888	AT1TE27815	+	58	A		Chr1	13311596	13312488	AT1TE43510	+	892	B
	Chr1	8622246	8623616	AT1TE27830	-	1370	A		Chr1	13324757	13329639	AT1TE43585	+	4882	B
	Chr1	8649241	8649670	AT1TE27915	+	429	A		Chr1	13336685	13336749	AT1TE43600	+	64	B
	Chr1	8690433	8690922	AT1TE28050	+	489	A		Chr1	13336749	13339482	AT1TE43605	+	2733	B
	Chr1	8778395	8778654	AT1TE28320	+	260	A		Chr1	13347744	13349384	AT1TE43640	+	1640	B
	Chr1	8778655	8778970	AT1TE28325	+	316	A		Chr1	13360591	13361126	AT1TE43705	-	535	B
	Chr1	8791595	8792382	AT1TE28375	+	787	A		Chr1	13371474	13386480	AT1TE43740	+	15006	B
	Chr1	8797988	8798224	AT1TE28390	-	236	A		Chr1	13392125	13393945	AT1TE43780	-	1820	B
	Chr1	8800897	8801182	AT1TE28395	+	286	A		Chr1	13397539	13400776	AT1TE43805	+	3237	B
	Chr1	8801183	8801459	AT1TE28400	+	277	A		Chr1	13400776	13401576	AT1TE43810	+	800	B
	Chr1	8815275	8815560	AT1TE28450	+	286	A		Chr1	13410458	13415145	AT1TE43865	-	4687	B
	Chr1	8815561	8815837	AT1TE28455	+	277	A		Chr1	13417657	13421489	AT1TE43880	-	3832	B
	Chr1	8829653	8829938	AT1TE28500	+	286	A		Chr1	13421803	13421949	AT1TE43890	-	146	B
	Chr1	8829939	8830254	AT1TE28505	+	316	A		Chr1	13423017	13423389	AT1TE43895	+	372	B
	Chr1	8869579	8869748	AT1TE28630	-	169	A		Chr1	13423402	13424407	AT1TE43900	-	1005	B
	Chr1	8870368	8871513	AT1TE28635	+	1146	A		Chr1	13425712	13426005	AT1TE43905	+	293	B
	Chr1	9018550	9019574	AT1TE29070	+	1024	A		Chr1	13426457	13430183	AT1TE43910	+	3726	B
	Chr1	9062304	9062678	AT1TE29205	+	374	A		Chr1	13430809	13430974	AT1TE43915	-	165	B
	Chr1	9082621	9082919	AT1TE29265	+	299	A		Chr1	13435229	13435560	AT1TE43950	+	331	B
	Chr1	9125776	9126902	AT1TE29390	-	1126	A		Chr1	13437314	13439349	AT1TE43960	+	2035	B
	Chr1	9135711	9136880	AT1TE29410	-	1169	A		Chr1	13439443	13448530	AT1TE43975	+	9087	B
	Chr1	9135756	9136720	AT1TE29415	-	964	A		Chr1	13476001	13477572	AT1TE44100	-	1571	B
	Chr1	9136880	9137784	AT1TE29420	-	904	A		Chr1	13479019	13480875	AT1TE44105	-	1856	B
	Chr1	9137784	9138030	AT1TE29425	-	246	A		Chr1	13480165	13480491	AT1TE44120	-	326	B
	Chr1	9138209	9138321	AT1TE29430	-	112	A		Chr1	13482747	13490426	AT1TE44125	-	7679	B
	Chr1	9175322	9177761	AT1TE29570	+	2439	A		Chr1	13499729	13500849	AT1TE44180	+	1120	B
	Chr1	9187619	9188638	AT1TE29605	+	1019	A		Chr1	13505093	13506749	AT1TE44215	-	1656	B
	Chr1	9204215	9205113	AT1TE29665	+	898	A		Chr1	13506749	13507194	AT1TE44220	-	445	B
	Chr1	9235932	9237369	AT1TE29770	-	1437	A		Chr1	13507194	13507779	AT1TE44225	-	585	B
	Chr1	9282960	9283901	AT1TE29920	-	941	A		Chr1	13507779	13515964	AT1TE44230	-	8185	B
	Chr1	9353785	9354276	AT1TE30130	-	491	A		Chr1	13515964	13517626	AT1TE44235	-	1662	B
	Chr1	9367448	9368006	AT1TE30185	+	558	A		Chr1	13517762	13520558	AT1TE44250	-	2796	B
	Chr1	9384159	9385031	AT1TE30240	-	872	A		Chr1	13520558	13524125	AT1TE44255	-	3567	B
	Chr1	9412333	9412459	AT1TE30330	+	126	A		Chr1	13525013	13527625	AT1TE44265	-	2612	B
	Chr1	9418062	9419054	AT1TE30365	-	992	A		Chr1	13548238	13549729	AT1TE44345	+	1491	B
	Chr1	9432182	9432422	AT1TE30410	+	240	A		Chr1	13559845	13564825	AT1TE44380	+	4980	B
	Chr1	9572800	9574191	AT1TE30840	-	1391	A		Chr1	13570068	13570521	AT1TE44420	-	453	B
	Chr1	9574361	9575371	AT1TE30845	-	1010	A		Chr1	13572049	13573262	AT1TE44435	-	1213	B
	Chr1	9582975	9583971	AT1TE30875	+	996	A		Chr1	13572182	13572386	AT1TE44440	-	204	B
	Chr1	9585784	9585964	AT1TE30885	+	180	A		Chr1	13573424	13576126	AT1TE44450	-	2702	B
	Chr1	9585964	9587249	AT1TE30890	-	1285	A		Chr1	13576126	13581525	AT1TE44455	-	5399	B
	Chr1	9587249	9587684	AT1TE30895	-	435	A		Chr1	13593058	13597322	AT1TE44525	+	4264	B
	Chr1	9756655	9756816	AT1TE31410	+	161	A		Chr1	13597674	13599711	AT1TE44535	+	2037	B
	Chr1	9762607	9762754	AT1TE31425	+	147	A		Chr1	13599711	13600943	AT1TE44540	+	1232	B
	Chr1	9815821	9818677	AT1TE31590	+	2856	A		Chr1	13601688	13603065	AT1TE44555	-	1377	B
	Chr1	9836130	9837644	AT1TE31660	-	1514	A		Chr1	13606761	13607807	AT1TE44575	+	1046	B
	Chr1	9862696	9863641	AT1TE31750	+	945	A		Chr1	13616743	13616953	AT1TE44595	+	210	B
	Chr1	9863024	9863166	AT1TE31755	+	143	A		Chr1	13617796	13623173	AT1TE44605	+	5377	B
	Chr1	9865345	9865642	AT1TE31770	-	297	A		Chr1	13621506	13622705	AT1TE44615	-	1199	B
	Chr1	9865642	9873666	AT1TE31775	+	8024	A		Chr1	13623932	13624551	AT1TE44625	-	619	B
	Chr1	9867365	9867414	AT1TE31780	-	49	A		Chr1	13625189	13632772	AT1TE44630	-	7583	B
	Chr1	9867414	9867437	AT1TE31785	+	23	A		Chr1	13643188	13644511	AT1TE44660	-	1323	B
	Chr1	9907901	9908868	AT1TE31930	+	967	A		Chr1	13644551	13648938	AT1TE44670	-	4387	B
	Chr1	9909362	9909762	AT1TE31935	+	400	A		Chr1	13649326	13650463	AT1TE44680	-	1137	B
	Chr1	9915356	9916480	AT1TE31970	-	1124	A		Chr1	13654402	13654645	AT1TE44700	-	243	B
	Chr1	9918157	9919330	AT1TE31985	-	1173	A		Chr1	13659272	13667557	AT1TE44720	+	8285	B
	Chr1	9926835	9927006	AT1TE32000	-	171	A		Chr1	13674277	13674877	AT1TE44755	-	600	B
	Chr1	9939336	9939673	AT1TE32040	+	337	A		Chr1	13676764	13677268	AT1TE44765	+	504	B
	Chr1	9957338	9958844	AT1TE32110	+	1506	A		Chr1	13677268	13680779	AT1TE44770	-	3511	B
	Chr1	10007529	10008021	AT1TE32270	+	492	A		Chr1	13690718	13693207	AT1TE44825	+	2489	B
	Chr1	10008021	10008663	AT1TE32275	+	642	A		Chr1	13704116	13706547	AT1TE44875	-	2431	B
	Chr1	10021965	10022005	AT1TE32330	-	40	A		Chr1	13708141	13709758	AT1TE44895	+	1617	B
	Chr1	10060619	10060876	AT1TE32455	-	257	A		Chr1	13712508	13714228	AT1TE44910	-	1720	B
	Chr1	10114659	10115025	AT1TE32625	+	366	A		Chr1	13714228	13714597	AT1TE44915	-	369	B
	Chr1	10152772	10154690	AT1TE32755	+	1918	A		Chr1	13714762	13715002	AT1TE44925	-	240	B
	Chr1	10155200	10156790	AT1TE32765	+	1590	A		Chr1	13715002	13716730	AT1TE44930	-	1728	B
	Chr1	10158914	10160017	AT1TE32785	+	1103	A		Chr1	13717240	13718566	AT1TE44940	-	1326	B
	Chr1	10160998	10161600	AT1TE32795	+	602	A		Chr1	13719499	13721663	AT1TE44945	+	2164	B
	Chr1	10206712	10207010	AT1TE32945	-	298	A		Chr1	13719685	13720042	AT1TE44950	+	357	B
	Chr1	10221013	10221279	AT1TE32990	+	266	A		Chr1	13723189	13724194	AT1TE44965	+	1005	B
	Chr1	10239320	10240195	AT1TE33075	+	875	A		Chr1	13725404	13725795	AT1TE44975	+	391	B
	Chr1	10314725	10315423	AT1TE33340	-	698	A		Chr1	13725795	13728135	AT1TE44980	-	2340	B
	Chr1	10347111	10347383	AT1TE33450	+	273	A		Chr1	13730390	13731324	AT1TE44985	+	934	B
	Chr1	10383675	10383893	AT1TE33555	-	218	A		Chr1	13731799	13732256	AT1TE44990	-	457	B
	Chr1	10443986	10444101	AT1TE33750	+	115	A		Chr1	13732511	13732706	AT1TE44995	+	195	B
	Chr1	10490333	10491121	AT1TE33905	-	788	A		Chr1	13732969	13734491	AT1TE45010	+	1522	B
	Chr1	10497530	10497719	AT1TE33920	+	190	A		Chr1	13734679	13743201	AT1TE45020	-	8522	B
	Chr1	10497746	10497855	AT1TE33925	+	109	A		Chr1	13744169	13744515	AT1TE45030	+	346	B
	Chr1	10506500	10507368	AT1TE33955	-	868	A		Chr1	13747237	13747657	AT1TE45035	+	420	B
	Chr1	10524717	10529695	AT1TE34015	+	4978	A		Chr1	13747815	13748091	AT1TE45045	+	276	B
	Chr1	10531994	10532076	AT1TE34040	+	82	A		Chr1	13751045	13757083	AT1TE45080	+	6038	B
	Chr1	10532076	10533434	AT1TE34045	+	1358	A		Chr1	13757098	13757122	AT1TE45085	+	24	B
	Chr1	10554478	10555084	AT1TE34125	-	606	A		Chr1	13757122	13758799	AT1TE45090	+	1677	B
	Chr1	10567971	10569320	AT1TE34170	+	1349	A		Chr1	13759679	13759975	AT1TE45095	-	296	B
	Chr1	10570148	10570425	AT1TE34180	+	277	A		Chr1	13759975	13761074	AT1TE45100	-	1099	B
	Chr1	10579208	10580491	AT1TE34215	+	1283	A		Chr1	13761074	13761108	AT1TE45105	+	34	B
	Chr1	10591988	10592110	AT1TE34260	-	122	A		Chr1	13761108	13761821	AT1TE45110	+	713	B
	Chr1	10597340	10598621	AT1TE34295	-	1281	A		Chr1	13764317	13765814	AT1TE45120	+	1497	B
	Chr1	10597578	10598342	AT1TE34300	+	764	A		Chr1	13768439	13768753	AT1TE45130	-	314	B
	Chr1	10602556	10604986	AT1TE34315	+	2430	A		Chr1	13768753	13777586	AT1TE45135	+	8833	B
	Chr1	10623649	10624994	AT1TE34365	-	1345	A		Chr1	13777610	13785849	AT1TE45145	-	8239	B
	Chr1	10652084	10653331	AT1TE34445	-	1247	A		Chr1	13779965	13781169	AT1TE45150	-	1204	B
	Chr1	10654143	10654665	AT1TE34450	-	523	A		Chr1	13782305	13784780	AT1TE45160	-	2475	B
	Chr1	10702614	10703021	AT1TE34590	-	407	A		Chr1	13785858	13786684	AT1TE45170	+	826	B
	Chr1	10723433	10725219	AT1TE34650	+	1786	A		Chr1	13786684	13795195	AT1TE45175	+	8511	B
	Chr1	10778582	10779157	AT1TE34825	+	575	A		Chr1	13800666	13801784	AT1TE45210	-	1118	B
	Chr1	10802425	10803341	AT1TE34895	-	916	A		Chr1	13803948	13806829	AT1TE45220	+	2881	B
	Chr1	10852625	10853287	AT1TE35060	-	662	A		Chr1	13811477	13811632	AT1TE45270	+	155	B
	Chr1	10866668	10867813	AT1TE35100	-	1145	A		Chr1	13813423	13813893	AT1TE45295	-	470	B
	Chr1	10867088	10867731	AT1TE35105	-	643	A		Chr1	13818559	13823827	AT1TE45315	+	5268	B
	Chr1	10913483	10913793	AT1TE35245	-	310	A		Chr1	13825125	13826189	AT1TE45330	-	1064	B
	Chr1	10914998	10915973	AT1TE35250	+	975	A		Chr1	13827363	13827495	AT1TE45345	-	132	B
	Chr1	10920811	10920864	AT1TE35270	-	54	A		Chr1	13827495	13828484	AT1TE45350	-	989	B
	Chr1	10920881	10921401	AT1TE35275	-	520	A		Chr1	13828484	13832149	AT1TE45355	+	3665	B
	Chr1	10922412	10923823	AT1TE35280	-	1411	A		Chr1	13832175	13834264	AT1TE45360	-	2089	B
	Chr1	10924715	10924942	AT1TE35290	-	227	A		Chr1	13834264	13835790	AT1TE45365	-	1526	B
	Chr1	10931893	10931943	AT1TE35315	+	50	A		Chr1	13842618	13847118	AT1TE45395	-	4500	B
	Chr1	10932103	10932148	AT1TE35320	-	45	A		Chr1	13849633	13850166	AT1TE45410	+	533	B
	Chr1	10932148	10932697	AT1TE35325	-	549	A		Chr1	13850478	13851106	AT1TE45415	+	628	B
	Chr1	10982119	10982866	AT1TE35460	+	747	A		Chr1	13851107	13851141	AT1TE45420	+	35	B
	Chr1	10982870	10983613	AT1TE35465	-	743	A		Chr1	13851264	13852459	AT1TE45425	+	1195	B
	Chr1	11005735	11006300	AT1TE35530	+	565	A		Chr1	13854429	13855683	AT1TE45430	-	1254	B
	Chr1	11006301	11006531	AT1TE35535	+	230	A		Chr1	13855683	13856298	AT1TE45435	+	615	B
	Chr1	11006531	11006659	AT1TE35540	-	128	A		Chr1	13860027	13860223	AT1TE45455	-	196	B
	Chr1	11016005	11016462	AT1TE35575	+	457	A		Chr1	13860289	13861071	AT1TE45465	-	782	B
	Chr1	11019473	11020246	AT1TE35590	-	773	A		Chr1	13862958	13864749	AT1TE45475	-	1791	B
	Chr1	11020315	11020416	AT1TE35600	+	101	A		Chr1	13865722	13867368	AT1TE45480	+	1646	B
	Chr1	11027750	11027971	AT1TE35620	+	221	A		Chr1	13869520	13869865	AT1TE45490	+	345	B
	Chr1	11027971	11028439	AT1TE35625	-	468	A		Chr1	13869865	13870461	AT1TE45495	+	596	B
	Chr1	11032189	11032309	AT1TE35635	+	120	A		Chr1	13870688	13870808	AT1TE45505	+	120	B
	Chr1	11044864	11045603	AT1TE35670	+	739	A		Chr1	13871157	13871383	AT1TE45510	+	226	B
	Chr1	11048696	11051466	AT1TE35680	-	2770	A		Chr1	13873436	13876440	AT1TE45515	-	3004	B
	Chr1	11064455	11067139	AT1TE35720	-	2684	A		Chr1	13879034	13879890	AT1TE45530	-	856	B
	Chr1	11088816	11088840	AT1TE35815	-	24	A		Chr1	13881653	13882600	AT1TE45545	-	947	B
	Chr1	11088841	11089308	AT1TE35820	-	468	A		Chr1	13882664	13882982	AT1TE45555	-	318	B
	Chr1	11089361	11089469	AT1TE35830	-	108	A		Chr1	13883072	13890962	AT1TE45560	+	7890	B
	Chr1	11111657	11112104	AT1TE35900	+	447	A		Chr1	13894163	13894969	AT1TE45570	-	806	B
	Chr1	11125699	11126411	AT1TE35955	-	712	A		Chr1	13901966	13902395	AT1TE45615	+	429	B
	Chr1	11126985	11127156	AT1TE35970	-	171	A		Chr1	13902969	13903529	AT1TE45620	+	560	B
	Chr1	11132677	11132865	AT1TE35985	-	188	A		Chr1	13905141	13906966	AT1TE45635	+	1825	B
	Chr1	11148275	11148307	AT1TE36030	-	33	A		Chr1	13906967	13907589	AT1TE45640	+	623	B
	Chr1	11152649	11152684	AT1TE36040	-	35	A		Chr1	13908019	13908132	AT1TE45650	-	113	B
	Chr1	11153316	11156607	AT1TE36060	-	3291	A		Chr1	13908132	13908679	AT1TE45655	-	547	B
	Chr1	11204437	11204636	AT1TE36215	-	199	A		Chr1	13908679	13908729	AT1TE45660	-	50	B
	Chr1	11208789	11209066	AT1TE36245	-	277	A		Chr1	13908905	13910793	AT1TE45665	-	1888	B
	Chr1	11212271	11212543	AT1TE36255	+	272	A		Chr1	13912833	13913517	AT1TE45670	+	684	B
	Chr1	11241566	11241774	AT1TE36345	-	208	A		Chr1	13913795	13915110	AT1TE45680	+	1315	B
	Chr1	11241774	11242082	AT1TE36350	+	308	A		Chr1	13915199	13917482	AT1TE45695	+	2283	B
	Chr1	11280156	11280216	AT1TE36480	-	60	A		Chr1	13917577	13919016	AT1TE45705	+	1439	B
	Chr1	11280216	11285438	AT1TE36485	-	5222	A		Chr1	13920721	13922110	AT1TE45710	-	1389	B
	Chr1	11282851	11284969	AT1TE36505	-	2118	A		Chr1	13922110	13925068	AT1TE45715	+	2958	B
	Chr1	11286624	11287694	AT1TE36510	-	1070	A		Chr1	13925068	13928742	AT1TE45720	+	3674	B
	Chr1	11298444	11299452	AT1TE36550	+	1008	A		Chr1	13926980	13928028	AT1TE45730	+	1048	B
	Chr1	11301591	11301728	AT1TE36560	-	137	A		Chr1	13928742	13935988	AT1TE45735	+	7246	B
	Chr1	11302129	11302245	AT1TE36565	-	116	A		Chr1	13931785	13934802	AT1TE45750	+	3017	B
	Chr1	11315040	11316663	AT1TE36605	-	1623	A		Chr1	13933042	13934088	AT1TE45760	+	1046	B
	Chr1	11324440	11325667	AT1TE36630	+	1227	A		Chr1	13937843	13939631	AT1TE45780	+	1788	B
	Chr1	11351512	11352405	AT1TE36715	-	893	A		Chr1	13939977	13940762	AT1TE45785	+	785	B
	Chr1	11406654	11410513	AT1TE36890	-	3859	A		Chr1	13940762	13947032	AT1TE45790	-	6270	B
	Chr1	11422070	11422450	AT1TE36945	-	380	A		Chr1	13947032	13950715	AT1TE45795	-	3683	B
	Chr1	11427690	11428401	AT1TE36960	-	711	A		Chr1	13950717	13955653	AT1TE45800	-	4936	B
	Chr1	11451944	11453249	AT1TE37050	-	1305	A		Chr1	13959437	13961274	AT1TE45815	-	1837	B
	Chr1	11479600	11479728	AT1TE37140	+	128	A		Chr1	13968110	13979022	AT1TE45855	-	10912	B
	Chr1	11490271	11491439	AT1TE37170	+	1168	A		Chr1	13971992	13974028	AT1TE45860	+	2036	B
	Chr1	11492840	11493647	AT1TE37180	-	807	A		Chr1	13979217	13979451	AT1TE45885	-	234	B
	Chr1	11516075	11516131	AT1TE37250	-	56	A		Chr1	13979640	13981876	AT1TE45895	-	2236	B
	Chr1	11517045	11517911	AT1TE37260	-	866	A		Chr1	13985696	13986104	AT1TE45910	+	408	B
	Chr1	11517916	11521322	AT1TE37265	-	3406	A		Chr1	13990253	13990465	AT1TE45930	+	212	B
	Chr1	11521625	11523416	AT1TE37275	-	1791	A		Chr1	13991583	13991688	AT1TE45950	-	105	B
	Chr1	11525686	11527099	AT1TE37305	-	1413	A		Chr1	13991688	13994017	AT1TE45955	-	2329	B
	Chr1	11550281	11551141	AT1TE37390	+	860	A		Chr1	13994017	13994948	AT1TE45960	-	931	B
	Chr1	11617702	11619060	AT1TE37610	+	1358	A		Chr1	13994948	13996527	AT1TE45965	-	1579	B
	Chr1	11631745	11632526	AT1TE37645	+	781	A		Chr1	13996686	13998078	AT1TE45970	-	1392	B
	Chr1	11636076	11637042	AT1TE37660	+	966	A		Chr1	14021369	14024147	AT1TE46065	+	2778	B
	Chr1	11643079	11643309	AT1TE37680	+	230	A		Chr1	14033277	14038199	AT1TE46095	-	4922	B
	Chr1	11644393	11644558	AT1TE37685	-	165	A		Chr1	14042046	14042700	AT1TE46120	-	654	B
	Chr1	11647425	11648912	AT1TE37705	+	1487	A		Chr1	14043264	14043720	AT1TE46130	-	456	B
	Chr1	11666452	11666871	AT1TE37770	-	420	A		Chr1	14043720	14043937	AT1TE46135	-	217	B
	Chr1	11669319	11670243	AT1TE37790	-	924	A		Chr1	14044361	14045934	AT1TE46140	+	1573	B
	Chr1	11692362	11692500	AT1TE37865	-	139	A		Chr1	14046609	14047062	AT1TE46150	-	453	B
	Chr1	11692896	11693034	AT1TE37870	-	139	A		Chr1	14053504	14054914	AT1TE46170	+	1410	B
	Chr1	11693330	11693686	AT1TE37875	-	356	A		Chr1	14054914	14054966	AT1TE46175	+	52	B
	Chr1	11699257	11701926	AT1TE37890	+	2669	A		Chr1	14056416	14058432	AT1TE46180	-	2016	B
	Chr1	11703840	11704294	AT1TE37905	-	454	A		Chr1	14062306	14063914	AT1TE46215	+	1608	B
	Chr1	11704457	11704896	AT1TE37910	-	439	A		Chr1	14064356	14067482	AT1TE46220	-	3126	B
	Chr1	11704896	11705026	AT1TE37915	-	130	A		Chr1	14069499	14070821	AT1TE46230	+	1322	B
	Chr1	11706445	11708850	AT1TE37925	+	2405	A		Chr1	14070821	14075427	AT1TE46235	+	4606	B
	Chr1	11720280	11722435	AT1TE37975	+	2155	A		Chr1	14076942	14080234	AT1TE46255	-	3292	B
	Chr1	11732354	11732947	AT1TE38015	+	593	A		Chr1	14080250	14082586	AT1TE46260	+	2336	B
	Chr1	11733122	11733160	AT1TE38025	+	38	A		Chr1	14082586	14094068	AT1TE46265	+	11482	B
	Chr1	11734829	11735185	AT1TE38030	+	356	A		Chr1	14094068	14097504	AT1TE46270	+	3436	B
	Chr1	11735185	11737670	AT1TE38035	-	2485	A		Chr1	14098633	14101812	AT1TE46305	-	3179	B
	Chr1	11782552	11783489	AT1TE38195	-	937	A		Chr1	14101822	14107573	AT1TE46310	-	5751	B
	Chr1	11783489	11783570	AT1TE38200	-	81	A		Chr1	14107573	14108708	AT1TE46325	-	1135	B
	Chr1	11803470	11804092	AT1TE38245	-	622	A		Chr1	14109013	14112560	AT1TE46330	-	3547	B
	Chr1	11804092	11804334	AT1TE38250	-	242	A		Chr1	14113718	14114341	AT1TE46335	-	623	B
	Chr1	11805614	11806799	AT1TE38260	-	1185	A		Chr1	14114770	14115220	AT1TE46350	-	450	B
	Chr1	11817657	11818739	AT1TE38300	-	1082	A		Chr1	14116033	14116840	AT1TE46355	-	807	B
	Chr1	11826496	11827062	AT1TE38325	-	566	A		Chr1	14120422	14121025	AT1TE46375	+	603	B
	Chr1	11831779	11832816	AT1TE38340	+	1037	A		Chr1	14121719	14125084	AT1TE46385	-	3365	B
	Chr1	11834650	11834922	AT1TE38345	+	273	A		Chr1	14125084	14127032	AT1TE46390	-	1948	B
	Chr1	11836740	11836893	AT1TE38360	+	154	A		Chr1	14127034	14128352	AT1TE46395	-	1318	B
	Chr1	11861676	11861876	AT1TE38445	+	200	A		Chr1	14129760	14134840	AT1TE46405	-	5080	B
	Chr1	11958316	11959087	AT1TE38705	+	771	A		Chr1	14139495	14139675	AT1TE46420	+	180	B
	Chr1	11960835	11961029	AT1TE38710	-	194	A		Chr1	14140132	14140939	AT1TE46430	+	807	B
	Chr1	11979620	11982674	AT1TE38775	+	3054	A		Chr1	14144208	14144306	AT1TE46440	-	98	B
	Chr1	11982674	11983039	AT1TE38780	+	365	A		Chr1	14144306	14145694	AT1TE46445	-	1388	B
	Chr1	11987778	11988416	AT1TE38820	+	638	A		Chr1	14165866	14166066	AT1TE46520	+	200	B
	Chr1	11990878	11992997	AT1TE38835	+	2119	A		Chr1	14178068	14183542	AT1TE46575	-	5474	B
	Chr1	12009494	12009841	AT1TE38900	+	347	A		Chr1	14186799	14187334	AT1TE46610	-	535	B
	Chr1	12010328	12010496	AT1TE38905	+	169	A		Chr1	14187557	14188058	AT1TE46620	+	501	B
	Chr1	12012508	12013095	AT1TE38915	-	587	A		Chr1	14188116	14193130	AT1TE46625	+	5014	B
	Chr1	12013095	12013397	AT1TE38920	+	302	A		Chr1	14193584	14194819	AT1TE46630	-	1235	B
	Chr1	12013702	12014340	AT1TE38925	+	638	A		Chr1	14196922	14206946	AT1TE46635	-	10024	B
	Chr1	12022702	12022870	AT1TE38955	+	169	A		Chr1	14207138	14208348	AT1TE46640	+	1210	B
	Chr1	12031580	12033193	AT1TE38985	+	1613	A		Chr1	14208773	14211194	AT1TE46645	+	2421	B
	Chr1	12038434	12039278	AT1TE39005	-	844	A		Chr1	14211194	14212645	AT1TE46650	+	1451	B
	Chr1	12041782	12042411	AT1TE39030	+	629	A		Chr1	14212698	14214745	AT1TE46660	+	2047	B
	Chr1	12080698	12080826	AT1TE39150	-	129	A		Chr1	14214746	14225656	AT1TE46665	-	10910	B
	Chr1	12084208	12084743	AT1TE39165	+	535	A		Chr1	14226700	14230059	AT1TE46685	+	3359	B
	Chr1	12096749	12097187	AT1TE39210	+	438	A		Chr1	14230070	14242310	AT1TE46690	+	12240	B
	Chr1	12097187	12097457	AT1TE39215	+	270	A		Chr1	14232763	14235750	AT1TE46700	+	2987	B
	Chr1	12097550	12098275	AT1TE39225	+	725	A		Chr1	14235750	14236844	AT1TE46710	+	1094	B
	Chr1	12131009	12131736	AT1TE39335	+	728	A		Chr1	14236844	14237008	AT1TE46715	+	164	B
	Chr1	12133220	12133331	AT1TE39340	-	111	A		Chr1	14237028	14237449	AT1TE46725	+	421	B
	Chr1	12136633	12137681	AT1TE39360	-	1048	A		Chr1	14237573	14241004	AT1TE46735	+	3431	B
	Chr1	12138861	12139089	AT1TE39370	-	228	A		Chr1	14242310	14242403	AT1TE46750	+	93	B
	Chr1	12139299	12139652	AT1TE39375	+	353	A		Chr1	14242403	14248337	AT1TE46755	+	5934	B
	Chr1	12140694	12141659	AT1TE39380	-	965	A		Chr1	14248337	14248936	AT1TE46760	+	599	B
	Chr1	12143017	12143178	AT1TE39400	-	161	A		Chr1	14248936	14255843	AT1TE46765	+	6907	B
	Chr1	12143178	12144154	AT1TE39405	+	976	A		Chr1	14255843	14257875	AT1TE46770	-	2032	B
	Chr1	12166867	12167019	AT1TE39495	+	152	A		Chr1	14257875	14259091	AT1TE46775	-	1216	B
	Chr1	12183386	12184077	AT1TE39530	-	691	A		Chr1	14259091	14261082	AT1TE46780	-	1991	B
	Chr1	12183405	12184060	AT1TE39535	-	655	A		Chr1	14262179	14263528	AT1TE46795	+	1349	B
	Chr1	12185143	12185281	AT1TE39545	-	139	A		Chr1	14263551	14273951	AT1TE46805	-	10400	B
	Chr1	12186336	12186783	AT1TE39560	+	447	A		Chr1	14267045	14268443	AT1TE46810	-	1398	B
	Chr1	12228768	12230816	AT1TE39710	-	2048	A		Chr1	14273955	14277544	AT1TE46825	+	3589	B
	Chr1	12230816	12231359	AT1TE39720	-	543	A		Chr1	14277550	14282138	AT1TE46830	-	4588	B
	Chr1	12240469	12241280	AT1TE39755	+	811	A		Chr1	14280174	14281809	AT1TE46835	-	1635	B
	Chr1	12246435	12247641	AT1TE39785	+	1206	A		Chr1	14287084	14287757	AT1TE46870	-	673	B
	Chr1	12249075	12249414	AT1TE39790	+	339	A		Chr1	14296549	14297935	AT1TE46925	-	1386	B
	Chr1	12252001	12252350	AT1TE39800	-	349	A		Chr1	14300271	14300406	AT1TE46955	-	135	B
	Chr1	12253056	12253455	AT1TE39810	-	399	A		Chr1	14301648	14302414	AT1TE46960	+	766	B
	Chr1	12263038	12263876	AT1TE39830	+	838	A		Chr1	14303552	14305530	AT1TE46990	-	1978	B
	Chr1	12264053	12264315	AT1TE39835	+	262	A		Chr1	14308460	14309469	AT1TE47005	-	1009	B
	Chr1	12264395	12264674	AT1TE39840	+	279	A		Chr1	14310436	14311679	AT1TE47020	+	1243	B
	Chr1	12264674	12264732	AT1TE39845	-	58	A		Chr1	14311850	14327652	AT1TE47035	+	15802	B
	Chr1	12271743	12272453	AT1TE39865	-	710	A		Chr1	14315189	14320850	AT1TE47050	+	5661	B
	Chr1	12277517	12277701	AT1TE39890	-	184	A		Chr1	14328155	14329803	AT1TE47080	+	1648	B
	Chr1	12297562	12297725	AT1TE39965	-	163	A		Chr1	14330004	14330413	AT1TE47085	+	409	B
	Chr1	12302962	12303213	AT1TE40010	+	251	A		Chr1	14331004	14332548	AT1TE47095	-	1544	B
	Chr1	12305759	12307523	AT1TE40020	-	1764	A		Chr1	14334335	14340693	AT1TE47105	+	6358	B
	Chr1	12327780	12330357	AT1TE40090	-	2578	A		Chr1	14341712	14344568	AT1TE47125	+	2857	B
	Chr1	12338574	12338648	AT1TE40130	-	74	A		Chr1	14346433	14346915	AT1TE47140	+	483	B
	Chr1	12362546	12363127	AT1TE40230	-	581	A		Chr1	14346918	14349130	AT1TE47145	+	2213	B
	Chr1	12363713	12363796	AT1TE40235	-	83	A		Chr1	14350912	14352041	AT1TE47175	+	1130	B
	Chr1	12363796	12366841	AT1TE40240	-	3045	A		Chr1	14355645	14356801	AT1TE47220	+	1157	B
	Chr1	12373457	12374091	AT1TE40265	+	634	A		Chr1	14357678	14358254	AT1TE47230	-	577	B
	Chr1	12387694	12388109	AT1TE40295	+	415	A		Chr1	14358255	14362049	AT1TE47235	-	3795	B
	Chr1	12389720	12390060	AT1TE40305	+	340	A		Chr1	14366401	14367659	AT1TE47265	-	1259	B
	Chr1	12440220	12440987	AT1TE40470	-	767	A		Chr1	14367660	14368377	AT1TE47275	-	718	B
	Chr1	12457685	12458343	AT1TE40525	+	658	A		Chr1	14368381	14375118	AT1TE47280	+	6738	B
	Chr1	12468655	12468734	AT1TE40575	-	79	A		Chr1	14375773	14377214	AT1TE47295	-	1442	B
	Chr1	12468905	12468972	AT1TE40580	-	67	A		Chr1	14381663	14383424	AT1TE47315	+	1762	B
	Chr1	12469123	12470347	AT1TE40595	-	1224	A		Chr1	14385032	14390221	AT1TE47340	+	5189	B
	Chr1	12470347	12470371	AT1TE40600	+	24	A		Chr1	14392086	14392568	AT1TE47360	+	483	B
	Chr1	12475264	12476769	AT1TE40615	-	1505	A		Chr1	14392569	14394783	AT1TE47365	+	2215	B
	Chr1	12476769	12478196	AT1TE40620	+	1427	A		Chr1	14396565	14397694	AT1TE47395	+	1130	B
	Chr1	12483086	12483559	AT1TE40640	-	473	A		Chr1	14401298	14402454	AT1TE47440	+	1157	B
	Chr1	12500394	12501185	AT1TE40690	-	791	A		Chr1	14403331	14403907	AT1TE47450	-	577	B
	Chr1	12506347	12508398	AT1TE40700	-	2051	A		Chr1	14403908	14407702	AT1TE47455	-	3795	B
	Chr1	12513238	12513824	AT1TE40725	+	586	A		Chr1	14412054	14413312	AT1TE47485	-	1259	B
	Chr1	12517271	12517462	AT1TE40735	+	191	A		Chr1	14413313	14414030	AT1TE47495	-	718	B
	Chr1	12525449	12525577	AT1TE40765	+	128	A		Chr1	14414031	14420771	AT1TE47500	+	6741	B
	Chr1	12525577	12526506	AT1TE40770	+	929	A		Chr1	14421426	14422867	AT1TE47515	-	1442	B
	Chr1	12526506	12526885	AT1TE40775	+	379	A		Chr1	14427318	14427921	AT1TE47535	+	604	B
	Chr1	12527297	12527325	AT1TE40790	+	28	A		Chr1	14427921	14449178	AT1TE47540	+	21257	B
	Chr1	12530215	12530262	AT1TE40805	+	47	A		Chr1	14432222	14442952	AT1TE47550	+	10730	B
	Chr1	12530262	12530392	AT1TE40810	-	130	A		Chr1	14451910	14457104	AT1TE47580	+	5194	B
	Chr1	12547959	12548355	AT1TE40870	+	396	A		Chr1	14458838	14458884	AT1TE47600	+	47	B
	Chr1	12565292	12565672	AT1TE40930	+	380	A		Chr1	14459459	14461676	AT1TE47605	+	2217	B
	Chr1	12565672	12565951	AT1TE40935	-	279	A		Chr1	14462781	14463254	AT1TE47610	+	473	B
	Chr1	12574603	12574908	AT1TE40975	+	305	A		Chr1	14464209	14465550	AT1TE47630	+	1341	B
	Chr1	12576207	12576510	AT1TE40980	-	304	A		Chr1	14466419	14467530	AT1TE47640	+	1111	B
	Chr1	12590347	12590958	AT1TE41020	-	611	A		Chr1	14467537	14468313	AT1TE47645	-	776	B
	Chr1	12592610	12592835	AT1TE41025	-	225	A		Chr1	14468752	14472769	AT1TE47655	-	4017	B
	Chr1	12592984	12593289	AT1TE41030	-	305	A		Chr1	14470210	14470653	AT1TE47660	+	443	B
	Chr1	12594591	12594729	AT1TE41055	+	138	A		Chr1	14474711	14476323	AT1TE47675	+	1612	B
	Chr1	12610548	12611119	AT1TE41115	+	571	A		Chr1	14476830	14478089	AT1TE47685	-	1259	B
	Chr1	12614601	12615151	AT1TE41140	-	550	A		Chr1	14478089	14478727	AT1TE47690	-	638	B
	Chr1	12618480	12618546	AT1TE41165	+	66	A		Chr1	14478943	14480394	AT1TE47700	-	1451	B
	Chr1	12618546	12619858	AT1TE41170	+	1312	A		Chr1	14482198	14483890	AT1TE47710	-	1692	B
	Chr1	12626456	12630547	AT1TE41230	+	4091	A		Chr1	14484871	14486672	AT1TE47715	+	1801	B
	Chr1	12633185	12633406	AT1TE41250	+	221	A		Chr1	14487436	14492869	AT1TE47720	+	5433	B
	Chr1	12636327	12636722	AT1TE41265	+	395	A		Chr1	14504548	14507555	AT1TE47780	+	3007	B
	Chr1	12646095	12646216	AT1TE41295	-	121	A		Chr1	14538941	14540986	AT1TE47880	-	2045	B
	Chr1	12651409	12651914	AT1TE41310	+	505	A		Chr1	14582193	14587448	AT1TE48020	-	5255	B
	Chr1	12653039	12653378	AT1TE41315	+	339	A		Chr1	14587448	14588322	AT1TE48025	-	874	B
	Chr1	12662730	12662924	AT1TE41340	-	194	A		Chr1	14588473	14590167	AT1TE48030	-	1694	B
	Chr1	12688764	12688951	AT1TE41360	+	187	A		Chr1	14590167	14598729	AT1TE48035	-	8562	B
	Chr1	12691420	12691532	AT1TE41385	-	112	A		Chr1	14598729	14600111	AT1TE48040	-	1382	B
	Chr1	12692263	12692502	AT1TE41390	-	239	A		Chr1	14600111	14602815	AT1TE48045	+	2704	B
	Chr1	12728937	12729681	AT1TE41465	+	744	A		Chr1	14603198	14608644	AT1TE48050	-	5446	B
	Chr1	12730320	12730489	AT1TE41475	-	169	A		Chr1	14664772	14669652	AT1TE48230	-	4880	B
	Chr1	12732945	12733344	AT1TE41490	-	399	A		Chr1	14714186	14717295	AT1TE48370	+	3109	B
	Chr1	12733350	12733441	AT1TE41495	-	91	A		Chr1	14747212	14750320	AT1TE48475	-	3109	B
	Chr1	12733500	12734177	AT1TE41500	+	677	A		Chr1	14805638	14816078	AT1TE48660	+	10440	B
	Chr1	12734326	12734552	AT1TE41505	+	227	A		Chr1	14816664	14818335	AT1TE48670	+	1672	B
	Chr1	12738312	12740004	AT1TE41525	-	1692	A		Chr1	14831876	14832919	AT1TE48710	+	1044	B
	Chr1	12742983	12743403	AT1TE41545	+	420	A		Chr1	14833179	14835287	AT1TE48720	-	2108	B
	Chr1	12760395	12761574	AT1TE41585	-	1179	A		Chr1	14837663	14845083	AT1TE48730	-	7420	B
	Chr1	12845960	12846615	AT1TE41815	+	656	A		Chr1	14845083	14847384	AT1TE48735	-	2301	B
	Chr1	12847930	12849661	AT1TE41820	+	1731	A		Chr1	14847804	14857361	AT1TE48745	+	9557	B
	Chr1	12854294	12854914	AT1TE41835	+	620	A		Chr1	14857362	14859911	AT1TE48750	-	2550	B
	Chr1	12855065	12856081	AT1TE41850	-	1016	A		Chr1	14864081	14865438	AT1TE48760	+	1357	B
	Chr1	12862268	12863217	AT1TE41865	+	949	A		Chr1	14865438	14874995	AT1TE48765	-	9557	B
	Chr1	12866228	12866248	AT1TE41870	-	21	A		Chr1	14875415	14885131	AT1TE48775	+	9716	B
	Chr1	12866248	12866863	AT1TE41875	-	615	A		Chr1	14891976	14897732	AT1TE48830	-	5756	B
	Chr1	12870144	12870313	AT1TE41890	+	169	A		Chr1	14897775	14908757	AT1TE48835	-	10982	B
	Chr1	12872949	12876830	AT1TE41905	+	3881	A		Chr1	14910878	14912856	AT1TE48850	+	1978	B
	Chr1	12888143	12888251	AT1TE41950	+	108	A		Chr1	14913116	14914150	AT1TE48860	-	1034	B
	Chr1	12889974	12890257	AT1TE41965	+	283	A		Chr1	14918652	14919246	AT1TE48880	-	594	B
	Chr1	12894687	12895316	AT1TE41980	+	629	A		Chr1	14922821	14923070	AT1TE48895	-	249	B
	Chr1	12894922	12895203	AT1TE41985	-	282	A		Chr1	14923605	14926963	AT1TE48905	+	3358	B
	Chr1	12895316	12896538	AT1TE41995	-	1222	A		Chr1	14999727	15000074	AT1TE49145	+	347	B
	Chr1	12906167	12906289	AT1TE42070	+	122	A		Chr1	15006088	15007723	AT1TE49155	-	1635	B
	Chr1	12919718	12920220	AT1TE42125	-	502	A		Chr1	15038154	15052790	AT1TE49260	-	14636	B
	Chr1	12926913	12927191	AT1TE42150	+	278	A		Chr1	15053676	15056565	AT1TE49265	+	2889	B
	Chr1	12930131	12930287	AT1TE42155	+	156	A		Chr1	15057068	15058248	AT1TE49280	-	1180	B
	Chr1	12957924	12958268	AT1TE42245	+	344	A		Chr1	15058248	15060097	AT1TE49285	-	1849	B
	Chr1	12961829	12962163	AT1TE42255	-	334	A		Chr1	15060126	15061270	AT1TE49295	-	1144	B
	Chr1	12966327	12966899	AT1TE42275	-	572	A		Chr1	15061270	15069809	AT1TE49300	-	8539	B
	Chr1	12968088	12968373	AT1TE42285	-	286	A		Chr1	15069809	15074155	AT1TE49320	-	4346	B
	Chr1	12976098	12976857	AT1TE42315	-	759	A		Chr1	15074169	15076081	AT1TE49325	-	1912	B
	Chr1	12976857	12976942	AT1TE42320	+	85	A		Chr1	15076083	15078266	AT1TE49330	-	2183	B
	Chr1	12980300	12980537	AT1TE42335	-	237	A		Chr1	15079960	15081161	AT1TE49345	+	1201	B
	Chr1	12985129	12986235	AT1TE42345	-	1106	A		Chr1	15087256	15087580	AT1TE49360	+	324	B
	Chr1	12987699	12987862	AT1TE42350	+	164	A		Chr1	15089939	15091579	AT1TE49375	-	1640	B
	Chr1	12992996	12993612	AT1TE42370	-	616	A		Chr1	15139695	15142452	AT1TE49675	+	2757	B
	Chr1	13015326	13017802	AT1TE42430	+	2476	A		Chr1	15142452	15142841	AT1TE49680	+	389	B
	Chr1	13023621	13023787	AT1TE42470	-	166	A		Chr1	15145719	15149691	AT1TE49715	-	3972	B
	Chr1	13028439	13028711	AT1TE42490	+	272	A		Chr1	15151061	15158195	AT1TE49740	+	7134	B
	Chr1	13030272	13030468	AT1TE42500	-	196	A		Chr1	15160856	15166563	AT1TE49755	+	5707	B
	Chr1	13034009	13034370	AT1TE42535	+	361	A		Chr1	15178936	15186992	AT1TE49845	+	8056	B
	Chr1	13036816	13037383	AT1TE42550	-	567	A		Chr1	15186992	15192976	AT1TE49850	+	5984	B
	Chr1	13039449	13039584	AT1TE42560	-	135	A		Chr1	15194675	15196996	AT1TE49870	-	2321	B
	Chr1	13049862	13050128	AT1TE42600	+	267	A		Chr1	15202485	15204897	AT1TE49920	-	2412	B
	Chr1	13055502	13055567	AT1TE42615	-	65	A		Chr1	15209311	15215968	AT1TE49955	+	6657	B
	Chr1	13055567	13056271	AT1TE42620	-	704	A		Chr1	15215968	15220007	AT1TE49960	-	4039	B
	Chr1	13056980	13058485	AT1TE42630	+	1505	A		Chr1	15221985	15223943	AT1TE49990	-	1959	B
	Chr1	13065302	13065601	AT1TE42665	+	299	A		Chr1	15264865	15267189	AT1TE50250	-	2325	B
	Chr1	13067783	13068628	AT1TE42670	+	845	A		Chr1	15279017	15280077	AT1TE50305	-	1061	B
	Chr1	13069749	13070698	AT1TE42680	-	949	A		Chr1	15280449	15289511	AT1TE50315	+	9063	B
	Chr1	13075526	13076517	AT1TE42700	-	991	A		Chr1	15292160	15296694	AT1TE50345	+	4535	B
	Chr1	13087384	13088087	AT1TE42750	+	703	A		Chr1	15300274	15308042	AT1TE50375	+	7769	B
	Chr1	13097431	13098188	AT1TE42790	+	757	A		Chr1	15308540	15310254	AT1TE50385	-	1715	B
	Chr1	13098280	13102834	AT1TE42800	+	4554	A		Chr1	15313564	15316162	AT1TE50415	-	2599	B
	Chr1	13108840	13109040	AT1TE42825	+	200	A		Chr1	15318105	15319617	AT1TE50435	-	1512	B
	Chr1	13114226	13114833	AT1TE42835	-	607	A		Chr1	15361201	15367098	AT1TE50700	-	5898	B
	Chr1	13114834	13115375	AT1TE42840	-	541	A		Chr1	15363727	15365357	AT1TE50710	-	1631	B
	Chr1	13119392	13120283	AT1TE42850	-	891	A		Chr1	15376087	15378181	AT1TE50765	-	2095	B
	Chr1	13121472	13121558	AT1TE42860	+	87	A		Chr1	15378553	15387615	AT1TE50775	+	9063	B
	Chr1	13121565	13122033	AT1TE42865	-	468	A		Chr1	15389287	15398355	AT1TE50795	-	9068	B
	Chr1	13127112	13128014	AT1TE42875	-	902	A		Chr1	15390263	15394797	AT1TE50800	+	4535	B
	Chr1	13128071	13129685	AT1TE42880	+	1614	A		Chr1	15398356	15406124	AT1TE50810	+	7769	B
	Chr1	13149787	13150516	AT1TE42915	+	729	A		Chr1	15406648	15408336	AT1TE50830	-	1689	B
	Chr1	13150516	13151142	AT1TE42920	+	626	A		Chr1	15412723	15420826	AT1TE50860	+	8103	B
	Chr1	13151142	13151476	AT1TE42925	-	334	A		Chr1	15421858	15428011	AT1TE50890	-	6153	B
	Chr1	13151879	13152923	AT1TE42930	-	1044	A		Chr1	15422079	15423710	AT1TE50895	+	1631	B
	Chr1	13155541	13156291	AT1TE42935	+	750	A		Chr1	15424982	15426176	AT1TE50900	+	1194	B
	Chr1	13160255	13161425	AT1TE42945	-	1170	A		Chr1	15426176	15427796	AT1TE50905	-	1620	B
	Chr1	13164661	13165419	AT1TE42965	+	758	A		Chr1	15428469	15429555	AT1TE50915	-	1086	B
	Chr1	13166074	13167303	AT1TE42975	-	1229	A		Chr1	15438845	15440903	AT1TE50975	+	2058	B
	Chr1	13171300	13171359	AT1TE42985	+	59	A		Chr1	15441563	15443621	AT1TE50985	-	2058	B
	Chr1	13198032	13198946	AT1TE43070	-	914	A		Chr1	15444294	15444487	AT1TE50990	-	193	B
	Chr1	13199077	13199696	AT1TE43080	-	619	A		Chr1	15448968	15450627	AT1TE51005	-	1659	B
	Chr1	13199828	13201184	AT1TE43085	+	1356	A		Chr1	15450854	15454302	AT1TE51020	-	3448	B
	Chr1	13211945	13213580	AT1TE43145	+	1635	A		Chr1	15455170	15455487	AT1TE51035	+	317	B
	Chr1	13215104	13216190	AT1TE43170	+	1086	A		Chr1	15455487	15486506	AT1TE51040	+	31019	B
	Chr1	13219979	13220029	AT1TE43185	-	50	A		Chr1	15486510	15491848	AT1TE51045	-	5338	B
	Chr1	13230841	13230992	AT1TE43220	-	151	A		Chr1	15491849	15499762	AT1TE51050	+	7913	B
	Chr1	13291504	13291813	AT1TE43400	+	309	A		Chr1	15504894	15509412	AT1TE51070	-	4518	B
	Chr1	13292854	13295196	AT1TE43420	-	2342	A		Chr1	15509414	15512097	AT1TE51075	-	2683	B
	Chr1	13299133	13301583	AT1TE43445	-	2450	A		Chr1	15512097	15519432	AT1TE51080	-	7335	B
	Chr1	13312488	13312586	AT1TE43515	+	98	A		Chr1	15519450	15522308	AT1TE51085	-	2858	B
	Chr1	13313433	13314041	AT1TE43530	-	608	A		Chr1	15523591	15524050	AT1TE51090	+	459	B
	Chr1	13323939	13324230	AT1TE43580	+	291	A		Chr1	15524077	15525003	AT1TE51100	-	926	B
	Chr1	13342810	13343440	AT1TE43615	-	630	A		Chr1	15525405	15530074	AT1TE51105	+	4669	B
	Chr1	13345720	13347477	AT1TE43635	-	1757	A		Chr1	15530074	15533816	AT1TE51120	-	3742	B
	Chr1	13349385	13349779	AT1TE43645	-	394	A		Chr1	15530424	15532919	AT1TE51125	-	2495	B
	Chr1	13351817	13352148	AT1TE43655	+	331	A		Chr1	15533899	15534153	AT1TE51135	+	254	B
	Chr1	13355241	13355610	AT1TE43680	+	369	A		Chr1	15534155	15535457	AT1TE51140	+	1302	B
	Chr1	13355890	13357161	AT1TE43690	+	1271	A		Chr1	15535483	15536104	AT1TE51150	-	621	B
	Chr1	13357162	13357312	AT1TE43695	-	151	A		Chr1	15536119	15546208	AT1TE51155	-	10089	B
	Chr1	13388503	13389976	AT1TE43775	+	1473	A		Chr1	15546209	15546471	AT1TE51160	+	262	B
	Chr1	13407452	13409316	AT1TE43845	+	1864	A		Chr1	15546603	15547274	AT1TE51170	+	671	B
	Chr1	13431628	13431826	AT1TE43920	+	198	A		Chr1	15547274	15549791	AT1TE51175	+	2517	B
	Chr1	13449263	13450021	AT1TE43985	-	758	A		Chr1	15548453	15548782	AT1TE51180	+	329	B
	Chr1	13449462	13449759	AT1TE43990	-	297	A		Chr1	15549795	15550663	AT1TE51185	+	868	B
	Chr1	13460982	13461897	AT1TE44045	+	915	A		Chr1	15550663	15554136	AT1TE51190	-	3473	B
	Chr1	13461897	13462182	AT1TE44050	+	285	A		Chr1	15554229	15554880	AT1TE51200	-	651	B
	Chr1	13464542	13465904	AT1TE44055	-	1362	A		Chr1	15555163	15557533	AT1TE51210	-	2370	B
	Chr1	13465904	13466750	AT1TE44060	+	846	A		Chr1	15557533	15559659	AT1TE51215	-	2126	B
	Chr1	13473687	13474500	AT1TE44085	-	813	A		Chr1	15559746	15560396	AT1TE51225	-	650	B
	Chr1	13479193	13480165	AT1TE44115	-	972	A		Chr1	15560396	15560684	AT1TE51230	-	288	B
	Chr1	13495370	13496086	AT1TE44155	-	716	A		Chr1	15560684	15569184	AT1TE51235	-	8500	B
	Chr1	13503766	13504265	AT1TE44200	-	499	A		Chr1	15561951	15562038	AT1TE51240	+	87	B
	Chr1	13524125	13524980	AT1TE44260	-	855	A		Chr1	15562038	15567091	AT1TE51245	+	5053	B
	Chr1	13548170	13548238	AT1TE44340	+	68	A		Chr1	15569184	15569643	AT1TE51250	-	459	B
	Chr1	13565365	13566361	AT1TE44385	+	996	A		Chr1	15569643	15570478	AT1TE51255	+	835	B
	Chr1	13566471	13568163	AT1TE44395	-	1692	A		Chr1	15570478	15581789	AT1TE51260	+	11311	B
	Chr1	13568163	13568218	AT1TE44400	+	55	A		Chr1	15572379	15580018	AT1TE51265	+	7639	B
	Chr1	13569972	13570034	AT1TE44410	-	62	A		Chr1	15581789	15582052	AT1TE51270	+	263	B
	Chr1	13581894	13582929	AT1TE44470	+	1035	A		Chr1	15582062	15585032	AT1TE51275	-	2970	B
	Chr1	13584483	13585600	AT1TE44485	+	1117	A		Chr1	15585147	15586797	AT1TE51285	+	1650	B
	Chr1	13585936	13586834	AT1TE44490	-	898	A		Chr1	15588987	15590261	AT1TE51295	+	1274	B
	Chr1	13591766	13591828	AT1TE44505	-	62	A		Chr1	15590406	15594101	AT1TE51305	+	3695	B
	Chr1	13649001	13649326	AT1TE44675	-	325	A		Chr1	15594101	15594925	AT1TE51310	+	824	B
	Chr1	13650501	13654369	AT1TE44690	-	3868	A		Chr1	15594925	15598833	AT1TE51315	+	3908	B
	Chr1	13654645	13655611	AT1TE44705	-	966	A		Chr1	15596130	15596723	AT1TE51320	+	593	B
	Chr1	13668180	13669232	AT1TE44730	+	1052	A		Chr1	15610517	15610626	AT1TE51355	-	109	B
	Chr1	13682261	13682800	AT1TE44775	+	539	A		Chr1	15610626	15615403	AT1TE51360	-	4777	B
	Chr1	13684549	13684676	AT1TE44780	-	127	A		Chr1	15616245	15618055	AT1TE51370	-	1810	B
	Chr1	13686650	13687570	AT1TE44795	+	920	A		Chr1	15618170	15622851	AT1TE51385	-	4681	B
	Chr1	13687570	13687739	AT1TE44800	+	169	A		Chr1	15624480	15625637	AT1TE51405	+	1157	B
	Chr1	13707423	13708135	AT1TE44890	-	712	A		Chr1	15626584	15627240	AT1TE51415	+	656	B
	Chr1	13711058	13712501	AT1TE44905	+	1443	A		Chr1	15627367	15629085	AT1TE51420	+	1718	B
	Chr1	13748186	13748454	AT1TE45050	-	268	A		Chr1	15629085	15629702	AT1TE51425	+	617	B
	Chr1	13784780	13785497	AT1TE45165	-	717	A		Chr1	15630492	15630985	AT1TE51430	-	493	B
	Chr1	13796498	13800080	AT1TE45200	-	3582	A		Chr1	15630985	15632195	AT1TE51435	+	1210	B
	Chr1	13807787	13809671	AT1TE45240	-	1884	A		Chr1	15633596	15633658	AT1TE51450	-	62	B
	Chr1	13810903	13811477	AT1TE45265	-	574	A		Chr1	15634351	15634377	AT1TE51455	-	26	B
	Chr1	13811962	13812763	AT1TE45280	+	801	A		Chr1	15634434	15636526	AT1TE51465	-	2092	B
	Chr1	13837842	13838008	AT1TE45370	-	166	A		Chr1	15636762	15639274	AT1TE51475	+	2512	B
	Chr1	13896254	13896396	AT1TE45585	+	142	A		Chr1	15639274	15639886	AT1TE51480	+	612	B
	Chr1	13904683	13905141	AT1TE45630	+	458	A		Chr1	15639888	15641103	AT1TE51485	+	1215	B
	Chr1	13931179	13931785	AT1TE45745	+	606	A		Chr1	15643950	15645170	AT1TE51525	+	1220	B
	Chr1	13937238	13937843	AT1TE45775	+	606	A		Chr1	15645307	15645608	AT1TE51535	-	301	B
	Chr1	13955653	13959379	AT1TE45805	+	3726	A		Chr1	15646120	15647086	AT1TE51545	-	966	B
	Chr1	13966452	13967701	AT1TE45845	-	1249	A		Chr1	15647288	15649158	AT1TE51555	+	1870	B
	Chr1	14009712	14010075	AT1TE46025	-	363	A		Chr1	15649182	15649875	AT1TE51560	-	693	B
	Chr1	14011339	14014304	AT1TE46030	-	2965	A		Chr1	15654342	15656208	AT1TE51570	-	1866	B
	Chr1	14031013	14032112	AT1TE46085	+	1099	A		Chr1	15657481	15661620	AT1TE51580	+	4139	B
	Chr1	14032113	14032437	AT1TE46090	-	325	A		Chr1	15662678	15663195	AT1TE51600	+	517	B
	Chr1	14146256	14147510	AT1TE46455	-	1254	A		Chr1	15665055	15674411	AT1TE51615	+	9356	B
	Chr1	14151221	14151753	AT1TE46475	-	532	A		Chr1	15674664	15675483	AT1TE51635	+	819	B
	Chr1	14152940	14153264	AT1TE46485	+	325	A		Chr1	15676216	15683600	AT1TE51645	-	7384	B
	Chr1	14153456	14154863	AT1TE46490	+	1407	A		Chr1	15677553	15680600	AT1TE51650	+	3047	B
	Chr1	14169505	14169611	AT1TE46545	+	106	A		Chr1	15685431	15687581	AT1TE51665	+	2150	B
	Chr1	14225656	14226700	AT1TE46680	+	1044	A		Chr1	15687581	15687713	AT1TE51670	+	132	B
	Chr1	14261587	14262179	AT1TE46790	-	592	A		Chr1	15690798	15692926	AT1TE51685	+	2128	B
	Chr1	14282908	14283310	AT1TE46850	-	402	A		Chr1	15692926	15697905	AT1TE51690	+	4979	B
	Chr1	14286479	14286705	AT1TE46865	-	226	A		Chr1	15698425	15701729	AT1TE51700	+	3304	B
	Chr1	14287803	14288391	AT1TE46880	+	588	A		Chr1	15703959	15715037	AT1TE51735	-	11078	B
	Chr1	14296179	14296518	AT1TE46915	-	339	A		Chr1	15717179	15719722	AT1TE51745	+	2543	B
	Chr1	14298031	14298666	AT1TE46940	+	635	A		Chr1	15719722	15720075	AT1TE51750	+	353	B
	Chr1	14298785	14300271	AT1TE46950	-	1486	A		Chr1	15721726	15724634	AT1TE51765	+	2908	B
	Chr1	14307039	14307208	AT1TE46995	-	169	A		Chr1	15725601	15727426	AT1TE51775	+	1825	B
	Chr1	14340694	14341290	AT1TE47110	+	597	A		Chr1	15727767	15729042	AT1TE51780	+	1275	B
	Chr1	14345242	14346432	AT1TE47135	+	1191	A		Chr1	15731703	15731875	AT1TE51805	+	172	B
	Chr1	14383838	14384611	AT1TE47325	+	774	A		Chr1	15733069	15745010	AT1TE51820	+	11941	B
	Chr1	14390895	14392085	AT1TE47355	+	1191	A		Chr1	15735668	15738170	AT1TE51825	-	2502	B
	Chr1	14449178	14451469	AT1TE47570	+	2291	A		Chr1	15738170	15742393	AT1TE51830	-	4223	B
	Chr1	14457777	14459459	AT1TE47595	+	1682	A		Chr1	15745010	15746461	AT1TE51835	+	1451	B
	Chr1	14488372	14489795	AT1TE47725	-	1423	A		Chr1	15746461	15747109	AT1TE51840	+	648	B
	Chr1	14489796	14491652	AT1TE47730	+	1856	A		Chr1	15748098	15750261	AT1TE51845	+	2163	B
	Chr1	14491670	14492096	AT1TE47735	-	426	A		Chr1	15750263	15755704	AT1TE51850	+	5441	B
	Chr1	14492882	14493182	AT1TE47740	+	300	A		Chr1	15755704	15757547	AT1TE51855	+	1843	B
	Chr1	14493182	14493851	AT1TE47745	+	669	A		Chr1	15758846	15759249	AT1TE51870	-	403	B
	Chr1	14493851	14498848	AT1TE47750	+	4997	A		Chr1	15760243	15761056	AT1TE51880	+	813	B
	Chr1	14499493	14502836	AT1TE47765	+	3343	A		Chr1	15760711	15760984	AT1TE51885	+	273	B
	Chr1	14503023	14504548	AT1TE47775	+	1525	A		Chr1	15761331	15762254	AT1TE51900	-	923	B
	Chr1	14847385	14847791	AT1TE48740	-	407	A		Chr1	15762274	15762925	AT1TE51905	-	651	B
	Chr1	14875009	14875415	AT1TE48770	+	407	A		Chr1	15766555	15767338	AT1TE51945	-	783	B
	Chr1	14998918	14999727	AT1TE49140	-	809	A		Chr1	15767338	15768468	AT1TE51950	-	1130	B
	Chr1	15087873	15089939	AT1TE49370	-	2066	A		Chr1	15768496	15770736	AT1TE51960	-	2240	B
	Chr1	15118726	15122535	AT1TE49540	-	3809	A		Chr1	15770763	15771086	AT1TE51965	+	323	B
	Chr1	15138834	15139067	AT1TE49670	+	233	A		Chr1	15771086	15772102	AT1TE51970	-	1016	B
	Chr1	15240538	15244617	AT1TE50115	+	4080	A		Chr1	15772545	15772974	AT1TE51980	+	429	B
	Chr1	15337657	15341736	AT1TE50560	+	4080	A		Chr1	15772984	15790136	AT1TE51985	+	17152	B
	Chr1	15419174	15420289	AT1TE50875	+	1115	A		Chr1	15784487	15786430	AT1TE51990	-	1943	B
	Chr1	15444491	15444814	AT1TE50995	+	323	A		Chr1	15790136	15791906	AT1TE52000	-	1770	B
	Chr1	15445238	15448968	AT1TE51000	-	3730	A		Chr1	15791916	15792668	AT1TE52005	+	752	B
	Chr1	15450628	15450822	AT1TE51010	-	195	A		Chr1	15792668	15794826	AT1TE52010	-	2158	B
	Chr1	15499762	15500387	AT1TE51055	+	625	A		Chr1	15794826	15795675	AT1TE52015	-	849	B
	Chr1	15500422	15504894	AT1TE51065	+	4472	A		Chr1	15795675	15799513	AT1TE52020	+	3838	B
	Chr1	15533860	15533899	AT1TE51130	+	39	A		Chr1	15799513	15807462	AT1TE52025	+	7949	B
	Chr1	15641319	15641930	AT1TE51490	-	611	A		Chr1	15810041	15811238	AT1TE52050	-	1197	B
	Chr1	15642413	15643368	AT1TE51515	+	955	A		Chr1	15811238	15813218	AT1TE52055	+	1980	B
	Chr1	15644538	15644761	AT1TE51530	+	223	A		Chr1	15815568	15816220	AT1TE52075	+	652	B
	Chr1	15645800	15646015	AT1TE51540	-	215	A		Chr1	15816321	15821314	AT1TE52085	-	4993	B
	Chr1	15662504	15663325	AT1TE51595	+	821	A		Chr1	15816972	15818102	AT1TE52090	+	1130	B
	Chr1	15687715	15689270	AT1TE51675	-	1555	A		Chr1	15819545	15821124	AT1TE52095	+	1579	B
	Chr1	15729564	15729926	AT1TE51785	+	362	A		Chr1	15821412	15847509	AT1TE52105	-	26097	B
	Chr1	15729596	15729828	AT1TE51790	-	232	A		Chr1	15822575	15826633	AT1TE52110	-	4058	B
	Chr1	15762943	15766494	AT1TE51910	-	3551	A		Chr1	15826666	15827286	AT1TE52120	-	620	B
	Chr1	15763344	15763527	AT1TE51915	+	183	A		Chr1	15827286	15838845	AT1TE52125	-	11559	B
	Chr1	15765738	15765907	AT1TE51930	+	169	A		Chr1	15847509	15852729	AT1TE52160	-	5220	B
	Chr1	15838878	15839498	AT1TE52135	-	620	A		Chr1	15852729	15855572	AT1TE52170	-	2843	B
	Chr1	15856511	15856539	AT1TE52185	-	28	A		Chr1	15852915	15854122	AT1TE52175	+	1207	B
	Chr1	15856539	15857196	AT1TE52190	-	657	A		Chr1	15857270	15872649	AT1TE52200	+	15379	B
	Chr1	15879390	15882768	AT1TE52240	+	3378	A		Chr1	15867720	15871376	AT1TE52205	+	3656	B
	Chr1	15880736	15880940	AT1TE52255	+	204	A		Chr1	15871658	15872288	AT1TE52210	+	630	B
	Chr1	15886308	15887099	AT1TE52280	+	791	A		Chr1	15872971	15879297	AT1TE52220	+	6326	B
	Chr1	15890199	15891183	AT1TE52310	+	984	A		Chr1	15905243	15906048	AT1TE52360	-	805	B
	Chr1	15890691	15890925	AT1TE52320	+	234	A		Chr1	15906048	15906574	AT1TE52365	+	526	B
	Chr1	15901345	15904093	AT1TE52350	-	2748	A		Chr1	15909053	15909855	AT1TE52385	+	802	B
	Chr1	15908954	15909053	AT1TE52380	+	99	A		Chr1	15910385	15911110	AT1TE52400	+	725	B
	Chr1	15935439	15935710	AT1TE52520	+	271	A		Chr1	15911534	15917462	AT1TE52420	+	5928	B
	Chr1	15939234	15939329	AT1TE52530	-	95	A		Chr1	15919707	15919927	AT1TE52450	-	220	B
	Chr1	15939329	15941469	AT1TE52535	+	2140	A		Chr1	15944858	15945882	AT1TE52550	-	1024	B
	Chr1	15941484	15942102	AT1TE52540	-	618	A		Chr1	15950603	15958318	AT1TE52590	-	7715	B
	Chr1	15980797	15980948	AT1TE52675	-	151	A		Chr1	15958806	15959344	AT1TE52595	-	538	B
	Chr1	16109971	16110287	AT1TE53035	-	316	A		Chr1	15959794	15959908	AT1TE52600	+	114	B
	Chr1	16116468	16116752	AT1TE53080	+	284	A		Chr1	15959910	15961579	AT1TE52605	+	1669	B
	Chr1	16116886	16117223	AT1TE53085	-	337	A		Chr1	15961579	15965042	AT1TE52610	+	3463	B
	Chr1	16122859	16124077	AT1TE53095	+	1218	A		Chr1	15965042	15966249	AT1TE52615	+	1207	B
	Chr1	16124619	16124702	AT1TE53100	-	83	A		Chr1	15968718	15970140	AT1TE52620	-	1422	B
	Chr1	16124702	16125144	AT1TE53105	-	442	A		Chr1	15969162	15969241	AT1TE52625	-	79	B
	Chr1	16139486	16140471	AT1TE53150	+	985	A		Chr1	15970140	15970583	AT1TE52630	-	443	B
	Chr1	16142530	16142707	AT1TE53160	+	178	A		Chr1	15971400	15972067	AT1TE52640	-	667	B
	Chr1	16143284	16143370	AT1TE53165	+	86	A		Chr1	15987259	15988791	AT1TE52700	+	1532	B
	Chr1	16143370	16145661	AT1TE53170	-	2291	A		Chr1	15991342	15991480	AT1TE52710	-	138	B
	Chr1	16147583	16147693	AT1TE53190	+	110	A		Chr1	15991519	15992798	AT1TE52715	-	1279	B
	Chr1	16147917	16148400	AT1TE53195	-	483	A		Chr1	15997136	16000277	AT1TE52735	-	3141	B
	Chr1	16156711	16156864	AT1TE53230	+	153	A		Chr1	16000934	16003031	AT1TE52740	-	2097	B
	Chr1	16161553	16162042	AT1TE53260	+	489	A		Chr1	16003505	16004974	AT1TE52745	-	1469	B
	Chr1	16162424	16164556	AT1TE53265	+	2132	A		Chr1	16004974	16005339	AT1TE52750	-	365	B
	Chr1	16231805	16232128	AT1TE53450	+	323	A		Chr1	16006206	16006536	AT1TE52760	+	330	B
	Chr1	16252754	16254035	AT1TE53510	+	1281	A		Chr1	16007082	16008873	AT1TE52765	+	1791	B
	Chr1	16258425	16259815	AT1TE53540	-	1390	A		Chr1	16008873	16009048	AT1TE52770	+	175	B
	Chr1	16259818	16260357	AT1TE53545	+	539	A		Chr1	16009303	16009976	AT1TE52775	-	673	B
	Chr1	16261097	16262552	AT1TE53560	+	1455	A		Chr1	16009976	16011635	AT1TE52780	-	1659	B
	Chr1	16278736	16279379	AT1TE53615	+	643	A		Chr1	16012584	16019699	AT1TE52795	-	7115	B
	Chr1	16291842	16292255	AT1TE53645	+	413	A		Chr1	16020945	16021150	AT1TE52805	-	205	B
	Chr1	16292255	16294190	AT1TE53650	+	1935	A		Chr1	16023127	16024273	AT1TE52810	+	1146	B
	Chr1	16294195	16294480	AT1TE53655	-	286	A		Chr1	16025306	16025576	AT1TE52815	+	270	B
	Chr1	16303515	16305190	AT1TE53665	+	1675	A		Chr1	16025576	16025599	AT1TE52820	-	23	B
	Chr1	16305251	16305480	AT1TE53675	-	230	A		Chr1	16028574	16029038	AT1TE52825	+	464	B
	Chr1	16306749	16306850	AT1TE53680	-	101	A		Chr1	16031000	16032234	AT1TE52830	+	1234	B
	Chr1	16307723	16307795	AT1TE53700	-	72	A		Chr1	16034405	16034719	AT1TE52835	+	314	B
	Chr1	16317381	16317875	AT1TE53720	+	494	A		Chr1	16034987	16037031	AT1TE52845	+	2044	B
	Chr1	16325183	16327367	AT1TE53750	-	2184	A		Chr1	16038518	16038907	AT1TE52855	+	389	B
	Chr1	16327367	16327474	AT1TE53755	-	107	A		Chr1	16038907	16045334	AT1TE52860	+	6427	B
	Chr1	16329001	16329246	AT1TE53760	-	245	A		Chr1	16045334	16049209	AT1TE52865	+	3875	B
	Chr1	16339904	16340119	AT1TE53775	+	215	A		Chr1	16049209	16051714	AT1TE52870	+	2505	B
	Chr1	16369970	16375017	AT1TE53970	-	5047	A		Chr1	16053085	16053714	AT1TE52875	-	629	B
	Chr1	16377779	16378958	AT1TE53985	-	1179	A		Chr1	16054520	16055754	AT1TE52880	+	1234	B
	Chr1	16399978	16401001	AT1TE54020	-	1023	A		Chr1	16055754	16058562	AT1TE52885	-	2808	B
	Chr1	16403602	16403859	AT1TE54035	+	257	A		Chr1	16058835	16059164	AT1TE52890	-	329	B
	Chr1	16414129	16414869	AT1TE54100	+	740	A		Chr1	16059164	16061322	AT1TE52895	+	2158	B
	Chr1	16422981	16423164	AT1TE54130	-	183	A		Chr1	16062269	16064336	AT1TE52900	-	2067	B
	Chr1	16423164	16423514	AT1TE54135	-	350	A		Chr1	16067594	16068439	AT1TE52910	-	845	B
	Chr1	16430417	16430658	AT1TE54160	-	241	A		Chr1	16069347	16070136	AT1TE52920	+	789	B
	Chr1	16431064	16431612	AT1TE54165	-	548	A		Chr1	16070136	16074320	AT1TE52925	+	4184	B
	Chr1	16432028	16432092	AT1TE54170	-	64	A		Chr1	16078726	16079631	AT1TE52940	-	905	B
	Chr1	16438987	16439188	AT1TE54200	+	201	A		Chr1	16080533	16089067	AT1TE52950	+	8534	B
	Chr1	16449025	16449303	AT1TE54230	+	279	A		Chr1	16089101	16089995	AT1TE52960	+	894	B
	Chr1	16456703	16456891	AT1TE54265	-	188	A		Chr1	16090523	16093188	AT1TE52970	-	2665	B
	Chr1	16457323	16457618	AT1TE54270	-	295	A		Chr1	16093188	16093881	AT1TE52975	-	693	B
	Chr1	16457618	16457784	AT1TE54275	-	166	A		Chr1	16094141	16097900	AT1TE52985	-	3759	B
	Chr1	16462600	16463520	AT1TE54310	+	920	A		Chr1	16097900	16099192	AT1TE52990	-	1292	B
	Chr1	16467477	16467772	AT1TE54320	+	295	A		Chr1	16099668	16104812	AT1TE53000	-	5144	B
	Chr1	16474621	16475037	AT1TE54340	-	416	A		Chr1	16105379	16106224	AT1TE53025	-	845	B
	Chr1	16475348	16476987	AT1TE54350	-	1639	A		Chr1	16106230	16109971	AT1TE53030	-	3741	B
	Chr1	16477163	16477700	AT1TE54365	+	537	A		Chr1	16110310	16110655	AT1TE53045	+	345	B
	Chr1	16477700	16478045	AT1TE54370	+	345	A		Chr1	16110655	16112323	AT1TE53050	+	1668	B
	Chr1	16482958	16483451	AT1TE54385	-	493	A		Chr1	16113422	16114784	AT1TE53065	+	1362	B
	Chr1	16492933	16493332	AT1TE54405	+	399	A		Chr1	16117828	16122859	AT1TE53090	+	5031	B
	Chr1	16544395	16545449	AT1TE54550	-	1054	A		Chr1	16146123	16146419	AT1TE53180	+	296	B
	Chr1	16546946	16548026	AT1TE54560	-	1080	A		Chr1	16146853	16147149	AT1TE53185	+	296	B
	Chr1	16548026	16548070	AT1TE54565	-	44	A		Chr1	16148809	16149828	AT1TE53215	-	1019	B
	Chr1	16561040	16562084	AT1TE54605	-	1044	A		Chr1	16158304	16161451	AT1TE53250	-	3147	B
	Chr1	16564147	16564523	AT1TE54610	-	376	A		Chr1	16164704	16165296	AT1TE53275	-	592	B
	Chr1	16569872	16575243	AT1TE54625	-	5371	A		Chr1	16164856	16165118	AT1TE53280	-	262	B
	Chr1	16624533	16625815	AT1TE54795	-	1282	A		Chr1	16167802	16167957	AT1TE53285	+	155	B
	Chr1	16637234	16637250	AT1TE54810	-	16	A		Chr1	16168193	16170418	AT1TE53300	-	2225	B
	Chr1	16650059	16650725	AT1TE54880	-	666	A		Chr1	16170418	16171419	AT1TE53305	+	1001	B
	Chr1	16650890	16651487	AT1TE54885	-	597	A		Chr1	16171439	16172202	AT1TE53310	-	763	B
	Chr1	16658268	16658518	AT1TE54915	+	250	A		Chr1	16174270	16174793	AT1TE53315	+	523	B
	Chr1	16667242	16667899	AT1TE54940	+	657	A		Chr1	16176731	16177990	AT1TE53320	+	1259	B
	Chr1	16689706	16690109	AT1TE55040	-	403	A		Chr1	16177990	16178223	AT1TE53325	+	233	B
	Chr1	16690109	16690131	AT1TE55045	-	22	A		Chr1	16178488	16181520	AT1TE53330	+	3032	B
	Chr1	16699068	16699412	AT1TE55095	+	344	A		Chr1	16182567	16185822	AT1TE53350	+	3255	B
	Chr1	16699412	16701967	AT1TE55100	+	2555	A		Chr1	16188965	16191015	AT1TE53370	+	2050	B
	Chr1	16701009	16701424	AT1TE55105	+	415	A		Chr1	16191015	16193353	AT1TE53375	+	2338	B
	Chr1	16702565	16702962	AT1TE55115	-	397	A		Chr1	16194406	16194665	AT1TE53385	+	259	B
	Chr1	16705921	16706785	AT1TE55135	-	865	A		Chr1	16194665	16198716	AT1TE53390	+	4051	B
	Chr1	16707212	16707792	AT1TE55145	+	580	A		Chr1	16198716	16203798	AT1TE53395	+	5082	B
	Chr1	16709856	16710251	AT1TE55155	+	395	A		Chr1	16209059	16209861	AT1TE53405	+	802	B
	Chr1	16710252	16710275	AT1TE55160	+	24	A		Chr1	16211533	16213841	AT1TE53415	+	2308	B
	Chr1	16710326	16710417	AT1TE55170	+	91	A		Chr1	16240476	16244557	AT1TE53470	+	4081	B
	Chr1	16710417	16710550	AT1TE55175	-	133	A		Chr1	16246204	16246418	AT1TE53475	+	214	B
	Chr1	16711508	16712044	AT1TE55190	+	536	A		Chr1	16246633	16247183	AT1TE53480	+	550	B
	Chr1	16712140	16713041	AT1TE55200	+	901	A		Chr1	16247188	16247528	AT1TE53485	-	340	B
	Chr1	16719531	16720312	AT1TE55230	+	781	A		Chr1	16247528	16247707	AT1TE53490	+	179	B
	Chr1	16721684	16724136	AT1TE55255	-	2452	A		Chr1	16248689	16249108	AT1TE53495	-	419	B
	Chr1	16737734	16738517	AT1TE55305	-	783	A		Chr1	16249784	16250104	AT1TE53500	-	320	B
	Chr1	16742010	16742303	AT1TE55315	+	293	A		Chr1	16256749	16257997	AT1TE53530	-	1248	B
	Chr1	16754572	16755211	AT1TE55360	+	639	A		Chr1	16274653	16275219	AT1TE53600	-	566	B
	Chr1	16769733	16770051	AT1TE55415	-	318	A		Chr1	16279742	16280141	AT1TE53625	-	399	B
	Chr1	16773498	16773744	AT1TE55425	+	247	A		Chr1	16281486	16291044	AT1TE53635	-	9558	B
	Chr1	16774292	16774469	AT1TE55435	+	177	A		Chr1	16296280	16302985	AT1TE53660	-	6705	B
	Chr1	16777874	16779338	AT1TE55450	-	1464	A		Chr1	16311523	16316838	AT1TE53710	+	5315	B
	Chr1	16779430	16779507	AT1TE55460	+	77	A		Chr1	16321606	16324358	AT1TE53735	+	2752	B
	Chr1	16789887	16790639	AT1TE55500	-	752	A		Chr1	16329246	16339556	AT1TE53765	+	10310	B
	Chr1	16790639	16790674	AT1TE55505	-	35	A		Chr1	16340646	16340675	AT1TE53780	+	30	B
	Chr1	16792056	16792439	AT1TE55530	-	383	A		Chr1	16340675	16340750	AT1TE53785	-	75	B
	Chr1	16792440	16792495	AT1TE55535	+	55	A		Chr1	16340750	16341752	AT1TE53790	-	1002	B
	Chr1	16793591	16794406	AT1TE55540	+	815	A		Chr1	16342373	16342454	AT1TE53805	-	82	B
	Chr1	16801969	16802106	AT1TE55560	+	137	A		Chr1	16342553	16347999	AT1TE53815	-	5446	B
	Chr1	16802106	16802289	AT1TE55565	-	183	A		Chr1	16343030	16343289	AT1TE53820	-	259	B
	Chr1	16802704	16805441	AT1TE55575	+	2737	A		Chr1	16343289	16346824	AT1TE53825	+	3535	B
	Chr1	16806150	16807920	AT1TE55590	+	1770	A		Chr1	16347999	16348019	AT1TE53830	-	20	B
	Chr1	16818868	16820877	AT1TE55630	-	2009	A		Chr1	16348075	16348538	AT1TE53840	-	463	B
	Chr1	16822305	16822848	AT1TE55645	+	543	A		Chr1	16348626	16348770	AT1TE53850	-	144	B
	Chr1	16824109	16827463	AT1TE55670	+	3354	A		Chr1	16348820	16350377	AT1TE53860	-	1557	B
	Chr1	16827473	16828789	AT1TE55675	-	1316	A		Chr1	16350417	16351085	AT1TE53870	+	668	B
	Chr1	16840608	16841432	AT1TE55730	-	824	A		Chr1	16351231	16351330	AT1TE53875	+	99	B
	Chr1	16841498	16841793	AT1TE55740	+	295	A		Chr1	16351340	16351942	AT1TE53880	-	602	B
	Chr1	16841984	16842553	AT1TE55750	-	569	A		Chr1	16351945	16352111	AT1TE53885	+	166	B
	Chr1	16842063	16842439	AT1TE55755	-	376	A		Chr1	16352972	16353121	AT1TE53890	+	149	B
	Chr1	16842836	16844613	AT1TE55765	-	1777	A		Chr1	16353421	16354538	AT1TE53895	+	1117	B
	Chr1	16846506	16846715	AT1TE55770	-	209	A		Chr1	16354538	16355020	AT1TE53900	-	482	B
	Chr1	16858518	16859160	AT1TE55805	-	642	A		Chr1	16360020	16361175	AT1TE53915	-	1155	B
	Chr1	16859160	16860639	AT1TE55810	-	1479	A		Chr1	16361175	16361214	AT1TE53920	+	39	B
	Chr1	16860639	16860666	AT1TE55815	+	27	A		Chr1	16361220	16363108	AT1TE53925	+	1888	B
	Chr1	16860666	16860739	AT1TE55820	-	73	A		Chr1	16363115	16364036	AT1TE53930	-	921	B
	Chr1	16861343	16861615	AT1TE55830	+	272	A		Chr1	16364036	16364385	AT1TE53935	+	349	B
	Chr1	16863455	16865121	AT1TE55845	+	1666	A		Chr1	16364385	16364607	AT1TE53940	+	222	B
	Chr1	16866614	16867298	AT1TE55850	-	684	A		Chr1	16364727	16365032	AT1TE53945	-	305	B
	Chr1	16867761	16868961	AT1TE55855	+	1200	A		Chr1	16368184	16368540	AT1TE53955	+	356	B
	Chr1	16877044	16877543	AT1TE55880	-	499	A		Chr1	16368540	16369914	AT1TE53960	+	1374	B
	Chr1	16877826	16877907	AT1TE55885	+	81	A		Chr1	16375017	16379642	AT1TE53975	+	4625	B
	Chr1	16877907	16879338	AT1TE55890	-	1431	A		Chr1	16380110	16387683	AT1TE53995	-	7573	B
	Chr1	16879338	16879926	AT1TE55895	+	588	A		Chr1	16389849	16392463	AT1TE54000	+	2614	B
	Chr1	16879454	16879693	AT1TE55900	+	239	A		Chr1	16392787	16397819	AT1TE54005	-	5032	B
	Chr1	16882184	16882942	AT1TE55910	-	758	A		Chr1	16393997	16394353	AT1TE54010	+	356	B
	Chr1	16884465	16884909	AT1TE55915	-	444	A		Chr1	16396139	16396969	AT1TE54015	+	830	B
	Chr1	16885822	16887029	AT1TE55920	-	1207	A		Chr1	16405733	16406476	AT1TE54060	-	743	B
	Chr1	16889133	16890972	AT1TE55925	-	1839	A		Chr1	16406731	16407941	AT1TE54075	-	1210	B
	Chr1	16923014	16923274	AT1TE56030	+	260	A		Chr1	16418839	16420085	AT1TE54110	-	1246	B
	Chr1	16929969	16930548	AT1TE56055	-	579	A		Chr1	16420401	16420783	AT1TE54115	+	382	B
	Chr1	16935740	16936348	AT1TE56090	-	608	A		Chr1	16421132	16424144	AT1TE54120	-	3012	B
	Chr1	16936778	16936968	AT1TE56100	-	190	A		Chr1	16422436	16422474	AT1TE54125	-	38	B
	Chr1	16937847	16938113	AT1TE56105	-	266	A		Chr1	16449870	16451234	AT1TE54235	+	1364	B
	Chr1	16938113	16939142	AT1TE56110	-	1029	A		Chr1	16451657	16452658	AT1TE54245	+	1001	B
	Chr1	16939241	16939447	AT1TE56120	+	206	A		Chr1	16453796	16455250	AT1TE54250	-	1454	B
	Chr1	16942637	16942821	AT1TE56130	-	184	A		Chr1	16455250	16455556	AT1TE54255	-	306	B
	Chr1	16965618	16968377	AT1TE56170	-	2759	A		Chr1	16459956	16460135	AT1TE54290	-	179	B
	Chr1	16969363	16969724	AT1TE56185	-	361	A		Chr1	16488880	16491738	AT1TE54400	-	2858	B
	Chr1	16974797	16975428	AT1TE56205	+	631	A		Chr1	16496911	16497372	AT1TE54420	+	461	B
	Chr1	16987141	16987347	AT1TE56250	-	206	A		Chr1	16500125	16500851	AT1TE54430	-	726	B
	Chr1	16987615	16990441	AT1TE56255	+	2826	A		Chr1	16500851	16501097	AT1TE54435	-	246	B
	Chr1	16987715	16989955	AT1TE56260	+	2240	A		Chr1	16501403	16502940	AT1TE54440	+	1537	B
	Chr1	16997265	16999391	AT1TE56300	-	2126	A		Chr1	16501576	16502669	AT1TE54445	-	1093	B
	Chr1	17011768	17012077	AT1TE56345	+	309	A		Chr1	16504653	16505537	AT1TE54450	+	884	B
	Chr1	17015808	17015857	AT1TE56355	+	49	A		Chr1	16505599	16506274	AT1TE54455	+	675	B
	Chr1	17021908	17021987	AT1TE56375	+	79	A		Chr1	16509062	16509235	AT1TE54470	-	173	B
	Chr1	17023248	17023915	AT1TE56385	-	667	A		Chr1	16509814	16528903	AT1TE54480	-	19089	B
	Chr1	17054925	17060041	AT1TE56445	+	5116	A		Chr1	16531299	16531668	AT1TE54485	+	369	B
	Chr1	17069722	17070185	AT1TE56495	-	463	A		Chr1	16531734	16531788	AT1TE54495	+	54	B
	Chr1	17069791	17070028	AT1TE56500	-	238	A		Chr1	16531788	16533312	AT1TE54500	+	1524	B
	Chr1	17071351	17074489	AT1TE56505	-	3138	A		Chr1	16533987	16534475	AT1TE54515	-	488	B
	Chr1	17076897	17077303	AT1TE56515	-	406	A		Chr1	16551715	16557069	AT1TE54585	-	5354	B
	Chr1	17082964	17083160	AT1TE56530	-	197	A		Chr1	16557069	16557858	AT1TE54590	+	789	B
	Chr1	17094314	17095350	AT1TE56565	+	1037	A		Chr1	16557972	16558890	AT1TE54600	+	918	B
	Chr1	17107371	17111523	AT1TE56620	+	4152	A		Chr1	16581795	16581942	AT1TE54640	+	147	B
	Chr1	17111564	17111638	AT1TE56630	-	74	A		Chr1	16582724	16583222	AT1TE54645	+	498	B
	Chr1	17112391	17112445	AT1TE56635	-	55	A		Chr1	16584100	16586369	AT1TE54655	+	2269	B
	Chr1	17112446	17115304	AT1TE56640	-	2859	A		Chr1	16586369	16586476	AT1TE54660	+	107	B
	Chr1	17122260	17122323	AT1TE56680	+	63	A		Chr1	16586476	16589501	AT1TE54665	+	3025	B
	Chr1	17136381	17136946	AT1TE56735	-	565	A		Chr1	16589501	16592562	AT1TE54670	-	3061	B
	Chr1	17139893	17141150	AT1TE56765	-	1257	A		Chr1	16592562	16593740	AT1TE54675	-	1178	B
	Chr1	17141639	17142928	AT1TE56775	-	1289	A		Chr1	16594005	16594147	AT1TE54685	+	142	B
	Chr1	17143284	17143356	AT1TE56785	+	72	A		Chr1	16594798	16595103	AT1TE54690	+	305	B
	Chr1	17143385	17144656	AT1TE56795	+	1271	A		Chr1	16595103	16595133	AT1TE54695	-	30	B
	Chr1	17145079	17145454	AT1TE56805	+	375	A		Chr1	16595997	16596124	AT1TE54700	+	128	B
	Chr1	17151788	17152908	AT1TE56835	+	1120	A		Chr1	16596124	16596175	AT1TE54705	-	51	B
	Chr1	17187625	17188028	AT1TE56945	-	403	A		Chr1	16596175	16598192	AT1TE54710	+	2017	B
	Chr1	17194071	17194987	AT1TE56975	+	916	A		Chr1	16598192	16598634	AT1TE54715	+	442	B
	Chr1	17201570	17201916	AT1TE57020	-	346	A		Chr1	16598989	16600072	AT1TE54720	+	1083	B
	Chr1	17203925	17206318	AT1TE57025	+	2393	A		Chr1	16600131	16600658	AT1TE54725	-	527	B
	Chr1	17213315	17213731	AT1TE57040	+	416	A		Chr1	16601424	16601517	AT1TE54730	-	93	B
	Chr1	17214214	17215150	AT1TE57045	+	936	A		Chr1	16601585	16602145	AT1TE54740	+	560	B
	Chr1	17229159	17229303	AT1TE57120	-	144	A		Chr1	16606611	16607394	AT1TE54750	+	783	B
	Chr1	17239651	17239902	AT1TE57155	-	251	A		Chr1	16607405	16607486	AT1TE54755	-	81	B
	Chr1	17240900	17241909	AT1TE57160	+	1009	A		Chr1	16607488	16611583	AT1TE54760	+	4095	B
	Chr1	17267054	17268180	AT1TE57235	+	1126	A		Chr1	16613027	16616953	AT1TE54770	-	3926	B
	Chr1	17290068	17290814	AT1TE57300	-	746	A		Chr1	16626036	16637234	AT1TE54805	-	11198	B
	Chr1	17293309	17293444	AT1TE57310	-	135	A		Chr1	16659687	16664330	AT1TE54925	-	4643	B
	Chr1	17300097	17300317	AT1TE57330	+	220	A		Chr1	16666208	16666702	AT1TE54930	-	494	B
	Chr1	17340981	17341706	AT1TE57460	+	725	A		Chr1	16674907	16675422	AT1TE54970	+	515	B
	Chr1	17345759	17346935	AT1TE57480	+	1176	A		Chr1	16675424	16676972	AT1TE54975	+	1548	B
	Chr1	17349653	17350231	AT1TE57500	+	578	A		Chr1	16676972	16677131	AT1TE54980	+	159	B
	Chr1	17360725	17365910	AT1TE57530	+	5185	A		Chr1	16677343	16680139	AT1TE54990	+	2796	B
	Chr1	17376312	17378567	AT1TE57560	-	2255	A		Chr1	16680180	16683546	AT1TE55000	+	3366	B
	Chr1	17384368	17384486	AT1TE57570	+	118	A		Chr1	16685257	16686269	AT1TE55015	+	1012	B
	Chr1	17404315	17404744	AT1TE57630	+	429	A		Chr1	16690373	16690630	AT1TE55050	-	258	B
	Chr1	17406544	17409066	AT1TE57655	-	2522	A		Chr1	16691747	16695154	AT1TE55070	-	3407	B
	Chr1	17409422	17409571	AT1TE57665	+	149	A		Chr1	16695154	16697937	AT1TE55075	-	2783	B
	Chr1	17410971	17411288	AT1TE57680	-	317	A		Chr1	16698149	16698313	AT1TE55085	-	164	B
	Chr1	17411985	17413128	AT1TE57695	-	1143	A		Chr1	16698313	16699068	AT1TE55090	-	755	B
	Chr1	17413146	17413305	AT1TE57700	+	159	A		Chr1	16710550	16711103	AT1TE55180	+	553	B
	Chr1	17415477	17416206	AT1TE57710	+	729	A		Chr1	16732010	16732148	AT1TE55290	-	138	B
	Chr1	17416584	17416984	AT1TE57715	+	400	A		Chr1	16732148	16733523	AT1TE55295	-	1375	B
	Chr1	17430821	17432230	AT1TE57770	+	1409	A		Chr1	16742378	16751122	AT1TE55320	-	8744	B
	Chr1	17438812	17439704	AT1TE57790	+	892	A		Chr1	16791276	16791723	AT1TE55520	+	447	B
	Chr1	17447859	17448067	AT1TE57815	-	208	A		Chr1	16828789	16829209	AT1TE55680	+	420	B
	Chr1	17448067	17449699	AT1TE57820	-	1632	A		Chr1	16853328	16858040	AT1TE55795	-	4712	B
	Chr1	17449699	17449888	AT1TE57825	-	189	A		Chr1	16903430	16906912	AT1TE55985	+	3482	B
	Chr1	17465433	17466502	AT1TE57885	+	1069	A		Chr1	16939142	16939241	AT1TE56115	+	99	B
	Chr1	17502231	17502943	AT1TE58000	+	712	A		Chr1	16942840	16962196	AT1TE56135	+	19356	B
	Chr1	17502943	17503720	AT1TE58005	-	777	A		Chr1	16953914	16957460	AT1TE56140	+	3546	B
	Chr1	17512903	17513068	AT1TE58040	+	165	A		Chr1	16985001	16985852	AT1TE56235	+	851	B
	Chr1	17515021	17515483	AT1TE58055	+	462	A		Chr1	16986004	16986041	AT1TE56240	-	37	B
	Chr1	17516122	17516267	AT1TE58065	+	145	A		Chr1	16986041	16987141	AT1TE56245	-	1100	B
	Chr1	17525126	17525254	AT1TE58080	+	128	A		Chr1	17015857	17016880	AT1TE56360	+	1023	B
	Chr1	17542762	17543114	AT1TE58130	+	352	A		Chr1	17017021	17018618	AT1TE56365	+	1597	B
	Chr1	17544482	17544627	AT1TE58140	+	145	A		Chr1	17019634	17019761	AT1TE56370	-	127	B
	Chr1	17544935	17546348	AT1TE58155	+	1413	A		Chr1	17023915	17029257	AT1TE56390	-	5342	B
	Chr1	17547727	17547872	AT1TE58165	+	145	A		Chr1	17029605	17030400	AT1TE56400	+	795	B
	Chr1	17548183	17549180	AT1TE58180	+	997	A		Chr1	17035032	17050039	AT1TE56420	+	15007	B
	Chr1	17551125	17553241	AT1TE58195	-	2116	A		Chr1	17035064	17050021	AT1TE56425	+	14957	B
	Chr1	17551559	17552174	AT1TE58205	+	615	A		Chr1	17101875	17103933	AT1TE56585	+	2058	B
	Chr1	17554786	17555068	AT1TE58230	+	282	A		Chr1	17196166	17197459	AT1TE56990	+	1293	B
	Chr1	17555108	17555179	AT1TE58235	+	71	A		Chr1	17200976	17201083	AT1TE57010	-	107	B
	Chr1	17555179	17555711	AT1TE58240	-	532	A		Chr1	17201387	17202175	AT1TE57015	+	788	B
	Chr1	17555711	17556047	AT1TE58245	-	336	A		Chr1	17215220	17216165	AT1TE57060	+	945	B
	Chr1	17563198	17563852	AT1TE58290	+	654	A		Chr1	17216534	17217243	AT1TE57070	+	709	B
	Chr1	17565163	17565319	AT1TE58300	-	156	A		Chr1	17257526	17261439	AT1TE57220	+	3913	B
	Chr1	17565319	17565829	AT1TE58305	-	510	A		Chr1	17332479	17333420	AT1TE57440	-	941	B
	Chr1	17571313	17571922	AT1TE58325	-	609	A		Chr1	17381433	17381809	AT1TE57565	-	376	B
	Chr1	17574109	17574664	AT1TE58335	-	555	A		Chr1	17404744	17406246	AT1TE57635	-	1502	B
	Chr1	17576087	17576129	AT1TE58340	+	42	A		Chr1	17404787	17406194	AT1TE57640	-	1407	B
	Chr1	17576129	17577445	AT1TE58345	-	1316	A		Chr1	17411462	17411887	AT1TE57685	-	425	B
	Chr1	17605500	17606391	AT1TE58430	+	891	A		Chr1	17513191	17515002	AT1TE58050	+	1811	B
	Chr1	17607200	17607973	AT1TE58445	+	773	A		Chr1	17515483	17515727	AT1TE58060	+	244	B
	Chr1	17614932	17615625	AT1TE58460	-	693	A		Chr1	17520594	17525126	AT1TE58075	+	4532	B
	Chr1	17621653	17621887	AT1TE58490	+	234	A		Chr1	17532165	17532763	AT1TE58100	-	598	B
	Chr1	17624833	17627298	AT1TE58505	-	2465	A		Chr1	17533773	17534050	AT1TE58105	+	277	B
	Chr1	17627298	17627355	AT1TE58510	-	57	A		Chr1	17565829	17566111	AT1TE58310	-	282	B
	Chr1	17640403	17640631	AT1TE58560	+	228	A		Chr1	17608021	17611915	AT1TE58455	-	3894	B
	Chr1	17654582	17655619	AT1TE58615	+	1037	A		Chr1	17619878	17620625	AT1TE58480	+	747	B
	Chr1	17664620	17664724	AT1TE58640	+	104	A		Chr1	17632374	17633144	AT1TE58525	+	770	B
	Chr1	17664922	17665029	AT1TE58645	+	107	A		Chr1	17656304	17656748	AT1TE58620	+	444	B
	Chr1	17665029	17666250	AT1TE58650	-	1221	A		Chr1	17656786	17660319	AT1TE58625	+	3533	B
	Chr1	17666250	17666684	AT1TE58655	-	434	A		Chr1	17676785	17681203	AT1TE58700	-	4418	B
	Chr1	17666685	17666817	AT1TE58660	+	133	A		Chr1	17713519	17714780	AT1TE58825	+	1261	B
	Chr1	17673760	17674478	AT1TE58685	+	718	A		Chr1	18002176	18007370	AT1TE59745	-	5194	B
	Chr1	17685243	17686629	AT1TE58725	-	1386	A		Chr1	18013161	18018435	AT1TE59755	+	5274	B
	Chr1	17686629	17686656	AT1TE58730	+	27	A		Chr1	18096128	18096961	AT1TE60000	-	833	B
	Chr1	17689626	17690659	AT1TE58740	+	1033	A		Chr1	18154504	18163494	AT1TE60180	+	8990	B
	Chr1	17708149	17710775	AT1TE58820	+	2626	A		Chr1	18297467	18297687	AT1TE60630	-	220	B
	Chr1	17715277	17715450	AT1TE58830	-	173	A		Chr1	18397544	18398546	AT1TE60965	+	1003	B
	Chr1	17766176	17766266	AT1TE59000	-	90	A		Chr1	18457137	18457358	AT1TE61175	-	221	B
	Chr1	17812265	17812524	AT1TE59130	+	259	A		Chr1	18789807	18793041	AT1TE62285	-	3234	B
	Chr1	17812533	17813882	AT1TE59135	-	1349	A		Chr1	18846374	18854882	AT1TE62470	-	8508	B
	Chr1	17819844	17821266	AT1TE59155	-	1422	A		Chr1	18966108	18969386	AT1TE62820	-	3278	B
	Chr1	17821506	17822618	AT1TE59160	+	1112	A		Chr1	18994616	18995469	AT1TE62915	-	853	B
	Chr1	17822618	17822857	AT1TE59165	-	239	A		Chr1	19027928	19028033	AT1TE63035	+	105	B
	Chr1	17822857	17823602	AT1TE59170	+	745	A		Chr1	19061527	19064852	AT1TE63170	+	3325	B
	Chr1	17823603	17823728	AT1TE59175	-	125	A		Chr1	19219594	19220224	AT1TE63680	+	630	B
	Chr1	17824799	17825358	AT1TE59180	-	559	A		Chr1	19234628	19236158	AT1TE63735	-	1530	B
	Chr1	17831151	17831580	AT1TE59195	+	429	A		Chr1	19283479	19284034	AT1TE63925	+	555	B
	Chr1	17840570	17840805	AT1TE59230	-	235	A		Chr1	19336305	19345618	AT1TE64080	+	9313	B
	Chr1	17842302	17845285	AT1TE59235	+	2983	A		Chr1	19374608	19380747	AT1TE64170	-	6139	B
	Chr1	17861019	17861356	AT1TE59280	-	337	A		Chr1	19403368	19403645	AT1TE64275	-	277	B
	Chr1	17873851	17873885	AT1TE59315	+	34	A		Chr1	19465122	19467623	AT1TE64445	-	2501	B
	Chr1	17873885	17874352	AT1TE59320	+	467	A		Chr1	19665948	19666845	AT1TE65030	+	897	B
	Chr1	17899006	17899245	AT1TE59400	+	239	A		Chr1	19675548	19680353	AT1TE65060	+	4805	B
	Chr1	17899729	17902421	AT1TE59415	+	2692	A		Chr1	19725521	19726017	AT1TE65200	+	496	B
	Chr1	17928868	17929873	AT1TE59510	+	1005	A		Chr1	19726017	19735182	AT1TE65205	+	9165	B
	Chr1	17936923	17937991	AT1TE59535	+	1068	A		Chr1	19728520	19730000	AT1TE65210	+	1480	B
	Chr1	17978756	17979423	AT1TE59670	-	667	A		Chr1	19767862	19769832	AT1TE65360	-	1970	B
	Chr1	18019679	18019944	AT1TE59765	+	265	A		Chr1	19769025	19769639	AT1TE65365	+	614	B
	Chr1	18020919	18022668	AT1TE59770	-	1749	A		Chr1	19941384	19945434	AT1TE65925	+	4050	B
	Chr1	18029275	18029335	AT1TE59790	-	60	A		Chr1	20085178	20090143	AT1TE66380	+	4965	B
	Chr1	18033270	18034112	AT1TE59800	+	842	A		Chr1	20172045	20172728	AT1TE66640	-	684	B
	Chr1	18053194	18054218	AT1TE59860	-	1024	A		Chr1	20278142	20278823	AT1TE67005	+	681	B
	Chr1	18055830	18056097	AT1TE59875	-	267	A		Chr1	20315686	20316157	AT1TE67130	-	471	B
	Chr1	18089634	18091144	AT1TE59980	+	1510	A		Chr1	20466774	20468318	AT1TE67615	-	1544	B
	Chr1	18135722	18136133	AT1TE60120	+	411	A		Chr1	20475557	20475861	AT1TE67635	+	304	B
	Chr1	18164775	18164944	AT1TE60195	+	169	A		Chr1	20475898	20477927	AT1TE67645	-	2029	B
	Chr1	18214248	18214616	AT1TE60345	+	368	A		Chr1	20823686	20825199	AT1TE68775	+	1513	B
	Chr1	18225400	18225974	AT1TE60380	-	574	A		Chr1	20972073	20974323	AT1TE69270	+	2250	B
	Chr1	18269467	18269734	AT1TE60530	-	268	A		Chr1	20979422	20980832	AT1TE69285	+	1410	B
	Chr1	18270033	18270081	AT1TE60535	-	48	A		Chr1	21124889	21125292	AT1TE69795	-	404	B
	Chr1	18270081	18270463	AT1TE60540	+	382	A		Chr1	21125293	21125354	AT1TE69800	-	62	B
	Chr1	18270463	18271031	AT1TE60545	-	568	A		Chr1	21125810	21126203	AT1TE69815	-	393	B
	Chr1	18271031	18271443	AT1TE60550	+	412	A		Chr1	21172520	21173360	AT1TE69990	-	840	B
	Chr1	18281069	18282150	AT1TE60585	-	1081	A		Chr1	21244323	21249205	AT1TE70190	-	4882	B
	Chr1	18287173	18287579	AT1TE60595	+	406	A		Chr1	21346161	21351041	AT1TE70490	-	4880	B
	Chr1	18299924	18302638	AT1TE60640	-	2714	A		Chr1	21450131	21455990	AT1TE70805	-	5859	B
	Chr1	18300266	18301257	AT1TE60645	-	991	A		Chr1	21457400	21457500	AT1TE70815	-	100	B
	Chr1	18302776	18304452	AT1TE60665	+	1676	A		Chr1	21524994	21529851	AT1TE71045	-	4857	B
	Chr1	18320602	18320669	AT1TE60720	+	67	A		Chr1	21746739	21747327	AT1TE71770	-	588	B
	Chr1	18320669	18321177	AT1TE60725	-	508	A		Chr1	21748193	21753388	AT1TE71775	+	5195	B
	Chr1	18324371	18326405	AT1TE60740	+	2034	A		Chr1	21755303	21755914	AT1TE71805	-	611	B
	Chr1	18338814	18339763	AT1TE60780	+	949	A		Chr1	21756213	21756635	AT1TE71815	-	422	B
	Chr1	18386409	18386638	AT1TE60920	-	229	A		Chr1	21796938	21801751	AT1TE71950	-	4814	B
	Chr1	18387256	18387486	AT1TE60925	+	230	A		Chr1	21833196	21838009	AT1TE72060	-	4814	B
	Chr1	18395577	18396534	AT1TE60950	-	957	A		Chr1	21853673	21853894	AT1TE72110	+	221	B
	Chr1	18415296	18415336	AT1TE61040	+	40	A		Chr1	22060008	22060730	AT1TE72845	-	722	B
	Chr1	18420692	18421416	AT1TE61055	-	724	A		Chr1	22089130	22089250	AT1TE72925	-	120	B
	Chr1	18421503	18424352	AT1TE61065	+	2849	A		Chr1	22100643	22105329	AT1TE72970	-	4686	B
	Chr1	18437208	18438136	AT1TE61110	+	928	A		Chr1	22163556	22163874	AT1TE73175	+	318	B
	Chr1	18449114	18450393	AT1TE61145	-	1279	A		Chr1	22693954	22699336	AT1TE74860	-	5382	B
	Chr1	18456782	18457134	AT1TE61170	-	352	A		Chr1	22872210	22873790	AT1TE75405	+	1580	B
	Chr1	18457968	18458190	AT1TE61180	+	223	A		Chr1	23118239	23123214	AT1TE76215	+	4975	B
	Chr1	18493600	18493711	AT1TE61290	+	111	A		Chr1	23220114	23220379	AT1TE76550	-	265	B
	Chr1	18493711	18494035	AT1TE61295	+	324	A		Chr1	23295655	23296870	AT1TE76780	-	1215	B
	Chr1	18506065	18507853	AT1TE61335	+	1788	A		Chr1	23424034	23425021	AT1TE77135	-	987	B
	Chr1	18551538	18552259	AT1TE61465	-	721	A		Chr1	23521056	23521634	AT1TE77445	-	578	B
	Chr1	18553122	18553622	AT1TE61480	-	500	A		Chr1	23754445	23755437	AT1TE78195	+	992	B
	Chr1	18553622	18553842	AT1TE61485	+	220	A		Chr1	23861853	23862339	AT1TE78515	-	486	B
	Chr1	18579496	18580199	AT1TE61565	+	703	A		Chr1	23875670	23877284	AT1TE78560	+	1614	B
	Chr1	18580233	18580302	AT1TE61575	+	69	A		Chr1	23926446	23931762	AT1TE78720	-	5316	B
	Chr1	18598975	18599359	AT1TE61630	+	384	A		Chr1	24275019	24275588	AT1TE79810	+	570	B
	Chr1	18599462	18600585	AT1TE61640	-	1123	A		Chr1	24314646	24315196	AT1TE79935	-	550	B
	Chr1	18605157	18606513	AT1TE61660	-	1356	A		Chr1	25159042	25163500	AT1TE82600	+	4458	B
	Chr1	18626813	18627361	AT1TE61735	+	548	A		Chr1	25639634	25641849	AT1TE84070	-	2215	B
	Chr1	18632330	18633937	AT1TE61755	-	1607	A		Chr1	25962303	25963306	AT1TE85075	-	1003	B
	Chr1	18643653	18644174	AT1TE61795	-	521	A		Chr1	26030838	26036307	AT1TE85290	-	5469	B
	Chr1	18745296	18745917	AT1TE62125	+	621	A		Chr1	26306946	26307617	AT1TE86175	+	671	B
	Chr1	18745926	18746043	AT1TE62130	-	118	A		Chr1	26366602	26371673	AT1TE86360	+	5071	B
	Chr1	18746043	18746141	AT1TE62135	-	98	A		Chr1	27932605	27933669	AT1TE91400	+	1064	B
	Chr1	18746141	18747137	AT1TE62140	-	996	A		Chr1	28161035	28163376	AT1TE92165	+	2341	B
	Chr1	18765891	18766872	AT1TE62200	-	981	A		Chr1	28280131	28281255	AT1TE92540	-	1124	B
	Chr1	18767011	18768116	AT1TE62215	-	1105	A		Chr1	28515061	28516118	AT1TE93275	+	1057	B
	Chr1	18768116	18770603	AT1TE62220	-	2487	A		Chr1	28526860	28527671	AT1TE93320	+	811	B
	Chr1	18804534	18805133	AT1TE62335	-	599	A		Chr1	28749936	28750178	AT1TE94070	-	242	B
	Chr1	18806507	18807394	AT1TE62360	-	887	A		Chr1	28785404	28786355	AT1TE94190	-	951	B
	Chr1	18816505	18816805	AT1TE62400	+	301	A		Chr1	28891347	28891935	AT1TE94495	-	588	B
	Chr1	18817441	18817595	AT1TE62410	+	155	A		Chr1	29377752	29379561	AT1TE96100	+	1809	B
	Chr1	18873929	18874466	AT1TE62530	-	537	A		Chr1	29474554	29479485	AT1TE96425	+	4931	B
	Chr1	18884948	18886365	AT1TE62560	-	1417	A		Chr1	29774231	29775138	AT1TE97390	-	907	B
	Chr1	18888152	18888427	AT1TE62565	-	275	A		Chr1	29840234	29841521	AT1TE97605	+	1287	B
	Chr1	18894358	18895470	AT1TE62585	+	1112	A		Chr1	30165872	30169345	AT1TE98640	-	3473	B
	Chr1	18905532	18906231	AT1TE62625	+	699	A		Chr1	30253650	30255513	AT1TE98920	-	1863	B
	Chr1	18930795	18931187	AT1TE62705	+	392	A		Chr2	10523	13069	AT2TE00010	-	2546	B
	Chr1	18962035	18962094	AT1TE62810	-	59	A		Chr2	13071	29426	AT2TE00015	-	16355	B
	Chr1	18969794	18971496	AT1TE62825	-	1702	A		Chr2	31444	42029	AT2TE00030	+	10585	B
	Chr1	18971499	18972199	AT1TE62830	-	700	A		Chr2	31486	33553	AT2TE00035	+	2067	B
	Chr1	18980599	18981376	AT1TE62865	-	777	A		Chr2	34379	36436	AT2TE00045	+	2057	B
	Chr1	18981376	18981493	AT1TE62870	-	117	A		Chr2	42128	49796	AT2TE00075	-	7668	B
	Chr1	18982386	18983645	AT1TE62875	-	1259	A		Chr2	52643	58681	AT2TE00095	-	6038	B
	Chr1	18989487	18989659	AT1TE62895	-	172	A		Chr2	58681	64005	AT2TE00110	-	5324	B
	Chr1	19024086	19024128	AT1TE63010	-	42	A		Chr2	64005	68112	AT2TE00115	-	4107	B
	Chr1	19024128	19024148	AT1TE63015	-	20	A		Chr2	65070	67094	AT2TE00120	-	2024	B
	Chr1	19024148	19024606	AT1TE63020	+	458	A		Chr2	70795	71407	AT2TE00135	+	612	B
	Chr1	19026856	19027896	AT1TE63030	+	1040	A		Chr2	243803	249211	AT2TE01000	-	5408	B
	Chr1	19054422	19056104	AT1TE63140	+	1682	A		Chr2	276793	277137	AT2TE01125	-	344	B
	Chr1	19056104	19056564	AT1TE63145	+	460	A		Chr2	374588	376262	AT2TE01550	-	1674	B
	Chr1	19073025	19073193	AT1TE63190	+	168	A		Chr2	376595	377257	AT2TE01560	-	662	B
	Chr1	19084553	19086291	AT1TE63240	+	1738	A		Chr2	390842	391401	AT2TE01620	-	559	B
	Chr1	19086336	19086473	AT1TE63250	-	138	A		Chr2	400078	400300	AT2TE01650	+	222	B
	Chr1	19086473	19087248	AT1TE63255	+	775	A		Chr2	444939	445036	AT2TE01870	+	98	B
	Chr1	19145623	19146253	AT1TE63440	-	630	A		Chr2	499934	503974	AT2TE02160	+	4040	B
	Chr1	19147564	19147602	AT1TE63455	-	38	A		Chr2	532332	537391	AT2TE02290	-	5059	B
	Chr1	19147602	19148627	AT1TE63460	-	1025	A		Chr2	566756	582571	AT2TE02465	+	15815	B
	Chr1	19171977	19173840	AT1TE63525	-	1863	A		Chr2	654873	660310	AT2TE02805	-	5437	B
	Chr1	19172429	19172980	AT1TE63530	+	551	A		Chr2	685813	687238	AT2TE02950	+	1425	B
	Chr1	19180203	19180740	AT1TE63560	-	537	A		Chr2	686374	687108	AT2TE02955	+	734	B
	Chr1	19198195	19198428	AT1TE63615	+	233	A		Chr2	723058	723482	AT2TE03145	-	424	B
	Chr1	19212368	19212533	AT1TE63660	-	165	A		Chr2	786195	787440	AT2TE03465	+	1245	B
	Chr1	19212533	19213512	AT1TE63665	+	979	A		Chr2	794449	795647	AT2TE03505	+	1198	B
	Chr1	19233922	19234058	AT1TE63730	-	136	A		Chr2	819642	819714	AT2TE03610	-	72	B
	Chr1	19236618	19237400	AT1TE63745	-	782	A		Chr2	823018	823146	AT2TE03620	+	128	B
	Chr1	19247836	19249271	AT1TE63790	-	1435	A		Chr2	904457	904625	AT2TE04060	+	168	B
	Chr1	19268282	19268543	AT1TE63880	+	261	A		Chr2	909733	914341	AT2TE04085	+	4608	B
	Chr1	19268641	19268871	AT1TE63885	-	230	A		Chr2	914341	915293	AT2TE04090	+	952	B
	Chr1	19303911	19304006	AT1TE63980	+	95	A		Chr2	932540	933984	AT2TE04145	+	1444	B
	Chr1	19316439	19317505	AT1TE64015	-	1066	A		Chr2	1017218	1017843	AT2TE04540	+	625	B
	Chr1	19327005	19329720	AT1TE64055	-	2715	A		Chr2	1065926	1066514	AT2TE04760	-	588	B
	Chr1	19329838	19330140	AT1TE64065	-	302	A		Chr2	1085478	1085514	AT2TE04870	-	36	B
	Chr1	19330142	19330778	AT1TE64070	+	636	A		Chr2	1086694	1086753	AT2TE04880	-	60	B
	Chr1	19352802	19352907	AT1TE64100	-	105	A		Chr2	1086980	1087060	AT2TE04890	-	80	B
	Chr1	19352907	19353478	AT1TE64105	-	571	A		Chr2	1087330	1090322	AT2TE04900	+	2992	B
	Chr1	19353478	19354354	AT1TE64110	-	876	A		Chr2	1090322	1090484	AT2TE04905	+	162	B
	Chr1	19388188	19388376	AT1TE64205	-	188	A		Chr2	1090484	1092946	AT2TE04910	-	2462	B
	Chr1	19389527	19389869	AT1TE64210	-	342	A		Chr2	1108691	1110025	AT2TE05000	-	1334	B
	Chr1	19391784	19395117	AT1TE64240	-	3333	A		Chr2	1176996	1177850	AT2TE05315	+	854	B
	Chr1	19399825	19400414	AT1TE64265	+	589	A		Chr2	1199027	1203654	AT2TE05410	-	4627	B
	Chr1	19403933	19404711	AT1TE64280	+	778	A		Chr2	1204271	1205405	AT2TE05420	-	1134	B
	Chr1	19415245	19415392	AT1TE64310	-	147	A		Chr2	1206014	1206684	AT2TE05425	-	670	B
	Chr1	19426503	19427034	AT1TE64340	-	531	A		Chr2	1207472	1207565	AT2TE05435	-	93	B
	Chr1	19428402	19428848	AT1TE64350	-	446	A		Chr2	1207565	1208618	AT2TE05440	+	1053	B
	Chr1	19472582	19473236	AT1TE64465	+	654	A		Chr2	1209541	1209608	AT2TE05445	+	67	B
	Chr1	19576737	19577061	AT1TE64760	+	324	A		Chr2	1209608	1210367	AT2TE05450	+	759	B
	Chr1	19593687	19593888	AT1TE64810	-	201	A		Chr2	1210367	1211793	AT2TE05455	+	1426	B
	Chr1	19593931	19594786	AT1TE64820	-	855	A		Chr2	1212437	1214281	AT2TE05470	-	1844	B
	Chr1	19595437	19597361	AT1TE64825	-	1924	A		Chr2	1215811	1216334	AT2TE05475	-	523	B
	Chr1	19597361	19599971	AT1TE64830	-	2610	A		Chr2	1216831	1217817	AT2TE05490	+	986	B
	Chr1	19630260	19630861	AT1TE64930	+	601	A		Chr2	1222443	1222977	AT2TE05510	-	534	B
	Chr1	19654970	19655716	AT1TE65005	-	746	A		Chr2	1222977	1224368	AT2TE05515	+	1391	B
	Chr1	19691498	19693591	AT1TE65080	-	2093	A		Chr2	1224459	1224687	AT2TE05525	+	228	B
	Chr1	19693216	19693478	AT1TE65085	-	262	A		Chr2	1226206	1227657	AT2TE05530	+	1451	B
	Chr1	19703140	19704372	AT1TE65110	+	1232	A		Chr2	1229232	1229454	AT2TE05535	+	222	B
	Chr1	19705881	19706850	AT1TE65120	-	969	A		Chr2	1229454	1232487	AT2TE05540	+	3033	B
	Chr1	19714706	19714878	AT1TE65150	-	172	A		Chr2	1264726	1271840	AT2TE05755	-	7114	B
	Chr1	19716392	19716455	AT1TE65155	+	63	A		Chr2	1291615	1293187	AT2TE05845	+	1572	B
	Chr1	19716455	19719259	AT1TE65160	+	2804	A		Chr2	1293564	1294497	AT2TE05855	-	933	B
	Chr1	19717820	19718604	AT1TE65165	+	784	A		Chr2	1295462	1295598	AT2TE05865	+	136	B
	Chr1	19725300	19725496	AT1TE65190	+	196	A		Chr2	1297713	1297909	AT2TE05875	-	196	B
	Chr1	19731889	19732662	AT1TE65225	+	773	A		Chr2	1297909	1298511	AT2TE05880	-	602	B
	Chr1	19736159	19736534	AT1TE65235	+	376	A		Chr2	1298511	1298955	AT2TE05885	+	444	B
	Chr1	19736535	19736645	AT1TE65240	+	111	A		Chr2	1298967	1298991	AT2TE05890	+	24	B
	Chr1	19741471	19742139	AT1TE65250	-	668	A		Chr2	1298991	1300169	AT2TE05895	+	1178	B
	Chr1	19743665	19744386	AT1TE65255	-	721	A		Chr2	1300169	1300495	AT2TE05900	+	326	B
	Chr1	19749259	19749851	AT1TE65280	+	592	A		Chr2	1300495	1300647	AT2TE05905	+	152	B
	Chr1	19762699	19763826	AT1TE65330	+	1127	A		Chr2	1300851	1301489	AT2TE05910	-	638	B
	Chr1	19808115	19810029	AT1TE65500	+	1914	A		Chr2	1302350	1303112	AT2TE05920	-	762	B
	Chr1	19876057	19876222	AT1TE65705	+	165	A		Chr2	1303567	1303996	AT2TE05925	+	429	B
	Chr1	19908864	19909195	AT1TE65810	-	331	A		Chr2	1304858	1305626	AT2TE05945	+	768	B
	Chr1	19909341	19909540	AT1TE65815	+	199	A		Chr2	1307405	1308085	AT2TE05955	-	680	B
	Chr1	19931969	19934270	AT1TE65885	+	2301	A		Chr2	1309707	1309802	AT2TE05960	+	95	B
	Chr1	19933104	19933518	AT1TE65895	-	415	A		Chr2	1309802	1310540	AT2TE05965	-	738	B
	Chr1	19993686	19995733	AT1TE66090	-	2047	A		Chr2	1311156	1311656	AT2TE05970	+	500	B
	Chr1	20016266	20016860	AT1TE66160	-	594	A		Chr2	1312742	1314083	AT2TE05980	+	1341	B
	Chr1	20153633	20154352	AT1TE66570	+	719	A		Chr2	1314083	1314171	AT2TE05985	+	88	B
	Chr1	20154053	20154314	AT1TE66575	+	261	A		Chr2	1314172	1314664	AT2TE05990	+	493	B
	Chr1	20166498	20167335	AT1TE66615	-	837	A		Chr2	1326795	1330532	AT2TE06040	+	3737	B
	Chr1	20174044	20174320	AT1TE66655	+	276	A		Chr2	1341392	1341977	AT2TE06105	-	585	B
	Chr1	20174320	20175287	AT1TE66660	+	967	A		Chr2	1341977	1342101	AT2TE06110	+	124	B
	Chr1	20194456	20194818	AT1TE66730	-	362	A		Chr2	1346627	1348486	AT2TE06135	+	1859	B
	Chr1	20205352	20206079	AT1TE66770	-	727	A		Chr2	1348486	1349078	AT2TE06140	+	592	B
	Chr1	20226441	20226747	AT1TE66850	+	306	A		Chr2	1349465	1349739	AT2TE06155	-	274	B
	Chr1	20273197	20273225	AT1TE66980	-	28	A		Chr2	1350475	1350571	AT2TE06160	-	97	B
	Chr1	20273225	20273406	AT1TE66985	-	181	A		Chr2	1353348	1353629	AT2TE06170	-	281	B
	Chr1	20312121	20312612	AT1TE67110	-	491	A		Chr2	1368849	1370370	AT2TE06245	+	1521	B
	Chr1	20312612	20312886	AT1TE67115	-	274	A		Chr2	1383514	1384426	AT2TE06350	-	912	B
	Chr1	20313844	20314471	AT1TE67120	-	627	A		Chr2	1387043	1387174	AT2TE06375	+	131	B
	Chr1	20314695	20315365	AT1TE67125	-	670	A		Chr2	1387174	1387298	AT2TE06380	+	124	B
	Chr1	20316268	20317599	AT1TE67140	-	1331	A		Chr2	1388831	1393901	AT2TE06390	-	5070	B
	Chr1	20317758	20317986	AT1TE67150	-	228	A		Chr2	1395259	1399516	AT2TE06405	+	4257	B
	Chr1	20319810	20319996	AT1TE67155	-	186	A		Chr2	1422126	1422779	AT2TE06535	+	653	B
	Chr1	20320068	20320291	AT1TE67160	-	223	A		Chr2	1422779	1422845	AT2TE06540	+	66	B
	Chr1	20322322	20322966	AT1TE67170	-	644	A		Chr2	1422845	1423129	AT2TE06545	+	284	B
	Chr1	20329351	20330733	AT1TE67185	+	1382	A		Chr2	1423164	1425427	AT2TE06550	+	2263	B
	Chr1	20331794	20333360	AT1TE67190	-	1566	A		Chr2	1434588	1435118	AT2TE06610	+	530	B
	Chr1	20334146	20334801	AT1TE67200	-	655	A		Chr2	1435378	1437967	AT2TE06620	+	2589	B
	Chr1	20362627	20362952	AT1TE67280	-	325	A		Chr2	1438821	1438882	AT2TE06630	+	61	B
	Chr1	20367161	20367525	AT1TE67290	+	364	A		Chr2	1485440	1490713	AT2TE06885	-	5273	B
	Chr1	20397884	20399270	AT1TE67365	+	1386	A		Chr2	1505384	1513550	AT2TE06955	+	8166	B
	Chr1	20399270	20399577	AT1TE67370	+	307	A		Chr2	1601055	1601379	AT2TE07390	+	324	B
	Chr1	20412552	20412934	AT1TE67415	-	382	A		Chr2	1607740	1607836	AT2TE07420	-	96	B
	Chr1	20422942	20423145	AT1TE67445	-	203	A		Chr2	1613977	1617960	AT2TE07460	+	3983	B
	Chr1	20423238	20423739	AT1TE67450	-	501	A		Chr2	1629643	1637481	AT2TE07550	-	7838	B
	Chr1	20432158	20432312	AT1TE67480	-	154	A		Chr2	1649685	1651890	AT2TE07640	-	2205	B
	Chr1	20432898	20433301	AT1TE67485	+	403	A		Chr2	1663424	1663840	AT2TE07705	-	416	B
	Chr1	20437226	20439302	AT1TE67495	+	2076	A		Chr2	1727849	1728277	AT2TE08035	-	428	B
	Chr1	20465028	20466693	AT1TE67590	-	1665	A		Chr2	1733205	1733392	AT2TE08060	-	187	B
	Chr1	20465426	20466401	AT1TE67600	+	975	A		Chr2	1741425	1757083	AT2TE08110	+	15658	B
	Chr1	20466401	20466450	AT1TE67605	+	49	A		Chr2	1758539	1766569	AT2TE08135	-	8030	B
	Chr1	20468318	20469929	AT1TE67620	-	1611	A		Chr2	1772224	1773634	AT2TE08160	+	1410	B
	Chr1	20470029	20470247	AT1TE67625	+	219	A		Chr2	1773704	1774816	AT2TE08165	-	1112	B
	Chr1	20488674	20490263	AT1TE67670	+	1589	A		Chr2	1781545	1786791	AT2TE08225	+	5246	B
	Chr1	20492479	20492875	AT1TE67695	-	396	A		Chr2	1792236	1792479	AT2TE08260	-	243	B
	Chr1	20494115	20494849	AT1TE67700	+	734	A		Chr2	1793706	1796054	AT2TE08275	+	2348	B
	Chr1	20498930	20499325	AT1TE67715	-	395	A		Chr2	1803532	1803765	AT2TE08310	-	233	B
	Chr1	20508541	20509420	AT1TE67755	-	879	A		Chr2	1804017	1821234	AT2TE08320	-	17217	B
	Chr1	20510043	20510413	AT1TE67765	-	370	A		Chr2	1829456	1832048	AT2TE08385	-	2592	B
	Chr1	20513637	20514607	AT1TE67785	+	970	A		Chr2	1841075	1841798	AT2TE08440	+	723	B
	Chr1	20519723	20521099	AT1TE67800	+	1376	A		Chr2	1850220	1850451	AT2TE08500	-	231	B
	Chr1	20520598	20520909	AT1TE67810	-	311	A		Chr2	1866089	1866478	AT2TE08590	+	389	B
	Chr1	20540947	20541038	AT1TE67865	+	91	A		Chr2	1883379	1886726	AT2TE08665	+	3347	B
	Chr1	20547876	20548257	AT1TE67880	-	381	A		Chr2	1897986	1898108	AT2TE08740	+	122	B
	Chr1	20559589	20560402	AT1TE67920	-	813	A		Chr2	1899021	1899521	AT2TE08750	-	501	B
	Chr1	20622392	20622836	AT1TE68120	+	445	A		Chr2	1902751	1903923	AT2TE08765	+	1172	B
	Chr1	20649026	20649668	AT1TE68210	+	642	A		Chr2	1905594	1906142	AT2TE08780	+	548	B
	Chr1	20649173	20649582	AT1TE68215	-	410	A		Chr2	1906834	1912111	AT2TE08785	-	5277	B
	Chr1	20683158	20685683	AT1TE68310	-	2525	A		Chr2	1928661	1929400	AT2TE08860	+	739	B
	Chr1	20686616	20686802	AT1TE68315	-	186	A		Chr2	1939909	1940758	AT2TE08905	-	849	B
	Chr1	20687244	20687834	AT1TE68320	+	590	A		Chr2	1968286	1968946	AT2TE09085	-	660	B
	Chr1	20696827	20697332	AT1TE68355	-	505	A		Chr2	1970283	1974992	AT2TE09100	+	4709	B
	Chr1	20699803	20700043	AT1TE68365	+	240	A		Chr2	1995887	2010496	AT2TE09205	-	14609	B
	Chr1	20709455	20711250	AT1TE68395	-	1795	A		Chr2	2035933	2041281	AT2TE09360	-	5348	B
	Chr1	20747892	20748615	AT1TE68515	+	723	A		Chr2	2041963	2054217	AT2TE09375	-	12254	B
	Chr1	20795215	20795640	AT1TE68670	+	425	A		Chr2	2057978	2058044	AT2TE09390	-	66	B
	Chr1	20826179	20827505	AT1TE68785	+	1326	A		Chr2	2058044	2059187	AT2TE09395	-	1143	B
	Chr1	20914031	20914274	AT1TE69070	-	243	A		Chr2	2059201	2059642	AT2TE09400	+	441	B
	Chr1	20914274	20914938	AT1TE69075	+	664	A		Chr2	2059914	2060025	AT2TE09405	-	111	B
	Chr1	21018770	21019194	AT1TE69400	-	424	A		Chr2	2061855	2062677	AT2TE09410	-	822	B
	Chr1	21033412	21034260	AT1TE69440	-	848	A		Chr2	2063330	2063901	AT2TE09420	+	571	B
	Chr1	21037829	21038235	AT1TE69455	-	406	A		Chr2	2064980	2065081	AT2TE09425	-	102	B
	Chr1	21038235	21038827	AT1TE69460	-	592	A		Chr2	2075338	2080607	AT2TE09500	-	5269	B
	Chr1	21042268	21042929	AT1TE69495	-	661	A		Chr2	2085587	2086346	AT2TE09540	+	760	B
	Chr1	21053505	21053617	AT1TE69525	-	112	A		Chr2	2091083	2092826	AT2TE09565	-	1743	B
	Chr1	21066230	21066452	AT1TE69560	-	222	A		Chr2	2092826	2096399	AT2TE09570	-	3573	B
	Chr1	21066909	21067588	AT1TE69565	+	679	A		Chr2	2093413	2094320	AT2TE09575	-	907	B
	Chr1	21067588	21067896	AT1TE69570	-	308	A		Chr2	2101050	2101414	AT2TE09600	-	364	B
	Chr1	21080631	21081127	AT1TE69615	-	496	A		Chr2	2102764	2103473	AT2TE09605	+	709	B
	Chr1	21103162	21104416	AT1TE69700	-	1254	A		Chr2	2104400	2104635	AT2TE09610	-	235	B
	Chr1	21105276	21105955	AT1TE69735	+	679	A		Chr2	2105629	2106808	AT2TE09625	+	1179	B
	Chr1	21106909	21107725	AT1TE69745	-	816	A		Chr2	2109884	2110083	AT2TE09635	-	199	B
	Chr1	21120455	21120564	AT1TE69780	-	109	A		Chr2	2110083	2114697	AT2TE09640	-	4614	B
	Chr1	21125354	21125756	AT1TE69805	-	402	A		Chr2	2129181	2130219	AT2TE09695	-	1038	B
	Chr1	21125757	21125793	AT1TE69810	+	37	A		Chr2	2130244	2130570	AT2TE09705	+	326	B
	Chr1	21127989	21128869	AT1TE69835	+	880	A		Chr2	2131034	2133043	AT2TE09710	-	2009	B
	Chr1	21131907	21132147	AT1TE69860	+	240	A		Chr2	2133089	2134050	AT2TE09720	+	961	B
	Chr1	21144655	21144913	AT1TE69900	-	258	A		Chr2	2134452	2137255	AT2TE09735	+	2803	B
	Chr1	21209686	21211361	AT1TE70100	-	1675	A		Chr2	2137255	2137625	AT2TE09740	+	370	B
	Chr1	21211545	21211881	AT1TE70105	-	337	A		Chr2	2153888	2157853	AT2TE09885	+	3965	B
	Chr1	21215657	21215832	AT1TE70115	-	176	A		Chr2	2154869	2155879	AT2TE09890	-	1010	B
	Chr1	21228850	21229015	AT1TE70150	-	165	A		Chr2	2156281	2156452	AT2TE09895	+	171	B
	Chr1	21260146	21261030	AT1TE70230	+	884	A		Chr2	2157853	2158001	AT2TE09900	+	148	B
	Chr1	21335893	21336605	AT1TE70470	+	712	A		Chr2	2158737	2158784	AT2TE09905	-	47	B
	Chr1	21341499	21342530	AT1TE70480	-	1031	A		Chr2	2158784	2160189	AT2TE09910	-	1405	B
	Chr1	21359986	21360536	AT1TE70520	+	550	A		Chr2	2160789	2161355	AT2TE09925	+	566	B
	Chr1	21365441	21365626	AT1TE70535	+	185	A		Chr2	2164242	2167690	AT2TE09955	+	3448	B
	Chr1	21387932	21389492	AT1TE70600	-	1560	A		Chr2	2168618	2168772	AT2TE09960	-	154	B
	Chr1	21390066	21391113	AT1TE70615	+	1047	A		Chr2	2192438	2192500	AT2TE10095	+	62	B
	Chr1	21392850	21392997	AT1TE70630	+	147	A		Chr2	2192500	2193620	AT2TE10100	+	1120	B
	Chr1	21398751	21399739	AT1TE70640	-	988	A		Chr2	2193620	2195420	AT2TE10105	-	1800	B
	Chr1	21400668	21401371	AT1TE70645	+	703	A		Chr2	2203889	2205314	AT2TE10160	+	1425	B
	Chr1	21418458	21418545	AT1TE70700	-	87	A		Chr2	2217433	2218007	AT2TE10230	+	574	B
	Chr1	21428115	21428825	AT1TE70735	-	710	A		Chr2	2218105	2218470	AT2TE10240	+	365	B
	Chr1	21470186	21470365	AT1TE70850	+	179	A		Chr2	2218691	2218921	AT2TE10245	+	231	B
	Chr1	21472095	21472272	AT1TE70865	+	177	A		Chr2	2218964	2220284	AT2TE10255	+	1320	B
	Chr1	21476035	21477001	AT1TE70875	+	966	A		Chr2	2220285	2221186	AT2TE10260	-	901	B
	Chr1	21477380	21477447	AT1TE70880	+	67	A		Chr2	2221186	2222415	AT2TE10265	-	1229	B
	Chr1	21507772	21508044	AT1TE70985	+	272	A		Chr2	2223751	2224419	AT2TE10270	+	668	B
	Chr1	21509600	21510092	AT1TE70995	+	492	A		Chr2	2225084	2225583	AT2TE10275	+	499	B
	Chr1	21514820	21515306	AT1TE71005	-	486	A		Chr2	2225583	2225807	AT2TE10280	+	224	B
	Chr1	21523953	21524951	AT1TE71035	+	998	A		Chr2	2226024	2226195	AT2TE10290	+	171	B
	Chr1	21524156	21524517	AT1TE71040	-	361	A		Chr2	2226195	2227022	AT2TE10295	+	827	B
	Chr1	21581777	21582008	AT1TE71210	-	231	A		Chr2	2227022	2227312	AT2TE10300	-	290	B
	Chr1	21582695	21583070	AT1TE71215	-	375	A		Chr2	2227312	2227560	AT2TE10305	-	248	B
	Chr1	21609619	21609904	AT1TE71305	+	285	A		Chr2	2228622	2229017	AT2TE10310	-	395	B
	Chr1	21615297	21616150	AT1TE71330	-	853	A		Chr2	2240579	2241230	AT2TE10360	-	651	B
	Chr1	21628786	21628868	AT1TE71370	-	82	A		Chr2	2246168	2256074	AT2TE10385	-	9906	B
	Chr1	21637418	21638230	AT1TE71405	-	812	A		Chr2	2273548	2274110	AT2TE10490	+	562	B
	Chr1	21640520	21640771	AT1TE71415	-	251	A		Chr2	2274202	2280054	AT2TE10495	+	5852	B
	Chr1	21675557	21675921	AT1TE71515	+	364	A		Chr2	2295825	2296323	AT2TE10575	+	498	B
	Chr1	21681522	21682456	AT1TE71540	+	934	A		Chr2	2296811	2298015	AT2TE10585	+	1204	B
	Chr1	21683263	21683488	AT1TE71550	+	225	A		Chr2	2297815	2298721	AT2TE10595	+	906	B
	Chr1	21710248	21710625	AT1TE71640	-	377	A		Chr2	2299821	2301751	AT2TE10615	-	1930	B
	Chr1	21731637	21732236	AT1TE71705	+	599	A		Chr2	2318503	2322143	AT2TE10690	+	3640	B
	Chr1	21738688	21740552	AT1TE71725	+	1864	A		Chr2	2321202	2321332	AT2TE10715	+	130	B
	Chr1	21741592	21741796	AT1TE71740	-	204	A		Chr2	2366174	2367075	AT2TE10910	+	901	B
	Chr1	21741796	21742041	AT1TE71745	-	245	A		Chr2	2367077	2369546	AT2TE10915	+	2469	B
	Chr1	21744194	21745093	AT1TE71755	-	899	A		Chr2	2369619	2371468	AT2TE10925	+	1849	B
	Chr1	21754362	21755189	AT1TE71790	-	827	A		Chr2	2374269	2378354	AT2TE10945	+	4085	B
	Chr1	21755962	21756732	AT1TE71810	-	770	A		Chr2	2378390	2382180	AT2TE10955	-	3790	B
	Chr1	21756999	21758625	AT1TE71825	-	1626	A		Chr2	2382310	2382673	AT2TE10960	-	363	B
	Chr1	21758659	21759682	AT1TE71830	+	1023	A		Chr2	2382673	2389184	AT2TE10965	-	6511	B
	Chr1	21786756	21787461	AT1TE71915	+	706	A		Chr2	2389184	2390869	AT2TE10970	-	1685	B
	Chr1	21823013	21823719	AT1TE72020	+	706	A		Chr2	2390869	2399529	AT2TE10975	+	8660	B
	Chr1	21856929	21857822	AT1TE72120	+	893	A		Chr2	2399530	2410158	AT2TE10980	-	10628	B
	Chr1	21872093	21872178	AT1TE72160	-	86	A		Chr2	2401124	2402966	AT2TE10985	-	1842	B
	Chr1	21872178	21872788	AT1TE72165	+	610	A		Chr2	2416280	2423558	AT2TE11040	+	7278	B
	Chr1	21872790	21873779	AT1TE72170	-	989	A		Chr2	2418613	2423173	AT2TE11050	+	4560	B
	Chr1	21873779	21873966	AT1TE72175	-	187	A		Chr2	2436993	2442260	AT2TE11110	-	5267	B
	Chr1	21911772	21913054	AT1TE72310	-	1282	A		Chr2	2442265	2443224	AT2TE11115	-	959	B
	Chr1	21918285	21919763	AT1TE72325	+	1478	A		Chr2	2443913	2445960	AT2TE11125	-	2047	B
	Chr1	21918430	21918995	AT1TE72330	+	566	A		Chr2	2446760	2447741	AT2TE11140	-	981	B
	Chr1	21947150	21947270	AT1TE72450	-	120	A		Chr2	2447741	2454177	AT2TE11145	+	6436	B
	Chr1	21957836	21957975	AT1TE72500	-	140	A		Chr2	2454756	2460915	AT2TE11165	-	6159	B
	Chr1	21991153	21991448	AT1TE72610	-	296	A		Chr2	2461725	2468223	AT2TE11210	+	6498	B
	Chr1	21991448	21992506	AT1TE72615	-	1058	A		Chr2	2463440	2464621	AT2TE11220	-	1181	B
	Chr1	21992782	21992974	AT1TE72620	-	192	A		Chr2	2465243	2465960	AT2TE11230	+	717	B
	Chr1	21995403	21996608	AT1TE72630	+	1205	A		Chr2	2468636	2469090	AT2TE11245	+	454	B
	Chr1	22043295	22043403	AT1TE72790	-	108	A		Chr2	2469090	2470294	AT2TE11250	-	1204	B
	Chr1	22086295	22087917	AT1TE72920	+	1622	A		Chr2	2470294	2470890	AT2TE11255	+	596	B
	Chr1	22089250	22089743	AT1TE72930	+	493	A		Chr2	2471484	2472656	AT2TE11260	-	1172	B
	Chr1	22105362	22106636	AT1TE72980	-	1274	A		Chr2	2473161	2473831	AT2TE11275	-	670	B
	Chr1	22107438	22107932	AT1TE72990	+	494	A		Chr2	2474106	2474563	AT2TE11280	-	457	B
	Chr1	22108380	22108908	AT1TE72995	+	528	A		Chr2	2479446	2480950	AT2TE11300	+	1505	B
	Chr1	22111958	22112753	AT1TE73010	+	795	A		Chr2	2483255	2484583	AT2TE11315	+	1328	B
	Chr1	22112754	22113280	AT1TE73015	+	527	A		Chr2	2485055	2485331	AT2TE11320	+	276	B
	Chr1	22162431	22162602	AT1TE73160	+	171	A		Chr2	2486952	2487779	AT2TE11325	-	827	B
	Chr1	22163232	22163448	AT1TE73170	+	216	A		Chr2	2487780	2491971	AT2TE11330	+	4191	B
	Chr1	22163874	22164107	AT1TE73180	+	233	A		Chr2	2492017	2494444	AT2TE11340	+	2427	B
	Chr1	22165043	22166347	AT1TE73190	-	1304	A		Chr2	2494503	2500632	AT2TE11350	+	6129	B
	Chr1	22167789	22167964	AT1TE73205	+	175	A		Chr2	2500632	2504274	AT2TE11355	-	3642	B
	Chr1	22182645	22183141	AT1TE73260	-	496	A		Chr2	2504979	2510352	AT2TE11370	-	5373	B
	Chr1	22191820	22192616	AT1TE73300	+	796	A		Chr2	2510352	2512186	AT2TE11375	-	1834	B
	Chr1	22206450	22208079	AT1TE73345	+	1629	A		Chr2	2512299	2513366	AT2TE11385	-	1067	B
	Chr1	22224561	22224825	AT1TE73400	-	264	A		Chr2	2513366	2513445	AT2TE11390	+	79	B
	Chr1	22231070	22232773	AT1TE73425	-	1703	A		Chr2	2513445	2514798	AT2TE11395	+	1353	B
	Chr1	22282555	22283316	AT1TE73570	+	761	A		Chr2	2514798	2517448	AT2TE11400	-	2650	B
	Chr1	22376084	22376877	AT1TE73865	+	793	A		Chr2	2516560	2516873	AT2TE11405	-	313	B
	Chr1	22449882	22452429	AT1TE74085	+	2547	A		Chr2	2517531	2520502	AT2TE11410	+	2971	B
	Chr1	22456416	22456546	AT1TE74095	+	130	A		Chr2	2520665	2521490	AT2TE11420	+	825	B
	Chr1	22482658	22483139	AT1TE74180	-	481	A		Chr2	2521828	2522232	AT2TE11425	+	404	B
	Chr1	22521081	22521555	AT1TE74285	-	474	A		Chr2	2522605	2522871	AT2TE11430	+	266	B
	Chr1	22542139	22542307	AT1TE74360	+	169	A		Chr2	2523630	2527699	AT2TE11435	-	4069	B
	Chr1	22562684	22563702	AT1TE74430	-	1018	A		Chr2	2529074	2535262	AT2TE11445	-	6188	B
	Chr1	22592371	22593721	AT1TE74530	-	1350	A		Chr2	2535983	2536163	AT2TE11485	-	181	B
	Chr1	22606463	22607478	AT1TE74575	+	1016	A		Chr2	2536602	2537527	AT2TE11490	-	925	B
	Chr1	22620536	22627023	AT1TE74615	-	6487	A		Chr2	2539100	2541787	AT2TE11500	-	2687	B
	Chr1	22637087	22637627	AT1TE74670	+	540	A		Chr2	2541787	2541958	AT2TE11505	-	171	B
	Chr1	22751638	22751805	AT1TE75010	+	167	A		Chr2	2542616	2559353	AT2TE11515	-	16737	B
	Chr1	22775860	22776617	AT1TE75065	+	757	A		Chr2	2561714	2562665	AT2TE11535	-	951	B
	Chr1	22777307	22777670	AT1TE75075	-	364	A		Chr2	2562809	2570724	AT2TE11540	-	7915	B
	Chr1	22778333	22779072	AT1TE75090	+	739	A		Chr2	2576248	2578241	AT2TE11560	-	1993	B
	Chr1	22828602	22829372	AT1TE75245	+	770	A		Chr2	2590778	2591779	AT2TE11635	-	1001	B
	Chr1	22844697	22845235	AT1TE75290	-	538	A		Chr2	2593734	2596529	AT2TE11665	-	2795	B
	Chr1	22846335	22854554	AT1TE75305	+	8219	A		Chr2	2601870	2602447	AT2TE11690	-	577	B
	Chr1	22850635	22851679	AT1TE75330	+	1044	A		Chr2	2602447	2603916	AT2TE11695	-	1469	B
	Chr1	22851679	22851906	AT1TE75335	+	227	A		Chr2	2604494	2604656	AT2TE11700	-	162	B
	Chr1	22855427	22855824	AT1TE75350	-	397	A		Chr2	2606792	2607607	AT2TE11715	-	815	B
	Chr1	22889077	22889452	AT1TE75445	-	375	A		Chr2	2607811	2608131	AT2TE11725	-	320	B
	Chr1	22991839	22994059	AT1TE75780	-	2220	A		Chr2	2609185	2610900	AT2TE11735	-	1715	B
	Chr1	23031590	23031816	AT1TE75910	+	226	A		Chr2	2619115	2620320	AT2TE11760	-	1205	B
	Chr1	23093712	23094066	AT1TE76110	-	354	A		Chr2	2622153	2623982	AT2TE11765	+	1829	B
	Chr1	23096072	23097785	AT1TE76130	-	1713	A		Chr2	2625098	2627990	AT2TE11770	+	2892	B
	Chr1	23125125	23125808	AT1TE76235	-	683	A		Chr2	2628231	2628284	AT2TE11775	+	53	B
	Chr1	23149768	23149995	AT1TE76310	+	227	A		Chr2	2628284	2629677	AT2TE11780	+	1393	B
	Chr1	23152827	23153329	AT1TE76325	-	502	A		Chr2	2630314	2631713	AT2TE11795	+	1399	B
	Chr1	23160753	23160977	AT1TE76345	+	224	A		Chr2	2632429	2635807	AT2TE11805	+	3378	B
	Chr1	23174794	23175117	AT1TE76405	-	323	A		Chr2	2636199	2637023	AT2TE11810	+	824	B
	Chr1	23197418	23197681	AT1TE76470	-	263	A		Chr2	2638831	2648149	AT2TE11815	+	9318	B
	Chr1	23211863	23212737	AT1TE76520	+	874	A		Chr2	2649166	2652057	AT2TE11820	+	2891	B
	Chr1	23213592	23215627	AT1TE76530	+	2035	A		Chr2	2652342	2652381	AT2TE11830	+	39	B
	Chr1	23240231	23242673	AT1TE76620	-	2442	A		Chr2	2652444	2655100	AT2TE11840	-	2656	B
	Chr1	23281602	23282774	AT1TE76735	-	1172	A		Chr2	2655429	2655849	AT2TE11855	-	420	B
	Chr1	23297075	23297257	AT1TE76785	-	182	A		Chr2	2655849	2657963	AT2TE11860	-	2114	B
	Chr1	23312998	23313154	AT1TE76830	-	156	A		Chr2	2658315	2659414	AT2TE11870	-	1099	B
	Chr1	23321141	23322080	AT1TE76850	-	939	A		Chr2	2659688	2660110	AT2TE11880	+	422	B
	Chr1	23393067	23394635	AT1TE77055	+	1568	A		Chr2	2660935	2664200	AT2TE11890	+	3265	B
	Chr1	23430954	23431563	AT1TE77150	-	609	A		Chr2	2664599	2665423	AT2TE11895	+	824	B
	Chr1	23435100	23435292	AT1TE77165	-	192	A		Chr2	2666854	2678073	AT2TE11900	+	11219	B
	Chr1	23454907	23454928	AT1TE77220	+	21	A		Chr2	2678104	2681641	AT2TE11920	-	3537	B
	Chr1	23454949	23455733	AT1TE77230	+	784	A		Chr2	2681641	2685670	AT2TE11925	-	4029	B
	Chr1	23510460	23510643	AT1TE77415	-	183	A		Chr2	2685673	2688359	AT2TE11930	+	2686	B
	Chr1	23553588	23554635	AT1TE77560	-	1047	A		Chr2	2691571	2693140	AT2TE11955	+	1569	B
	Chr1	23566325	23566585	AT1TE77600	-	261	A		Chr2	2693147	2695069	AT2TE11960	-	1922	B
	Chr1	23613635	23614326	AT1TE77760	-	691	A		Chr2	2696018	2696711	AT2TE11970	+	693	B
	Chr1	23651610	23652016	AT1TE77880	-	406	A		Chr2	2699308	2709964	AT2TE11985	-	10656	B
	Chr1	23710108	23711252	AT1TE78070	+	1144	A		Chr2	2699623	2700772	AT2TE11990	+	1149	B
	Chr1	23711252	23711402	AT1TE78075	+	150	A		Chr2	2707344	2708993	AT2TE12020	-	1649	B
	Chr1	23723923	23724092	AT1TE78110	+	169	A		Chr2	2709964	2712861	AT2TE12025	-	2897	B
	Chr1	23749098	23749264	AT1TE78180	+	166	A		Chr2	2712872	2720794	AT2TE12030	+	7922	B
	Chr1	23761522	23761830	AT1TE78230	-	308	A		Chr2	2721275	2722904	AT2TE12040	-	1629	B
	Chr1	23856453	23857302	AT1TE78505	+	849	A		Chr2	2722956	2723974	AT2TE12050	-	1018	B
	Chr1	23875269	23875670	AT1TE78555	-	401	A		Chr2	2724611	2727590	AT2TE12060	-	2979	B
	Chr1	23879051	23880537	AT1TE78575	-	1486	A		Chr2	2729901	2730706	AT2TE12070	-	805	B
	Chr1	23880537	23880587	AT1TE78580	+	50	A		Chr2	2739758	2743696	AT2TE12115	-	3938	B
	Chr1	23880922	23881413	AT1TE78585	-	491	A		Chr2	2745604	2752270	AT2TE12140	+	6666	B
	Chr1	23925094	23925649	AT1TE78715	-	555	A		Chr2	2746010	2747865	AT2TE12145	+	1855	B
	Chr1	23939917	23940948	AT1TE78765	-	1031	A		Chr2	2752273	2752643	AT2TE12160	-	370	B
	Chr1	23947052	23947192	AT1TE78780	-	140	A		Chr2	2765877	2779424	AT2TE12225	-	13547	B
	Chr1	24027108	24027951	AT1TE79030	+	844	A		Chr2	2771095	2773118	AT2TE12230	+	2023	B
	Chr1	24041682	24041997	AT1TE79070	+	315	A		Chr2	2780087	2781859	AT2TE12265	+	1772	B
	Chr1	24059959	24060041	AT1TE79120	+	82	A		Chr2	2782037	2785706	AT2TE12270	+	3669	B
	Chr1	24063960	24064293	AT1TE79130	-	333	A		Chr2	2786397	2788004	AT2TE12285	-	1607	B
	Chr1	24092605	24093471	AT1TE79215	+	866	A		Chr2	2791701	2800659	AT2TE12310	+	8958	B
	Chr1	24101340	24101456	AT1TE79250	-	116	A		Chr2	2793395	2799755	AT2TE12315	+	6360	B
	Chr1	24101485	24101571	AT1TE79255	+	86	A		Chr2	2800664	2804388	AT2TE12320	+	3724	B
	Chr1	24119436	24119699	AT1TE79315	-	263	A		Chr2	2805778	2806532	AT2TE12335	+	754	B
	Chr1	24126179	24127536	AT1TE79345	-	1357	A		Chr2	2808059	2808835	AT2TE12340	-	776	B
	Chr1	24172330	24172382	AT1TE79505	+	52	A		Chr2	2811679	2813114	AT2TE12350	-	1435	B
	Chr1	24214994	24215152	AT1TE79630	+	158	A		Chr2	2813114	2813640	AT2TE12355	+	526	B
	Chr1	24223222	24223479	AT1TE79660	-	257	A		Chr2	2813640	2814137	AT2TE12360	-	497	B
	Chr1	24241062	24241693	AT1TE79720	+	631	A		Chr2	2815729	2817935	AT2TE12375	+	2206	B
	Chr1	24281393	24281480	AT1TE79835	-	87	A		Chr2	2818659	2822102	AT2TE12390	+	3443	B
	Chr1	24317403	24317613	AT1TE79940	+	210	A		Chr2	2820435	2821032	AT2TE12400	+	597	B
	Chr1	24337781	24338144	AT1TE79995	-	363	A		Chr2	2822416	2823049	AT2TE12405	+	633	B
	Chr1	24350740	24352986	AT1TE80035	+	2246	A		Chr2	2823238	2823697	AT2TE12410	-	459	B
	Chr1	24360686	24360979	AT1TE80055	-	293	A		Chr2	2824393	2825266	AT2TE12415	+	873	B
	Chr1	24428899	24429318	AT1TE80250	+	419	A		Chr2	2827403	2831332	AT2TE12425	+	3929	B
	Chr1	24467556	24468241	AT1TE80350	+	685	A		Chr2	2832362	2833661	AT2TE12435	+	1299	B
	Chr1	24483165	24483456	AT1TE80400	-	291	A		Chr2	2836957	2838292	AT2TE12445	+	1335	B
	Chr1	24484053	24484762	AT1TE80410	+	709	A		Chr2	2838794	2841583	AT2TE12450	+	2789	B
	Chr1	24506417	24506616	AT1TE80485	-	200	A		Chr2	2844764	2849743	AT2TE12470	-	4979	B
	Chr1	24507414	24508526	AT1TE80490	+	1112	A		Chr2	2852562	2852647	AT2TE12490	+	85	B
	Chr1	24533501	24535062	AT1TE80590	+	1561	A		Chr2	2852647	2854329	AT2TE12495	-	1682	B
	Chr1	24563337	24564237	AT1TE80680	+	900	A		Chr2	2855655	2857328	AT2TE12505	-	1673	B
	Chr1	24564237	24564712	AT1TE80685	+	475	A		Chr2	2868063	2870091	AT2TE12530	-	2028	B
	Chr1	24564712	24565614	AT1TE80690	+	902	A		Chr2	2871822	2882410	AT2TE12555	-	10588	B
	Chr1	24577177	24577413	AT1TE80725	-	236	A		Chr2	2884701	2885448	AT2TE12570	+	747	B
	Chr1	24593075	24593605	AT1TE80770	-	530	A		Chr2	2885743	2886231	AT2TE12575	+	488	B
	Chr1	24604923	24604957	AT1TE80820	-	34	A		Chr2	2886318	2886880	AT2TE12580	-	562	B
	Chr1	24604957	24605560	AT1TE80825	+	603	A		Chr2	2911654	2913291	AT2TE12700	-	1637	B
	Chr1	24645065	24646116	AT1TE80950	+	1051	A		Chr2	2913723	2914572	AT2TE12710	+	849	B
	Chr1	24675704	24676037	AT1TE81045	-	333	A		Chr2	2914577	2915088	AT2TE12715	+	511	B
	Chr1	24704986	24706028	AT1TE81150	+	1042	A		Chr2	2915354	2916148	AT2TE12725	+	794	B
	Chr1	24718477	24719103	AT1TE81195	+	627	A		Chr2	2932276	2934860	AT2TE12810	-	2584	B
	Chr1	24741045	24742542	AT1TE81275	-	1497	A		Chr2	2935656	2938180	AT2TE12815	+	2524	B
	Chr1	24744925	24745330	AT1TE81285	+	405	A		Chr2	2941106	2945799	AT2TE12825	-	4693	B
	Chr1	24776633	24776698	AT1TE81370	-	65	A		Chr2	2949964	2950818	AT2TE12840	-	854	B
	Chr1	24822382	24823214	AT1TE81525	+	832	A		Chr2	2951867	2952410	AT2TE12850	-	543	B
	Chr1	24822535	24822940	AT1TE81535	-	405	A		Chr2	2961895	2962812	AT2TE12900	-	917	B
	Chr1	24831578	24832636	AT1TE81560	+	1058	A		Chr2	2962930	2964188	AT2TE12910	+	1258	B
	Chr1	24871533	24872092	AT1TE81690	+	559	A		Chr2	2964210	2964408	AT2TE12920	-	198	B
	Chr1	24875442	24877077	AT1TE81710	-	1635	A		Chr2	2964619	2966774	AT2TE12930	+	2155	B
	Chr1	24877097	24877222	AT1TE81720	-	125	A		Chr2	2971055	2973440	AT2TE12960	+	2385	B
	Chr1	24893994	24894518	AT1TE81785	-	524	A		Chr2	2985783	2987306	AT2TE13025	+	1523	B
	Chr1	24897486	24897699	AT1TE81800	-	213	A		Chr2	2990738	2991802	AT2TE13040	-	1064	B
	Chr1	24901331	24901435	AT1TE81815	-	104	A		Chr2	2993917	2995731	AT2TE13055	+	1814	B
	Chr1	24907484	24908870	AT1TE81825	-	1386	A		Chr2	2998277	2999735	AT2TE13070	-	1458	B
	Chr1	24918426	24918569	AT1TE81855	-	143	A		Chr2	3000612	3005283	AT2TE13080	+	4671	B
	Chr1	24948087	24948353	AT1TE81950	-	266	A		Chr2	3007108	3008067	AT2TE13105	+	959	B
	Chr1	24955985	24956637	AT1TE81980	+	652	A		Chr2	3010236	3012123	AT2TE13115	+	1887	B
	Chr1	25034156	25035674	AT1TE82220	+	1518	A		Chr2	3012123	3012255	AT2TE13125	+	132	B
	Chr1	25056917	25057282	AT1TE82280	+	365	A		Chr2	3014478	3023011	AT2TE13145	+	8533	B
	Chr1	25097890	25099159	AT1TE82410	+	1269	A		Chr2	3023981	3024329	AT2TE13165	-	348	B
	Chr1	25180003	25182025	AT1TE82640	+	2022	A		Chr2	3024723	3025684	AT2TE13170	-	961	B
	Chr1	25186571	25187854	AT1TE82665	-	1283	A		Chr2	3025685	3025725	AT2TE13175	-	41	B
	Chr1	25187854	25188014	AT1TE82670	+	160	A		Chr2	3030627	3031810	AT2TE13200	-	1183	B
	Chr1	25245300	25245742	AT1TE82840	-	442	A		Chr2	3033103	3033366	AT2TE13205	-	263	B
	Chr1	25247502	25248117	AT1TE82845	-	615	A		Chr2	3034688	3035101	AT2TE13210	+	413	B
	Chr1	25247589	25247851	AT1TE82850	+	262	A		Chr2	3036101	3036399	AT2TE13215	-	298	B
	Chr1	25343348	25343969	AT1TE83175	-	621	A		Chr2	3039219	3039786	AT2TE13225	+	567	B
	Chr1	25357818	25358421	AT1TE83220	+	604	A		Chr2	3040092	3040905	AT2TE13230	+	813	B
	Chr1	25400478	25401474	AT1TE83355	-	996	A		Chr2	3040905	3041567	AT2TE13235	-	662	B
	Chr1	25565864	25566805	AT1TE83875	-	941	A		Chr2	3041987	3044868	AT2TE13245	-	2881	B
	Chr1	25581976	25583821	AT1TE83920	+	1845	A		Chr2	3057638	3057684	AT2TE13310	+	46	B
	Chr1	25594250	25594966	AT1TE83945	+	716	A		Chr2	3061228	3074307	AT2TE13335	+	13079	B
	Chr1	25613311	25613735	AT1TE84000	-	424	A		Chr2	3075734	3078570	AT2TE13350	-	2836	B
	Chr1	25696500	25698524	AT1TE84245	+	2024	A		Chr2	3079511	3083903	AT2TE13380	-	4392	B
	Chr1	25705081	25705258	AT1TE84270	+	177	A		Chr2	3083903	3089468	AT2TE13385	-	5565	B
	Chr1	25722565	25723569	AT1TE84335	+	1004	A		Chr2	3089468	3092288	AT2TE13390	-	2820	B
	Chr1	25728311	25728788	AT1TE84350	+	477	A		Chr2	3094961	3096558	AT2TE13420	+	1597	B
	Chr1	25728937	25729089	AT1TE84355	+	152	A		Chr2	3096581	3097805	AT2TE13430	-	1224	B
	Chr1	25729737	25730188	AT1TE84365	-	451	A		Chr2	3098016	3107253	AT2TE13440	+	9237	B
	Chr1	25730203	25730382	AT1TE84370	-	179	A		Chr2	3107314	3112019	AT2TE13445	-	4705	B
	Chr1	25779499	25780236	AT1TE84520	+	737	A		Chr2	3109914	3110725	AT2TE13465	+	811	B
	Chr1	25975950	25977038	AT1TE85105	-	1088	A		Chr2	3112019	3112091	AT2TE13470	+	72	B
	Chr1	26139771	26140541	AT1TE85640	-	770	A		Chr2	3113354	3114636	AT2TE13475	-	1282	B
	Chr1	26169149	26171479	AT1TE85730	-	2330	A		Chr2	3115587	3116951	AT2TE13490	+	1364	B
	Chr1	26358798	26360000	AT1TE86330	+	1202	A		Chr2	3117079	3117673	AT2TE13495	-	594	B
	Chr1	26374207	26375957	AT1TE86375	+	1750	A		Chr2	3117103	3117340	AT2TE13500	-	237	B
	Chr1	26380787	26381167	AT1TE86390	-	380	A		Chr2	3118266	3119694	AT2TE13505	-	1428	B
	Chr1	26510665	26511224	AT1TE86795	-	560	A		Chr2	3120315	3121017	AT2TE13510	+	702	B
	Chr1	26551491	26552205	AT1TE86940	+	714	A		Chr2	3121017	3121461	AT2TE13515	+	444	B
	Chr1	26650760	26650921	AT1TE87255	-	161	A		Chr2	3121464	3131230	AT2TE13520	+	9766	B
	Chr1	26779007	26781652	AT1TE87630	-	2645	A		Chr2	3131278	3132263	AT2TE13525	+	985	B
	Chr1	26880168	26880722	AT1TE87965	-	554	A		Chr2	3132841	3132902	AT2TE13535	+	61	B
	Chr1	26880722	26881419	AT1TE87970	+	697	A		Chr2	3135154	3136156	AT2TE13545	+	1002	B
	Chr1	26881419	26881512	AT1TE87975	-	93	A		Chr2	3136156	3136590	AT2TE13550	+	434	B
	Chr1	27035223	27036301	AT1TE88450	-	1078	A		Chr2	3137335	3138760	AT2TE13560	-	1425	B
	Chr1	27117490	27118195	AT1TE88730	-	705	A		Chr2	3138824	3139273	AT2TE13565	-	449	B
	Chr1	27186754	27187321	AT1TE88955	-	567	A		Chr2	3139307	3140895	AT2TE13570	-	1588	B
	Chr1	27240714	27241286	AT1TE89135	+	573	A		Chr2	3143092	3144613	AT2TE13585	-	1521	B
	Chr1	27428714	27429293	AT1TE89750	-	579	A		Chr2	3145310	3147937	AT2TE13595	+	2627	B
	Chr1	27440620	27440798	AT1TE89780	+	178	A		Chr2	3150102	3150516	AT2TE13615	-	414	B
	Chr1	27556156	27556325	AT1TE90170	-	169	A		Chr2	3150541	3151571	AT2TE13620	-	1030	B
	Chr1	27597411	27597674	AT1TE90305	+	263	A		Chr2	3152157	3154869	AT2TE13635	-	2712	B
	Chr1	27603351	27603513	AT1TE90315	-	162	A		Chr2	3154927	3155520	AT2TE13645	-	593	B
	Chr1	27859647	27860967	AT1TE91165	+	1320	A		Chr2	3155663	3156897	AT2TE13655	-	1234	B
	Chr1	28051401	28051657	AT1TE91790	+	256	A		Chr2	3156897	3157395	AT2TE13660	-	498	B
	Chr1	28311272	28312504	AT1TE92655	-	1232	A		Chr2	3157543	3159478	AT2TE13670	-	1935	B
	Chr1	28312504	28312633	AT1TE92660	-	129	A		Chr2	3160552	3166309	AT2TE13685	-	5757	B
	Chr1	28332971	28334063	AT1TE92725	-	1092	A		Chr2	3174359	3175057	AT2TE13730	-	698	B
	Chr1	28397479	28397666	AT1TE92900	+	187	A		Chr2	3175489	3178727	AT2TE13735	+	3238	B
	Chr1	28398200	28399052	AT1TE92905	-	852	A		Chr2	3180168	3180824	AT2TE13745	+	656	B
	Chr1	28420783	28421844	AT1TE92970	+	1062	A		Chr2	3180825	3183686	AT2TE13750	-	2861	B
	Chr1	28520026	28520136	AT1TE93285	-	110	A		Chr2	3183721	3186659	AT2TE13755	+	2938	B
	Chr1	28520136	28521012	AT1TE93290	+	876	A		Chr2	3187501	3187850	AT2TE13760	+	349	B
	Chr1	28522006	28522718	AT1TE93300	-	712	A		Chr2	3189785	3189903	AT2TE13765	-	118	B
	Chr1	28581356	28582297	AT1TE93510	+	941	A		Chr2	3189903	3191105	AT2TE13770	-	1202	B
	Chr1	28703054	28703305	AT1TE93910	+	251	A		Chr2	3191105	3191787	AT2TE13775	-	682	B
	Chr1	28703305	28704766	AT1TE93915	+	1461	A		Chr2	3192021	3192234	AT2TE13785	+	213	B
	Chr1	28788492	28789862	AT1TE94200	-	1370	A		Chr2	3192234	3192432	AT2TE13790	+	198	B
	Chr1	28827348	28829167	AT1TE94305	+	1820	A		Chr2	3195999	3197374	AT2TE13805	+	1375	B
	Chr1	28912663	28913670	AT1TE94570	-	1007	A		Chr2	3200281	3200475	AT2TE13825	-	194	B
	Chr1	28935707	28936420	AT1TE94640	+	713	A		Chr2	3200475	3201138	AT2TE13830	-	663	B
	Chr1	28964187	28964630	AT1TE94730	-	443	A		Chr2	3201138	3203097	AT2TE13835	-	1959	B
	Chr1	28994619	28994720	AT1TE94830	+	102	A		Chr2	3203107	3203705	AT2TE13840	-	598	B
	Chr1	29078380	29079012	AT1TE95100	+	632	A		Chr2	3203756	3205871	AT2TE13850	-	2115	B
	Chr1	29125353	29125901	AT1TE95255	+	548	A		Chr2	3205871	3206171	AT2TE13855	-	300	B
	Chr1	29244136	29244718	AT1TE95675	+	582	A		Chr2	3209190	3211000	AT2TE13870	-	1810	B
	Chr1	29263870	29264177	AT1TE95740	+	307	A		Chr2	3211000	3211382	AT2TE13875	-	382	B
	Chr1	29319210	29319629	AT1TE95910	+	419	A		Chr2	3214484	3215081	AT2TE13915	+	597	B
	Chr1	29319629	29320701	AT1TE95915	-	1072	A		Chr2	3215634	3216758	AT2TE13925	+	1124	B
	Chr1	29468578	29470238	AT1TE96405	+	1660	A		Chr2	3216759	3217143	AT2TE13930	-	384	B
	Chr1	29578070	29578609	AT1TE96750	+	539	A		Chr2	3222765	3233780	AT2TE13950	-	11015	B
	Chr1	29611561	29611719	AT1TE96850	+	158	A		Chr2	3225682	3230917	AT2TE13955	-	5235	B
	Chr1	29611749	29612226	AT1TE96855	-	477	A		Chr2	3234485	3237360	AT2TE13970	-	2875	B
	Chr1	29612247	29612406	AT1TE96860	+	159	A		Chr2	3294467	3295763	AT2TE14255	-	1296	B
	Chr1	29983276	29984079	AT1TE98060	+	803	A		Chr2	3301612	3301801	AT2TE14280	+	189	B
	Chr1	29984079	29984291	AT1TE98065	-	212	A		Chr2	3301801	3303203	AT2TE14285	+	1402	B
	Chr1	29984291	29984380	AT1TE98070	-	89	A		Chr2	3307693	3307913	AT2TE14310	-	220	B
	Chr1	29984484	29984711	AT1TE98075	-	227	A		Chr2	3307993	3308107	AT2TE14315	+	114	B
	Chr1	30068689	30069495	AT1TE98340	-	806	A		Chr2	3308219	3308973	AT2TE14320	+	754	B
	Chr1	30250977	30253348	AT1TE98910	-	2371	A		Chr2	3308979	3309015	AT2TE14325	-	36	B
	Chr1	30253349	30253650	AT1TE98915	-	302	A		Chr2	3309015	3311366	AT2TE14330	-	2351	B
	Chr2	49859	50285	AT2TE00085	-	426	A		Chr2	3318352	3318625	AT2TE14370	-	273	B
	Chr2	69925	70795	AT2TE00130	+	870	A		Chr2	3344499	3344789	AT2TE14495	-	290	B
	Chr2	71802	72196	AT2TE00145	-	394	A		Chr2	3344834	3345276	AT2TE14500	-	442	B
	Chr2	72649	72805	AT2TE00155	-	156	A		Chr2	3355563	3356654	AT2TE14555	-	1091	B
	Chr2	126920	128152	AT2TE00425	+	1232	A		Chr2	3379193	3379763	AT2TE14665	-	570	B
	Chr2	138751	139009	AT2TE00480	-	258	A		Chr2	3438370	3438428	AT2TE14960	-	58	B
	Chr2	152015	152232	AT2TE00535	+	217	A		Chr2	3459139	3460112	AT2TE15045	-	973	B
	Chr2	179754	180043	AT2TE00670	+	289	A		Chr2	3479648	3480558	AT2TE15150	-	910	B
	Chr2	187244	187484	AT2TE00710	-	240	A		Chr2	3481084	3482066	AT2TE15155	-	982	B
	Chr2	192070	192516	AT2TE00730	-	446	A		Chr2	3512581	3512736	AT2TE15315	+	155	B
	Chr2	204538	204686	AT2TE00795	-	148	A		Chr2	3528628	3530340	AT2TE15385	+	1712	B
	Chr2	215550	216683	AT2TE00850	+	1133	A		Chr2	3531974	3532287	AT2TE15400	-	313	B
	Chr2	238124	238646	AT2TE00965	+	522	A		Chr2	3533345	3539334	AT2TE15415	+	5989	B
	Chr2	240846	241949	AT2TE00985	+	1103	A		Chr2	3539390	3540227	AT2TE15425	-	837	B
	Chr2	254204	254342	AT2TE01030	+	138	A		Chr2	3541818	3545190	AT2TE15440	+	3372	B
	Chr2	254342	255444	AT2TE01035	-	1102	A		Chr2	3545245	3545748	AT2TE15450	+	503	B
	Chr2	266135	266435	AT2TE01075	-	300	A		Chr2	3546592	3546828	AT2TE15470	-	236	B
	Chr2	267907	268041	AT2TE01085	-	134	A		Chr2	3547953	3552491	AT2TE15490	-	4538	B
	Chr2	275808	275985	AT2TE01120	-	177	A		Chr2	3552888	3554461	AT2TE15495	-	1573	B
	Chr2	292730	293916	AT2TE01205	+	1186	A		Chr2	3554461	3556283	AT2TE15500	+	1822	B
	Chr2	303115	303588	AT2TE01265	+	473	A		Chr2	3556317	3558079	AT2TE15510	+	1762	B
	Chr2	305723	306044	AT2TE01275	+	321	A		Chr2	3558187	3559719	AT2TE15520	-	1532	B
	Chr2	314626	315282	AT2TE01315	-	656	A		Chr2	3559719	3561359	AT2TE15525	-	1640	B
	Chr2	323996	324323	AT2TE01350	+	327	A		Chr2	3563125	3563195	AT2TE15555	+	70	B
	Chr2	346936	347036	AT2TE01450	-	100	A		Chr2	3563211	3566075	AT2TE15560	+	2864	B
	Chr2	350314	350748	AT2TE01460	-	434	A		Chr2	3566076	3571742	AT2TE15565	-	5666	B
	Chr2	351666	352117	AT2TE01465	-	451	A		Chr2	3570253	3570527	AT2TE15570	-	274	B
	Chr2	368355	368592	AT2TE01530	+	237	A		Chr2	3570529	3570631	AT2TE15575	-	102	B
	Chr2	379375	379539	AT2TE01570	-	164	A		Chr2	3571777	3572919	AT2TE15580	+	1142	B
	Chr2	393577	396843	AT2TE01630	-	3266	A		Chr2	3572919	3573118	AT2TE15585	-	199	B
	Chr2	401157	402774	AT2TE01665	+	1617	A		Chr2	3573423	3575224	AT2TE15590	+	1801	B
	Chr2	421013	421540	AT2TE01760	+	527	A		Chr2	3580464	3582108	AT2TE15630	+	1644	B
	Chr2	422972	423151	AT2TE01765	+	179	A		Chr2	3586372	3594041	AT2TE15655	-	7669	B
	Chr2	424813	424935	AT2TE01770	+	122	A		Chr2	3595722	3597855	AT2TE15660	-	2133	B
	Chr2	429196	429343	AT2TE01790	+	147	A		Chr2	3598055	3598805	AT2TE15665	+	750	B
	Chr2	440426	440595	AT2TE01850	-	169	A		Chr2	3600150	3601950	AT2TE15675	-	1800	B
	Chr2	510652	511831	AT2TE02190	-	1179	A		Chr2	3636369	3645326	AT2TE15880	-	8957	B
	Chr2	542270	544756	AT2TE02335	+	2486	A		Chr2	3649767	3650108	AT2TE15900	-	341	B
	Chr2	560179	560448	AT2TE02430	-	269	A		Chr2	3652585	3655719	AT2TE15920	-	3134	B
	Chr2	566713	566756	AT2TE02460	+	43	A		Chr2	3655719	3658240	AT2TE15925	-	2521	B
	Chr2	582618	583282	AT2TE02475	+	664	A		Chr2	3664936	3665626	AT2TE15965	+	690	B
	Chr2	600703	600756	AT2TE02540	+	53	A		Chr2	3676269	3680275	AT2TE15995	-	4006	B
	Chr2	603502	603585	AT2TE02555	+	83	A		Chr2	3676755	3678366	AT2TE16000	+	1611	B
	Chr2	612657	612921	AT2TE02595	-	264	A		Chr2	3680275	3681190	AT2TE16005	+	915	B
	Chr2	623460	623853	AT2TE02650	-	393	A		Chr2	3681190	3684152	AT2TE16010	-	2962	B
	Chr2	625442	626028	AT2TE02660	-	586	A		Chr2	3684248	3684831	AT2TE16015	-	583	B
	Chr2	626028	626486	AT2TE02665	-	458	A		Chr2	3687123	3692178	AT2TE16030	-	5055	B
	Chr2	631072	631344	AT2TE02680	+	272	A		Chr2	3702911	3703046	AT2TE16080	-	135	B
	Chr2	636878	637401	AT2TE02710	-	523	A		Chr2	3705806	3706431	AT2TE16090	-	625	B
	Chr2	639439	639520	AT2TE02720	-	81	A		Chr2	3708959	3710191	AT2TE16100	-	1232	B
	Chr2	639520	640379	AT2TE02725	+	859	A		Chr2	3720205	3721518	AT2TE16145	+	1313	B
	Chr2	675551	676681	AT2TE02910	+	1130	A		Chr2	3728280	3728610	AT2TE16175	-	330	B
	Chr2	704300	704695	AT2TE03040	-	395	A		Chr2	3728861	3731260	AT2TE16180	-	2399	B
	Chr2	707022	710196	AT2TE03055	+	3174	A		Chr2	3731280	3740503	AT2TE16190	+	9223	B
	Chr2	708840	709399	AT2TE03060	+	559	A		Chr2	3740943	3742095	AT2TE16215	-	1152	B
	Chr2	713305	713789	AT2TE03075	-	484	A		Chr2	3742095	3749364	AT2TE16220	-	7269	B
	Chr2	714782	715390	AT2TE03095	-	609	A		Chr2	3749367	3750177	AT2TE16225	-	810	B
	Chr2	715390	716942	AT2TE03100	-	1552	A		Chr2	3750177	3766283	AT2TE16230	-	16106	B
	Chr2	721013	722126	AT2TE03130	+	1113	A		Chr2	3752535	3763203	AT2TE16235	-	10668	B
	Chr2	736574	737445	AT2TE03205	-	871	A		Chr2	3766283	3766910	AT2TE16245	-	627	B
	Chr2	741781	742363	AT2TE03240	-	582	A		Chr2	3767233	3770915	AT2TE16255	-	3682	B
	Chr2	743962	744665	AT2TE03250	+	703	A		Chr2	3770915	3770956	AT2TE16260	-	41	B
	Chr2	754358	754596	AT2TE03290	+	238	A		Chr2	3770956	3773386	AT2TE16265	-	2430	B
	Chr2	755083	755411	AT2TE03295	-	328	A		Chr2	3773391	3779884	AT2TE16270	-	6493	B
	Chr2	755500	755787	AT2TE03300	+	287	A		Chr2	3785519	3794054	AT2TE16310	-	8535	B
	Chr2	762465	762603	AT2TE03340	-	138	A		Chr2	3795196	3796200	AT2TE16315	-	1004	B
	Chr2	768258	768473	AT2TE03375	+	215	A		Chr2	3796607	3796789	AT2TE16325	+	182	B
	Chr2	808173	808354	AT2TE03560	+	181	A		Chr2	3799776	3803531	AT2TE16340	-	3755	B
	Chr2	808410	809054	AT2TE03565	+	644	A		Chr2	3804225	3808133	AT2TE16365	-	3908	B
	Chr2	825444	825986	AT2TE03635	+	542	A		Chr2	3808136	3809217	AT2TE16385	-	1081	B
	Chr2	825986	826273	AT2TE03640	+	287	A		Chr2	3809217	3812552	AT2TE16390	-	3335	B
	Chr2	870815	871058	AT2TE03870	+	243	A		Chr2	3813106	3813813	AT2TE16395	-	707	B
	Chr2	871078	873128	AT2TE03875	-	2050	A		Chr2	3813824	3815597	AT2TE16400	-	1773	B
	Chr2	886379	887438	AT2TE03965	+	1059	A		Chr2	3816061	3817016	AT2TE16415	-	955	B
	Chr2	888776	888895	AT2TE03975	-	119	A		Chr2	3817016	3818989	AT2TE16420	-	1973	B
	Chr2	893849	894388	AT2TE04000	-	539	A		Chr2	3819848	3820355	AT2TE16430	+	507	B
	Chr2	894484	895595	AT2TE04005	-	1111	A		Chr2	3820355	3820574	AT2TE16435	-	219	B
	Chr2	896355	897324	AT2TE04010	-	969	A		Chr2	3820574	3821095	AT2TE16440	-	521	B
	Chr2	897325	897348	AT2TE04015	+	24	A		Chr2	3821227	3823532	AT2TE16445	-	2305	B
	Chr2	898656	898809	AT2TE04030	-	153	A		Chr2	3823959	3825125	AT2TE16455	+	1166	B
	Chr2	904625	904656	AT2TE04065	-	31	A		Chr2	3826213	3827838	AT2TE16470	+	1625	B
	Chr2	919814	920007	AT2TE04110	-	193	A		Chr2	3827838	3832085	AT2TE16475	+	4247	B
	Chr2	926130	929956	AT2TE04130	-	3826	A		Chr2	3832852	3835797	AT2TE16485	-	2945	B
	Chr2	932415	932540	AT2TE04140	-	125	A		Chr2	3832864	3833932	AT2TE16490	-	1068	B
	Chr2	933516	933803	AT2TE04155	-	287	A		Chr2	3835797	3835867	AT2TE16495	-	70	B
	Chr2	934042	934254	AT2TE04160	-	212	A		Chr2	3836125	3837892	AT2TE16500	-	1767	B
	Chr2	979859	980818	AT2TE04385	-	959	A		Chr2	3837023	3837880	AT2TE16505	-	857	B
	Chr2	990831	991006	AT2TE04430	+	176	A		Chr2	3837880	3842825	AT2TE16510	+	4945	B
	Chr2	993232	993503	AT2TE04440	+	271	A		Chr2	3842886	3843441	AT2TE16520	-	555	B
	Chr2	998622	999137	AT2TE04470	+	515	A		Chr2	3844437	3845315	AT2TE16525	+	878	B
	Chr2	1010608	1011039	AT2TE04520	-	431	A		Chr2	3845315	3852606	AT2TE16530	-	7291	B
	Chr2	1011232	1012992	AT2TE04525	-	1760	A		Chr2	3854065	3854811	AT2TE16540	-	746	B
	Chr2	1018858	1019085	AT2TE04545	-	227	A		Chr2	3854811	3858388	AT2TE16545	-	3577	B
	Chr2	1037743	1038911	AT2TE04630	-	1169	A		Chr2	3858388	3859010	AT2TE16550	-	622	B
	Chr2	1048320	1049410	AT2TE04675	-	1090	A		Chr2	3859318	3862946	AT2TE16560	-	3628	B
	Chr2	1075061	1075557	AT2TE04815	+	496	A		Chr2	3863316	3865228	AT2TE16570	-	1912	B
	Chr2	1075557	1076405	AT2TE04820	-	848	A		Chr2	3865228	3875676	AT2TE16575	-	10448	B
	Chr2	1078822	1079016	AT2TE04840	+	195	A		Chr2	3875678	3879089	AT2TE16580	-	3411	B
	Chr2	1083518	1085478	AT2TE04865	-	1960	A		Chr2	3876711	3878306	AT2TE16585	-	1595	B
	Chr2	1085931	1086588	AT2TE04875	-	657	A		Chr2	3879089	3882525	AT2TE16595	-	3436	B
	Chr2	1086753	1086980	AT2TE04885	-	227	A		Chr2	3882537	3884137	AT2TE16600	-	1600	B
	Chr2	1110025	1110383	AT2TE05010	-	358	A		Chr2	3884138	3888503	AT2TE16605	-	4365	B
	Chr2	1111382	1111755	AT2TE05015	-	373	A		Chr2	3888503	3888839	AT2TE16610	+	336	B
	Chr2	1111756	1111809	AT2TE05020	+	54	A		Chr2	3889208	3890270	AT2TE16615	+	1062	B
	Chr2	1111809	1112230	AT2TE05025	+	421	A		Chr2	3890270	3895938	AT2TE16620	-	5668	B
	Chr2	1112952	1113888	AT2TE05030	+	936	A		Chr2	3895938	3896689	AT2TE16625	-	751	B
	Chr2	1123883	1124103	AT2TE05080	-	220	A		Chr2	3898038	3900548	AT2TE16635	+	2510	B
	Chr2	1125662	1127612	AT2TE05095	-	1950	A		Chr2	3900548	3902230	AT2TE16645	-	1682	B
	Chr2	1135135	1135476	AT2TE05140	+	341	A		Chr2	3902686	3903643	AT2TE16650	+	957	B
	Chr2	1154663	1155913	AT2TE05230	+	1250	A		Chr2	3903683	3913850	AT2TE16660	+	10167	B
	Chr2	1160256	1160535	AT2TE05245	-	279	A		Chr2	3906168	3907788	AT2TE16665	-	1620	B
	Chr2	1170282	1170500	AT2TE05290	+	218	A		Chr2	3913850	3913999	AT2TE16690	+	149	B
	Chr2	1172689	1172842	AT2TE05300	+	153	A		Chr2	3914161	3916406	AT2TE16695	+	2245	B
	Chr2	1177850	1178780	AT2TE05320	+	930	A		Chr2	3916406	3916678	AT2TE16700	+	272	B
	Chr2	1190723	1191098	AT2TE05380	-	375	A		Chr2	3916678	3919159	AT2TE16705	+	2481	B
	Chr2	1193939	1194608	AT2TE05395	+	669	A		Chr2	3919161	3922206	AT2TE16710	+	3045	B
	Chr2	1206971	1207472	AT2TE05430	+	501	A		Chr2	3922474	3925831	AT2TE16725	+	3357	B
	Chr2	1211812	1212437	AT2TE05460	+	625	A		Chr2	3928136	3928727	AT2TE16740	+	591	B
	Chr2	1232665	1233185	AT2TE05545	-	520	A		Chr2	3929912	3930523	AT2TE16745	+	611	B
	Chr2	1240984	1243325	AT2TE05605	+	2341	A		Chr2	3932093	3932462	AT2TE16750	-	369	B
	Chr2	1244585	1245277	AT2TE05630	+	692	A		Chr2	3933267	3933380	AT2TE16755	-	113	B
	Chr2	1256920	1257815	AT2TE05700	-	895	A		Chr2	3934295	3934858	AT2TE16760	-	563	B
	Chr2	1258312	1258968	AT2TE05710	+	656	A		Chr2	3934904	3935164	AT2TE16765	+	260	B
	Chr2	1259836	1260401	AT2TE05720	+	565	A		Chr2	3935586	3936567	AT2TE16775	+	981	B
	Chr2	1263842	1264176	AT2TE05750	-	334	A		Chr2	3938407	3938890	AT2TE16780	-	483	B
	Chr2	1271981	1272231	AT2TE05760	-	250	A		Chr2	3942750	3962834	AT2TE16800	-	20084	B
	Chr2	1277997	1278286	AT2TE05785	-	289	A		Chr2	3944665	3945905	AT2TE16805	+	1240	B
	Chr2	1280868	1281521	AT2TE05800	-	653	A		Chr2	3946037	3948281	AT2TE16815	+	2244	B
	Chr2	1318462	1318691	AT2TE06005	+	230	A		Chr2	3948281	3949277	AT2TE16820	+	996	B
	Chr2	1321646	1325404	AT2TE06025	+	3758	A		Chr2	3949277	3956452	AT2TE16825	+	7175	B
	Chr2	1333057	1333118	AT2TE06055	-	61	A		Chr2	3956455	3956852	AT2TE16830	+	397	B
	Chr2	1346331	1346627	AT2TE06130	-	296	A		Chr2	3956852	3959397	AT2TE16835	+	2545	B
	Chr2	1351878	1352499	AT2TE06165	-	621	A		Chr2	3962834	3963502	AT2TE16845	+	668	B
	Chr2	1359728	1360147	AT2TE06200	+	419	A		Chr2	3963519	3965120	AT2TE16850	-	1601	B
	Chr2	1366922	1368666	AT2TE06235	-	1744	A		Chr2	3965156	3966273	AT2TE16860	-	1117	B
	Chr2	1370787	1371826	AT2TE06255	-	1039	A		Chr2	3966273	3973249	AT2TE16865	-	6976	B
	Chr2	1372544	1373218	AT2TE06275	-	674	A		Chr2	3973249	3975620	AT2TE16885	+	2371	B
	Chr2	1380606	1381291	AT2TE06330	-	686	A		Chr2	3975743	3977958	AT2TE16890	+	2215	B
	Chr2	1393901	1395151	AT2TE06395	+	1250	A		Chr2	3977963	3980063	AT2TE16895	-	2100	B
	Chr2	1403862	1404635	AT2TE06420	+	774	A		Chr2	3980063	3980996	AT2TE16900	-	933	B
	Chr2	1409588	1409691	AT2TE06445	+	103	A		Chr2	3981129	3984836	AT2TE16910	-	3707	B
	Chr2	1409691	1410522	AT2TE06450	+	831	A		Chr2	3982323	3983352	AT2TE16915	+	1029	B
	Chr2	1412403	1413298	AT2TE06470	+	895	A		Chr2	3984907	3985066	AT2TE16920	-	159	B
	Chr2	1413343	1413623	AT2TE06480	+	280	A		Chr2	3986484	4005114	AT2TE16930	-	18630	B
	Chr2	1413820	1414493	AT2TE06490	-	673	A		Chr2	4005635	4007377	AT2TE16940	+	1742	B
	Chr2	1426102	1426445	AT2TE06555	+	343	A		Chr2	4018205	4019393	AT2TE17010	-	1188	B
	Chr2	1428553	1429356	AT2TE06565	+	803	A		Chr2	4018270	4018761	AT2TE17015	+	491	B
	Chr2	1441856	1442963	AT2TE06660	+	1107	A		Chr2	4022986	4023317	AT2TE17055	+	331	B
	Chr2	1444123	1444870	AT2TE06680	-	747	A		Chr2	4025414	4025966	AT2TE17075	+	552	B
	Chr2	1457070	1458341	AT2TE06745	+	1271	A		Chr2	4027023	4045789	AT2TE17095	+	18766	B
	Chr2	1458341	1461262	AT2TE06750	-	2921	A		Chr2	4035771	4044425	AT2TE17110	+	8654	B
	Chr2	1458648	1459165	AT2TE06755	+	517	A		Chr2	4045795	4047602	AT2TE17115	-	1807	B
	Chr2	1459165	1459213	AT2TE06760	+	48	A		Chr2	4050151	4059366	AT2TE17145	+	9215	B
	Chr2	1459213	1459811	AT2TE06765	+	598	A		Chr2	4056000	4057620	AT2TE17155	-	1620	B
	Chr2	1461262	1461488	AT2TE06770	+	226	A		Chr2	4070545	4071105	AT2TE17195	+	560	B
	Chr2	1464640	1465329	AT2TE06785	+	689	A		Chr2	4077881	4079717	AT2TE17230	-	1836	B
	Chr2	1465607	1465773	AT2TE06790	-	166	A		Chr2	4080825	4082563	AT2TE17245	-	1738	B
	Chr2	1466771	1466951	AT2TE06795	-	180	A		Chr2	4084297	4086823	AT2TE17275	-	2526	B
	Chr2	1482182	1482974	AT2TE06865	+	792	A		Chr2	4086823	4087456	AT2TE17280	-	633	B
	Chr2	1482989	1483713	AT2TE06870	-	724	A		Chr2	4091289	4093895	AT2TE17305	-	2606	B
	Chr2	1484109	1484259	AT2TE06875	+	151	A		Chr2	4099089	4100423	AT2TE17330	+	1335	B
	Chr2	1484259	1485438	AT2TE06880	+	1179	A		Chr2	4101077	4102741	AT2TE17335	-	1664	B
	Chr2	1498931	1499393	AT2TE06930	+	462	A		Chr2	4105060	4105106	AT2TE17350	-	46	B
	Chr2	1500804	1501182	AT2TE06940	-	378	A		Chr2	4110946	4115695	AT2TE17380	+	4749	B
	Chr2	1503833	1505066	AT2TE06950	+	1233	A		Chr2	4116032	4120742	AT2TE17390	+	4710	B
	Chr2	1522002	1522716	AT2TE06995	+	714	A		Chr2	4122247	4126434	AT2TE17405	-	4187	B
	Chr2	1523050	1523447	AT2TE07000	+	397	A		Chr2	4126641	4129340	AT2TE17420	-	2699	B
	Chr2	1523783	1524096	AT2TE07005	-	313	A		Chr2	4130633	4132419	AT2TE17425	-	1786	B
	Chr2	1545824	1546014	AT2TE07120	-	191	A		Chr2	4132446	4134061	AT2TE17430	-	1615	B
	Chr2	1546014	1546532	AT2TE07125	+	518	A		Chr2	4134107	4134696	AT2TE17440	+	589	B
	Chr2	1546532	1546872	AT2TE07130	-	340	A		Chr2	4135422	4137080	AT2TE17455	+	1658	B
	Chr2	1547327	1547621	AT2TE07140	+	294	A		Chr2	4137500	4139254	AT2TE17485	-	1754	B
	Chr2	1547660	1552033	AT2TE07145	-	4373	A		Chr2	4139712	4140977	AT2TE17490	+	1265	B
	Chr2	1552057	1552873	AT2TE07155	-	816	A		Chr2	4146335	4146664	AT2TE17530	-	329	B
	Chr2	1552873	1553647	AT2TE07160	-	774	A		Chr2	4146664	4148108	AT2TE17535	+	1444	B
	Chr2	1564986	1566207	AT2TE07190	-	1221	A		Chr2	4149395	4153427	AT2TE17565	-	4032	B
	Chr2	1567246	1567430	AT2TE07195	-	184	A		Chr2	4153427	4155437	AT2TE17570	+	2010	B
	Chr2	1572435	1572659	AT2TE07220	-	224	A		Chr2	4155665	4157504	AT2TE17580	+	1839	B
	Chr2	1572659	1573502	AT2TE07225	-	843	A		Chr2	4157507	4159309	AT2TE17585	+	1802	B
	Chr2	1579075	1579435	AT2TE07270	+	360	A		Chr2	4159309	4161049	AT2TE17590	-	1740	B
	Chr2	1580002	1581490	AT2TE07280	-	1488	A		Chr2	4161050	4162304	AT2TE17595	-	1254	B
	Chr2	1580202	1581256	AT2TE07285	+	1054	A		Chr2	4162310	4169555	AT2TE17600	+	7245	B
	Chr2	1584872	1585622	AT2TE07295	+	750	A		Chr2	4170811	4173975	AT2TE17610	-	3164	B
	Chr2	1587375	1587642	AT2TE07300	+	267	A		Chr2	4174051	4175324	AT2TE17620	-	1273	B
	Chr2	1592950	1593214	AT2TE07330	+	264	A		Chr2	4175504	4183067	AT2TE17625	+	7563	B
	Chr2	1593979	1594219	AT2TE07335	+	240	A		Chr2	4183673	4184976	AT2TE17640	+	1303	B
	Chr2	1596921	1597493	AT2TE07350	+	572	A		Chr2	4185504	4185811	AT2TE17650	+	307	B
	Chr2	1599599	1600791	AT2TE07380	-	1192	A		Chr2	4186049	4188832	AT2TE17655	-	2783	B
	Chr2	1602519	1602583	AT2TE07395	+	64	A		Chr2	4186080	4188815	AT2TE17660	-	2735	B
	Chr2	1607836	1609415	AT2TE07425	-	1579	A		Chr2	4188832	4189612	AT2TE17665	-	780	B
	Chr2	1613118	1613707	AT2TE07450	+	590	A		Chr2	4189730	4190374	AT2TE17675	-	644	B
	Chr2	1617960	1618260	AT2TE07475	-	300	A		Chr2	4190637	4194323	AT2TE17695	-	3686	B
	Chr2	1620457	1620833	AT2TE07495	-	376	A		Chr2	4197159	4211222	AT2TE17725	-	14063	B
	Chr2	1620833	1621464	AT2TE07500	+	631	A		Chr2	4203242	4205065	AT2TE17730	+	1823	B
	Chr2	1621464	1621654	AT2TE07505	-	190	A		Chr2	4212690	4214460	AT2TE17770	+	1770	B
	Chr2	1629433	1629539	AT2TE07540	+	107	A		Chr2	4214635	4215061	AT2TE17775	+	426	B
	Chr2	1642168	1642711	AT2TE07570	+	543	A		Chr2	4216583	4217012	AT2TE17790	-	429	B
	Chr2	1652148	1652819	AT2TE07645	+	671	A		Chr2	4217156	4218952	AT2TE17795	-	1796	B
	Chr2	1652284	1652758	AT2TE07650	-	475	A		Chr2	4224173	4224643	AT2TE17835	-	470	B
	Chr2	1653403	1653776	AT2TE07655	-	374	A		Chr2	4230742	4236512	AT2TE17870	+	5770	B
	Chr2	1656120	1656411	AT2TE07665	-	291	A		Chr2	4236656	4244403	AT2TE17875	+	7747	B
	Chr2	1665232	1668533	AT2TE07725	+	3301	A		Chr2	4246238	4249248	AT2TE17880	-	3010	B
	Chr2	1668882	1668990	AT2TE07730	-	108	A		Chr2	4249408	4250359	AT2TE17905	-	951	B
	Chr2	1669760	1670332	AT2TE07735	-	572	A		Chr2	4252038	4252659	AT2TE17920	+	621	B
	Chr2	1670332	1670443	AT2TE07740	-	111	A		Chr2	4252664	4255848	AT2TE17925	-	3184	B
	Chr2	1670443	1672763	AT2TE07745	+	2320	A		Chr2	4256383	4261370	AT2TE17935	+	4987	B
	Chr2	1676334	1676512	AT2TE07770	-	178	A		Chr2	4256625	4258322	AT2TE17940	+	1697	B
	Chr2	1678418	1679012	AT2TE07775	-	594	A		Chr2	4262019	4265049	AT2TE17960	-	3030	B
	Chr2	1681002	1681391	AT2TE07785	-	389	A		Chr2	4265049	4274213	AT2TE17975	+	9164	B
	Chr2	1681391	1682511	AT2TE07790	-	1120	A		Chr2	4275616	4282081	AT2TE17985	-	6465	B
	Chr2	1684820	1686097	AT2TE07805	+	1277	A		Chr2	4283215	4283925	AT2TE18000	+	710	B
	Chr2	1691138	1691343	AT2TE07840	+	206	A		Chr2	4283925	4287689	AT2TE18005	-	3764	B
	Chr2	1691343	1692561	AT2TE07845	+	1218	A		Chr2	4288452	4292852	AT2TE18015	-	4400	B
	Chr2	1701488	1702188	AT2TE07880	-	700	A		Chr2	4296222	4296358	AT2TE18030	+	136	B
	Chr2	1709583	1709801	AT2TE07925	-	218	A		Chr2	4296358	4300305	AT2TE18035	+	3947	B
	Chr2	1709802	1709978	AT2TE07930	-	177	A		Chr2	4301301	4301567	AT2TE18040	-	266	B
	Chr2	1709978	1710601	AT2TE07935	+	623	A		Chr2	4301943	4302118	AT2TE18050	+	175	B
	Chr2	1715793	1716096	AT2TE07955	+	303	A		Chr2	4305858	4306353	AT2TE18080	+	495	B
	Chr2	1716448	1716890	AT2TE07965	+	442	A		Chr2	4308877	4309521	AT2TE18100	+	645	B
	Chr2	1716643	1716853	AT2TE07970	-	211	A		Chr2	4318005	4322177	AT2TE18155	-	4172	B
	Chr2	1716890	1717261	AT2TE07975	-	371	A		Chr2	4325526	4325690	AT2TE18175	+	164	B
	Chr2	1729995	1731644	AT2TE08050	+	1649	A		Chr2	4326003	4326583	AT2TE18180	+	580	B
	Chr2	1731645	1732119	AT2TE08055	-	474	A		Chr2	4326583	4327964	AT2TE18185	-	1381	B
	Chr2	1734595	1736038	AT2TE08070	-	1443	A		Chr2	4328617	4328777	AT2TE18195	-	160	B
	Chr2	1740838	1741399	AT2TE08100	-	561	A		Chr2	4329265	4329921	AT2TE18200	-	656	B
	Chr2	1757090	1757219	AT2TE08115	-	129	A		Chr2	4330288	4330459	AT2TE18210	-	171	B
	Chr2	1757219	1757633	AT2TE08120	+	414	A		Chr2	4336397	4337750	AT2TE18240	+	1353	B
	Chr2	1774848	1775856	AT2TE08175	+	1008	A		Chr2	4338179	4339187	AT2TE18245	+	1008	B
	Chr2	1776388	1776704	AT2TE08185	-	316	A		Chr2	4340591	4341175	AT2TE18255	+	584	B
	Chr2	1777826	1777945	AT2TE08195	-	119	A		Chr2	4349966	4350094	AT2TE18285	+	128	B
	Chr2	1779099	1779402	AT2TE08205	-	303	A		Chr2	4350506	4351511	AT2TE18300	+	1005	B
	Chr2	1779402	1779805	AT2TE08210	-	403	A		Chr2	4357223	4357327	AT2TE18325	-	105	B
	Chr2	1779805	1779865	AT2TE08215	+	60	A		Chr2	4357342	4358519	AT2TE18330	-	1177	B
	Chr2	1788910	1791547	AT2TE08255	-	2637	A		Chr2	4358541	4360141	AT2TE18335	-	1600	B
	Chr2	1792479	1793634	AT2TE08265	-	1155	A		Chr2	4360162	4361509	AT2TE18345	-	1347	B
	Chr2	1797232	1797810	AT2TE08285	-	578	A		Chr2	4366762	4366862	AT2TE18370	-	100	B
	Chr2	1801736	1803472	AT2TE08300	-	1736	A		Chr2	4366862	4370201	AT2TE18375	-	3339	B
	Chr2	1821580	1821855	AT2TE08340	-	275	A		Chr2	4371540	4375322	AT2TE18385	+	3782	B
	Chr2	1824682	1827270	AT2TE08360	-	2588	A		Chr2	4379828	4381342	AT2TE18400	+	1514	B
	Chr2	1847140	1847752	AT2TE08480	+	612	A		Chr2	4381395	4397150	AT2TE18410	+	15755	B
	Chr2	1850560	1851208	AT2TE08510	-	648	A		Chr2	4385855	4394311	AT2TE18415	-	8456	B
	Chr2	1850848	1851122	AT2TE08515	+	274	A		Chr2	4397872	4398152	AT2TE18430	+	280	B
	Chr2	1856346	1856899	AT2TE08540	-	553	A		Chr2	4398156	4401873	AT2TE18435	+	3717	B
	Chr2	1862442	1865975	AT2TE08575	-	3533	A		Chr2	4398317	4400056	AT2TE18440	-	1739	B
	Chr2	1868911	1869052	AT2TE08600	+	141	A		Chr2	4402022	4404336	AT2TE18445	+	2314	B
	Chr2	1869052	1869894	AT2TE08605	-	842	A		Chr2	4404336	4407935	AT2TE18450	-	3599	B
	Chr2	1879064	1880386	AT2TE08645	+	1322	A		Chr2	4407945	4412568	AT2TE18455	-	4623	B
	Chr2	1881944	1882743	AT2TE08655	-	799	A		Chr2	4413667	4413823	AT2TE18475	-	156	B
	Chr2	1882744	1883142	AT2TE08660	-	399	A		Chr2	4422870	4425447	AT2TE18530	+	2577	B
	Chr2	1887176	1887579	AT2TE08670	-	404	A		Chr2	4425636	4428291	AT2TE18545	+	2655	B
	Chr2	1888647	1888783	AT2TE08680	-	136	A		Chr2	4428333	4428681	AT2TE18560	+	348	B
	Chr2	1889937	1890242	AT2TE08690	-	305	A		Chr2	4428707	4429211	AT2TE18570	-	504	B
	Chr2	1890242	1890698	AT2TE08695	+	456	A		Chr2	4429258	4430013	AT2TE18580	+	755	B
	Chr2	1896572	1897412	AT2TE08735	-	840	A		Chr2	4430013	4430630	AT2TE18585	+	617	B
	Chr2	1898108	1898622	AT2TE08745	+	514	A		Chr2	4430799	4430941	AT2TE18595	+	142	B
	Chr2	1929411	1930752	AT2TE08865	+	1341	A		Chr2	4430980	4434605	AT2TE18605	+	3625	B
	Chr2	1937708	1937869	AT2TE08890	+	161	A		Chr2	4434653	4434901	AT2TE18620	+	248	B
	Chr2	1943072	1943164	AT2TE08935	+	92	A		Chr2	4434901	4438078	AT2TE18625	+	3177	B
	Chr2	1947595	1949041	AT2TE08970	-	1446	A		Chr2	4438305	4439529	AT2TE18640	-	1224	B
	Chr2	1955831	1956540	AT2TE09020	-	709	A		Chr2	4439615	4439707	AT2TE18650	-	92	B
	Chr2	1956540	1956638	AT2TE09025	-	98	A		Chr2	4442068	4445835	AT2TE18665	+	3767	B
	Chr2	1962412	1963666	AT2TE09065	-	1254	A		Chr2	4452529	4457022	AT2TE18695	+	4493	B
	Chr2	1963666	1965808	AT2TE09070	+	2142	A		Chr2	4460098	4470368	AT2TE18710	+	10270	B
	Chr2	1982791	1983132	AT2TE09140	+	341	A		Chr2	4461785	4465949	AT2TE18715	+	4164	B
	Chr2	1987722	1989017	AT2TE09170	+	1295	A		Chr2	4465949	4468547	AT2TE18720	+	2598	B
	Chr2	1990559	1991386	AT2TE09190	+	827	A		Chr2	4471730	4472510	AT2TE18735	+	780	B
	Chr2	2010682	2011030	AT2TE09220	-	348	A		Chr2	4474210	4476280	AT2TE18760	+	2070	B
	Chr2	2014818	2015001	AT2TE09240	+	183	A		Chr2	4489280	4490650	AT2TE18825	+	1370	B
	Chr2	2019784	2020922	AT2TE09270	-	1138	A		Chr2	4490650	4500765	AT2TE18830	-	10115	B
	Chr2	2021015	2022558	AT2TE09280	-	1543	A		Chr2	4504053	4505918	AT2TE18860	-	1865	B
	Chr2	2024938	2025005	AT2TE09290	+	67	A		Chr2	4508416	4513686	AT2TE18875	+	5270	B
	Chr2	2030995	2032040	AT2TE09325	+	1045	A		Chr2	4511481	4512019	AT2TE18880	-	538	B
	Chr2	2034139	2035218	AT2TE09345	+	1079	A		Chr2	4513697	4517287	AT2TE18885	-	3590	B
	Chr2	2057538	2057978	AT2TE09385	-	440	A		Chr2	4517287	4518080	AT2TE18890	-	793	B
	Chr2	2065088	2066950	AT2TE09430	-	1862	A		Chr2	4518080	4522501	AT2TE18895	-	4421	B
	Chr2	2074040	2075017	AT2TE09490	+	977	A		Chr2	4522544	4524021	AT2TE18915	+	1477	B
	Chr2	2086353	2086505	AT2TE09545	-	152	A		Chr2	4525971	4535960	AT2TE18920	+	9989	B
	Chr2	2086505	2086979	AT2TE09550	+	474	A		Chr2	4535961	4536173	AT2TE18925	+	212	B
	Chr2	2121885	2129089	AT2TE09685	-	7204	A		Chr2	4536650	4538819	AT2TE18935	+	2169	B
	Chr2	2137646	2138076	AT2TE09745	+	430	A		Chr2	4538820	4540514	AT2TE18940	+	1694	B
	Chr2	2138396	2139390	AT2TE09760	+	994	A		Chr2	4541674	4542380	AT2TE18945	+	706	B
	Chr2	2140023	2140750	AT2TE09785	-	727	A		Chr2	4545527	4547505	AT2TE18965	+	1978	B
	Chr2	2140750	2141033	AT2TE09790	-	283	A		Chr2	4547737	4558525	AT2TE18975	+	10788	B
	Chr2	2148928	2149082	AT2TE09840	+	154	A		Chr2	4558525	4566131	AT2TE18980	-	7606	B
	Chr2	2149945	2150864	AT2TE09865	+	919	A		Chr2	4566141	4566581	AT2TE18985	+	440	B
	Chr2	2160399	2160442	AT2TE09920	+	43	A		Chr2	4570280	4583000	AT2TE19005	-	12720	B
	Chr2	2162294	2162937	AT2TE09950	-	643	A		Chr2	4583071	4584177	AT2TE19010	+	1106	B
	Chr2	2174242	2174522	AT2TE10000	-	280	A		Chr2	4584958	4585887	AT2TE19020	-	929	B
	Chr2	2174522	2177129	AT2TE10005	-	2607	A		Chr2	4585887	4589538	AT2TE19025	+	3651	B
	Chr2	2177129	2177749	AT2TE10010	+	620	A		Chr2	4589568	4590885	AT2TE19035	-	1317	B
	Chr2	2178033	2178820	AT2TE10025	+	787	A		Chr2	4593646	4598857	AT2TE19055	-	5211	B
	Chr2	2187309	2188592	AT2TE10075	-	1283	A		Chr2	4595985	4597826	AT2TE19065	+	1841	B
	Chr2	2191056	2191575	AT2TE10085	+	519	A		Chr2	4598864	4609295	AT2TE19070	-	10431	B
	Chr2	2191575	2192438	AT2TE10090	-	863	A		Chr2	4604976	4607996	AT2TE19075	+	3020	B
	Chr2	2195657	2195907	AT2TE10110	-	250	A		Chr2	4609334	4609541	AT2TE19085	-	207	B
	Chr2	2195961	2196827	AT2TE10115	-	866	A		Chr2	4609630	4610317	AT2TE19095	-	687	B
	Chr2	2197121	2198179	AT2TE10130	-	1058	A		Chr2	4610348	4610646	AT2TE19105	-	298	B
	Chr2	2209831	2210864	AT2TE10190	-	1033	A		Chr2	4610646	4615454	AT2TE19110	-	4808	B
	Chr2	2211062	2212136	AT2TE10200	-	1074	A		Chr2	4615799	4617477	AT2TE19120	+	1678	B
	Chr2	2212142	2212236	AT2TE10205	-	94	A		Chr2	4623544	4624517	AT2TE19160	+	973	B
	Chr2	2212826	2213371	AT2TE10210	+	545	A		Chr2	4624741	4626159	AT2TE19175	+	1418	B
	Chr2	2213851	2214261	AT2TE10215	+	410	A		Chr2	4626895	4631843	AT2TE19200	-	4948	B
	Chr2	2217272	2217386	AT2TE10225	+	114	A		Chr2	4635951	4641165	AT2TE19240	-	5214	B
	Chr2	2232386	2233113	AT2TE10330	-	727	A		Chr2	4644471	4645636	AT2TE19275	+	1165	B
	Chr2	2233114	2233258	AT2TE10335	+	145	A		Chr2	4650263	4650556	AT2TE19310	+	293	B
	Chr2	2236526	2240579	AT2TE10355	-	4053	A		Chr2	4656356	4658311	AT2TE19355	+	1955	B
	Chr2	2245929	2246168	AT2TE10380	-	239	A		Chr2	4662890	4663657	AT2TE19375	+	767	B
	Chr2	2256117	2256605	AT2TE10395	-	488	A		Chr2	4668660	4668843	AT2TE19395	+	183	B
	Chr2	2260685	2261026	AT2TE10410	-	341	A		Chr2	4668851	4675676	AT2TE19400	+	6825	B
	Chr2	2261419	2262466	AT2TE10425	-	1047	A		Chr2	4669613	4670260	AT2TE19405	+	647	B
	Chr2	2265258	2265432	AT2TE10450	+	174	A		Chr2	4674291	4675499	AT2TE19420	+	1208	B
	Chr2	2265432	2266486	AT2TE10455	+	1054	A		Chr2	4675710	4676312	AT2TE19430	-	602	B
	Chr2	2280054	2282263	AT2TE10500	+	2209	A		Chr2	4676312	4677891	AT2TE19435	-	1579	B
	Chr2	2284253	2284530	AT2TE10515	+	277	A		Chr2	4678488	4683298	AT2TE19445	-	4810	B
	Chr2	2297112	2297763	AT2TE10590	+	651	A		Chr2	4684652	4687069	AT2TE19475	+	2417	B
	Chr2	2298979	2299781	AT2TE10605	+	802	A		Chr2	4687069	4687423	AT2TE19480	+	354	B
	Chr2	2302460	2307173	AT2TE10620	+	4713	A		Chr2	4687423	4689870	AT2TE19485	+	2447	B
	Chr2	2310983	2312454	AT2TE10655	-	1471	A		Chr2	4689870	4690772	AT2TE19495	-	902	B
	Chr2	2319898	2319958	AT2TE10700	-	60	A		Chr2	4691253	4693499	AT2TE19505	-	2246	B
	Chr2	2325529	2327252	AT2TE10735	+	1723	A		Chr2	4693499	4693801	AT2TE19510	+	302	B
	Chr2	2325751	2326879	AT2TE10740	+	1128	A		Chr2	4693801	4694973	AT2TE19515	+	1172	B
	Chr2	2330077	2330578	AT2TE10750	+	501	A		Chr2	4695259	4695877	AT2TE19530	+	618	B
	Chr2	2331932	2332392	AT2TE10755	-	461	A		Chr2	4695877	4699577	AT2TE19535	+	3700	B
	Chr2	2338863	2341762	AT2TE10785	-	2899	A		Chr2	4699596	4704005	AT2TE19540	-	4409	B
	Chr2	2356134	2356474	AT2TE10870	+	340	A		Chr2	4702800	4706947	AT2TE19555	+	4147	B
	Chr2	2357947	2358545	AT2TE10875	-	598	A		Chr2	4706947	4707147	AT2TE19560	+	200	B
	Chr2	2364153	2365948	AT2TE10905	+	1795	A		Chr2	4707147	4709667	AT2TE19565	-	2520	B
	Chr2	2373258	2374260	AT2TE10940	-	1002	A		Chr2	4709689	4713536	AT2TE19575	+	3847	B
	Chr2	2410158	2411238	AT2TE11015	-	1080	A		Chr2	4713536	4714827	AT2TE19580	+	1291	B
	Chr2	2413632	2413863	AT2TE11025	+	231	A		Chr2	4714827	4715984	AT2TE19585	+	1157	B
	Chr2	2428200	2428942	AT2TE11075	+	742	A		Chr2	4715984	4723844	AT2TE19590	+	7860	B
	Chr2	2446388	2446566	AT2TE11135	-	179	A		Chr2	4724592	4725018	AT2TE19595	-	426	B
	Chr2	2455713	2457177	AT2TE11180	-	1464	A		Chr2	4725034	4726100	AT2TE19600	-	1066	B
	Chr2	2520502	2520665	AT2TE11415	+	163	A		Chr2	4728861	4729352	AT2TE19610	+	491	B
	Chr2	2591838	2592555	AT2TE11645	+	717	A		Chr2	4729403	4737545	AT2TE19615	-	8142	B
	Chr2	2606719	2606792	AT2TE11710	-	74	A		Chr2	4731232	4732460	AT2TE19625	+	1228	B
	Chr2	2616338	2617117	AT2TE11750	-	779	A		Chr2	4739610	4741325	AT2TE19660	-	1715	B
	Chr2	2655100	2655205	AT2TE11845	-	105	A		Chr2	4741325	4742126	AT2TE19665	-	801	B
	Chr2	2688362	2689571	AT2TE11935	-	1209	A		Chr2	4746616	4747589	AT2TE19695	-	973	B
	Chr2	2695532	2696018	AT2TE11965	+	486	A		Chr2	4748516	4752465	AT2TE19705	-	3949	B
	Chr2	2730706	2731078	AT2TE12075	-	372	A		Chr2	4749917	4749999	AT2TE19710	+	82	B
	Chr2	2732864	2734487	AT2TE12095	-	1623	A		Chr2	4752791	4756820	AT2TE19735	-	4029	B
	Chr2	2734487	2735506	AT2TE12100	-	1019	A		Chr2	4760430	4761615	AT2TE19770	+	1185	B
	Chr2	2756775	2757374	AT2TE12180	+	599	A		Chr2	4769834	4769923	AT2TE19800	+	89	B
	Chr2	2763098	2763244	AT2TE12215	-	146	A		Chr2	4771785	4772179	AT2TE19810	-	394	B
	Chr2	2843830	2844755	AT2TE12465	+	925	A		Chr2	4773849	4775331	AT2TE19825	-	1482	B
	Chr2	2849743	2852332	AT2TE12475	+	2589	A		Chr2	4775629	4777898	AT2TE19845	-	2269	B
	Chr2	2867875	2867962	AT2TE12520	+	87	A		Chr2	4777901	4781421	AT2TE19850	-	3520	B
	Chr2	2892240	2892311	AT2TE12615	+	71	A		Chr2	4781421	4783565	AT2TE19855	-	2144	B
	Chr2	2902329	2907117	AT2TE12660	+	4788	A		Chr2	4783568	4784809	AT2TE19860	-	1241	B
	Chr2	2918990	2919887	AT2TE12735	-	897	A		Chr2	4786693	4787556	AT2TE19865	-	863	B
	Chr2	2922387	2923829	AT2TE12755	+	1442	A		Chr2	4816910	4818664	AT2TE19985	-	1754	B
	Chr2	2951786	2951867	AT2TE12845	-	81	A		Chr2	4818884	4822043	AT2TE19995	+	3159	B
	Chr2	2961262	2961821	AT2TE12890	+	559	A		Chr2	4822592	4823694	AT2TE20000	+	1102	B
	Chr2	2967981	2969230	AT2TE12950	+	1249	A		Chr2	4824787	4826159	AT2TE20010	+	1372	B
	Chr2	2980028	2980789	AT2TE12990	-	761	A		Chr2	4826396	4827613	AT2TE20015	-	1217	B
	Chr2	2983859	2985105	AT2TE13010	+	1246	A		Chr2	4827632	4829199	AT2TE20020	+	1567	B
	Chr2	2985105	2985522	AT2TE13015	-	417	A		Chr2	4829280	4829821	AT2TE20025	+	541	B
	Chr2	2985523	2985667	AT2TE13020	+	145	A		Chr2	4829821	4830253	AT2TE20030	+	432	B
	Chr2	3013131	3014478	AT2TE13140	-	1347	A		Chr2	4832216	4836549	AT2TE20045	+	4333	B
	Chr2	3023327	3023664	AT2TE13160	+	337	A		Chr2	4833803	4834568	AT2TE20050	+	765	B
	Chr2	3057684	3058062	AT2TE13315	+	378	A		Chr2	4835619	4835933	AT2TE20055	+	314	B
	Chr2	3058062	3058583	AT2TE13320	-	521	A		Chr2	4836555	4838296	AT2TE20060	+	1741	B
	Chr2	3059457	3060803	AT2TE13325	-	1346	A		Chr2	4837147	4837888	AT2TE20065	-	741	B
	Chr2	3060845	3061226	AT2TE13330	+	381	A		Chr2	4838481	4848343	AT2TE20075	+	9862	B
	Chr2	3074311	3075732	AT2TE13340	-	1421	A		Chr2	4848498	4850618	AT2TE20085	-	2120	B
	Chr2	3074943	3075461	AT2TE13345	-	518	A		Chr2	4850642	4852159	AT2TE20095	-	1517	B
	Chr2	3078570	3079248	AT2TE13360	-	678	A		Chr2	4852159	4852583	AT2TE20100	+	424	B
	Chr2	3079248	3079437	AT2TE13365	-	189	A		Chr2	4852583	4856562	AT2TE20105	+	3979	B
	Chr2	3079297	3079387	AT2TE13370	-	90	A		Chr2	4853655	4855287	AT2TE20110	+	1632	B
	Chr2	3168995	3169375	AT2TE13705	+	380	A		Chr2	4859812	4860670	AT2TE20135	+	858	B
	Chr2	3192625	3195997	AT2TE13800	+	3372	A		Chr2	4861228	4869425	AT2TE20140	-	8197	B
	Chr2	3197407	3198631	AT2TE13815	-	1224	A		Chr2	4869617	4870414	AT2TE20145	+	797	B
	Chr2	3211702	3213374	AT2TE13895	-	1672	A		Chr2	4873129	4888043	AT2TE20160	-	14914	B
	Chr2	3217573	3217854	AT2TE13935	+	281	A		Chr2	4896051	4897744	AT2TE20190	-	1693	B
	Chr2	3517282	3517482	AT2TE15340	-	200	A		Chr2	4900802	4909281	AT2TE20205	+	8479	B
	Chr2	3527953	3528142	AT2TE15380	-	189	A		Chr2	4910285	4919074	AT2TE20220	-	8789	B
	Chr2	3562650	3562712	AT2TE15550	+	62	A		Chr2	4925170	4933931	AT2TE20255	-	8761	B
	Chr2	3604312	3605677	AT2TE15695	+	1365	A		Chr2	4933931	4937269	AT2TE20260	+	3338	B
	Chr2	3674408	3675400	AT2TE15985	-	993	A		Chr2	4937269	4937528	AT2TE20265	+	259	B
	Chr2	3675404	3676269	AT2TE15990	-	865	A		Chr2	4942790	4945075	AT2TE20295	+	2285	B
	Chr2	3722410	3725767	AT2TE16160	-	3357	A		Chr2	4948690	4959161	AT2TE20330	+	10471	B
	Chr2	3766910	3767233	AT2TE16250	-	323	A		Chr2	4959497	4959918	AT2TE20335	-	421	B
	Chr2	3778741	3778879	AT2TE16280	-	138	A		Chr2	4960269	4961257	AT2TE20345	-	988	B
	Chr2	3985409	3985993	AT2TE16925	-	584	A		Chr2	4961257	4961404	AT2TE20350	+	147	B
	Chr2	4007377	4007516	AT2TE16950	+	139	A		Chr2	4961723	4961869	AT2TE20355	-	146	B
	Chr2	4007516	4008741	AT2TE16955	+	1225	A		Chr2	4961869	4962551	AT2TE20360	-	682	B
	Chr2	4023317	4024951	AT2TE17060	-	1634	A		Chr2	4964251	4964512	AT2TE20365	-	261	B
	Chr2	4048502	4049687	AT2TE17125	-	1185	A		Chr2	4965022	4965612	AT2TE20370	-	590	B
	Chr2	4061045	4065458	AT2TE17165	+	4413	A		Chr2	4965612	4965659	AT2TE20375	+	47	B
	Chr2	4065715	4067227	AT2TE17170	-	1512	A		Chr2	4966141	4966654	AT2TE20390	+	513	B
	Chr2	4071510	4074675	AT2TE17205	-	3165	A		Chr2	4967927	4969477	AT2TE20395	-	1550	B
	Chr2	4097103	4099067	AT2TE17320	-	1964	A		Chr2	4972375	4972927	AT2TE20415	+	552	B
	Chr2	4103953	4105050	AT2TE17345	-	1097	A		Chr2	4973336	4978133	AT2TE20420	-	4797	B
	Chr2	4121359	4122247	AT2TE17400	-	888	A		Chr2	4978332	4978468	AT2TE20430	+	136	B
	Chr2	4134730	4135422	AT2TE17450	-	692	A		Chr2	4978468	4990075	AT2TE20435	+	11607	B
	Chr2	4143439	4143644	AT2TE17510	-	205	A		Chr2	4991762	4993953	AT2TE20445	-	2191	B
	Chr2	4145332	4145695	AT2TE17525	-	363	A		Chr2	4993954	4995953	AT2TE20450	+	1999	B
	Chr2	4148679	4149237	AT2TE17550	+	558	A		Chr2	4996926	4997045	AT2TE20460	+	120	B
	Chr2	4195872	4196795	AT2TE17715	-	923	A		Chr2	4997085	4997142	AT2TE20465	+	57	B
	Chr2	4219022	4220768	AT2TE17805	-	1746	A		Chr2	4997142	4997163	AT2TE20470	+	21	B
	Chr2	4221438	4222040	AT2TE17810	+	602	A		Chr2	4997479	5001923	AT2TE20480	+	4444	B
	Chr2	4225742	4227440	AT2TE17845	+	1698	A		Chr2	5013821	5015200	AT2TE20590	-	1379	B
	Chr2	4301567	4301882	AT2TE18045	-	315	A		Chr2	5026831	5028640	AT2TE20650	-	1809	B
	Chr2	4302304	4303175	AT2TE18055	-	871	A		Chr2	5029104	5029940	AT2TE20665	+	836	B
	Chr2	4306386	4307780	AT2TE18090	-	1394	A		Chr2	5036235	5036602	AT2TE20695	+	367	B
	Chr2	4313258	4313650	AT2TE18130	+	392	A		Chr2	5040994	5048412	AT2TE20735	+	7418	B
	Chr2	4314779	4315149	AT2TE18140	-	370	A		Chr2	5056449	5056725	AT2TE20795	+	277	B
	Chr2	4340478	4340591	AT2TE18250	-	113	A		Chr2	5060428	5062129	AT2TE20815	-	1701	B
	Chr2	4350094	4350353	AT2TE18290	+	259	A		Chr2	5062543	5067149	AT2TE20835	-	4606	B
	Chr2	4351511	4353557	AT2TE18305	-	2046	A		Chr2	5073846	5078418	AT2TE20870	+	4572	B
	Chr2	4353598	4353787	AT2TE18315	-	189	A		Chr2	5079914	5080572	AT2TE20880	+	658	B
	Chr2	4353787	4357222	AT2TE18320	-	3435	A		Chr2	5080809	5081390	AT2TE20885	-	581	B
	Chr2	4370211	4371438	AT2TE18380	-	1227	A		Chr2	5084963	5090182	AT2TE20905	+	5219	B
	Chr2	4375498	4379828	AT2TE18395	+	4330	A		Chr2	5090852	5091911	AT2TE20925	+	1059	B
	Chr2	4414833	4415890	AT2TE18485	+	1057	A		Chr2	5092512	5097934	AT2TE20940	+	5422	B
	Chr2	4423356	4423837	AT2TE18535	+	481	A		Chr2	5095494	5097553	AT2TE20945	-	2059	B
	Chr2	4449035	4449656	AT2TE18680	+	621	A		Chr2	5099032	5099840	AT2TE20955	-	808	B
	Chr2	4449656	4451537	AT2TE18685	+	1881	A		Chr2	5100092	5111544	AT2TE20960	+	11452	B
	Chr2	4472568	4473672	AT2TE18745	-	1104	A		Chr2	5105900	5110242	AT2TE20965	+	4342	B
	Chr2	4473672	4473966	AT2TE18750	-	294	A		Chr2	5122698	5123402	AT2TE21020	+	704	B
	Chr2	4473966	4474210	AT2TE18755	+	244	A		Chr2	5123402	5127170	AT2TE21025	-	3768	B
	Chr2	4476375	4476894	AT2TE18775	+	519	A		Chr2	5127954	5132346	AT2TE21045	-	4392	B
	Chr2	4486058	4486323	AT2TE18815	-	265	A		Chr2	5132375	5133590	AT2TE21050	+	1215	B
	Chr2	4617477	4618126	AT2TE19125	-	649	A		Chr2	5133953	5140757	AT2TE21055	+	6804	B
	Chr2	4737699	4738951	AT2TE19650	-	1252	A		Chr2	5138593	5139791	AT2TE21060	+	1198	B
	Chr2	4744893	4745525	AT2TE19685	+	632	A		Chr2	5140759	5145643	AT2TE21065	+	4884	B
	Chr2	4751210	4751496	AT2TE19725	-	286	A		Chr2	5142292	5142775	AT2TE21080	+	483	B
	Chr2	4757879	4758824	AT2TE19745	-	945	A		Chr2	5145643	5146995	AT2TE21090	+	1352	B
	Chr2	4758824	4759615	AT2TE19750	-	791	A		Chr2	5147259	5148282	AT2TE21100	+	1023	B
	Chr2	4792833	4795747	AT2TE19885	-	2914	A		Chr2	5148282	5153752	AT2TE21105	+	5470	B
	Chr2	4795907	4796348	AT2TE19895	+	441	A		Chr2	5149571	5151199	AT2TE21110	+	1628	B
	Chr2	4796348	4797386	AT2TE19900	+	1038	A		Chr2	5154629	5158660	AT2TE21125	-	4031	B
	Chr2	4812328	4815931	AT2TE19970	-	3603	A		Chr2	5160338	5160886	AT2TE21135	+	548	B
	Chr2	4870414	4870647	AT2TE20150	-	233	A		Chr2	5160886	5160942	AT2TE21140	+	56	B
	Chr2	4889268	4890107	AT2TE20165	+	839	A		Chr2	5160942	5161356	AT2TE21145	+	414	B
	Chr2	4938515	4938640	AT2TE20270	-	125	A		Chr2	5161732	5163010	AT2TE21155	-	1278	B
	Chr2	4938989	4939660	AT2TE20275	-	671	A		Chr2	5163353	5163525	AT2TE21160	+	172	B
	Chr2	4947647	4948280	AT2TE20315	+	633	A		Chr2	5173789	5176138	AT2TE21225	+	2349	B
	Chr2	4960217	4960269	AT2TE20340	-	52	A		Chr2	5176138	5176230	AT2TE21230	+	92	B
	Chr2	4965990	4966118	AT2TE20380	-	128	A		Chr2	5176230	5176698	AT2TE21235	+	468	B
	Chr2	4990077	4991751	AT2TE20440	+	1674	A		Chr2	5177554	5177893	AT2TE21240	-	339	B
	Chr2	4997163	4997464	AT2TE20475	+	301	A		Chr2	5178595	5179606	AT2TE21250	+	1011	B
	Chr2	5003268	5004365	AT2TE20500	+	1097	A		Chr2	5182765	5185651	AT2TE21265	+	2886	B
	Chr2	5004365	5004804	AT2TE20510	-	439	A		Chr2	5187014	5188726	AT2TE21280	-	1712	B
	Chr2	5010068	5010650	AT2TE20540	-	582	A		Chr2	5190751	5213747	AT2TE21295	-	22996	B
	Chr2	5020088	5020876	AT2TE20620	-	788	A		Chr2	5220789	5227189	AT2TE21345	-	6400	B
	Chr2	5021454	5021753	AT2TE20625	-	299	A		Chr2	5228124	5229155	AT2TE21355	-	1032	B
	Chr2	5021753	5021888	AT2TE20630	-	135	A		Chr2	5229155	5237978	AT2TE21360	-	8823	B
	Chr2	5023016	5024024	AT2TE20640	-	1008	A		Chr2	5237983	5238319	AT2TE21365	-	336	B
	Chr2	5024024	5026526	AT2TE20645	-	2502	A		Chr2	5239616	5245609	AT2TE21380	-	5993	B
	Chr2	5031468	5032435	AT2TE20680	-	967	A		Chr2	5247443	5248679	AT2TE21395	+	1236	B
	Chr2	5032580	5033778	AT2TE20685	+	1198	A		Chr2	5249723	5250077	AT2TE21410	-	354	B
	Chr2	5037054	5037564	AT2TE20705	-	510	A		Chr2	5253784	5258058	AT2TE21440	+	4274	B
	Chr2	5037564	5038393	AT2TE20710	+	829	A		Chr2	5262444	5264751	AT2TE21455	+	2307	B
	Chr2	5048412	5048487	AT2TE20750	+	75	A		Chr2	5263613	5264260	AT2TE21460	+	647	B
	Chr2	5048487	5049699	AT2TE20755	-	1212	A		Chr2	5269209	5271410	AT2TE21485	+	2201	B
	Chr2	5053731	5054374	AT2TE20770	+	643	A		Chr2	5270335	5270985	AT2TE21490	+	650	B
	Chr2	5056732	5056788	AT2TE20800	-	56	A		Chr2	5275944	5280409	AT2TE21510	+	4465	B
	Chr2	5056788	5056994	AT2TE20805	-	206	A		Chr2	5278270	5279897	AT2TE21525	+	1627	B
	Chr2	5057719	5059782	AT2TE20810	-	2063	A		Chr2	5280409	5289362	AT2TE21530	-	8953	B
	Chr2	5067149	5067411	AT2TE20840	-	262	A		Chr2	5282587	5284512	AT2TE21535	-	1925	B
	Chr2	5079626	5080809	AT2TE20875	-	1183	A		Chr2	5285585	5286908	AT2TE21555	-	1323	B
	Chr2	5081405	5081652	AT2TE20890	+	247	A		Chr2	5291235	5291312	AT2TE21570	+	77	B
	Chr2	5084035	5084645	AT2TE20900	-	610	A		Chr2	5291556	5291763	AT2TE21580	+	207	B
	Chr2	5091981	5092512	AT2TE20935	+	531	A		Chr2	5297230	5306835	AT2TE21605	-	9605	B
	Chr2	5111839	5112091	AT2TE20970	+	252	A		Chr2	5306843	5312863	AT2TE21610	+	6020	B
	Chr2	5112091	5114332	AT2TE20975	-	2241	A		Chr2	5325566	5326737	AT2TE21670	-	1171	B
	Chr2	5119427	5120962	AT2TE21010	-	1535	A		Chr2	5327069	5329572	AT2TE21680	+	2503	B
	Chr2	5164830	5165453	AT2TE21175	+	623	A		Chr2	5331407	5337817	AT2TE21705	+	6410	B
	Chr2	5213747	5213881	AT2TE21300	-	134	A		Chr2	5338032	5346285	AT2TE21710	-	8253	B
	Chr2	5215098	5215319	AT2TE21310	-	221	A		Chr2	5346374	5347126	AT2TE21715	+	752	B
	Chr2	5227189	5228123	AT2TE21350	-	934	A		Chr2	5348588	5353710	AT2TE21730	-	5122	B
	Chr2	5245976	5246712	AT2TE21385	-	736	A		Chr2	5353713	5362152	AT2TE21745	-	8439	B
	Chr2	5250332	5253680	AT2TE21420	+	3348	A		Chr2	5362152	5365114	AT2TE21750	+	2962	B
	Chr2	5258059	5259426	AT2TE21445	+	1368	A		Chr2	5362753	5364364	AT2TE21755	-	1611	B
	Chr2	5259431	5262437	AT2TE21450	+	3006	A		Chr2	5365115	5381127	AT2TE21760	-	16012	B
	Chr2	5264792	5265237	AT2TE21470	+	446	A		Chr2	5367814	5377537	AT2TE21765	-	9723	B
	Chr2	5265238	5266185	AT2TE21475	+	948	A		Chr2	5381127	5381869	AT2TE21790	-	742	B
	Chr2	5266199	5269203	AT2TE21480	+	3004	A		Chr2	5381891	5383073	AT2TE21795	-	1182	B
	Chr2	5271517	5271962	AT2TE21500	+	446	A		Chr2	5383093	5385098	AT2TE21805	-	2005	B
	Chr2	5271962	5275944	AT2TE21505	+	3982	A		Chr2	5387018	5388592	AT2TE21815	+	1574	B
	Chr2	5277052	5278229	AT2TE21515	+	1177	A		Chr2	5394709	5399649	AT2TE21855	+	4940	B
	Chr2	5313260	5314936	AT2TE21620	+	1676	A		Chr2	5401540	5402003	AT2TE21860	+	463	B
	Chr2	5316404	5316774	AT2TE21635	-	370	A		Chr2	5403087	5403912	AT2TE21865	-	825	B
	Chr2	5319340	5319817	AT2TE21645	-	477	A		Chr2	5403920	5404753	AT2TE21870	-	833	B
	Chr2	5347126	5348175	AT2TE21720	+	1049	A		Chr2	5406452	5406719	AT2TE21875	-	267	B
	Chr2	5388592	5388865	AT2TE21820	+	273	A		Chr2	5406719	5407889	AT2TE21880	-	1170	B
	Chr2	5393576	5394399	AT2TE21845	+	823	A		Chr2	5412449	5413079	AT2TE21915	-	630	B
	Chr2	5409065	5409543	AT2TE21895	-	478	A		Chr2	5413238	5414854	AT2TE21925	-	1616	B
	Chr2	5465293	5465929	AT2TE22140	+	636	A		Chr2	5423295	5427630	AT2TE21970	+	4335	B
	Chr2	5466054	5467917	AT2TE22150	-	1863	A		Chr2	5427688	5428031	AT2TE21985	-	343	B
	Chr2	5468372	5469707	AT2TE22170	+	1335	A		Chr2	5430472	5430870	AT2TE21995	+	398	B
	Chr2	5501964	5502507	AT2TE22265	-	543	A		Chr2	5431952	5433163	AT2TE22005	-	1211	B
	Chr2	5506584	5507218	AT2TE22285	+	634	A		Chr2	5433468	5434387	AT2TE22015	+	919	B
	Chr2	5515053	5516134	AT2TE22305	-	1081	A		Chr2	5435852	5436305	AT2TE22020	-	453	B
	Chr2	5534247	5534492	AT2TE22350	-	245	A		Chr2	5438814	5439236	AT2TE22030	-	422	B
	Chr2	5541698	5542048	AT2TE22390	+	350	A		Chr2	5440526	5444575	AT2TE22040	+	4049	B
	Chr2	5557064	5557360	AT2TE22475	+	296	A		Chr2	5448117	5453268	AT2TE22065	-	5151	B
	Chr2	5557360	5558208	AT2TE22480	-	848	A		Chr2	5453327	5456816	AT2TE22075	-	3489	B
	Chr2	5573068	5573686	AT2TE22510	+	618	A		Chr2	5457468	5457685	AT2TE22105	-	217	B
	Chr2	5573728	5578989	AT2TE22520	+	5261	A		Chr2	5457691	5458476	AT2TE22110	-	785	B
	Chr2	5578990	5579130	AT2TE22525	+	140	A		Chr2	5458994	5460170	AT2TE22120	-	1176	B
	Chr2	5583336	5583581	AT2TE22540	-	245	A		Chr2	5469707	5470723	AT2TE22175	-	1016	B
	Chr2	5583581	5584814	AT2TE22545	-	1233	A		Chr2	5470723	5471062	AT2TE22180	+	339	B
	Chr2	5585393	5585503	AT2TE22555	+	110	A		Chr2	5471062	5479129	AT2TE22185	+	8067	B
	Chr2	5606127	5606390	AT2TE22640	-	263	A		Chr2	5473571	5474153	AT2TE22190	-	582	B
	Chr2	5607739	5609302	AT2TE22660	+	1563	A		Chr2	5479205	5481678	AT2TE22220	+	2473	B
	Chr2	5609600	5609831	AT2TE22680	-	231	A		Chr2	5481821	5483743	AT2TE22230	-	1922	B
	Chr2	5643356	5644475	AT2TE22780	+	1119	A		Chr2	5483743	5490467	AT2TE22235	-	6724	B
	Chr2	5645530	5645979	AT2TE22790	+	449	A		Chr2	5491267	5496081	AT2TE22245	+	4814	B
	Chr2	5645995	5646595	AT2TE22795	+	600	A		Chr2	5498815	5500511	AT2TE22260	+	1696	B
	Chr2	5647516	5648363	AT2TE22805	-	847	A		Chr2	5506522	5506584	AT2TE22280	+	62	B
	Chr2	5656853	5657024	AT2TE22850	-	171	A		Chr2	5507383	5507739	AT2TE22290	-	356	B
	Chr2	5659136	5660083	AT2TE22880	-	947	A		Chr2	5509343	5511171	AT2TE22295	-	1828	B
	Chr2	5662669	5663893	AT2TE22890	+	1224	A		Chr2	5516623	5516862	AT2TE22310	-	239	B
	Chr2	5670142	5671281	AT2TE22910	+	1139	A		Chr2	5517608	5520081	AT2TE22315	-	2473	B
	Chr2	5670291	5670439	AT2TE22915	-	148	A		Chr2	5522563	5523649	AT2TE22330	+	1086	B
	Chr2	5670439	5671143	AT2TE22920	+	704	A		Chr2	5523653	5527606	AT2TE22335	-	3953	B
	Chr2	5683813	5684118	AT2TE22980	+	305	A		Chr2	5528711	5534059	AT2TE22345	-	5348	B
	Chr2	5684118	5684241	AT2TE22985	-	123	A		Chr2	5560011	5560608	AT2TE22490	+	597	B
	Chr2	5709300	5709475	AT2TE23110	+	176	A		Chr2	5560972	5565082	AT2TE22495	+	4110	B
	Chr2	5709476	5709608	AT2TE23115	+	133	A		Chr2	5563576	5563629	AT2TE22500	+	53	B
	Chr2	5709608	5713343	AT2TE23120	-	3735	A		Chr2	5565095	5573068	AT2TE22505	+	7973	B
	Chr2	5725592	5727402	AT2TE23175	-	1810	A		Chr2	5584814	5585393	AT2TE22550	-	579	B
	Chr2	5732947	5733139	AT2TE23220	-	192	A		Chr2	5588705	5588937	AT2TE22565	-	232	B
	Chr2	5733139	5734015	AT2TE23225	-	876	A		Chr2	5589102	5590107	AT2TE22570	-	1005	B
	Chr2	5737912	5739437	AT2TE23245	-	1525	A		Chr2	5591471	5592863	AT2TE22585	+	1392	B
	Chr2	5739506	5741402	AT2TE23255	+	1896	A		Chr2	5600342	5605594	AT2TE22635	-	5252	B
	Chr2	5748452	5748678	AT2TE23305	+	226	A		Chr2	5607444	5607739	AT2TE22655	+	295	B
	Chr2	5748969	5749476	AT2TE23310	-	507	A		Chr2	5610253	5610302	AT2TE22685	-	49	B
	Chr2	5750709	5751392	AT2TE23325	+	683	A		Chr2	5610302	5612406	AT2TE22690	+	2104	B
[truncated: 4,117 more rows]

## Sheet: H2A.W
	H2A.W euchromatic arm TE peaks
	Chr1	77495	77610
	Chr1	433140	433720
	Chr1	1443730	1444225
	Chr1	1522835	1523010
	Chr1	1613415	1613815
	Chr1	1614210	1614410
	Chr1	2157725	2158020
	Chr1	2415495	2415735
	Chr1	2531540	2531740
	Chr1	2532005	2532235
	Chr1	2532345	2533315
	Chr1	2788515	2788760
	Chr1	2789150	2789530
	Chr1	2789545	2791525
	Chr1	2791655	2792720
	Chr1	2792825	2793650
	Chr1	2793765	2794235
	Chr1	2794255	2795455
	Chr1	2795555	2795905
	Chr1	2795955	2796225
	Chr1	2796280	2796870
	Chr1	2797010	2797940
	Chr1	2797965	2798045
	Chr1	2798275	2798775
	Chr1	2799185	2799840
	Chr1	2800175	2800520
	Chr1	3024025	3024330
	Chr1	3344045	3344305
	Chr1	3344320	3344730
	Chr1	3344755	3345080
	Chr1	3781250	3781485
	Chr1	3781600	3781890
	Chr1	3781910	3782430
	Chr1	3783025	3783530
	Chr1	3784790	3785195
	Chr1	3826275	3826620
	Chr1	3892785	3893165
	Chr1	3898280	3898490
	Chr1	3898870	3899135
	Chr1	3899200	3899475
	Chr1	3980175	3980465
	Chr1	4330390	4331515
	Chr1	4332040	4332360
	Chr1	4332975	4333345
	Chr1	4333825	4334070
	Chr1	4406225	4406715
	Chr1	4407830	4408410
	Chr1	4409160	4409410
	Chr1	4620750	4621255
	Chr1	4682770	4683000
	Chr1	4683220	4683490
	Chr1	4684080	4684655
	Chr1	4685290	4685535
	Chr1	4830610	4831200
	Chr1	5098750	5099250
	Chr1	5099520	5100795
	Chr1	5100840	5101260
	Chr1	5353965	5354455
	Chr1	5355265	5355465
	Chr1	5679410	5679645
	Chr1	5680425	5680555
	Chr1	5681400	5681660
	Chr1	5692050	5692720
	Chr1	5693680	5693940
	Chr1	5694820	5694900
	Chr1	5695590	5696405
	Chr1	5701375	5701595
	Chr1	5912080	5912535
	Chr1	5912560	5912815
	Chr1	5914485	5914700
	Chr1	5916030	5916260
	Chr1	5959185	5959445
	Chr1	6011805	6012195
	Chr1	6012895	6013270
	Chr1	6013575	6013835
	Chr1	6157230	6157785
	Chr1	6157935	6158180
	Chr1	6158325	6158590
	Chr1	6211160	6211745
	Chr1	6235735	6235990
	Chr1	6274365	6274640
	Chr1	6275650	6275985
	Chr1	6276125	6276390
	Chr1	6380595	6380930
	Chr1	6470535	6470770
	Chr1	6472830	6473055
	Chr1	6473270	6473480
	Chr1	6540530	6541060
	Chr1	6541075	6541675
	Chr1	6541710	6541915
	Chr1	6542725	6543390
	Chr1	6588565	6589090
	Chr1	6589285	6589575
	Chr1	6589605	6590840
	Chr1	6591065	6591390
	Chr1	6591405	6591990
	Chr1	6592285	6592775
	Chr1	6592805	6593075
	Chr1	6657595	6658040
	Chr1	6658410	6658655
	Chr1	6658700	6658905
	Chr1	6659090	6659335
	Chr1	6659350	6659705
	Chr1	6706565	6707305
	Chr1	6708265	6708730
	Chr1	6708830	6709130
	Chr1	6722945	6723155
	Chr1	6723170	6723410
	Chr1	7065555	7065725
	Chr1	7066390	7066745
	Chr1	7066875	7067615
	Chr1	7067850	7069895
	Chr1	7070185	7071455
	Chr1	7071690	7073250
	Chr1	7073375	7074715
	Chr1	7075030	7075870
	Chr1	7282815	7283035
	Chr1	7353070	7353480
	Chr1	7353630	7353880
	Chr1	7353995	7354510
	Chr1	7355220	7355550
	Chr1	7355820	7355865
	Chr1	7355890	7356225
	Chr1	7356690	7356900
	Chr1	7356930	7357080
	Chr1	7357375	7357805
	Chr1	7358440	7359480
	Chr1	7360000	7360870
	Chr1	7360920	7361965
	Chr1	7361980	7362265
	Chr1	7362290	7364420
	Chr1	7364800	7365080
	Chr1	7430540	7430875
	Chr1	7475225	7475525
	Chr1	7709700	7710055
	Chr1	7710260	7710585
	Chr1	7711535	7711925
	Chr1	7712085	7712375
	Chr1	7717430	7717635
	Chr1	7717895	7718290
	Chr1	7718415	7718670
	Chr1	7718850	7719135
	Chr1	7719180	7719550
	Chr1	7719660	7720315
	Chr1	7721170	7721820
	Chr1	7721855	7722240
	Chr1	7746340	7746820
	Chr1	7747370	7747610
	Chr1	7960070	7960400
	Chr1	7969835	7970310
	Chr1	7970330	7970845
	Chr1	7970865	7971420
	Chr1	7971665	7971895
	Chr1	7972000	7972225
	Chr1	7972250	7972330
	Chr1	8160180	8160630
	Chr1	8277335	8277595
	Chr1	8290325	8290720
	Chr1	8389930	8390140
	Chr1	8390715	8391125
	Chr1	8453730	8453995
	Chr1	8454040	8454850
	Chr1	8455120	8455725
	Chr1	8455880	8456595
	Chr1	8457205	8459060
	Chr1	8459615	8460010
	Chr1	8460225	8461075
	Chr1	8461185	8461690
	Chr1	8475590	8476205
	Chr1	8490470	8490815
	Chr1	8490850	8490915
	Chr1	8490945	8491755
	Chr1	8492010	8492505
	Chr1	8621960	8622175
	Chr1	8645260	8645880
	Chr1	8646905	8647165
	Chr1	8647945	8649050
	Chr1	8691555	8691860
	Chr1	8729735	8730060
	Chr1	8730075	8730990
	Chr1	8731025	8731310
	Chr1	8731730	8732010
	Chr1	8732265	8732610
	Chr1	8732650	8732820
	Chr1	8732840	8733525
	Chr1	8738125	8738335
	Chr1	8766180	8766605
	Chr1	8772650	8773030
	Chr1	8773155	8773245
	Chr1	8773350	8773555
	Chr1	8773975	8774715
	Chr1	8774955	8775475
	Chr1	8778450	8778715
	Chr1	8779005	8779470
	Chr1	8780685	8780940
	Chr1	8781075	8781605
	Chr1	8786680	8787330
	Chr1	8787445	8787895
	Chr1	8787910	8789835
	Chr1	8790140	8791165
	Chr1	8791185	8792830
	Chr1	8792985	8793715
	Chr1	8793760	8794750
	Chr1	8795555	8796790
	Chr1	8797125	8797540
	Chr1	8797560	8797925
	Chr1	8800945	8801240
	Chr1	8808870	8809380
	Chr1	8810250	8810505
	Chr1	8810890	8811825
	Chr1	8811990	8812330
	Chr1	8815385	8816095
	Chr1	8817340	8817590
	Chr1	8817805	8818480
	Chr1	8823995	8824285
	Chr1	8824430	8824820
	Chr1	8825045	8826070
	Chr1	8826505	8826815
	Chr1	8830420	8830630
	Chr1	8831985	8832630
	Chr1	8928555	8929115
	Chr1	8929245	8929835
	Chr1	8929950	8930455
	Chr1	8930495	8930880
	Chr1	8930975	8931225
	Chr1	8931240	8931660
	Chr1	8931790	8932355
	Chr1	9005415	9006425
	Chr1	9006465	9006995
	Chr1	9007345	9007630
	Chr1	9007650	9010045
	Chr1	9010140	9011630
	Chr1	9012000	9012275
	Chr1	9014270	9015405
	Chr1	9015580	9015830
	Chr1	9175635	9175855
	Chr1	9176100	9176380
	Chr1	9204340	9204675
	Chr1	9353950	9354205
	Chr1	9368020	9369615
	Chr1	9369735	9370095
	Chr1	9370415	9370645
	Chr1	9371955	9372165
	Chr1	9372355	9372985
	Chr1	9373100	9373395
	Chr1	9384085	9384345
	Chr1	9464800	9465015
	Chr1	9572480	9572745
	Chr1	9574340	9576080
	Chr1	9576200	9576490
	Chr1	9577115	9577365
	Chr1	9577760	9578115
	Chr1	9578800	9578980
	Chr1	9580695	9581240
	Chr1	9581290	9582445
	Chr1	9583140	9583925
	Chr1	9585610	9585990
	Chr1	9626825	9627085
	Chr1	9676900	9677320
	Chr1	9677450	9678040
	Chr1	9678280	9678570
	Chr1	9678710	9678860
	Chr1	9678900	9679105
	Chr1	9679920	9680420
	Chr1	9680795	9681830
	Chr1	9681985	9684145
	Chr1	9684365	9685650
	Chr1	9685730	9687240
	Chr1	9687530	9688405
	Chr1	9688515	9689260
	Chr1	9689385	9690615
	Chr1	9706660	9708005
	Chr1	9908300	9908710
	Chr1	9909235	9909470
	Chr1	10007760	10008060
	Chr1	10021920	10022170
	Chr1	10144570	10144795
	Chr1	10153105	10154690
	Chr1	10154820	10154890
	Chr1	10154920	10155625
	Chr1	10347400	10348100
	Chr1	10348620	10349155
	Chr1	10357430	10359375
	Chr1	10359540	10359805
	Chr1	10359850	10360190
	Chr1	10360235	10360500
	Chr1	10360590	10361710
	Chr1	10361785	10362540
	Chr1	10362565	10362805
	Chr1	10526120	10526320
	Chr1	10527010	10527220
	Chr1	10532335	10532930
	Chr1	10533245	10533775
	Chr1	10533795	10534025
	Chr1	10534350	10534735
	Chr1	10594040	10594205
	Chr1	10602865	10603325
	Chr1	10603765	10604045
	Chr1	10604250	10604425
	Chr1	10604835	10605050
	Chr1	10659715	10659925
	Chr1	10697165	10697645
	Chr1	10697755	10698395
	Chr1	10699055	10699325
	Chr1	10700010	10701110
	Chr1	10776575	10776800
	Chr1	10915885	10916145
	Chr1	10922485	10922705
	Chr1	10923700	10924205
	Chr1	10924445	10924715
	Chr1	10929500	10930955
	Chr1	10964540	10964790
	Chr1	10965320	10965665
	Chr1	10965755	10966000
	Chr1	11020355	11020600
	Chr1	11046970	11047275
	Chr1	11047510	11047755
	Chr1	11048225	11048630
	Chr1	11049525	11050100
	Chr1	11050365	11050835
	Chr1	11050895	11051125
	Chr1	11064540	11065250
	Chr1	11065330	11065670
	Chr1	11065695	11066360
	Chr1	11066375	11066800
	Chr1	11089525	11090150
	Chr1	11096920	11097600
	Chr1	11097765	11098390
	Chr1	11099050	11099655
	Chr1	11099935	11100885
	Chr1	11102390	11103535
	Chr1	11126775	11127045
	Chr1	11127405	11127675
	Chr1	11132025	11132355
	Chr1	11148070	11149265
	Chr1	11149340	11149780
	Chr1	11150275	11151190
	Chr1	11151310	11152285
	Chr1	11152445	11152940
	Chr1	11302430	11302640
	Chr1	11302815	11303100
	Chr1	11303515	11303760
	Chr1	11306565	11307090
	Chr1	11307250	11307485
	Chr1	11308415	11308640
	Chr1	11309550	11309760
	Chr1	11323155	11324050
	Chr1	11366450	11366515
	Chr1	11366550	11366910
	Chr1	11366925	11367280
	Chr1	11369425	11369825
	Chr1	11370870	11371200
	Chr1	11408000	11408450
	Chr1	11503050	11507705
	Chr1	11507810	11509115
	Chr1	11509135	11510355
	Chr1	11510370	11512630
	Chr1	11517865	11520585
	Chr1	11520600	11521045
	Chr1	11521250	11521475
	Chr1	11526020	11526270
	Chr1	11610335	11610695
	Chr1	11704340	11705005
	Chr1	11707630	11707690
	Chr1	11708190	11708640
	Chr1	11733605	11734260
	Chr1	11753180	11753940
	Chr1	11789460	11790645
	Chr1	11791085	11791730
	Chr1	11791865	11792250
	Chr1	11793370	11793860
	Chr1	11834890	11835350
	Chr1	11835770	11836600
	Chr1	11836640	11837125
	Chr1	11880045	11880290
	Chr1	11887770	11888400
	Chr1	11888455	11889835
	Chr1	11890255	11890505
	Chr1	11890735	11891115
	Chr1	11894580	11895485
	Chr1	11895825	11896090
	Chr1	11899435	11899725
	Chr1	11900490	11901670
	Chr1	11958215	11958660
	Chr1	11958815	11959120
	Chr1	11959140	11959895
	Chr1	11960090	11960625
	Chr1	11984825	11985110
	Chr1	12009250	12009450
	Chr1	12013635	12015330
	Chr1	12016005	12016870
	Chr1	12017225	12017455
	Chr1	12017815	12018195
	Chr1	12018285	12019760
	Chr1	12019880	12020165
	Chr1	12031635	12031845
	Chr1	12032650	12032730
	Chr1	12034240	12034395
	Chr1	12036115	12036910
	Chr1	12037365	12037940
	Chr1	12038100	12038560
	Chr1	12039095	12039260
	Chr1	12041490	12041715
	Chr1	12071100	12071410
	Chr1	12077690	12077955
	Chr1	12078530	12078905
	Chr1	12078950	12079075
	Chr1	12137170	12137345
	Chr1	12139450	12139725
	Chr1	12140055	12140090
	Chr1	12140140	12140450
	Chr1	12141520	12141875
	Chr1	12142280	12142870
	Chr1	12155565	12155770
	Chr1	12172975	12173455
	Chr1	12173480	12174165
	Chr1	12174980	12175375
	Chr1	12175490	12176070
	Chr1	12209725	12209955
	Chr1	12252895	12253075
	Chr1	12263130	12263355
	Chr1	12263465	12263820
	Chr1	12273890	12274220
	Chr1	12275090	12275335
	Chr1	12275460	12275715
	Chr1	12287295	12287515
	Chr1	12291050	12292030
	Chr1	12292150	12292295
	Chr1	12292425	12292765
	Chr1	12292790	12293695
	Chr1	12293965	12294945
	Chr1	12297550	12297770
	Chr1	12297800	12298090
	Chr1	12298170	12298505
	Chr1	12299105	12299705
	Chr1	12299750	12299920
	Chr1	12299940	12300045
	Chr1	12314855	12315805
	Chr1	12315990	12316435
	Chr1	12316805	12317145
	Chr1	12317640	12317850
	Chr1	12327860	12328135
	Chr1	12336175	12336365
	Chr1	12362035	12362410
	Chr1	12362990	12363840
	Chr1	12376655	12379695
	Chr1	12379925	12380460
	Chr1	17502555	17502805
	Chr1	17503115	17503620
	Chr1	17514960	17515895
	Chr1	17520680	17521160
	Chr1	17521290	17521690
	Chr1	17522005	17522300
	Chr1	17523610	17523810
	Chr1	17524470	17524800
	Chr1	17528720	17530835
	Chr1	17530935	17534185
	Chr1	17534210	17535160
	Chr1	17535495	17536230
	Chr1	17543140	17543375
	Chr1	17543665	17543830
	Chr1	17544180	17544600
	Chr1	17546360	17546580
	Chr1	17547280	17547940
	Chr1	17549420	17549715
	Chr1	17551990	17552280
	Chr1	17554970	17555185
	Chr1	17570840	17571095
	Chr1	17571145	17571580
	Chr1	17571705	17571940
	Chr1	17573650	17574190
	Chr1	17574235	17575320
	Chr1	17575485	17576145
	Chr1	17576265	17576460
	Chr1	17589925	17591250
	Chr1	17608370	17611310
	Chr1	17620605	17622355
	Chr1	17625050	17626795
	Chr1	17626820	17627145
	Chr1	17640980	17641185
	Chr1	17656135	17656340
	Chr1	17656795	17660255
	Chr1	17668095	17669165
	Chr1	17670255	17670740
	Chr1	17670940	17671230
	Chr1	17671360	17672225
	Chr1	17672480	17673280
	Chr1	17673410	17673940
	Chr1	17674490	17675010
	Chr1	17675040	17675640
	Chr1	17676375	17677825
	Chr1	17677945	17678510
	Chr1	17678535	17678805
	Chr1	17678845	17679125
	Chr1	17679360	17680640
	Chr1	17680680	17680980
	Chr1	17681100	17681885
	Chr1	17689875	17690430
	Chr1	17709960	17710185
	Chr1	17713155	17713420
	Chr1	17760380	17760965
	Chr1	17812485	17813365
	Chr1	17813390	17813725
	Chr1	17823920	17824255
	Chr1	17842665	17843705
	Chr1	17843865	17844455
	Chr1	17844480	17844925
	Chr1	17873945	17874425
	Chr1	17900715	17900900
	Chr1	17936965	17937440
	Chr1	17979845	17980080
	Chr1	18002380	18002640
	Chr1	18002775	18003205
	Chr1	18004925	18005220
	Chr1	18006335	18006475
	Chr1	18006520	18007290
	Chr1	18013690	18014055
	Chr1	18014210	18014505
	Chr1	18014545	18014835
	Chr1	18015025	18015280
	Chr1	18015400	18016295
	Chr1	18016980	18017580
	Chr1	18020205	18020535
	Chr1	18054140	18054285
	Chr1	18090010	18090220
	Chr1	18094835	18095115
	Chr1	18154485	18156980
	Chr1	18157025	18158125
	Chr1	18158240	18158680
	Chr1	18158710	18159055
	Chr1	18159295	18160825
	Chr1	18160930	18161455
	Chr1	18161695	18161975
	Chr1	18162225	18162860
	Chr1	18163800	18164510
	Chr1	18192070	18192845
	Chr1	18228775	18229135
	Chr1	18270405	18270610
	Chr1	18271490	18271970
	Chr1	18302895	18303550
	Chr1	18303580	18303870
	Chr1	18304075	18304340
	Chr1	18339005	18339275
	Chr1	18339450	18339760
	Chr1	18380435	18380645
	Chr1	18506815	18507070
	Chr1	18640915	18641190
	Chr1	18642020	18642425
	Chr1	18643850	18644145
	Chr1	18644365	18644775
	Chr1	18648680	18648995
	Chr1	18745730	18745955
	Chr1	18792000	18792190
	Chr1	18806795	18807195
	Chr1	18846500	18847145
	Chr1	18847175	18847615
	Chr1	18848120	18848560
	Chr1	18848980	18850220
	Chr1	18850490	18851695
	Chr1	18851710	18852470
	Chr1	18852610	18852890
	Chr1	18853120	18854025
	Chr1	18854220	18854900
	Chr1	18887640	18887840
	Chr1	18894730	18895145
	Chr1	18907200	18907735
	Chr1	18962630	18962960
	Chr1	18963000	18964360
	Chr1	18964390	18967340
	Chr1	18967640	18968710
	Chr1	18968730	18970980
	Chr1	18970995	18971515
	Chr1	18980895	18981170
	Chr1	19023390	19023590
	Chr1	19023735	19024070
	Chr1	19147535	19147805
	Chr1	19236505	19236845
	Chr1	19283785	19284125
	Chr1	19317770	19318050
	Chr1	19318105	19318555
	Chr1	19337130	19340935
	Chr1	19340960	19341065
	Chr1	19341155	19341850
	Chr1	19341980	19342135
	Chr1	19342815	19343165
	Chr1	19344250	19345170
	Chr1	19361615	19361855
	Chr1	19374955	19376135
	Chr1	19376555	19377070
	Chr1	19377410	19378050
	Chr1	19378165	19378755
	Chr1	19379510	19379805
	Chr1	19395085	19395285
	Chr1	19424885	19425155
	Chr1	19441140	19441340
	Chr1	19593575	19593950
	Chr1	19595735	19595975
	Chr1	19596450	19596575
	Chr1	19597480	19597570
	Chr1	19597780	19598240
	Chr1	19598580	19598850
	Chr1	19598875	19599445
	Chr1	19675980	19676365
	Chr1	19676745	19677120
	Chr1	19677255	19678025
	Chr1	19678375	19678880
	Chr1	19679460	19679805
	Chr1	19679970	19680365
	Chr1	19705850	19706075
	Chr1	19706430	19706695
	Chr1	19713485	19713740
	Chr1	19714140	19714775
	Chr1	19716250	19716475
	Chr1	19718045	19718395
	Chr1	19723190	19723460
	Chr1	19733220	19733470
	Chr1	19734085	19734920
	Chr1	19741605	19741830
	Chr1	19808055	19808295
	Chr1	19808810	19809265
	Chr1	20085165	20085895
	Chr1	20086105	20086345
	Chr1	20086390	20087185
	Chr1	20089505	20090215
	Chr1	20312240	20312930
	Chr1	20312985	20313720
	Chr1	20313860	20314155
	Chr1	20314185	20315025
	Chr1	20315180	20315440
	Chr1	20315455	20315680
	Chr1	20316805	20317610
	Chr1	20318530	20318825
	Chr1	20318840	20320445
	Chr1	20329455	20330115
	Chr1	20330665	20330870
	Chr1	20331130	20331755
	Chr1	20333315	20333695
	Chr1	20333795	20333925
	Chr1	20334055	20334515
	Chr1	20334855	20335045
	Chr1	20367130	20367435
	Chr1	20423475	20423765
	Chr1	20433905	20434160
	Chr1	20467855	20468080
	Chr1	20475915	20477910
	Chr1	20488885	20489010
	Chr1	20684435	20685040
	Chr1	20709775	20710025
	Chr1	20710340	20710660
	Chr1	20795280	20795690
	Chr1	20825650	20825865
	Chr1	20980950	20981230
	Chr1	20981335	20982020
	Chr1	20982180	20982525
	Chr1	21066550	21066945
	Chr1	21124715	21125010
	Chr1	21125025	21125645
	Chr1	21125730	21126205
	Chr1	21180690	21180910
	Chr1	21244305	21245450
	Chr1	21245465	21246805
	Chr1	21246920	21247185
	Chr1	21247880	21249435
	Chr1	21249615	21250075
	Chr1	21260590	21260870
	Chr1	21268805	21269030
	Chr1	21269395	21269625
	Chr1	21270235	21270810
	Chr1	21270915	21271245
	Chr1	21271795	21272020
	Chr1	21272060	21272380
	Chr1	21273165	21273570
	Chr1	21274045	21274360
	Chr1	21274705	21274905
	Chr1	21275255	21275425
	Chr1	21276390	21276610
	Chr1	21276640	21277020
	Chr1	21279710	21279950
	Chr1	21280135	21280385
	Chr1	21280410	21280475
	Chr1	21280780	21281050
	Chr1	21281355	21281585
	Chr1	21281615	21282020
	Chr1	21282410	21282645
	Chr1	21283120	21283550
	Chr1	21283865	21284170
	Chr1	21284295	21284965
	Chr1	21285830	21286655
	Chr1	21287325	21287500
	Chr1	21287755	21288065
	Chr1	21288525	21288765
	Chr1	21289260	21289590
	Chr1	21290425	21290640
	Chr1	21291710	21292075
	Chr1	21293510	21293630
	Chr1	21294875	21295090
	Chr1	21297140	21297355
	Chr1	21297930	21298215
	Chr1	21298660	21298895
	Chr1	21299505	21299780
	Chr1	21300710	21301120
	Chr1	21301920	21302100
	Chr1	21302275	21302595
	Chr1	21302900	21303320
	Chr1	21303410	21303625
	Chr1	21303655	21303915
	Chr1	21304460	21304675
	Chr1	21305195	21305585
	Chr1	21305980	21306735
	Chr1	21306750	21306805
	Chr1	21307500	21307685
	Chr1	21307865	21308135
	Chr1	21308405	21308700
	Chr1	21346225	21346435
	Chr1	21346615	21347405
	Chr1	21347540	21348940
	Chr1	21348960	21349065
	Chr1	21349405	21350515
	Chr1	21350550	21350880
	Chr1	21351010	21351345
	Chr1	21390040	21390370
	Chr1	21391415	21391645
	Chr1	21399665	21400100
	Chr1	21450260	21451590
	Chr1	21451695	21452570
	Chr1	21452595	21452655
	Chr1	21452705	21454140
	Chr1	21454175	21457450
	Chr1	21525555	21526140
	Chr1	21526615	21526865
	Chr1	21526935	21527690
	Chr1	21527830	21528020
	Chr1	21528890	21529195
	Chr1	21581750	21581840
	Chr1	21581865	21582100
	Chr1	21585385	21585440
	Chr1	21607685	21608140
	Chr1	21608305	21608590
	Chr1	21608630	21608990
	Chr1	21610825	21611120
	Chr1	21630620	21631145
	Chr1	21637530	21637810
	Chr1	21683185	21683505
	Chr1	21729855	21730205
	Chr1	21730340	21730545
	Chr1	21731095	21731365
	Chr1	21772265	21772665
	Chr1	21772960	21773170
	Chr1	21776095	21776720
	Chr1	21777305	21777605
	Chr1	21777740	21778380
	Chr1	21788985	21789360
	Chr1	21789460	21789775
	Chr1	21789820	21790140
	Chr1	21800605	21800810
	Chr1	21808175	21808565
	Chr1	21812215	21813070
	Chr1	21813600	21813930
	Chr1	21814070	21814280
	Chr1	21814870	21815170
	Chr1	21836935	21837115
	Chr1	21844760	21845065
	Chr1	21845180	21845590
	Chr1	21845690	21845955
	Chr1	21848530	21849115
	Chr1	21857925	21858485
	Chr1	21872845	21873160
	Chr1	21873330	21873680
	Chr1	21918720	21919005
	Chr1	21957725	21957925
	Chr1	21991505	21992780
	Chr1	22059400	22060130
	Chr1	22061050	22061710
	Chr1	22062025	22062520
	Chr1	22062545	22063110
	Chr1	22100960	22103555
	Chr1	22103570	22105190
	Chr1	22112580	22112925
	Chr1	22163290	22163825
	Chr1	22164115	22164605
	Chr1	22231540	22232085
	Chr1	22232350	22232400
	Chr1	22269755	22269980
	Chr1	22521205	22521420
	Chr1	22521445	22521750
	Chr1	22694755	22694985
	Chr1	22695740	22695995
	Chr1	22696200	22696560
	Chr1	22698295	22699100
	Chr1	22743115	22743450
	Chr1	22778090	22778520
	Chr1	22845760	22845960
	Chr1	22854550	22855000
	Chr1	22872675	22872875
	Chr1	23118675	23120140
	Chr1	23120255	23120750
	Chr1	23120940	23121180
	Chr1	23121545	23122850
	Chr1	23212080	23212655
	Chr1	23241115	23241785
	Chr1	23280490	23280750
	Chr1	23281060	23281680
	Chr1	23295875	23296590
	Chr1	23434925	23435200
	Chr1	23435585	23435790
	Chr1	23435950	23436005
	Chr1	23454140	23454930
	Chr1	23567040	23569100
	Chr1	23569270	23569415
	Chr1	23640045	23640285
	Chr1	23880695	23880895
	Chr1	23884315	23884525
	Chr1	23926365	23927020
	Chr1	23927260	23928255
	Chr1	23928280	23928630
	Chr1	23929725	23930020
	Chr1	23930925	23931335
	Chr1	23931445	23932435
	Chr1	23965755	23966240
	Chr1	24264985	24265200
	Chr1	24271935	24272180
	Chr1	24272315	24272965
	Chr1	24274105	24274565
	Chr1	24274595	24274755
	Chr1	24274795	24275195
	Chr1	24275330	24275910
	Chr1	24275950	24276420
	Chr1	24276765	24277215
	Chr1	24352520	24352825
	Chr1	24456060	24456455
	Chr1	24456880	24458285
	Chr1	24575905	24576105
	Chr1	24605595	24605895
	Chr1	24605935	24606170
	Chr1	24704935	24705115
	Chr1	24705240	24705485
	Chr1	24838210	24838420
	Chr1	25056945	25058220
	Chr1	25098000	25098235
	Chr1	25159275	25159600
	Chr1	25159620	25160420
	Chr1	25160760	25161140
	Chr1	25161575	25162070
	Chr1	25162515	25163175
	Chr1	25247215	25247500
	Chr1	25343445	25343865
	Chr1	25357860	25358060
	Chr1	25449660	25449930
	Chr1	25450600	25450985
	Chr1	25639930	25640435
	Chr1	25640555	25641420
	Chr1	25696525	25696765
	Chr1	26366870	26367200
	Chr1	26367225	26367670
	Chr1	26367695	26368460
	Chr1	26368500	26368590
	Chr1	26370055	26371320
	Chr1	26881095	26881860
	Chr1	26882605	26883130
	Chr1	26883165	26883635
	Chr1	27515490	27515995
	Chr1	27516130	27516150
	Chr1	27516175	27516435
	Chr1	27635400	27635705
	Chr1	28105465	28105675
	Chr1	28397955	28398165
	Chr1	28964790	28965345
	Chr1	28993855	28994060
	Chr1	29312705	29312935
	Chr1	29377640	29378315
	Chr1	29378590	29379015
	Chr1	29379235	29379930
	Chr1	29379965	29380015
	Chr1	29380125	29380535
	Chr1	29474700	29475125
	Chr1	29475260	29475715
	Chr1	29476955	29477160
	Chr1	29478645	29479375
	Chr1	29479685	29480380
	Chr1	29770260	29770505
	Chr1	29898615	29898825
	Chr1	30251270	30251525
	Chr2	1000	10365
	Chr2	10505	23720
	Chr2	23740	28025
	Chr2	28140	33995
	Chr2	34015	41845
	Chr2	42055	49995
	Chr2	58470	65445
	Chr2	65460	67255
	Chr2	67570	68070
	Chr2	68225	68595
	Chr2	68610	69655
	Chr2	71160	71445
	Chr2	71470	71670
	Chr2	72120	72335
	Chr2	99980	100160
	Chr2	130300	130445
	Chr2	192130	192330
	Chr2	238185	238450
	Chr2	244365	244865
	Chr2	244885	245960
	Chr2	246485	248020
	Chr2	248045	249290
	Chr2	373220	373795
	Chr2	373895	376650
	Chr2	376870	378305
	Chr2	395150	395385
	Chr2	400085	400270
	Chr2	402825	403040
	Chr2	448330	448745
	Chr2	530490	531690
	Chr2	532020	532220
	Chr2	533235	533625
	Chr2	534170	534525
	Chr2	535590	535835
	Chr2	536020	536080
	Chr2	536185	537755
	Chr2	543285	543495
	Chr2	565865	566470
	Chr2	566760	566975
	Chr2	566990	567420
	Chr2	567465	567780
	Chr2	567935	568070
	Chr2	568090	568360
	Chr2	568470	569685
	Chr2	569945	570025
	Chr2	571435	571690
	Chr2	571895	572290
	Chr2	572500	572860
	Chr2	573625	573930
	Chr2	574005	574410
	Chr2	574900	575030
	Chr2	576170	577000
	Chr2	577285	577485
	Chr2	577980	578180
	Chr2	578440	578840
	Chr2	580480	580875
	Chr2	581540	582485
	Chr2	601395	601645
	Chr2	601790	602210
	Chr2	639145	639455
	Chr2	667300	667615
	Chr2	667635	667850
	Chr2	676890	677315
	Chr2	678365	678875
	Chr2	687390	687725
	Chr2	688195	688405
	Chr2	688605	688920
	Chr2	726695	726950
	Chr2	727130	727450
	Chr2	742195	742415
	Chr2	744315	744515
	Chr2	752540	753260
	Chr2	753345	753535
	Chr2	755080	755515
	Chr2	795600	796035
	Chr2	819220	819810
	Chr2	820200	820650
	Chr2	820785	822365
	Chr2	822530	822670
	Chr2	822840	823880
	Chr2	824325	825335
	Chr2	825630	825850
	Chr2	885680	885905
	Chr2	886005	886450
	Chr2	887445	887740
	Chr2	895510	896360
	Chr2	897365	897765
	Chr2	898830	899065
	Chr2	911395	911840
	Chr2	911885	912200
	Chr2	912840	913005
	Chr2	913655	914355
	Chr2	925030	925240
	Chr2	926080	926510
	Chr2	926525	926740
	Chr2	928075	928375
	Chr2	929785	930140
	Chr2	930395	930970
	Chr2	931240	931585
	Chr2	931685	931915
	Chr2	932750	933025
	Chr2	933135	933345
	Chr2	953665	953755
	Chr2	963000	963245
	Chr2	984000	984270
	Chr2	1011210	1011690
	Chr2	1012100	1012355
	Chr2	1085485	1086820
	Chr2	1089315	1089555
	Chr2	1107955	1108305
	Chr2	1109355	1109575
	Chr2	1109955	1110275
	Chr2	1167635	1168045
	Chr2	1190225	1190400
	Chr2	1203250	1203385
	Chr2	1203505	1203765
	Chr2	1204205	1204325
	Chr2	1205370	1205615
	Chr2	1206675	1207060
	Chr2	1207865	1208175
	Chr2	1208510	1208840
	Chr2	1208985	1209435
	Chr2	1210705	1210790
	Chr2	1211210	1211415
	Chr2	1211770	1211985
	Chr2	1213325	1213655
	Chr2	1214910	1215150
	Chr2	1215265	1215520
	Chr2	1218235	1219175
	Chr2	1219200	1219980
	Chr2	1220585	1220810
	Chr2	1221415	1221710
	Chr2	1221865	1222505
	Chr2	1226395	1226745
	Chr2	1227830	1228240
	Chr2	1228525	1228810
	Chr2	1229000	1229790
	Chr2	1230200	1230825
	Chr2	1231270	1231880
	Chr2	1232000	1232460
	Chr2	1234380	1234705
	Chr2	1243410	1243645
	Chr2	1243810	1244050
	Chr2	1244265	1244445
	Chr2	1244485	1244705
	Chr2	1251675	1252900
	Chr2	1265000	1265405
	Chr2	1265565	1266140
	Chr2	1266250	1268380
	Chr2	1268475	1268725
	Chr2	1269040	1270265
	Chr2	1270510	1271200
	Chr2	1271235	1271780
	Chr2	1287785	1288195
	Chr2	1288225	1288775
	Chr2	1293510	1293715
	Chr2	1293860	1294590
	Chr2	1295740	1296120
	Chr2	1297685	1298020
	Chr2	1298260	1299050
	Chr2	1299075	1299280
	Chr2	1299765	1300195
	Chr2	1300465	1301285
	Chr2	1301795	1302055
	Chr2	1302130	1302670
	Chr2	1302945	1303395
	Chr2	1304310	1304630
	Chr2	1306695	1306915
	Chr2	1308060	1308335
	Chr2	1309605	1311135
	Chr2	1312710	1312995
	Chr2	1321955	1322325
	Chr2	1327010	1327365
	Chr2	1328470	1328830
	Chr2	1340550	1340775
	Chr2	1342030	1342610
	Chr2	1343195	1343460
	Chr2	1343475	1343750
	Chr2	1346155	1346445
	Chr2	1349740	1350020
	Chr2	1350040	1350130
	Chr2	1367345	1367595
	Chr2	1372855	1373485
	Chr2	1387035	1387565
	Chr2	1387595	1387730
	Chr2	1389045	1391190
	Chr2	1391230	1391600
	Chr2	1391935	1392775
	Chr2	1395105	1395595
	Chr2	1397430	1397635
	Chr2	1398850	1399470
	Chr2	7327900	7328500
	Chr2	7348900	7349500
	Chr2	7349645	7349905
	Chr2	7351360	7351605
	Chr2	7351820	7352100
	Chr2	7352540	7353220
	Chr2	7439725	7439990
	Chr2	7441070	7441420
	Chr2	7441710	7442005
	Chr2	7448105	7448635
	Chr2	7448900	7449255
	Chr2	7452895	7454160
	Chr2	7456815	7457360
	Chr2	7527375	7527540
	Chr2	7527580	7527975
	Chr2	7537260	7538420
	Chr2	7581575	7581795
	Chr2	7581990	7583365
	Chr2	7657530	7657745
	Chr2	7658060	7658640
	Chr2	7658880	7659430
	Chr2	7720220	7720445
	Chr2	7777200	7777410
	Chr2	7777440	7777830
	Chr2	7780295	7780580
	Chr2	7879715	7880320
	Chr2	7960185	7960460
	Chr2	8009570	8009640
	Chr2	8016130	8016355
	Chr2	8017890	8018515
	Chr2	8018535	8018875
	Chr2	8019065	8019270
	Chr2	8035375	8035955
	Chr2	8036370	8036625
	Chr2	8036690	8036940
	Chr2	8039780	8040160
	Chr2	8040435	8040640
	Chr2	8040805	8041005
	Chr2	8076160	8076360
	Chr2	8076495	8077220
	Chr2	8077240	8077485
	Chr2	8175145	8175355
	Chr2	8199255	8199380
	Chr2	8199625	8199935
	Chr2	8236580	8236975
	Chr2	8269870	8270840
	Chr2	8271160	8271990
	Chr2	8272165	8272725
	Chr2	8273130	8273420
	Chr2	8273450	8273765
	Chr2	8300320	8300745
	Chr2	8301530	8302445
	Chr2	8380020	8380285
	Chr2	8381385	8381600
	Chr2	8382030	8382275
	Chr2	8382890	8383330
	Chr2	8407495	8407705
	Chr2	8421530	8421740
	Chr2	8422290	8422630
	Chr2	8453320	8453720
	Chr2	8538140	8538610
	Chr2	8560680	8560910
	Chr2	8561320	8562610
	Chr2	8562645	8562890
	Chr2	8563725	8563940
	Chr2	8565705	8566665
	Chr2	8568700	8568960
	Chr2	8569005	8569400
	Chr2	8590675	8591045
	Chr2	8625875	8626500
	Chr2	8626685	8627065
	Chr2	8816090	8817480
	Chr2	8820070	8820800
	Chr2	8820845	8821440
	Chr2	8874715	8874960
	Chr2	8875045	8875330
	Chr2	8883635	8883880
	Chr2	8893800	8894125
	Chr2	8894455	8894735
	Chr2	8894775	8895120
	Chr2	8963050	8963265
	Chr2	8963460	8963740
	Chr2	8993775	8994010
	Chr2	8994120	8994790
	Chr2	8994970	8995430
	Chr2	8995570	8996040
	Chr2	8996665	8997140
	Chr2	8997180	8997700
	Chr2	9057705	9058040
	Chr2	9058360	9058430
	Chr2	9058450	9058895
	Chr2	9058985	9059195
	Chr2	9063145	9063400
	Chr2	9122055	9122290
	Chr2	9122330	9122560
	Chr2	9122585	9122945
	Chr2	9123360	9123815
	Chr2	9124345	9124635
	Chr2	9124660	9124700
	Chr2	9124815	9125660
	Chr2	9161300	9161825
	Chr2	9187500	9188480
	Chr2	9188500	9188790
	Chr2	9190005	9190650
	Chr2	9191360	9195235
	Chr2	9312330	9313025
	Chr2	9313045	9313245
	Chr2	9313950	9314140
	Chr2	9329390	9329660
	Chr2	9329975	9330485
	Chr2	9432410	9432655
	Chr2	9447240	9449340
	Chr2	9481650	9482025
	Chr2	9529680	9529905
	Chr2	9556975	9557320
	Chr2	9591850	9592055
	Chr2	9653195	9653400
	Chr2	9653835	9654165
	Chr2	9654210	9654285
	Chr2	9655190	9655520
	Chr2	9693035	9693285
	Chr2	9717225	9717455
	Chr2	9762940	9763635
	Chr2	9852420	9852660
	Chr2	9855415	9855705
	Chr2	9896550	9896810
	Chr2	9923110	9923505
	Chr2	9965655	9965950
	Chr2	10001870	10002075
	Chr2	10002115	10002920
	Chr2	10002960	10004010
	Chr2	10004285	10005085
	Chr2	10005360	10005925
	Chr2	10006265	10007830
	Chr2	10007875	10008210
	Chr2	10008240	10009360
	Chr2	10017970	10018250
	Chr2	10020045	10020275
	Chr2	10085675	10086230
	Chr2	10086280	10087405
	Chr2	10087460	10087705
	Chr2	10087865	10088285
	Chr2	10088320	10088690
	Chr2	10088995	10090010
	Chr2	10090025	10090160
	Chr2	10090440	10091255
	Chr2	10091290	10091460
	Chr2	10091570	10092920
	Chr2	10093185	10093470
	Chr2	10145220	10145435
	Chr2	10317865	10318080
	Chr2	10351445	10351725
	Chr2	10353330	10353780
	Chr2	10354640	10354915
	Chr2	10355245	10355465
	Chr2	10356615	10358310
	Chr2	10358345	10358585
	Chr2	10407485	10407920
	Chr2	10408660	10409450
	Chr2	10409630	10410095
	Chr2	10410365	10410570
	Chr2	10411270	10411575
	Chr2	10412335	10412560
	Chr2	10412755	10413095
	Chr2	10413310	10413525
	Chr2	10465540	10465835
	Chr2	10465990	10466210
	Chr2	10533475	10534170
	Chr2	10590035	10590275
	Chr2	10592885	10593190
	Chr2	10593215	10594470
	Chr2	10594570	10600890
	Chr2	10601035	10602635
	Chr2	10602945	10604705
	Chr2	10604720	10605095
	Chr2	10605240	10605980
	Chr2	10606250	10606575
	Chr2	10606630	10606880
	Chr2	10606895	10608215
	Chr2	10623620	10623930
	Chr2	10636200	10636385
	Chr2	10636905	10637310
	Chr2	10639345	10639830
	Chr2	10640780	10641275
	Chr2	10641705	10641945
	Chr2	10641960	10642400
	Chr2	10643845	10644080
	Chr2	10646365	10646725
	Chr2	10648355	10648660
	Chr2	10648875	10649655
	Chr2	10650070	10650320
	Chr2	10709760	10710080
	Chr2	10732505	10732720
	Chr2	10807390	10807650
	Chr2	10874715	10875240
	Chr2	10875270	10875550
	Chr2	10875700	10875945
	Chr2	10876710	10877195
	Chr2	10877500	10877925
	Chr2	10878145	10879480
	Chr2	10879525	10879945
	Chr2	10932220	10932450
	Chr2	11100690	11100945
	Chr2	11303125	11303350
	Chr2	11325690	11325970
	Chr2	11327155	11327760
	Chr2	11327975	11328530
	Chr2	11378720	11379015
	Chr2	11387065	11387300
	Chr2	11398310	11398540
	Chr2	11642920	11643185
	Chr2	11714560	11715575
	Chr2	11760090	11760290
	Chr2	11768065	11768390
	Chr2	11768585	11769565
	Chr2	11867550	11867790
	Chr2	11920915	11921120
	Chr2	11948550	11948755
	Chr2	11983080	11983320
	Chr2	12285455	12285760
	Chr2	12331755	12332115
	Chr2	12332250	12332615
	Chr2	12449655	12450275
	Chr2	12450395	12451640
	Chr2	12451665	12452290
	Chr2	12452460	12452885
	Chr2	12453055	12454120
	Chr2	12454240	12454515
	Chr2	12473090	12473265
	Chr2	12541075	12541270
	Chr2	12566190	12566425
	Chr2	12566795	12567065
	Chr2	12567090	12568795
	Chr2	12568820	12569225
	Chr2	12569380	12569950
	Chr2	12569990	12571830
	Chr2	12571855	12573590
	Chr2	12573625	12573910
	Chr2	12574210	12574545
	Chr2	12574665	12575360
	Chr2	12575400	12575460
	Chr2	12575840	12576605
	Chr2	12576815	12577495
	Chr2	12577960	12578355
	Chr2	12656955	12657325
	Chr2	12657795	12657875
	Chr2	12657990	12659600
	Chr2	12659640	12659910
	Chr2	12733995	12734300
	Chr2	12734605	12734850
	Chr2	12734985	12735330
	Chr2	12735855	12736415
	Chr2	12739475	12739885
	Chr2	12742530	12742725
	Chr2	12742890	12743310
	Chr2	12754325	12754540
	Chr2	12754965	12755225
	Chr2	12802300	12802540
	Chr2	12915185	12915445
	Chr2	13223475	13223910
	Chr2	13223960	13224920
	Chr2	13224955	13225905
	Chr2	13225945	13226620
	Chr2	13232990	13233205
	Chr2	13337025	13337255
	Chr2	13422070	13422515
	Chr2	13422625	13424660
	Chr2	13424675	13425795
	Chr2	13425825	13425955
	Chr2	13426255	13426470
	Chr2	13661065	13661280
	Chr2	14402345	14402750
	Chr2	14403095	14403180
	Chr2	14403840	14404270
	Chr2	14408440	14408665
	Chr2	14408710	14409225
	Chr2	14409240	14409840
	Chr2	14409965	14410270
	Chr2	14410955	14411195
	Chr2	14411400	14411965
	Chr2	14412115	14412345
	Chr2	14472605	14472810
	Chr2	14472960	14473375
	Chr2	14636390	14636640
	Chr2	14812345	14812600
	Chr2	14859715	14860285
	Chr2	14860415	14860665
	Chr2	14952030	14952570
	Chr2	15273645	15274060
	Chr2	15389980	15390325
	Chr2	15391000	15391070
	Chr2	15391170	15391420
	Chr2	15411165	15411520
	Chr2	15595485	15595755
	Chr2	15596020	15596320
	Chr2	15596565	15596945
	Chr2	15680635	15680945
	Chr2	15681150	15681385
	Chr2	15681435	15681700
	Chr2	16003715	16004000
	Chr2	16005285	16005665
	Chr2	16005885	16006170
	Chr2	16008610	16008975
	Chr2	16009000	16009200
	Chr2	16009820	16010355
	Chr2	16596180	16596415
	Chr2	16835005	16835315
	Chr2	16890120	16890320
	Chr2	16890350	16890665
	Chr2	16973310	16973555
	Chr2	17093110	17093530
	Chr2	17093660	17094095
	Chr2	17094310	17094350
	Chr2	17094365	17094855
	Chr2	17338055	17338190
	Chr2	17338310	17338750
	Chr2	17344075	17344280
	Chr2	17418155	17418585
	Chr2	17418850	17419170
	Chr2	17499575	17499780
	Chr2	17635265	17635515
	Chr2	17904675	17904915
	Chr2	18497965	18498220
	Chr2	18594490	18594870
	Chr2	18651455	18651690
	Chr2	18651820	18653040
	Chr2	18653245	18653650
	Chr2	18653980	18654680
	Chr2	18654695	18655170
	Chr2	18971865	18972185
	Chr2	19374005	19374230
	Chr2	19471010	19471030
	Chr2	19683610	19683960
	Chr3	28625	28910
	Chr3	129475	129875
	Chr3	156335	156705
	Chr3	451965	452175
	Chr3	1692660	1692910
	Chr3	1784105	1784310
	Chr3	1963515	1963880
	Chr3	1964475	1964770
	Chr3	1966655	1966980
	Chr3	1967115	1967125
	Chr3	1967245	1967475
	Chr3	2260310	2260690
	Chr3	2361125	2361540
	Chr3	2628930	2629175
	Chr3	2808440	2808730
	Chr3	2808990	2809970
	Chr3	2810080	2810545
	Chr3	2810650	2811310
	Chr3	2811615	2811970
	Chr3	2812285	2812545
	Chr3	2813140	2813815
	Chr3	2814340	2815015
	Chr3	2815455	2815925
	Chr3	2816195	2816545
	Chr3	2817200	2817640
	Chr3	2818195	2818715
	Chr3	2921930	2922165
	Chr3	2922185	2923115
	Chr3	3411330	3411860
	Chr3	3424030	3424565
	Chr3	3664300	3664550
	Chr3	3807360	3808645
	Chr3	3808880	3809325
	Chr3	3809455	3810160
	Chr3	3811380	3812220
	Chr3	3812360	3812985
	Chr3	3817570	3817905
	Chr3	3838030	3838230
	Chr3	3965285	3965575
	Chr3	4341655	4341935
	Chr3	4454400	4455285
	Chr3	4455455	4456090
	Chr3	4928090	4928680
	Chr3	4929890	4930270
	Chr3	4930580	4931330
	Chr3	5152520	5153040
	Chr3	5153075	5153435
	Chr3	5153820	5154025
	Chr3	5154490	5154840
	Chr3	5154865	5155125
	Chr3	5156195	5156450
	Chr3	5278065	5278640
	Chr3	5279175	5279925
	Chr3	5281870	5282710
	Chr3	5283345	5284045
	Chr3	5284630	5286635
	Chr3	5651960	5652290
	Chr3	5683270	5683605
	Chr3	5728630	5728985
	Chr3	5780205	5780585
	Chr3	5851860	5852105
	Chr3	5930635	5930850
	Chr3	5930970	5931295
	Chr3	6293920	6294640
	Chr3	6294820	6295190
	Chr3	6990195	6991550
	Chr3	6991700	6991940
	Chr3	7234690	7235765
	Chr3	7235955	7236660
	Chr3	7236785	7237215
	Chr3	7279940	7280165
	Chr3	7318510	7318640
	Chr3	7342775	7343425
	Chr3	7343445	7344285
	Chr3	7566615	7566910
	Chr3	7600380	7600710
	Chr3	7714345	7714560
	Chr3	7749335	7749750
	Chr3	7800545	7800890
	Chr3	7803980	7804700
	Chr3	7804880	7805275
	Chr3	7805425	7805860
	Chr3	7805970	7806895
	Chr3	7847705	7847910
	Chr3	7849750	7850340
	Chr3	7851195	7851500
	Chr3	7859495	7859700
	Chr3	7859790	7860210
	Chr3	7906150	7906375
	Chr3	7949465	7949690
	Chr3	7978830	7979125
	Chr3	8002330	8003225
	Chr3	8093610	8093985
	Chr3	8094565	8095005
	Chr3	8095575	8095800
	Chr3	8101875	8102250
	Chr3	8130635	8131120
	Chr3	8131550	8132070
	Chr3	8132420	8133080
	Chr3	8138445	8138675
	Chr3	8233030	8233335
	Chr3	8271490	8271780
	Chr3	8272245	8272835
	Chr3	8364860	8365030
	Chr3	8367435	8367650
	Chr3	8371505	8371795
	Chr3	8373870	8374355
	Chr3	8409255	8409500
	Chr3	8410890	8411125
	Chr3	8511150	8511460
	Chr3	8526585	8527875
	Chr3	8537785	8538780
	Chr3	8539175	8539465
	Chr3	8539490	8540130
	Chr3	8541780	8542030
	Chr3	8542305	8542985
	Chr3	8543280	8543520
	Chr3	8752260	8752470
	Chr3	8843710	8845780
	Chr3	8845800	8846840
	Chr3	8847120	8847220
	Chr3	8847235	8847970
	Chr3	8848545	8849470
	Chr3	8849545	8849935
	Chr3	8849975	8850905
	Chr3	8850935	8851315
	Chr3	8851430	8854070
	Chr3	8854195	8854435
	Chr3	8854895	8855680
	Chr3	8856885	8857600
	Chr3	8857810	8858255
	Chr3	8872705	8872915
	Chr3	8894855	8895105
	Chr3	8937235	8937735
	Chr3	8937940	8938340
	Chr3	8956535	8956915
	Chr3	8977105	8977700
	Chr3	8977830	8978040
	Chr3	9011830	9012135
	Chr3	9012450	9012750
	Chr3	9012770	9012780
	Chr3	9013970	9015380
	Chr3	9015400	9017115
	Chr3	9019155	9019350
	Chr3	9140360	9140930
	Chr3	9185515	9185770
	Chr3	9185910	9186295
	Chr3	9187135	9187360
	Chr3	9202230	9202490
	Chr3	9226890	9227305
	Chr3	9227425	9227700
	Chr3	9229365	9229740
	Chr3	9230635	9230865
	Chr3	9231590	9232560
	Chr3	9236890	9237140
	Chr3	9237255	9238905
	Chr3	9239200	9240905
	Chr3	9322085	9322395
	Chr3	9378855	9379135
	Chr3	9379735	9380160
	Chr3	9380255	9380775
	Chr3	9380790	9381270
	Chr3	9388030	9388960
	Chr3	9392210	9392270
	Chr3	9392835	9393160
	Chr3	9393595	9393825
	Chr3	9434995	9435610
	Chr3	9435630	9436510
	Chr3	9436830	9437510
	Chr3	9444785	9445690
	Chr3	9459270	9459490
	Chr3	9558415	9558760
	Chr3	9608365	9608680
	Chr3	9609105	9609540
	Chr3	9609905	9610135
	Chr3	9610160	9610425
	Chr3	9613225	9613535
	Chr3	9613685	9614665
	Chr3	9615325	9615570
	Chr3	9615925	9616680
	Chr3	9616730	9616980
	Chr3	9616995	9617155
	Chr3	9618380	9618720
	Chr3	9619045	9619680
	Chr3	9620160	9621420
	Chr3	9621690	9624195
	Chr3	9624215	9625090
	Chr3	9692375	9693145
	Chr3	9693270	9693575
	Chr3	9693740	9694540
	Chr3	9695240	9695655
	Chr3	9695870	9696475
	Chr3	9696690	9697590
	Chr3	9724260	9724585
	Chr3	9724830	9726955
	Chr3	9727075	9727800
	Chr3	9728060	9730440
	Chr3	9730835	9731125
	Chr3	9731140	9731370
	Chr3	9731410	9731790
	Chr3	9731895	9732355
	Chr3	9732500	9734155
	Chr3	9734535	9735010
	Chr3	9735025	9735570
	Chr3	9861675	9861875
	Chr3	9862295	9862635
	Chr3	9899560	9899775
	Chr3	9900495	9901205
	Chr3	9903420	9903690
	Chr3	9965575	9965855
	Chr3	9974885	9975345
	Chr3	9975565	9975905
	Chr3	9981885	9982115
	Chr3	10005180	10005545
	Chr3	10005675	10006075
	Chr3	10006610	10007545
	Chr3	10007560	10007930
	Chr3	10106165	10106485
	Chr3	10106510	10107290
	Chr3	10110335	10111400
	Chr3	10115875	10116080
	Chr3	10166985	10167135
	Chr3	10167150	10167395
	Chr3	10167890	10168115
	Chr3	10199980	10200200
	Chr3	10223295	10223480
	Chr3	10223505	10224200
	Chr3	10224405	10224605
	Chr3	10224650	10225205
	Chr3	10293095	10293390
	Chr3	10295235	10295445
	Chr3	10301045	10301290
	Chr3	10301395	10301405
	Chr3	10302025	10302245
	Chr3	10339940	10340245
	Chr3	10340270	10340625
	Chr3	10340845	10341655
	Chr3	10341830	10342125
	Chr3	10342405	10342455
	Chr3	10342495	10343025
	Chr3	10343110	10343115
	Chr3	10343295	10343625
	Chr3	10343785	10344520
	Chr3	10344775	10345170
	Chr3	10345305	10345585
	Chr3	10402880	10403370
	Chr3	10403480	10403805
	Chr3	10404345	10404910
	Chr3	10405165	10405585
	Chr3	10405630	10405840
	Chr3	10417275	10417495
	Chr3	10461835	10462990
	Chr3	10463610	10464000
	Chr3	10476540	10476860
	Chr3	10477245	10477665
	Chr3	10478025	10478515
	Chr3	10478535	10478550
	Chr3	10478770	10479005
	Chr3	10479410	10479845
	Chr3	10480920	10481360
	Chr3	10482870	10483350
	Chr3	10483365	10483725
	Chr3	10493130	10493400
	Chr3	10510515	10511030
	Chr3	10511180	10511440
	Chr3	10514295	10514590
	Chr3	10531130	10531910
	Chr3	10545975	10546400
	Chr3	10546825	10547020
	Chr3	10552460	10552820
	Chr3	10558990	10559265
	Chr3	10559280	10559880
	Chr3	10559905	10560845
	Chr3	10560975	10561980
	Chr3	10564775	10565240
	Chr3	10573700	10573920
	Chr3	10574190	10574500
	Chr3	10605295	10605535
	Chr3	10636245	10636450
	Chr3	10638005	10638245
	Chr3	10638405	10638740
	Chr3	10640910	10641110
	Chr3	10641145	10642215
	Chr3	10643860	10644485
	Chr3	10645170	10645790
	Chr3	10681555	10681810
	Chr3	10748035	10748290
	Chr3	10748955	10749235
	Chr3	10751345	10751695
	Chr3	10751735	10751945
	Chr3	10762940	10763305
	Chr3	10764090	10764350
	Chr3	10765670	10765875
	Chr3	10766110	10766325
	Chr3	10776940	10777165
	Chr3	10777375	10777580
	Chr3	10806435	10807665
	Chr3	10810285	10810515
	Chr3	10810720	10811515
	Chr3	10812175	10812835
	Chr3	10812865	10813165
	Chr3	10816330	10816595
	Chr3	10816715	10818810
	Chr3	10821695	10822055
	Chr3	10825700	10826000
	Chr3	10826185	10826465
	Chr3	10835245	10835480
	Chr3	10837520	10837920
	Chr3	10860255	10860525
	Chr3	10862880	10863140
	Chr3	10864940	10865205
	Chr3	10884520	10885830
	Chr3	10885935	10887110
	Chr3	10887160	10888760
	Chr3	10888940	10889260
	Chr3	10889275	10889505
	Chr3	10890225	10891140
	Chr3	10891155	10891285
	Chr3	10917840	10918600
	Chr3	10918760	10919145
	Chr3	10919175	10919210
	Chr3	10919445	10919905
	Chr3	10920480	10920715
	Chr3	10921435	10922270
	Chr3	10922405	10922620
	Chr3	10922650	10922905
	Chr3	10927665	10928115
	Chr3	10928425	10928720
	Chr3	10929050	10929270
	Chr3	10929375	10929980
	Chr3	10930030	10930615
	Chr3	10930745	10931210
	Chr3	10931355	10933255
	Chr3	10946830	10947195
	Chr3	10953190	10953415
	Chr3	10953695	10954585
	Chr3	10970275	10970485
	Chr3	10970545	10970680
	Chr3	10978575	10979260
	Chr3	10979390	10979745
	Chr3	10990585	10990800
	Chr3	10991035	10991170
	Chr3	10997950	10998335
	Chr3	11000095	11000640
	Chr3	11000850	11001020
	Chr3	11016225	11016765
	Chr3	11016790	11017820
	Chr3	11017835	11020685
	Chr3	11024165	11025170
	Chr3	11025325	11025625
	Chr3	11028150	11028955
	Chr3	11032295	11032560
	Chr3	11043745	11043970
	Chr3	11047015	11047165
	Chr3	11054225	11054480
	Chr3	11054840	11055700
	Chr3	11055820	11056565
	Chr3	11056695	11056710
	Chr3	11056800	11057285
	Chr3	11057505	11058610
	Chr3	11058735	11061820
	Chr3	11061960	11062535
	Chr3	11064340	11064875
	Chr3	11065320	11066200
	Chr3	11066745	11067010
	Chr3	11067805	11068235
	Chr3	11068275	11068505
	Chr3	11068630	11069095
	Chr3	11069715	11069970
	Chr3	11070055	11070345
	Chr3	11070590	11071250
	Chr3	11079090	11079320
	Chr3	11087200	11087470
	Chr3	11093985	11094220
	Chr3	11094240	11094510
	Chr3	11097270	11097485
	Chr3	11112360	11112920
	Chr3	11115680	11116065
	Chr3	11116080	11116525
	Chr3	11116630	11116935
	Chr3	11116980	11117430
	Chr3	11117895	11118595
	Chr3	11119685	11120010
	Chr3	11120285	11120590
	Chr3	11132680	11132890
	Chr3	11135430	11135640
	Chr3	11142500	11143035
	Chr3	11143345	11143815
	Chr3	11143950	11144250
	Chr3	11144375	11144850
	Chr3	11144980	11146620
	Chr3	11146670	11146730
	Chr3	11146855	11147090
	Chr3	11147140	11147690
	Chr3	11160175	11160435
	Chr3	11170810	11171315
	Chr3	11171980	11172525
	Chr3	11172960	11173625
	Chr3	11173835	11174095
	Chr3	11174660	11175710
	Chr3	11177000	11177775
	Chr3	11178120	11178365
	Chr3	11180050	11180400
	Chr3	11180555	11181030
	Chr3	11182170	11182390
	Chr3	11183985	11184195
	Chr3	11185235	11185485
	Chr3	11185655	11186595
	Chr3	11186805	11187130
	Chr3	11187245	11187815
	Chr3	11196555	11196925
	Chr3	11197485	11197940
	Chr3	11198800	11199030
	Chr3	11200110	11200440
	Chr3	11203355	11203575
	Chr3	11205320	11205640
	Chr3	11205945	11206175
	Chr3	11207230	11207495
	Chr3	11215335	11215570
	Chr3	11223680	11223985
	Chr3	11224160	11224400
	Chr3	11224485	11224750
	Chr3	11224885	11224985
	Chr3	11225695	11225840
	Chr3	11225950	11226200
	Chr3	11226890	11227190
	Chr3	11227210	11227505
	Chr3	11227950	11228155
	Chr3	11228415	11228460
	Chr3	11228675	11229255
	Chr3	11229375	11229655
	Chr3	11229720	11230035
	Chr3	11230250	11230640
	Chr3	11231055	11231490
	Chr3	11231715	11233390
	Chr3	11233575	11233800
	Chr3	11244315	11244545
	Chr3	11244760	11244870
	Chr3	11244970	11245035
	Chr3	11317530	11318055
	Chr3	11319650	11319955
	Chr3	11320275	11320495
	Chr3	11321560	11322235
	Chr3	11322345	11323150
	Chr3	11324850	11325135
	Chr3	11325735	11326010
	Chr3	11326730	11327065
	Chr3	11328610	11330815
	Chr3	11331155	11333765
	Chr3	11333800	11334935
	Chr3	11335090	11335515
	Chr3	11335555	11336530
	Chr3	11336600	11339290
	Chr3	11339305	11340460
	Chr3	11340645	11342330
	Chr3	11343410	11344255
	Chr3	11344270	11344640
	Chr3	11348655	11350010
	Chr3	11350355	11350720
	Chr3	11350830	11351070
	Chr3	11351180	11351605
	Chr3	11351935	11352375
	Chr3	11352525	11352825
	Chr3	11352860	11353295
	Chr3	11353430	11354160
	Chr3	11354305	11354515
	Chr3	11355420	11355955
	Chr3	11356030	11356630
	Chr3	11356785	11357050
	Chr3	11357275	11357740
	Chr3	11360935	11361130
	Chr3	11361580	11361780
	Chr3	11362665	11362955
	Chr3	11363760	11364755
	Chr3	11365845	11366575
	Chr3	11368640	11368920
	Chr3	11369485	11370900
	Chr3	11371150	11371400
	Chr3	11372260	11372680
	Chr3	11377060	11378150
	Chr3	11378325	11379095
	Chr3	11379160	11379570
	Chr3	11379615	11379855
	Chr3	11379875	11380175
	Chr3	11380235	11380480
	Chr3	11388035	11388235
	Chr3	11388250	11388580
	Chr3	11388810	11389455
	Chr3	11389755	11389985
	Chr3	11390005	11390320
	Chr3	11390350	11390640
	Chr3	11391395	11392125
	Chr3	11393800	11394030
	Chr3	11396940	11396960
	Chr3	11397000	11397315
	Chr3	15900000	15900295
	Chr3	15915645	15915945
	Chr3	15916275	15916560
	Chr3	15916690	15917545
	Chr3	15917815	15918310
	Chr3	15918655	15918885
	Chr3	15919175	15919495
	Chr3	15923030	15923875
	Chr3	15931145	15931520
	Chr3	15932235	15932710
	Chr3	15933105	15934230
	Chr3	15938585	15938830
	Chr3	15943475	15943620
	Chr3	15943645	15944060
	Chr3	15944825	15945085
	Chr3	15945925	15946190
	Chr3	15948000	15948270
	Chr3	15955490	15956515
	Chr3	15959960	15960225
	Chr3	15960475	15960925
	Chr3	15962570	15962860
	Chr3	15962880	15963095
	Chr3	15963225	15963840
	Chr3	15964095	15964640
	Chr3	15965045	15965360
	Chr3	15965810	15966265
	Chr3	15966760	15967005
	Chr3	15967130	15967420
	Chr3	15996680	15996985
	Chr3	15997375	15997860
	Chr3	15997995	16000040
	Chr3	16005715	16005950
	Chr3	16039060	16039850
	Chr3	16040870	16040945
	Chr3	16041040	16041390
	Chr3	16043635	16043840
	Chr3	16060985	16061075
	Chr3	16064355	16064875
	Chr3	16082655	16082915
	Chr3	16083425	16083665
	Chr3	16083785	16084165
	Chr3	16084430	16084975
	Chr3	16086040	16086260
	Chr3	16086690	16087160
	Chr3	16087180	16087800
	Chr3	16101170	16101375
	Chr3	16101410	16102260
	Chr3	16102490	16102740
	Chr3	16102865	16103205
	Chr3	16103790	16104000
	Chr3	16104420	16104600
	Chr3	16104635	16104945
	Chr3	16105915	16106140
	Chr3	16128210	16128450
	Chr3	16143255	16143490
	Chr3	16146505	16146745
	Chr3	16152320	16152670
	Chr3	16154915	16155150
	Chr3	16155685	16156015
	Chr3	16156185	16156455
	Chr3	16160795	16161030
	Chr3	16161540	16161945
	Chr3	16173015	16173300
	Chr3	16173665	16173990
	Chr3	16174220	16174505
	Chr3	16174640	16174980
	Chr3	16175115	16175860
	Chr3	16176080	16176385
	Chr3	16176430	16177430
	Chr3	16177675	16177990
	Chr3	16178035	16178370
	Chr3	16178830	16179550
	Chr3	16179585	16181110
	Chr3	16181400	16181605
	Chr3	16182605	16182930
	Chr3	16204010	16204320
	Chr3	16240880	16241140
	Chr3	16241425	16241815
	Chr3	16244925	16245775
	Chr3	16245820	16246255
	Chr3	16246450	16246650
	Chr3	16246885	16247540
	Chr3	16247710	16249300
	Chr3	16274945	16275100
	Chr3	16279920	16280210
	Chr3	16307315	16307555
	Chr3	16321605	16322040
	Chr3	16331585	16331825
	Chr3	16332665	16332900
	Chr3	16333405	16334265
	Chr3	16334375	16334975
	Chr3	16334990	16335905
	Chr3	16335920	16336965
	Chr3	16337090	16337525
	Chr3	16337780	16340955
	Chr3	16341495	16341695
	Chr3	16356320	16356790
	Chr3	16408660	16409225
[truncated: 1,623 more rows]

## Sheet: ZF off-targets
	ZF off-target hyper DMRs peaks				ZF off-target peaks
	Chr1	371919	373761		Chr1	2323	2584
	Chr1	583674	583980		Chr1	2958	3389
	Chr1	1293365	1293635		Chr1	30467	30986
	Chr1	1545217	1546213		Chr1	43601	43957
	Chr1	1612568	1613316		Chr1	46930	47496
	Chr1	1778008	1778487		Chr1	49068	49366
	Chr1	1886752	1887088		Chr1	72129	72858
	Chr1	2025232	2025665		Chr1	81028	81320
	Chr1	2164347	2165781		Chr1	81415	81779
	Chr1	2174639	2176598		Chr1	91180	91899
	Chr1	2565630	2566727		Chr1	98901	99444
	Chr1	2993413	2994089		Chr1	102679	103021
	Chr1	3047177	3048151		Chr1	103559	104251
	Chr1	3063483	3063970		Chr1	109007	109311
	Chr1	3494858	3495637		Chr1	141954	142601
	Chr1	3860230	3860967		Chr1	145890	146541
	Chr1	3905143	3905885		Chr1	149111	149550
	Chr1	4131872	4132603		Chr1	151568	152177
	Chr1	4319333	4319717		Chr1	156155	156862
	Chr1	4418892	4419395		Chr1	170928	171285
	Chr1	4742522	4743300		Chr1	173075	173529
	Chr1	4965976	4966655		Chr1	175752	176225
	Chr1	5019607	5020510		Chr1	179417	179762
	Chr1	5279725	5280959		Chr1	181685	182892
	Chr1	5358437	5359761		Chr1	189518	189936
	Chr1	5865980	5866515		Chr1	206733	208281
	Chr1	6137898	6138851		Chr1	208475	209867
	Chr1	6556696	6557297		Chr1	212204	212611
	Chr1	6614973	6615686		Chr1	217782	218241
	Chr1	6655068	6656567		Chr1	218557	219387
	Chr1	7448303	7449030		Chr1	231207	231511
	Chr1	7682328	7683403		Chr1	232804	233432
	Chr1	7744621	7745310		Chr1	237516	238041
	Chr1	7792126	7792457		Chr1	240418	241207
	Chr1	8161026	8161441		Chr1	243941	244683
	Chr1	9061318	9061840		Chr1	270604	271124
	Chr1	9272772	9273281		Chr1	284275	284696
	Chr1	9314029	9314513		Chr1	289792	290247
	Chr1	9458776	9459950		Chr1	318957	319442
	Chr1	9656700	9657053		Chr1	321677	322120
	Chr1	9787411	9788370		Chr1	341668	342598
	Chr1	9892866	9893364		Chr1	358328	358910
	Chr1	9901202	9901942		Chr1	362902	364892
	Chr1	10018139	10018857		Chr1	369798	370126
	Chr1	10151613	10152269		Chr1	370997	371269
	Chr1	10558076	10558544		Chr1	371362	371750
	Chr1	10630656	10631303		Chr1	371919	373761
	Chr1	11166802	11167210		Chr1	389292	390094
	Chr1	11169735	11170582		Chr1	391863	392331
	Chr1	11286062	11286581		Chr1	392759	393166
	Chr1	11631348	11631816		Chr1	398316	398702
	Chr1	11633971	11634625		Chr1	417499	417984
	Chr1	11763110	11764063		Chr1	427120	427408
	Chr1	12054327	12055512		Chr1	430225	431133
	Chr1	12055982	12056521		Chr1	434505	434869
	Chr1	12136512	12136764		Chr1	435431	435832
	Chr1	12241467	12241937		Chr1	437613	437845
	Chr1	12394036	12394668		Chr1	443468	443943
	Chr1	12433384	12434361		Chr1	447656	448037
	Chr1	12474334	12475171		Chr1	468835	470415
	Chr1	12638647	12639054		Chr1	480449	481481
	Chr1	13118682	13119229		Chr1	485519	486140
	Chr1	13459983	13460470		Chr1	486730	487018
	Chr1	13529085	13529690		Chr1	488444	488739
	Chr1	16759479	16759833		Chr1	516831	517638
	Chr1	17075819	17076823		Chr1	541116	541776
	Chr1	17222940	17223551		Chr1	560680	561534
	Chr1	17324668	17325327		Chr1	562863	563231
	Chr1	17350673	17351232		Chr1	565713	567056
	Chr1	17564977	17565221		Chr1	581125	581477
	Chr1	17651603	17652144		Chr1	583674	583980
	Chr1	17761034	17761855		Chr1	585246	585716
	Chr1	18128601	18130095		Chr1	596075	596446
	Chr1	18197634	18198310		Chr1	606439	606789
	Chr1	18201543	18201877		Chr1	607497	607786
	Chr1	18204300	18205956		Chr1	608503	609051
	Chr1	18363770	18364614		Chr1	612738	613164
	Chr1	18414054	18414408		Chr1	615271	615640
	Chr1	18760027	18761325		Chr1	615814	616108
	Chr1	19636855	19638067		Chr1	628559	629154
	Chr1	19701133	19701614		Chr1	642912	643273
	Chr1	19723780	19724747		Chr1	653099	653827
	Chr1	20009418	20010421		Chr1	656024	656412
	Chr1	20273122	20273853		Chr1	657052	657501
	Chr1	20277623	20278303		Chr1	678933	679455
	Chr1	20818935	20819545		Chr1	737948	738228
	Chr1	21563465	21563735		Chr1	748106	748867
	Chr1	21886447	21887221		Chr1	756848	757247
	Chr1	21976479	21976900		Chr1	766808	767330
	Chr1	22040208	22040718		Chr1	767503	767920
	Chr1	22365381	22366020		Chr1	769253	770091
	Chr1	22727334	22727747		Chr1	770197	771092
	Chr1	22808819	22809338		Chr1	771241	771899
	Chr1	23239646	23240266		Chr1	789977	790411
	Chr1	23910436	23910989		Chr1	793244	793836
	Chr1	24134765	24135359		Chr1	798877	799225
	Chr1	24267120	24267860		Chr1	804521	805166
	Chr1	24481660	24481954		Chr1	810407	810832
	Chr1	24649670	24650675		Chr1	826319	826762
	Chr1	24766575	24767373		Chr1	857898	858491
	Chr1	25383597	25384020		Chr1	880453	880901
	Chr1	25424542	25425791		Chr1	883105	883783
	Chr1	25740908	25741732		Chr1	896014	896633
	Chr1	25822071	25822814		Chr1	902305	902753
	Chr1	26009629	26011170		Chr1	924995	925335
	Chr1	26365504	26366650		Chr1	929053	929502
	Chr1	26460713	26461803		Chr1	942934	943689
	Chr1	27055583	27055898		Chr1	944235	944786
	Chr1	27069661	27070147		Chr1	948512	948979
	Chr1	27674246	27674635		Chr1	951701	952136
	Chr1	27761105	27761488		Chr1	1004325	1004798
	Chr1	27989014	27989331		Chr1	1013444	1013762
	Chr1	28239158	28239903		Chr1	1015399	1015825
	Chr1	28775420	28776323		Chr1	1017219	1018384
	Chr1	28974248	28975594		Chr1	1026491	1027548
	Chr1	29419456	29420293		Chr1	1028224	1029191
	Chr1	30034489	30035857		Chr1	1033136	1033534
	Chr1	30053425	30054938		Chr1	1048305	1048804
	Chr2	299295	299882		Chr1	1070779	1071167
	Chr2	353076	353525		Chr1	1085603	1086840
	Chr2	397433	397731		Chr1	1105741	1106382
	Chr2	445365	445650		Chr1	1114126	1114816
	Chr2	918390	919439		Chr1	1129237	1130194
	Chr2	962344	962995		Chr1	1134434	1134800
	Chr2	1407553	1407855		Chr1	1154847	1155260
	Chr2	1715300	1715998		Chr1	1159117	1159535
	Chr2	1903848	1904282		Chr1	1164533	1165536
	Chr2	6035546	6036315		Chr1	1174874	1175442
	Chr2	6501018	6501402		Chr1	1226028	1226636
	Chr2	6857167	6857776		Chr1	1233604	1233965
	Chr2	6896110	6896697		Chr1	1240222	1240552
	Chr2	7095546	7095825		Chr1	1256420	1256766
	Chr2	7283869	7284256		Chr1	1257755	1258086
	Chr2	7830775	7833235		Chr1	1269408	1269921
	Chr2	7877775	7878192		Chr1	1279195	1280049
	Chr2	8075046	8075424		Chr1	1293365	1293635
	Chr2	8079275	8079763		Chr1	1294365	1294865
	Chr2	8412408	8412868		Chr1	1301725	1302544
	Chr2	8675648	8676120		Chr1	1343436	1343739
	Chr2	9032154	9032468		Chr1	1347826	1348177
	Chr2	9323222	9323627		Chr1	1349620	1350084
	Chr2	9590942	9591265		Chr1	1362928	1363538
	Chr2	9610454	9611632		Chr1	1363651	1363925
	Chr2	9794660	9795311		Chr1	1364927	1365430
	Chr2	9985337	9985740		Chr1	1368499	1369006
	Chr2	10066184	10067855		Chr1	1375800	1376388
	Chr2	10414448	10415027		Chr1	1381777	1382223
	Chr2	10448011	10449799		Chr1	1392063	1392769
	Chr2	10795680	10796131		Chr1	1394396	1394697
	Chr2	11733054	11733500		Chr1	1399142	1399672
	Chr2	11843253	11843530		Chr1	1406533	1406853
	Chr2	11997268	11997713		Chr1	1407145	1407653
	Chr2	12111075	12111607		Chr1	1407935	1408272
	Chr2	12261124	12261676		Chr1	1413844	1414325
	Chr2	12342976	12343790		Chr1	1426371	1426868
	Chr2	12370950	12371826		Chr1	1429112	1429776
	Chr2	12528307	12528910		Chr1	1441099	1441526
	Chr2	12557171	12557635		Chr1	1446592	1447085
	Chr2	12627276	12628032		Chr1	1468682	1469458
	Chr2	12774786	12775527		Chr1	1469708	1470474
	Chr2	13137094	13137438		Chr1	1519600	1520359
	Chr2	13137872	13138448		Chr1	1523779	1524208
	Chr2	13332302	13333291		Chr1	1545217	1546213
	Chr2	13621784	13622337		Chr1	1548660	1548916
	Chr2	13623880	13624287		Chr1	1569578	1570037
	Chr2	13815562	13816291		Chr1	1583414	1584131
	Chr2	14147198	14148211		Chr1	1586933	1587993
	Chr2	14395248	14396228		Chr1	1601364	1601895
	Chr2	14646499	14647289		Chr1	1605678	1606183
	Chr2	14680752	14681562		Chr1	1608060	1608503
	Chr2	15115825	15116127		Chr1	1611390	1611797
	Chr2	15274930	15275492		Chr1	1612568	1613316
	Chr2	15326821	15327646		Chr1	1615838	1616185
	Chr2	15493322	15494271		Chr1	1623226	1623626
	Chr2	15564274	15565120		Chr1	1630130	1630867
	Chr2	15709299	15709596		Chr1	1640899	1641291
	Chr2	15724689	15725086		Chr1	1642888	1643363
	Chr2	16064176	16064556		Chr1	1661414	1661786
	Chr2	16090413	16090882		Chr1	1663012	1663579
	Chr2	16540377	16540773		Chr1	1667486	1667948
	Chr2	16642987	16643318		Chr1	1668101	1668779
	Chr2	16770279	16772204		Chr1	1692025	1692351
	Chr2	17240481	17241342		Chr1	1696503	1696817
	Chr2	17818832	17821187		Chr1	1702540	1703149
	Chr2	17907080	17907919		Chr1	1704465	1705130
	Chr2	18079473	18081114		Chr1	1706518	1707211
	Chr2	18398675	18399091		Chr1	1713329	1713861
	Chr2	18482907	18484008		Chr1	1722609	1723024
	Chr2	18689327	18691041		Chr1	1743925	1744899
	Chr2	18726896	18728122		Chr1	1759801	1760245
	Chr2	18797997	18798522		Chr1	1778008	1778487
	Chr2	18812045	18813426		Chr1	1779063	1779890
	Chr2	19255514	19258774		Chr1	1782206	1782605
	Chr2	19260239	19262323		Chr1	1786388	1786670
	Chr2	19305673	19306292		Chr1	1829601	1830106
	Chr2	19352361	19353610		Chr1	1842614	1842918
	Chr3	207053	207861		Chr1	1878601	1879112
	Chr3	466540	468500		Chr1	1886752	1887088
	Chr3	519174	519599		Chr1	1889138	1889561
	Chr3	663942	664520		Chr1	1905943	1906523
	Chr3	1438903	1440345		Chr1	1910261	1910632
	Chr3	1793340	1793623		Chr1	1928166	1928549
	Chr3	3393741	3394033		Chr1	1942858	1943582
	Chr3	3467175	3467547		Chr1	1946686	1947212
	Chr3	4359448	4359976		Chr1	1956381	1956739
	Chr3	4605838	4606372		Chr1	1965626	1966249
	Chr3	4843580	4844345		Chr1	1977174	1977615
	Chr3	4847003	4848005		Chr1	2003156	2003464
	Chr3	5565914	5567443		Chr1	2007142	2007798
	Chr3	6014670	6015279		Chr1	2014352	2014885
	Chr3	6465932	6466187		Chr1	2025232	2025665
	Chr3	6651926	6652316		Chr1	2031958	2032223
	Chr3	6920916	6922443		Chr1	2047274	2047608
	Chr3	7070868	7071171		Chr1	2047720	2047733
	Chr3	7289238	7290100		Chr1	2051627	2052413
	Chr3	7383819	7384669		Chr1	2059263	2059682
	Chr3	7397017	7398055		Chr1	2060132	2060387
	Chr3	7670448	7671066		Chr1	2079318	2079665
	Chr3	8030023	8030450		Chr1	2090870	2091734
	Chr3	8061252	8061989		Chr1	2103693	2104117
	Chr3	8194314	8195219		Chr1	2104747	2105066
	Chr3	8224517	8226081		Chr1	2107894	2108323
	Chr3	8264575	8264956		Chr1	2111371	2111790
	Chr3	8365074	8365612		Chr1	2118053	2118434
	Chr3	8574652	8574999		Chr1	2135205	2135930
	Chr3	8659774	8660205		Chr1	2141246	2141842
	Chr3	8770243	8770628		Chr1	2143656	2144006
	Chr3	8778635	8779307		Chr1	2159481	2159936
	Chr3	8812156	8812808		Chr1	2164347	2165781
	Chr3	8865904	8866567		Chr1	2172417	2173424
	Chr3	9121132	9122308		Chr1	2174639	2176598
	Chr3	9153373	9153926		Chr1	2201463	2201955
	Chr3	9346252	9346692		Chr1	2212312	2212775
	Chr3	9584846	9585874		Chr1	2213195	2213724
	Chr3	9814443	9815610		Chr1	2213980	2215267
	Chr3	9864549	9865531		Chr1	2220984	2221545
	Chr3	10221559	10221924		Chr1	2222601	2223076
	Chr3	10238438	10238772		Chr1	2228992	2229955
	Chr3	10752352	10752858		Chr1	2231634	2232062
	Chr3	10908813	10909440		Chr1	2239980	2240467
	Chr3	10914633	10915338		Chr1	2244657	2245199
	Chr3	11070977	11071922		Chr1	2280496	2283196
	Chr3	11148126	11148389		Chr1	2284180	2285473
	Chr3	11585253	11586003		Chr1	2291226	2291498
[truncated: 10,522 more rows]

## Sheet: H3K27me3
	Teano_K27Marked_geneIDs							Teano_K27Unmarked_geneIDs
[truncated: 26,940 more rows]

[truncated: 2 more sheets: NRPE1, h1 hyper CHG]
